# Supplementary material for: Identification of a druggable binding pocket in the spike protein reveals a key site for existing drugs potentially capable of combating Covid-19 infectivity
Source: BMC Mol Cell Biol. 2020 Jul 1;21:49. doi: 10.1186/s12860-020-00294-x (PMC7327214; doi:10.1186/s12860-020-00294-x)
Supplement: Supplementary file 1 — Additional file 1. Supplementary_data_drug_scores.xlsx - The spreadsheet of data used and analysed in this paper. [file 12860_2020_294_MOESM1_ESM.xlsx]

## Sheet: All Data
name	ZINC	Class	Subclass	key	LedockScore	SminaScore	VinaScore	LedockScore	SminaScore	VinaScore	Av.RMSD	Std.RMSD	LedockPC	SminaPC	VinaPC	RMSDPC	ComboPC	C.ring	C.other	N.ring	N.other	O.ring	O.other	P	S	#.of.Ring	Molecular_weight	LogP	Number_of_HBA_1	Number_of_HBA_2	Number_of_HBD_1	Number_of_HBD_2	Number_of_acidic_groups	Number_of_aliphatic_OH_groups	Number_of_basic_groups	Fraction_of_rotatable_bonds	Number_of_heavy_bonds	Number_of_heterocycles	Number_of_hydrophobic_groups	MolarRefractivity	Number_of_atoms	Number_of_halogen_atoms	Number_of_B_atoms	Number_of_Br_atoms	Number_of_Cl_atoms	Number_of_I_atoms	Number_of_F_atoms	Number_of_N_atoms	Number_of_O_atoms
Flumecinol	ZINC000000000314	Benzene and substituted derivatives	Diphenylmethanes	1	-3.85	-7.22404	-7	3.85	7.22404	7	2.44507	1.06929	0.901	0.079	0.129	0.75	0.6325	12	4	0	0	0	1	0	0	2	280.289	5.947	16	1	1	1	0	1	0	0.190476	21	0	0	87.7488	35	3	0	0	0	0	3	0	1
Flumecinol	ZINC000000000314	Benzene and substituted derivatives	Diphenylmethanes	2	-3.42	-7.61902	-7.4	3.42	7.61902	7.4	3.10485	1.98032	0.975	0.024	0.045	0.955	0.7325	12	4	0	0	0	1	0	0	2	280.289	5.947	16	1	1	1	0	1	0	0.190476	21	0	0	87.7488	35	3	0	0	0	0	3	0	1
Flumecinol	ZINC000000000314	Benzene and substituted derivatives	Diphenylmethanes	3	-4.06	-7.14985	-7	4.06	7.14985	7	3.07145	1.91082	0.836	0.093	0.129	0.95	0.71625	12	4	0	0	0	1	0	0	2	280.289	5.947	16	1	1	1	0	1	0	0.190476	21	0	0	87.7488	35	3	0	0	0	0	3	0	1
Prozapine	ZINC000001482157	Benzene and substituted derivatives	Diphenylmethanes	4	-4.82	-6.79212	-6.8	4.82	6.79212	6.8	2.31797	1.62429	0.456	0.203	0.194	0.7	0.5125	18	3	1	0	0	0	0	0	3	293.454	10.0474	27	0	1	1	0	0	1	0.208333	24	1	0	122.415	49	0	0	0	0	0	0	1	0
Prozapine	ZINC000001482157	Benzene and substituted derivatives	Diphenylmethanes	5	-5.19	-6.60327	-6.5	5.19	6.60327	6.5	2.57493	1.09882	0.259	0.276	0.313	0.795	0.5405	18	3	1	0	0	0	0	0	3	293.454	10.0474	27	0	1	1	0	0	1	0.208333	24	1	0	122.415	49	0	0	0	0	0	0	1	0
Prozapine	ZINC000001482157	Benzene and substituted derivatives	Diphenylmethanes	6	-4.8	-6.91221	-6.9	4.8	6.91221	6.9	2.29889	1.61018	0.47	0.158	0.158	0.692	0.503	18	3	1	0	0	0	0	0	3	293.454	10.0474	27	0	1	1	0	0	1	0.208333	24	1	0	122.415	49	0	0	0	0	0	0	1	0
Octriptyline	ZINC000002005382	Dibenzocycloheptenes	?	7	-4.15	-4.30441	-4.7	4.15	4.30441	4.7	2.25747	1.05555	0.803	0.995	0.985	0.68	0.787	16	4	0	1	0	0	0	0	4	275.395	8.5464	21	0	1	0	0	0	1	0.125	24	0	0	112.114	42	0	0	0	0	0	0	1	0
Milverine	ZINC000001482110	Benzene and substituted derivatives	Diphenylmethanes	8	-5.04	-7.71868	-7.7	5.04	7.71868	7.7	3.00746	1.44777	0.336	0.017	0.016	0.934	0.555	17	3	1	1	0	0	0	0	3	288.394	7.9244	22	2	1	1	0	0	0	0.25	24	1	0	113.176	42	0	0	0	0	0	0	2	0
Milverine	ZINC000001482110	Benzene and substituted derivatives	Diphenylmethanes	9	-5.7	-7.44238	-7.4	5.7	7.44238	7.4	3.33879	1.68193	0.091	0.041	0.045	0.982	0.525	17	3	1	1	0	0	0	0	3	288.394	7.9244	22	2	1	1	0	0	0	0.25	24	1	0	113.176	42	0	0	0	0	0	0	2	0
Milverine	ZINC000001482110	Benzene and substituted derivatives	Diphenylmethanes	10	-5.25	-7.70838	-7.7	5.25	7.70838	7.7	2.7372	1.25616	0.228	0.019	0.016	0.851	0.4865	17	3	1	1	0	0	0	0	3	288.394	7.9244	22	2	1	1	0	0	0	0.25	24	1	0	113.176	42	0	0	0	0	0	0	2	0
Fenpiprane	ZINC000001482064	Benzene and substituted derivatives	Diphenylmethanes	11	-4.58	-7.22358	-7.3	4.58	7.22358	7.3	1.77148	1.24597	0.587	0.079	0.061	0.456	0.39	17	3	1	0	0	0	0	0	3	279.427	9.3406	25	0	1	1	0	0	1	0.217391	23	1	0	115.494	46	0	0	0	0	0	0	1	0
Fenpiprane	ZINC000001482064	Benzene and substituted derivatives	Diphenylmethanes	12	-5.06	-7.04814	-7	5.06	7.04814	7	2.42409	0.990758	0.326	0.116	0.129	0.742	0.48475	17	3	1	0	0	0	0	0	3	279.427	9.3406	25	0	1	1	0	0	1	0.217391	23	1	0	115.494	46	0	0	0	0	0	0	1	0
Fenpiprane	ZINC000001482064	Benzene and substituted derivatives	Diphenylmethanes	13	-4.88	-6.98234	-6.6	4.88	6.98234	6.6	2.06497	0.738731	0.422	0.138	0.268	0.597	0.471	17	3	1	0	0	0	0	0	3	279.427	9.3406	25	0	1	1	0	0	1	0.217391	23	1	0	115.494	46	0	0	0	0	0	0	1	0
Flumecinol	ZINC000000000314	Benzene and substituted derivatives	Diphenylmethanes	14	-4.12	-7.52794	-7.2	4.12	7.52794	7.2	2.01653	1.16388	0.816	0.033	0.08	0.572	0.51	12	4	0	0	0	1	0	0	2	280.289	5.947	16	1	1	1	0	1	0	0.190476	21	0	0	87.7488	35	3	0	0	0	0	3	0	1
Flumecinol	ZINC000000000314	Benzene and substituted derivatives	Diphenylmethanes	15	-4	-6.52354	-6.2	4	6.52354	6.2	2.86885	1.40331	0.86	0.314	0.474	0.898	0.7825	12	4	0	0	0	1	0	0	2	280.289	5.947	16	1	1	1	0	1	0	0.190476	21	0	0	87.7488	35	3	0	0	0	0	3	0	1
Flumecinol	ZINC000000000314	Benzene and substituted derivatives	Diphenylmethanes	16	-3.89	-6.51738	-6.3	3.89	6.51738	6.3	2.6428	1.59926	0.891	0.318	0.421	0.821	0.7385	12	4	0	0	0	1	0	0	2	280.289	5.947	16	1	1	1	0	1	0	0.190476	21	0	0	87.7488	35	3	0	0	0	0	3	0	1
phenyl_acetylsalicylate	ZINC000000351310	Depsides and depsidones	?	17	-4.56	-5.95846	-5.9	4.56	5.95846	5.9	2.50531	1.20966	0.601	0.631	0.662	0.769	0.70025	12	3	0	0	0	4	0	0	2	256.257	4.3778	16	4	0	0	0	0	0	0.25	20	0	0	82.0255	31	0	0	0	0	0	0	0	4
phenyl_acetylsalicylate	ZINC000000351310	Depsides and depsidones	?	18	-4.85	-5.96805	-5.9	4.85	5.96805	5.9	1.09741	0.374347	0.44	0.627	0.662	0.151	0.351	12	3	0	0	0	4	0	0	2	256.257	4.3778	16	4	0	0	0	0	0	0.25	20	0	0	82.0255	31	0	0	0	0	0	0	0	4
phenyl_acetylsalicylate	ZINC000000351310	Depsides and depsidones	?	19	-4.16	-5.81193	-6	4.16	5.81193	6	1.61255	0.274261	0.798	0.72	0.6	0.388	0.5435	12	3	0	0	0	4	0	0	2	256.257	4.3778	16	4	0	0	0	0	0	0.25	20	0	0	82.0255	31	0	0	0	0	0	0	0	4
Nafcaproic-acid	ZINC000000001765	Naphthalenes	?	20	-3.49	-5.14335	-5	3.49	5.14335	5	2.65349	1.86234	0.969	0.945	0.963	0.823	0.8945	10	6	0	0	0	2	0	0	2	241.31	6.654	18	2	0	1	1	0	0	0.210526	19	0	0	90.6305	35	0	0	0	0	0	0	0	2
Nafcaproic-acid	ZINC000000001765	Naphthalenes	?	21	-2.99	-5.73721	-5.8	2.99	5.73721	5.8	1.66281	0.651816	0.998	0.753	0.715	0.408	0.63225	10	6	0	0	0	2	0	0	2	241.31	6.654	18	2	0	1	1	0	0	0.210526	19	0	0	90.6305	35	0	0	0	0	0	0	0	2
Nafcaproic-acid	ZINC000000001765	Naphthalenes	?	22	-3.09	-5.2055	-5	3.09	5.2055	5	1.72922	0.714905	0.995	0.934	0.963	0.443	0.711	10	6	0	0	0	2	0	0	2	241.31	6.654	18	2	0	1	1	0	0	0.210526	19	0	0	90.6305	35	0	0	0	0	0	0	0	2
Fenclexonium	ZINC000001481843	Organonitrogen compounds	Amines	23	-4.92	-6.83707	-6.8	4.92	6.83707	6.8	2.61325	1.84404	0.403	0.183	0.194	0.809	0.55375	17	4	1	0	0	0	0	0	3	298.494	11.5203	32	0	0	0	0	0	1	0.208333	24	1	0	129.561	54	0	0	0	0	0	0	1	0
Fenclexonium	ZINC000001481843	Organonitrogen compounds	Amines	24	-4.8	-6.7577	-6.8	4.8	6.7577	6.8	2.44432	1.70384	0.47	0.214	0.194	0.749	0.5405	17	4	1	0	0	0	0	0	3	298.494	11.5203	32	0	0	0	0	0	1	0.208333	24	1	0	129.561	54	0	0	0	0	0	0	1	0
Fenclexonium	ZINC000001481843	Organonitrogen compounds	Amines	25	-5.03	-6.82636	-6.8	5.03	6.82636	6.8	2.65695	1.87325	0.342	0.188	0.194	0.825	0.5465	17	4	1	0	0	0	0	0	3	298.494	11.5203	32	0	0	0	0	0	1	0.208333	24	1	0	129.561	54	0	0	0	0	0	0	1	0
Phenprocoumon	ZINC000100030679	Coumarins and derivatives	Hydroxycoumarins	26	-5.42	-6.26657	-6.2	5.42	6.26657	6.2	1.6163	1.09711	0.169	0.453	0.474	0.389	0.35525	15	3	0	0	1	2	0	0	3	280.323	5.7245	18	3	1	1	0	0	0	0.130435	23	1	0	100.824	37	0	0	0	0	0	0	0	3
Phenprocoumon	ZINC000100030679	Coumarins and derivatives	Hydroxycoumarins	27	-4.92	-6.72067	-6.8	4.92	6.72067	6.8	1.68109	1.1501	0.403	0.229	0.194	0.419	0.35875	15	3	0	0	1	2	0	0	3	280.323	5.7245	18	3	1	1	0	0	0	0.130435	23	1	0	100.824	37	0	0	0	0	0	0	0	3
Naftifine	ZINC000001530977	Naphthalenes	?	28	-5.06	-6.88227	-7.5	5.06	6.88227	7.5	1.94326	1.2415	0.326	0.168	0.031	0.539	0.35875	16	5	0	1	0	0	0	0	3	287.406	8.671	21	0	1	1	0	0	1	0.208333	24	0	0	119.298	43	0	0	0	0	0	0	1	0
Naftifine	ZINC000001530977	Naphthalenes	?	29	-5.18	-7.6113	-7.1	5.18	7.6113	7.1	1.809	1.18313	0.264	0.025	0.101	0.475	0.32875	16	5	0	1	0	0	0	0	3	287.406	8.671	21	0	1	1	0	0	1	0.208333	24	0	0	119.298	43	0	0	0	0	0	0	1	0
Naftifine	ZINC000001530977	Naphthalenes	?	30	-4.99	-7.07751	-7.7	4.99	7.07751	7.7	1.91895	1.32464	0.364	0.109	0.016	0.529	0.3595	16	5	0	1	0	0	0	0	3	287.406	8.671	21	0	1	1	0	0	1	0.208333	24	0	0	119.298	43	0	0	0	0	0	0	1	0
Odalprofen	ZINC000003777867	Benzene and substituted derivatives	Diphenylmethanes	31	-3.97	-8.06159	-8	3.97	8.06159	8	2.05536	1.43639	0.868	0.004	0.005	0.591	0.51375	15	5	2	0	0	2	0	0	3	320.392	6.9373	23	4	0	0	0	0	0	0.230769	26	1	0	114.275	44	0	0	0	0	0	0	2	2
Odalprofen	ZINC000003777867	Benzene and substituted derivatives	Diphenylmethanes	32	-4.21	-8.01547	-8	4.21	8.01547	8	2.48116	1.69404	0.777	0.006	0.005	0.761	0.576	15	5	2	0	0	2	0	0	3	320.392	6.9373	23	4	0	0	0	0	0	0.230769	26	1	0	114.275	44	0	0	0	0	0	0	2	2
Odalprofen	ZINC000003777867	Benzene and substituted derivatives	Diphenylmethanes	33	-5.54	-6.61235	-6.6	5.54	6.61235	6.6	2.82151	1.28895	0.13	0.271	0.268	0.884	0.5415	15	5	2	0	0	2	0	0	3	320.392	6.9373	23	4	0	0	0	0	0	0.230769	26	1	0	114.275	44	0	0	0	0	0	0	2	2
Odalprofen	ZINC000003777867	Benzene and substituted derivatives	Diphenylmethanes	34	-4.45	-6.3764	-6.2	4.45	6.3764	6.2	3.24221	1.41792	0.658	0.391	0.474	0.974	0.77	15	5	2	0	0	2	0	0	3	320.392	6.9373	23	4	0	0	0	0	0	0.230769	26	1	0	114.275	44	0	0	0	0	0	0	2	2
Homosalate	ZINC000000393813	Benzene and substituted derivatives	Benzoic acids and derivatives	35	-4.36	-6.82448	-6.5	4.36	6.82448	6.5	1.89506	1.06074	0.707	0.189	0.313	0.518	0.514	12	4	0	0	0	3	0	0	2	262.349	7.0078	25	3	1	1	0	0	0	0.15	20	0	0	99.4185	41	0	0	0	0	0	0	0	3
Homosalate	ZINC000000393813	Benzene and substituted derivatives	Benzoic acids and derivatives	36	-4.59	-6.78359	-6.7	4.59	6.78359	6.7	1.48531	0.95052	0.581	0.207	0.229	0.336	0.3705	12	4	0	0	0	3	0	0	2	262.349	7.0078	25	3	1	1	0	0	0	0.15	20	0	0	99.4185	41	0	0	0	0	0	0	0	3
Homosalate	ZINC000000393813	Benzene and substituted derivatives	Benzoic acids and derivatives	37	-4.27	-6.80824	-6.6	4.27	6.80824	6.6	1.54323	1.06361	0.751	0.196	0.268	0.359	0.43425	12	4	0	0	0	3	0	0	2	262.349	7.0078	25	3	1	1	0	0	0	0.15	20	0	0	99.4185	41	0	0	0	0	0	0	0	3
Pronetalol	ZINC000000967921	Naphthalenes	?	38	-4.84	-7.0721	-6.7	4.84	7.0721	6.7	1.66282	0.482397	0.446	0.111	0.229	0.408	0.37275	10	5	0	1	0	1	0	0	2	229.323	6.3747	20	1	2	1	0	1	1	0.222222	18	0	0	93.6899	36	0	0	0	0	0	0	1	1
Pronetalol	ZINC000000967921	Naphthalenes	?	39	-4.92	-6.7893	-6.4	4.92	6.7893	6.4	1.63907	1.01277	0.403	0.204	0.362	0.398	0.39025	10	5	0	1	0	1	0	0	2	229.323	6.3747	20	1	2	1	0	1	1	0.222222	18	0	0	93.6899	36	0	0	0	0	0	0	1	1
Pronetalol	ZINC000000967921	Naphthalenes	?	40	-4.92	-6.86078	-6.5	4.92	6.86078	6.5	1.68789	1.0236	0.403	0.177	0.313	0.422	0.39	10	5	0	1	0	1	0	0	2	229.323	6.3747	20	1	2	1	0	1	1	0.222222	18	0	0	93.6899	36	0	0	0	0	0	0	1	1
Terodiline	ZINC000001481798	Benzene and substituted derivatives	Diphenylmethanes	41	-3.82	-6.56407	-6.6	3.82	6.56407	6.6	2.42668	1.70625	0.91	0.294	0.268	0.743	0.666	12	8	0	1	0	0	0	0	2	281.443	9.6572	27	0	1	0	0	0	1	0.272727	22	0	0	122.086	48	0	0	0	0	0	0	1	0
Terodiline	ZINC000001481798	Benzene and substituted derivatives	Diphenylmethanes	42	-4.66	-6.56314	-6.6	4.66	6.56314	6.6	3.28724	2.31597	0.543	0.295	0.268	0.978	0.69175	16	4	1	0	0	0	0	0	3	281.443	9.6572	27	0	1	0	0	0	1	0.272727	22	0	0	122.086	48	0	0	0	0	0	0	1	0
Terodiline	ZINC000001481798	Benzene and substituted derivatives	Diphenylmethanes	43	-4.13	-5.87311	-6	4.13	5.87311	6	3.32771	1.63707	0.812	0.687	0.6	0.981	0.8435	12	8	0	1	0	0	0	0	2	281.443	9.6572	27	0	1	0	0	0	1	0.272727	22	0	0	122.086	48	0	0	0	0	0	0	1	0
Dimefadane	ZINC000002037189	Indanes	?	44	-4.86	-6.34958	-6.4	4.86	6.34958	6.4	1.24003	0.192826	0.435	0.408	0.362	0.218	0.30825	15	2	0	1	0	0	0	0	3	237.346	7.2602	19	0	1	1	0	0	1	0.1	20	0	0	97.4047	37	0	0	0	0	0	0	1	0
Dimefadane	ZINC000002037189	Indanes	?	45	-5.01	-6.38068	-6.4	5.01	6.38068	6.4	1.24617	0.839212	0.352	0.389	0.362	0.222	0.2895	15	2	0	1	0	0	0	0	3	237.346	7.2602	19	0	1	1	0	0	1	0.1	20	0	0	97.4047	37	0	0	0	0	0	0	1	0
Dimefadane	ZINC000002037189	Indanes	?	46	-4.62	-6.34785	-6.4	4.62	6.34785	6.4	0.750407	0.504072	0.564	0.409	0.362	0.042	0.2525	15	2	0	1	0	0	0	0	3	237.346	7.2602	19	0	1	1	0	0	1	0.1	20	0	0	97.4047	37	0	0	0	0	0	0	1	0
Eucaine	ZINC000000319774	Benzene and substituted derivatives	Benzoic acids and derivatives	47	-3.59	-6.48641	-6.5	3.59	6.48641	6.5	1.14342	0.793718	0.954	0.335	0.313	0.172	0.40275	11	4	1	0	0	2	0	0	2	247.338	6.9588	23	2	1	0	0	0	1	0.157895	19	1	0	92.9418	39	0	0	0	0	0	0	1	2
Eucaine	ZINC000000319774	Benzene and substituted derivatives	Benzoic acids and derivatives	48	-4.39	-6.67449	-6.8	4.39	6.67449	6.8	0.857908	0.236484	0.692	0.248	0.194	0.066	0.2545	11	4	1	0	0	2	0	0	2	247.338	6.9588	23	2	1	0	0	0	1	0.157895	19	1	0	92.9418	39	0	0	0	0	0	0	1	2
Eucaine	ZINC000000319774	Benzene and substituted derivatives	Benzoic acids and derivatives	49	-4.8	-6.66372	-6.7	4.8	6.66372	6.7	1.50761	0.332673	0.47	0.253	0.229	0.344	0.34675	11	4	1	0	0	2	0	0	2	247.338	6.9588	23	2	1	0	0	0	1	0.157895	19	1	0	92.9418	39	0	0	0	0	0	0	1	2
Octriptyline	ZINC000002005382	Dibenzocycloheptenes	?	50	-4.51	-5.32027	-5.3	4.51	5.32027	5.3	2.71402	1.91032	0.628	0.914	0.912	0.842	0.806	16	4	0	1	0	0	0	0	4	275.395	8.5464	21	0	1	0	0	0	1	0.125	24	0	0	112.114	42	0	0	0	0	0	0	1	0
Octriptyline	ZINC000002005382	Dibenzocycloheptenes	?	51	-4.92	-7.63271	-7.6	4.92	7.63271	7.6	0.970094	0.642818	0.403	0.024	0.024	0.097	0.15525	16	4	0	1	0	0	0	0	4	275.395	8.5464	21	0	1	0	0	0	1	0.125	24	0	0	112.114	42	0	0	0	0	0	0	1	0
Dexketoprofen	ZINC000000005560	Benzene and substituted derivatives	Benzophenones	52	-4.25	-7.4007	-7.4	4.25	7.4007	7.4	0.542103	0.358786	0.761	0.05	0.045	0.015	0.209	12	4	0	0	0	3	0	0	2	253.277	5.1689	15	3	0	1	1	0	0	0.2	20	0	0	84.467	32	0	0	0	0	0	0	0	3
Dexketoprofen	ZINC000000005560	Benzene and substituted derivatives	Benzophenones	53	-4.39	-7.00678	-7	4.39	7.00678	7	1.67919	0.704296	0.692	0.127	0.129	0.418	0.41425	12	4	0	0	0	3	0	0	2	253.277	5.1689	15	3	0	1	1	0	0	0.2	20	0	0	84.467	32	0	0	0	0	0	0	0	3
Dexketoprofen	ZINC000000005560	Benzene and substituted derivatives	Benzophenones	54	-3.98	-7.34614	-7.4	3.98	7.34614	7.4	3.73481	1.4222	0.865	0.058	0.045	0.997	0.726	12	4	0	0	0	3	0	0	2	253.277	5.1689	15	3	0	1	1	0	0	0.2	20	0	0	84.467	32	0	0	0	0	0	0	0	3
Homosalate	ZINC000000393813	Benzene and substituted derivatives	Benzoic acids and derivatives	55	-4.02	-6.44851	-6.5	4.02	6.44851	6.5	1.27698	0.78358	0.852	0.355	0.313	0.235	0.40875	12	4	0	0	0	3	0	0	2	262.349	7.0078	25	3	1	1	0	0	0	0.15	20	0	0	99.4185	41	0	0	0	0	0	0	0	3
Homosalate	ZINC000000393813	Benzene and substituted derivatives	Benzoic acids and derivatives	56	-4.5	-7.07398	-6.9	4.5	7.07398	6.9	1.65344	0.903797	0.634	0.11	0.158	0.403	0.3995	12	4	0	0	0	3	0	0	2	262.349	7.0078	25	3	1	1	0	0	0	0.15	20	0	0	99.4185	41	0	0	0	0	0	0	0	3
Homosalate	ZINC000000393813	Benzene and substituted derivatives	Benzoic acids and derivatives	57	-4.42	-7.02418	-6.8	4.42	7.02418	6.8	1.14806	0.534548	0.677	0.122	0.194	0.174	0.30475	12	4	0	0	0	3	0	0	2	262.349	7.0078	25	3	1	1	0	0	0	0.15	20	0	0	99.4185	41	0	0	0	0	0	0	0	3
Enilospirone	ZINC000034150724	Azaspirodecane derivatives	?	58	-5.31	-6.09569	-6.2	5.31	6.09569	6.2	1.03799	0.72256	0.204	0.557	0.474	0.123	0.231	14	1	1	0	1	2	0	0	3	295.766	6.7199	22	4	1	1	0	0	0	0.0909091	22	1	0	93.0086	38	1	0	0	1	0	0	1	3
Doxenitoin	ZINC000026660333	Benzene and substituted derivatives	Diphenylmethanes	59	-3.89	-7.51064	-7.5	3.89	7.51064	7.5	1.09297	0.737224	0.891	0.034	0.031	0.148	0.3045	15	0	2	0	0	1	0	0	3	238.29	4.5874	16	2	2	1	0	0	1	0.1	20	1	0	80.2139	32	0	0	0	0	0	0	2	1
Doxenitoin	ZINC000026660333	Benzene and substituted derivatives	Diphenylmethanes	60	-4.52	-5.21811	-5.2	4.52	5.21811	5.2	1.10993	0.765939	0.625	0.932	0.933	0.156	0.4675	15	0	2	0	0	1	0	0	3	238.29	4.5874	16	2	2	1	0	0	1	0.1	20	1	0	80.2139	32	0	0	0	0	0	0	2	1
Doxenitoin	ZINC000026660333	Benzene and substituted derivatives	Diphenylmethanes	61	-3.85	-5.89042	-5.9	3.85	5.89042	5.9	1.28407	0.886708	0.901	0.676	0.662	0.239	0.51025	15	0	2	0	0	1	0	0	3	238.29	4.5874	16	2	2	1	0	0	1	0.1	20	1	0	80.2139	32	0	0	0	0	0	0	2	1
Terodiline	ZINC000001481798	Benzene and substituted derivatives	Diphenylmethanes	62	-4.17	-6.11029	-6.3	4.17	6.11029	6.3	3.1023	1.55145	0.794	0.547	0.421	0.955	0.78125	12	8	0	1	0	0	0	0	2	281.443	9.6572	27	0	1	0	0	0	1	0.272727	22	0	0	122.086	48	0	0	0	0	0	0	1	0
Terodiline	ZINC000001481798	Benzene and substituted derivatives	Diphenylmethanes	63	-4.62	-6.33348	-6.1	4.62	6.33348	6.1	2.7953	1.96534	0.564	0.417	0.538	0.873	0.712	12	8	0	1	0	0	0	0	2	281.443	9.6572	27	0	1	0	0	0	1	0.272727	22	0	0	122.086	48	0	0	0	0	0	0	1	0
Terodiline	ZINC000001481798	Benzene and substituted derivatives	Diphenylmethanes	64	-3.88	-6.04015	-6.2	3.88	6.04015	6.2	2.95801	1.44838	0.893	0.588	0.474	0.92	0.80175	12	8	0	1	0	0	0	0	2	281.443	9.6572	27	0	1	0	0	0	1	0.272727	22	0	0	122.086	48	0	0	0	0	0	0	1	0
Primaperone	ZINC000000001978	Organooxygen compounds	Carbonyl compounds	65	-5.34	-6.43656	-6.3	5.34	6.43656	6.3	1.35842	0.222858	0.195	0.362	0.421	0.275	0.2915	11	4	1	0	0	1	0	0	2	249.329	7.2808	21	1	1	1	0	0	1	0.263158	19	1	0	90.9084	38	1	0	0	0	0	1	1	1
Primaperone	ZINC000000001978	Organooxygen compounds	Carbonyl compounds	66	-4.5	-6.50618	-6.5	4.5	6.50618	6.5	1.24107	0.85755	0.634	0.324	0.313	0.218	0.34575	11	4	1	0	0	1	0	0	2	249.329	7.2808	21	1	1	1	0	0	1	0.263158	19	1	0	90.9084	38	1	0	0	0	0	1	1	1
Primaperone	ZINC000000001978	Organooxygen compounds	Carbonyl compounds	67	-4.7	-6.48769	-6.5	4.7	6.48769	6.5	1.02963	0.711331	0.522	0.334	0.313	0.119	0.26825	11	4	1	0	0	1	0	0	2	249.329	7.2808	21	1	1	1	0	0	1	0.263158	19	1	0	90.9084	38	1	0	0	0	0	1	1	1
Drobuline	ZINC000005442097	Benzene and substituted derivatives	Diphenylmethanes	68	-5.33	-6.53831	-6.4	5.33	6.53831	6.4	2.7415	1.69662	0.2	0.305	0.362	0.853	0.567	12	7	0	1	0	1	0	0	2	283.415	8.2996	26	1	2	1	0	1	1	0.318182	22	0	0	116.627	46	0	0	0	0	0	0	1	1
Drobuline	ZINC000005442097	Benzene and substituted derivatives	Diphenylmethanes	69	-4.96	-6.53378	-6.4	4.96	6.53378	6.4	2.6002	1.11434	0.378	0.308	0.362	0.804	0.587	12	7	0	1	0	1	0	0	2	283.415	8.2996	26	1	2	1	0	1	1	0.318182	22	0	0	116.627	46	0	0	0	0	0	0	1	1
Drobuline	ZINC000005442097	Benzene and substituted derivatives	Diphenylmethanes	70	-4.35	-6.5395	-6.4	4.35	6.5395	6.4	2.71892	1.8118	0.713	0.305	0.362	0.844	0.69075	12	7	0	1	0	1	0	0	2	283.415	8.2996	26	1	2	1	0	1	1	0.318182	22	0	0	116.627	46	0	0	0	0	0	0	1	1
Epinastine	ZINC000000006157	Benzazepines	Dibenzazepines	71	-4.71	-7.25996	-7.2	4.71	7.25996	7.2	1.35453	0.3232	0.516	0.073	0.08	0.273	0.2855	16	0	2	1	0	0	0	0	4	249.317	5.4753	18	3	1	0	0	0	2	0	22	2	0	86.8902	34	0	0	0	0	0	0	3	0
Epinastine	ZINC000000006157	Benzazepines	Dibenzazepines	72	-4.62	-5.52422	-5.4	4.62	5.52422	5.4	1.58471	0.913417	0.564	0.848	0.888	0.376	0.551	16	0	2	1	0	0	0	0	4	249.317	5.4753	18	3	1	0	0	0	2	0	22	2	0	86.8902	34	0	0	0	0	0	0	3	0
Nepafenac	ZINC000005162311	Benzene and substituted derivatives	Benzophenones	73	-5.87	-7.21122	-7	5.87	7.21122	7	2.13402	1.4669	0.063	0.083	0.129	0.63	0.363	12	3	0	2	0	2	0	0	2	254.289	5.1623	18	4	2	0	0	0	0	0.2	20	0	0	87.8221	33	0	0	0	0	0	0	2	2
Nepafenac	ZINC000005162311	Benzene and substituted derivatives	Benzophenones	74	-5.72	-7.07413	-7.2	5.72	7.07413	7.2	2.11255	1.22219	0.088	0.11	0.08	0.619	0.3515	12	3	0	2	0	2	0	0	2	254.289	5.1623	18	4	2	0	0	0	0	0.2	20	0	0	87.8221	33	0	0	0	0	0	0	2	2
Nepafenac	ZINC000005162311	Benzene and substituted derivatives	Benzophenones	75	-5.46	-6.82202	-6.9	5.46	6.82202	6.9	2.07915	1.21372	0.156	0.19	0.158	0.604	0.3805	12	3	0	2	0	2	0	0	2	254.289	5.1623	18	4	2	0	0	0	0	0.2	20	0	0	87.8221	33	0	0	0	0	0	0	2	2
Perastine	ZINC000001482139	Benzene and substituted derivatives	Diphenylmethanes	76	-5.21	-6.98782	-7	5.21	6.98782	7	2.83805	1.00993	0.249	0.135	0.129	0.89	0.5395	17	3	1	0	0	1	0	0	3	295.426	9.2722	26	1	1	1	0	0	1	0.25	24	1	0	116.579	47	0	0	0	0	0	0	1	1
Perastine	ZINC000001482139	Benzene and substituted derivatives	Diphenylmethanes	77	-5.43	-6.86484	-6.9	5.43	6.86484	6.9	2.2467	1.5834	0.165	0.175	0.158	0.676	0.41875	17	3	1	0	0	1	0	0	3	295.426	9.2722	26	1	1	1	0	0	1	0.25	24	1	0	116.579	47	0	0	0	0	0	0	1	1
Perastine	ZINC000001482139	Benzene and substituted derivatives	Diphenylmethanes	78	-4.79	-6.53289	-6.7	4.79	6.53289	6.7	2.88517	1.31848	0.474	0.309	0.229	0.901	0.62625	17	3	1	0	0	1	0	0	3	295.426	9.2722	26	1	1	1	0	0	1	0.25	24	1	0	116.579	47	0	0	0	0	0	0	1	1
Ibuproxam	ZINC000005284667	Prenol lipids	Monoterpenoids	79	-4.68	-6.06713	-6.1	4.68	6.06713	6.1	1.02737	0.460371	0.533	0.571	0.538	0.117	0.32625	6	7	0	1	0	2	0	0	1	221.3	6.1931	21	3	2	2	1	0	0	0.3125	16	0	0	84.0346	35	0	0	0	0	0	0	1	2
Ibuproxam	ZINC000005284667	Prenol lipids	Monoterpenoids	80	-4.59	-6.01373	-5.9	4.59	6.01373	5.9	0.771535	0.299824	0.581	0.602	0.662	0.045	0.33325	6	7	0	1	0	2	0	0	1	221.3	6.1931	21	3	2	2	1	0	0	0.3125	16	0	0	84.0346	35	0	0	0	0	0	0	1	2
Ibuproxam	ZINC000005284667	Prenol lipids	Monoterpenoids	81	-4.66	-6.59649	-6.5	4.66	6.59649	6.5	0.94091	0.574116	0.543	0.28	0.313	0.089	0.2585	6	7	0	1	0	2	0	0	1	221.3	6.1931	21	3	2	2	1	0	0	0.3125	16	0	0	84.0346	35	0	0	0	0	0	0	1	2
Dexketoprofen	ZINC000000005560	Benzene and substituted derivatives	Benzophenones	82	-4.51	-6.97422	-7	4.51	6.97422	7	0.872398	0.587191	0.628	0.141	0.129	0.072	0.22525	12	4	0	0	0	3	0	0	2	253.277	5.1689	15	3	0	1	1	0	0	0.2	20	0	0	84.467	32	0	0	0	0	0	0	0	3
Dexketoprofen	ZINC000000005560	Benzene and substituted derivatives	Benzophenones	83	-4.13	-6.91588	-6.9	4.13	6.91588	6.9	2.77545	1.04321	0.812	0.157	0.158	0.868	0.6765	12	4	0	0	0	3	0	0	2	253.277	5.1689	15	3	0	1	1	0	0	0.2	20	0	0	84.467	32	0	0	0	0	0	0	0	3
Dexketoprofen	ZINC000000005560	Benzene and substituted derivatives	Benzophenones	84	-4.53	-6.84414	-6.8	4.53	6.84414	6.8	0.466292	0.305162	0.62	0.18	0.194	0.009	0.208	12	4	0	0	0	3	0	0	2	253.277	5.1689	15	3	0	1	1	0	0	0.2	20	0	0	84.467	32	0	0	0	0	0	0	0	3
Pipradrol	ZINC000000000633	Benzene and substituted derivatives	Diphenylmethanes	85	-4.12	-5.57267	-5.5	4.12	5.57267	5.5	1.89809	1.14505	0.816	0.832	0.852	0.52	0.677	17	1	1	0	0	1	0	0	3	267.372	6.7272	22	1	2	1	0	1	1	0.136364	22	1	0	102.846	41	0	0	0	0	0	0	1	1
Pipradrol	ZINC000000000633	Benzene and substituted derivatives	Diphenylmethanes	86	-3.4	-6.28107	-6.1	3.4	6.28107	6.1	1.60971	0.880672	0.978	0.447	0.538	0.387	0.5725	17	1	1	0	0	1	0	0	3	267.372	6.7272	22	1	2	1	0	1	1	0.136364	22	1	0	102.846	41	0	0	0	0	0	0	1	1
Pipradrol	ZINC000000000633	Benzene and substituted derivatives	Diphenylmethanes	87	-3.19	-7.30037	-7.1	3.19	7.30037	7.1	1.53623	0.827473	0.99	0.065	0.101	0.356	0.45075	17	1	1	0	0	1	0	0	3	267.372	6.7272	22	1	2	1	0	1	1	0.136364	22	1	0	102.846	41	0	0	0	0	0	0	1	1
Cifenline	ZINC000000002266	Benzene and substituted derivatives	Diphenylmethanes	88	-4.57	-5.14934	-5.2	4.57	5.14934	5.2	2.75096	1.22376	0.595	0.944	0.933	0.859	0.8115	18	0	2	0	0	0	0	0	4	262.356	6.186	20	2	1	1	0	0	1	0.130435	23	1	0	95.9748	38	0	0	0	0	0	0	2	0
Cifenline	ZINC000000002266	Benzene and substituted derivatives	Diphenylmethanes	89	-4.53	-5.1815	-5.1	4.53	5.1815	5.1	2.44712	1.70882	0.62	0.94	0.952	0.75	0.768	18	0	2	0	0	0	0	0	4	262.356	6.186	20	2	1	1	0	0	1	0.130435	23	1	0	95.9748	38	0	0	0	0	0	0	2	0
Cyprolidol	ZINC000001752005	Benzene and substituted derivatives	Diphenylmethanes	90	-4.95	-7.81704	-7.6	4.95	7.81704	7.6	2.46351	1.01279	0.384	0.013	0.024	0.755	0.4795	20	1	1	0	0	1	0	0	4	301.389	6.4485	21	2	1	1	0	1	0	0.153846	26	1	0	111.95	42	0	0	0	0	0	0	1	1
Cyprolidol	ZINC000001752005	Benzene and substituted derivatives	Diphenylmethanes	91	-4.77	-7.78513	-7.6	4.77	7.78513	7.6	3.55765	2.28663	0.483	0.015	0.024	0.993	0.62325	20	1	1	0	0	1	0	0	4	301.389	6.4485	21	2	1	1	0	1	0	0.153846	26	1	0	111.95	42	0	0	0	0	0	0	1	1
Cyprolidol	ZINC000001752005	Benzene and substituted derivatives	Diphenylmethanes	92	-4.05	-7.81588	-7.6	4.05	7.81588	7.6	2.23045	1.35974	0.839	0.013	0.024	0.669	0.55025	20	1	1	0	0	1	0	0	4	301.389	6.4485	21	2	1	1	0	1	0	0.153846	26	1	0	111.95	42	0	0	0	0	0	0	1	1
Azacyclonol	ZINC000012375998	Benzene and substituted derivatives	Diphenylmethanes	93	-3.84	-6.66164	-6.5	3.84	6.66164	6.5	2.85475	1.77585	0.905	0.253	0.313	0.894	0.7515	17	1	1	0	0	1	0	0	3	267.372	6.7272	22	1	2	1	0	1	1	0.136364	22	1	0	102.846	41	0	0	0	0	0	0	1	1
Azacyclonol	ZINC000012375998	Benzene and substituted derivatives	Diphenylmethanes	94	-3.75	-5.69532	-5.6	3.75	5.69532	5.6	2.90576	1.88022	0.925	0.774	0.81	0.907	0.88725	17	1	1	0	0	1	0	0	3	267.372	6.7272	22	1	2	1	0	1	1	0.136364	22	1	0	102.846	41	0	0	0	0	0	0	1	1
Azacyclonol	ZINC000012375998	Benzene and substituted derivatives	Diphenylmethanes	95	-3.47	-5.63157	-5.6	3.47	5.63157	5.6	2.91299	1.86661	0.97	0.807	0.81	0.909	0.8995	17	1	1	0	0	1	0	0	3	267.372	6.7272	22	1	2	1	0	1	1	0.136364	22	1	0	102.846	41	0	0	0	0	0	0	1	1
Fenclexonium	ZINC000001481843	Organonitrogen compounds	Amines	96	-3.87	-6.05881	-6.2	3.87	6.05881	6.2	2.50762	1.0236	0.896	0.578	0.474	0.771	0.728	17	4	1	0	0	0	0	0	3	298.494	11.5203	32	0	0	0	0	0	1	0.208333	24	1	0	129.561	54	0	0	0	0	0	0	1	0
Fenclexonium	ZINC000001481843	Organonitrogen compounds	Amines	97	-3.57	-6.63346	-6.8	3.57	6.63346	6.8	2.52614	1.772	0.957	0.265	0.194	0.775	0.67525	17	4	1	0	0	0	0	0	3	298.494	11.5203	32	0	0	0	0	0	1	0.208333	24	1	0	129.561	54	0	0	0	0	0	0	1	0
Fenclexonium	ZINC000001481843	Organonitrogen compounds	Amines	98	-3.99	-6.87232	-6.6	3.99	6.87232	6.6	3.65732	2.54636	0.862	0.172	0.268	0.996	0.7805	17	4	1	0	0	0	0	0	3	298.494	11.5203	32	0	0	0	0	0	1	0.208333	24	1	0	129.561	54	0	0	0	0	0	0	1	0
Amfenac	ZINC000000000909	Benzene and substituted derivatives	Benzophenones	99	-5.2	-6.9964	-6.8	5.2	6.9964	6.8	2.34291	0.736505	0.252	0.132	0.194	0.711	0.467	12	3	0	1	0	3	0	0	2	254.265	4.9309	15	4	1	1	1	0	0	0.2	20	0	0	82.8188	31	0	0	0	0	0	0	1	3
Amfenac	ZINC000000000909	Benzene and substituted derivatives	Benzophenones	100	-5.2	-7.25692	-7.1	5.2	7.25692	7.1	2.35985	1.0944	0.252	0.074	0.101	0.717	0.44675	12	3	0	1	0	3	0	0	2	254.265	4.9309	15	4	1	1	1	0	0	0.2	20	0	0	82.8188	31	0	0	0	0	0	0	1	3
Amfenac	ZINC000000000909	Benzene and substituted derivatives	Benzophenones	101	-4.91	-6.79251	-6.6	4.91	6.79251	6.6	1.98097	1.06795	0.409	0.203	0.268	0.554	0.44625	12	3	0	1	0	3	0	0	2	254.265	4.9309	15	4	1	1	1	0	0	0.2	20	0	0	82.8188	31	0	0	0	0	0	0	1	3
Pipradrol	ZINC000000000633	Benzene and substituted derivatives	Diphenylmethanes	102	-3.79	-6.48614	-6.3	3.79	6.48614	6.3	2.78452	1.73275	0.915	0.335	0.421	0.871	0.7695	17	1	1	0	0	1	0	0	3	267.372	6.7272	22	1	2	1	0	1	1	0.136364	22	1	0	102.846	41	0	0	0	0	0	0	1	1
Pipradrol	ZINC000000000633	Benzene and substituted derivatives	Diphenylmethanes	103	-3.67	-6.23296	-6.3	3.67	6.23296	6.3	2.78281	1.7971	0.94	0.472	0.421	0.87	0.77525	17	1	1	0	0	1	0	0	3	267.372	6.7272	22	1	2	1	0	1	1	0.136364	22	1	0	102.846	41	0	0	0	0	0	0	1	1
Pipradrol	ZINC000000000633	Benzene and substituted derivatives	Diphenylmethanes	104	-4.08	-6.83751	-6.7	4.08	6.83751	6.7	2.69989	1.70196	0.829	0.182	0.229	0.837	0.683	17	1	1	0	0	1	0	0	3	267.372	6.7272	22	1	2	1	0	1	1	0.136364	22	1	0	102.846	41	0	0	0	0	0	0	1	1
Guacetisal	ZINC000000000348	Depsides and depsidones	?	105	-4.59	-6.34466	-6.3	4.59	6.34466	6.3	1.72914	1.20796	0.581	0.412	0.421	0.443	0.472	12	4	0	0	0	5	0	0	2	286.283	5.0507	19	5	0	0	0	0	0	0.272727	22	0	0	90.6315	35	0	0	0	0	0	0	0	5
Guacetisal	ZINC000000000348	Depsides and depsidones	?	106	-4.97	-6.31709	-6.4	4.97	6.31709	6.4	1.87662	1.24438	0.372	0.424	0.362	0.506	0.4365	12	4	0	0	0	5	0	0	2	286.283	5.0507	19	5	0	0	0	0	0	0.272727	22	0	0	90.6315	35	0	0	0	0	0	0	0	5
Guacetisal	ZINC000000000348	Depsides and depsidones	?	107	-4.36	-6.77074	-6.6	4.36	6.77074	6.6	2.22413	0.957481	0.707	0.211	0.268	0.665	0.57625	12	4	0	0	0	5	0	0	2	286.283	5.0507	19	5	0	0	0	0	0	0.272727	22	0	0	90.6315	35	0	0	0	0	0	0	0	5
Alovudine	ZINC000001725270	Pyrimidine nucleosides	Pyrimidine 2,3-dideoxyribonucleosides	108	-5.13	-6.09983	-6	5.13	6.09983	6	1.1677	0.545925	0.29	0.554	0.6	0.183	0.314	8	2	2	0	1	3	0	0	2	244.222	2.317	17	5	2	2	0	1	0	0.111111	18	2	0	70.9472	30	1	0	0	0	0	1	2	4
Alovudine	ZINC000001725270	Pyrimidine nucleosides	Pyrimidine 2,3-dideoxyribonucleosides	109	-5.29	-5.80118	-5.7	5.29	5.80118	5.7	1.09995	0.518264	0.213	0.725	0.763	0.152	0.32	8	2	2	0	1	3	0	0	2	244.222	2.317	17	5	2	2	0	1	0	0.111111	18	2	0	70.9472	30	1	0	0	0	0	1	2	4
Alovudine	ZINC000001725270	Pyrimidine nucleosides	Pyrimidine 2,3-dideoxyribonucleosides	110	-5.21	-6.10609	-5.9	5.21	6.10609	5.9	0.793209	0.485654	0.249	0.551	0.662	0.049	0.25225	8	2	2	0	1	3	0	0	2	244.222	2.317	17	5	2	2	0	1	0	0.111111	18	2	0	70.9472	30	1	0	0	0	0	1	2	4
Dizocilpine	ZINC000025757829	Dibenzocycloheptenes	?	111	-3.81	-6.91978	-6.9	3.81	6.91978	6.9	2.09911	1.47691	0.912	0.156	0.158	0.613	0.574	15	1	1	0	0	0	0	0	4	221.303	5.8481	15	0	1	0	0	0	1	0	20	2	0	83.5943	32	0	0	0	0	0	0	1	0
Dizocilpine	ZINC000025757829	Dibenzocycloheptenes	?	112	-3.73	-5.77012	-5.8	3.73	5.77012	5.8	1.87558	1.31528	0.929	0.739	0.715	0.505	0.6635	15	1	1	0	0	0	0	0	4	221.303	5.8481	15	0	1	0	0	0	1	0	20	2	0	83.5943	32	0	0	0	0	0	0	1	0
Fipamezole	ZINC000003612873	Indanes	?	113	-4.04	-5.39367	-5.4	4.04	5.39367	5.4	1.70816	1.19691	0.844	0.893	0.888	0.432	0.649	12	2	2	0	0	0	0	0	3	230.286	5.6058	16	1	1	1	0	0	0	0.105263	19	1	0	80.9154	32	1	0	0	0	0	1	2	0
Fipamezole	ZINC000003612873	Indanes	?	114	-3.82	-5.34904	-5.4	3.82	5.34904	5.4	2.04316	1.43784	0.91	0.907	0.888	0.585	0.742	12	2	2	0	0	0	0	0	3	230.286	5.6058	16	1	1	1	0	0	0	0.105263	19	1	0	80.9154	32	1	0	0	0	0	1	2	0
Fipamezole	ZINC000003612873	Indanes	?	115	-4.17	-5.35598	-5.4	4.17	5.35598	5.4	1.96356	1.37942	0.794	0.905	0.888	0.546	0.6935	12	2	2	0	0	0	0	0	3	230.286	5.6058	16	1	1	1	0	0	0	0.105263	19	1	0	80.9154	32	1	0	0	0	0	1	2	0
Bifluranol	ZINC000004212152	Stilbenes	?	116	-5.29	-7.59222	-7.3	5.29	7.59222	7.3	2.41149	1.44008	0.213	0.026	0.061	0.735	0.436	12	5	0	0	0	2	0	0	2	292.325	6.2486	20	2	2	2	0	0	0	0.181818	22	0	0	98.787	39	2	0	0	0	0	2	0	2
Bifluranol	ZINC000004212152	Stilbenes	?	117	-4.68	-6.89954	-6.6	4.68	6.89954	6.6	2.00917	1.18625	0.533	0.163	0.268	0.567	0.48375	12	5	0	0	0	2	0	0	2	292.325	6.2486	20	2	2	2	0	0	0	0.181818	22	0	0	98.787	39	2	0	0	0	0	2	0	2
Bifluranol	ZINC000004212152	Stilbenes	?	118	-4.38	-6.75529	-6.4	4.38	6.75529	6.4	2.18589	1.2062	0.698	0.215	0.362	0.652	0.591	12	5	0	0	0	2	0	0	2	292.325	6.2486	20	2	2	2	0	0	0	0.181818	22	0	0	98.787	39	2	0	0	0	0	2	0	2
Crilvastatin	ZINC000003775270	Carboxylic acids and derivatives	Amino acids, peptides, and analogues	119	-4.3	-6.36195	-5.9	4.3	6.36195	5.9	0.768032	0.507693	0.738	0.402	0.662	0.045	0.3725	10	4	1	0	0	3	0	0	2	253.342	6.8922	27	4	1	1	0	0	0	0.157895	19	1	0	91.2076	41	0	0	0	0	0	0	1	3
Crilvastatin	ZINC000003775270	Carboxylic acids and derivatives	Amino acids, peptides, and analogues	120	-4.21	-6.11694	-5.9	4.21	6.11694	5.9	1.17262	0.822174	0.777	0.544	0.662	0.186	0.45275	10	4	1	0	0	3	0	0	2	253.342	6.8922	27	4	1	1	0	0	0	0.157895	19	1	0	91.2076	41	0	0	0	0	0	0	1	3
Crilvastatin	ZINC000003775270	Carboxylic acids and derivatives	Amino acids, peptides, and analogues	121	-4.34	-5.72788	-6.3	4.34	5.72788	6.3	0.995822	0.24707	0.719	0.76	0.421	0.105	0.3375	10	4	1	0	0	3	0	0	2	253.342	6.8922	27	4	1	1	0	0	0	0.157895	19	1	0	91.2076	41	0	0	0	0	0	0	1	3
Loxoprofen	ZINC000001846128	Phenylpropanoic acids	?	122	-4.55	-6.3328	-6.3	4.55	6.3328	6.3	2.60052	1.33974	0.608	0.418	0.421	0.804	0.65925	11	4	0	0	0	3	0	0	2	245.298	6.0349	19	3	0	1	1	0	0	0.210526	19	0	0	85.9075	35	0	0	0	0	0	0	0	3
Loxoprofen	ZINC000001846128	Phenylpropanoic acids	?	123	-3.58	-6.81751	-6.8	3.58	6.81751	6.8	2.26895	1.10624	0.956	0.193	0.194	0.684	0.6295	11	4	0	0	0	3	0	0	2	245.298	6.0349	19	3	0	1	1	0	0	0.210526	19	0	0	85.9075	35	0	0	0	0	0	0	0	3
Loxoprofen	ZINC000001846128	Phenylpropanoic acids	?	124	-4.2	-6.33772	-6.3	4.2	6.33772	6.3	2.16669	1.51197	0.781	0.415	0.421	0.645	0.623	11	4	0	0	0	3	0	0	2	245.298	6.0349	19	3	0	1	1	0	0	0.210526	19	0	0	85.9075	35	0	0	0	0	0	0	0	3
Oxindanac	ZINC000001846144	Benzene and substituted derivatives	Benzophenones	125	-4.42	-6.99591	-6.8	4.42	6.99591	6.8	3.37912	1.64426	0.677	0.132	0.194	0.985	0.71025	15	2	0	0	0	4	0	0	3	281.287	4.5463	16	4	1	2	1	0	0	0.130435	23	0	0	89.68	34	0	0	0	0	0	0	0	4
Oxindanac	ZINC000001846144	Benzene and substituted derivatives	Benzophenones	126	-5	-7.03398	-6.9	5	7.03398	6.9	2.77053	1.77488	0.359	0.12	0.158	0.866	0.56225	15	2	0	0	0	4	0	0	3	281.287	4.5463	16	4	1	2	1	0	0	0.130435	23	0	0	89.68	34	0	0	0	0	0	0	0	4
Oxindanac	ZINC000001846144	Benzene and substituted derivatives	Benzophenones	127	-5.29	-6.9485	-6.8	5.29	6.9485	6.8	3.3249	1.8817	0.213	0.146	0.194	0.98	0.59175	15	2	0	0	0	4	0	0	3	281.287	4.5463	16	4	1	2	1	0	0	0.130435	23	0	0	89.68	34	0	0	0	0	0	0	0	4
Taglutimide	ZINC000017161200	Isoindoles and derivatives	Isoindolines	128	-4.89	-6.80573	-6.8	4.89	6.80573	6.8	1.36895	0.962977	0.418	0.197	0.194	0.28	0.293	14	0	2	0	0	4	0	0	4	276.292	3.7812	22	6	1	1	0	0	0	0.0434783	23	2	0	79.8318	36	0	0	0	0	0	0	2	4
Taglutimide	ZINC000017161200	Isoindoles and derivatives	Isoindolines	129	-4.67	-5.49476	-5.5	4.67	5.49476	5.5	0.976382	0.645413	0.538	0.861	0.852	0.099	0.397	14	0	2	0	0	4	0	0	4	276.292	3.7812	22	6	1	1	0	0	0	0.0434783	23	2	0	79.8318	36	0	0	0	0	0	0	2	4
Ibuprofen_guaiacol_ester	ZINC000000363995	Prenol lipids	Monoterpenoids	130	-4.51	-7.63439	-7.6	4.51	7.63439	7.6	1.94016	1.33271	0.628	0.023	0.024	0.537	0.4315	12	8	0	0	0	3	0	0	2	312.409	8.7619	27	3	0	0	0	0	0	0.291667	24	0	0	118.482	47	0	0	0	0	0	0	0	3
Ibuprofen_guaiacol_ester	ZINC000000363995	Prenol lipids	Monoterpenoids	131	-4.77	-7.64208	-7.6	4.77	7.64208	7.6	1.89112	1.2647	0.483	0.023	0.024	0.515	0.38425	12	8	0	0	0	3	0	0	2	312.409	8.7619	27	3	0	0	0	0	0	0.291667	24	0	0	118.482	47	0	0	0	0	0	0	0	3
Ibuprofen_guaiacol_ester	ZINC000000363995	Prenol lipids	Monoterpenoids	132	-4.9	-7.20368	-7.1	4.9	7.20368	7.1	2.01046	1.36422	0.413	0.085	0.101	0.568	0.4125	12	8	0	0	0	3	0	0	2	312.409	8.7619	27	3	0	0	0	0	0	0.291667	24	0	0	118.482	47	0	0	0	0	0	0	0	3
Menthyl_salicylate	ZINC000003875617	Benzene and substituted derivatives	Benzoic acids and derivatives	133	-4.72	-7.02962	-6.9	4.72	7.02962	6.9	1.12534	0.74446	0.511	0.121	0.158	0.163	0.24875	12	5	0	0	0	3	0	0	2	276.376	7.9294	27	3	1	1	0	0	0	0.190476	21	0	0	106.6	44	0	0	0	0	0	0	0	3
Menthyl_salicylate	ZINC000003875617	Benzene and substituted derivatives	Benzoic acids and derivatives	134	-4.58	-7.03536	-6.9	4.58	7.03536	6.9	1.39681	0.763147	0.587	0.119	0.158	0.294	0.33325	12	5	0	0	0	3	0	0	2	276.376	7.9294	27	3	1	1	0	0	0	0.190476	21	0	0	106.6	44	0	0	0	0	0	0	0	3
Menthyl_salicylate	ZINC000003875617	Benzene and substituted derivatives	Benzoic acids and derivatives	135	-4.25	-7.00394	-6.9	4.25	7.00394	6.9	1.18594	0.60843	0.761	0.128	0.158	0.19	0.32475	12	5	0	0	0	3	0	0	2	276.376	7.9294	27	3	1	1	0	0	0	0.190476	21	0	0	106.6	44	0	0	0	0	0	0	0	3
Rolodine	ZINC000000002036	Pyrrolopyrimidines	Pyrrolo[2,3-d]pyrimidines	136	-6	-7.20974	-7.2	6	7.20974	7.2	1.951	0.646605	0.046	0.083	0.08	0.54	0.3015	12	2	3	1	0	0	0	0	3	238.294	5.2525	17	3	2	2	0	0	0	0.15	20	2	0	87.2568	32	0	0	0	0	0	0	4	0
Rolodine	ZINC000000002036	Pyrrolopyrimidines	Pyrrolo[2,3-d]pyrimidines	137	-7.12	-7.01609	-7	7.12	7.01609	7	0.996243	0.575573	0.002	0.124	0.129	0.105	0.08525	12	2	3	1	0	0	0	0	3	238.294	5.2525	17	3	2	2	0	0	0	0.15	20	2	0	87.2568	32	0	0	0	0	0	0	4	0
Rolodine	ZINC000000002036	Pyrrolopyrimidines	Pyrrolo[2,3-d]pyrimidines	138	-5.77	-7.22419	-7.2	5.77	7.22419	7.2	0.905709	0.605725	0.079	0.079	0.08	0.079	0.07925	12	2	3	1	0	0	0	0	3	238.294	5.2525	17	3	2	2	0	0	0	0.15	20	2	0	87.2568	32	0	0	0	0	0	0	4	0
Isoprofen	ZINC000001846287	Indanes	?	139	-3.64	-7.10352	-7.1	3.64	7.10352	7.1	3.1208	2.16569	0.947	0.103	0.101	0.958	0.741	9	6	0	0	0	2	0	0	2	231.315	7.1505	20	2	0	1	1	0	0	0.166667	18	0	0	87.9805	36	0	0	0	0	0	0	0	2
Isoprofen	ZINC000001846287	Indanes	?	140	-4.34	-5.58072	-5.5	4.34	5.58072	5.5	3.10586	1.05869	0.719	0.828	0.852	0.956	0.87075	9	6	0	0	0	2	0	0	2	231.315	7.1505	20	2	0	1	1	0	0	0.166667	18	0	0	87.9805	36	0	0	0	0	0	0	0	2
Isoprofen	ZINC000001846287	Indanes	?	141	-4.46	-6.70339	-6.7	4.46	6.70339	6.7	3.35719	2.33161	0.652	0.237	0.229	0.983	0.71175	9	6	0	0	0	2	0	0	2	231.315	7.1505	20	2	0	1	1	0	0	0.166667	18	0	0	87.9805	36	0	0	0	0	0	0	0	2
Pentafluranol	ZINC000000000592	Stilbenes	?	142	-4.82	-8.02881	-7.7	4.82	8.02881	7.7	3.01974	1.88714	0.456	0.006	0.016	0.937	0.5865	12	5	0	0	0	2	0	0	2	346.295	6.3513	17	2	2	2	0	0	0	0.2	25	0	0	95.807	39	5	0	0	0	0	5	0	2
Pentafluranol	ZINC000000000592	Stilbenes	?	143	-4.82	-8.04206	-7.7	4.82	8.04206	7.7	2.94114	1.49909	0.456	0.005	0.016	0.915	0.5755	12	5	0	0	0	2	0	0	2	346.295	6.3513	17	2	2	2	0	0	0	0.2	25	0	0	95.807	39	5	0	0	0	0	5	0	2
Cyprolidol	ZINC000001752005	Benzene and substituted derivatives	Diphenylmethanes	144	-4.34	-5.82415	-5.7	4.34	5.82415	5.7	2.42449	1.52396	0.719	0.713	0.763	0.742	0.7415	20	1	1	0	0	1	0	0	4	301.389	6.4485	21	2	1	1	0	1	0	0.153846	26	1	0	111.95	42	0	0	0	0	0	0	1	1
Dioxadrol	ZINC000003080605	Benzene and substituted derivatives	Diphenylmethanes	145	-4.3	-5.72637	-5.7	4.3	5.72637	5.7	2.76784	1.95292	0.738	0.761	0.763	0.865	0.80775	20	0	1	0	2	0	0	0	4	309.409	8.5827	25	2	1	0	0	0	1	0.115385	26	2	0	113.13	46	0	0	0	0	0	0	1	2
Butidrine	ZINC000004212253	Tetralins	?	146	-5.28	-6.56195	-6.4	5.28	6.56195	6.4	1.88185	0.821541	0.217	0.295	0.362	0.51	0.39975	10	6	0	1	0	1	0	0	2	247.382	7.9733	26	1	2	1	0	1	1	0.263158	19	0	0	104.765	43	0	0	0	0	0	0	1	1
Butidrine	ZINC000004212253	Tetralins	?	147	-5.43	-6.66132	-6.5	5.43	6.66132	6.5	1.72745	1.07703	0.165	0.253	0.313	0.441	0.34	10	6	0	1	0	1	0	0	2	247.382	7.9733	26	1	2	1	0	1	1	0.263158	19	0	0	104.765	43	0	0	0	0	0	0	1	1
Butidrine	ZINC000004212253	Tetralins	?	148	-5.25	-6.44902	-6.2	5.25	6.44902	6.2	1.8403	1.02802	0.228	0.354	0.474	0.489	0.42	10	6	0	1	0	1	0	0	2	247.382	7.9733	26	1	2	1	0	1	1	0.263158	19	0	0	104.765	43	0	0	0	0	0	0	1	1
Diflumidone	ZINC000000001294	Benzene and substituted derivatives	Benzophenones	149	-5.86	-7.21509	-7.2	5.86	7.21509	7.2	1.18968	0.822298	0.065	0.082	0.08	0.192	0.13225	12	2	0	1	0	3	0	1	2	311.309	5.8998	15	4	1	1	0	0	0	0.227273	22	0	0	86.2209	32	2	0	0	0	0	2	1	3
Diflumidone	ZINC000000001294	Benzene and substituted derivatives	Benzophenones	150	-6.03	-7.67578	-7.7	6.03	7.67578	7.7	1.13407	0.788714	0.043	0.02	0.016	0.167	0.09825	12	2	0	1	0	3	0	1	2	311.309	5.8998	15	4	1	1	0	0	0	0.227273	22	0	0	86.2209	32	2	0	0	0	0	2	1	3
Diflumidone	ZINC000000001294	Benzene and substituted derivatives	Benzophenones	151	-5.34	-7.6709	-7.6	5.34	7.6709	7.6	1.24474	0.833802	0.195	0.02	0.024	0.221	0.16525	12	2	0	1	0	3	0	1	2	311.309	5.8998	15	4	1	1	0	0	0	0.227273	22	0	0	86.2209	32	2	0	0	0	0	2	1	3
Benzoxiquine	ZINC000000001015	Quinolines and derivatives	?	152	-4.95	-7.21767	-7.4	4.95	7.21767	7.4	0.949013	0.226412	0.384	0.081	0.045	0.092	0.15325	15	1	1	0	0	2	0	0	3	249.269	4.807	14	3	0	0	0	0	0	0.142857	21	1	0	84.7705	30	0	0	0	0	0	0	1	2
Benzoxiquine	ZINC000000001015	Quinolines and derivatives	?	153	-4.43	-6.85959	-7	4.43	6.85959	7	1.17278	0.804267	0.669	0.177	0.129	0.187	0.293	15	1	1	0	0	2	0	0	3	249.269	4.807	14	3	0	0	0	0	0	0.142857	21	1	0	84.7705	30	0	0	0	0	0	0	1	2
Benzoxiquine	ZINC000000001015	Quinolines and derivatives	?	154	-4.88	-6.4283	-6.6	4.88	6.4283	6.6	0.807387	0.557439	0.422	0.367	0.268	0.053	0.199	15	1	1	0	0	2	0	0	3	249.269	4.807	14	3	0	0	0	0	0	0.142857	21	1	0	84.7705	30	0	0	0	0	0	0	1	2
Isoprofen	ZINC000001846287	Indanes	?	155	-3.93	-7.16198	-7.1	3.93	7.16198	7.1	2.75706	1.43718	0.88	0.091	0.101	0.862	0.67625	9	6	0	0	0	2	0	0	2	231.315	7.1505	20	2	0	1	1	0	0	0.166667	18	0	0	87.9805	36	0	0	0	0	0	0	0	2
Isoprofen	ZINC000001846287	Indanes	?	156	-3.64	-7.13468	-7.1	3.64	7.13468	7.1	2.62907	1.82822	0.947	0.097	0.101	0.816	0.67	9	6	0	0	0	2	0	0	2	231.315	7.1505	20	2	0	1	1	0	0	0.166667	18	0	0	87.9805	36	0	0	0	0	0	0	0	2
Isoprofen	ZINC000001846287	Indanes	?	157	-3.56	-7.20436	-7.2	3.56	7.20436	7.2	2.61266	1.3357	0.958	0.085	0.08	0.808	0.6635	9	6	0	0	0	2	0	0	2	231.315	7.1505	20	2	0	1	1	0	0	0.166667	18	0	0	87.9805	36	0	0	0	0	0	0	0	2
Aminacrine	ZINC000019014768	Quinolines and derivatives	Benzoquinolines	158	-4.61	-7.0977	-6.9	4.61	7.0977	6.9	1.46492	0.793181	0.569	0.104	0.158	0.326	0.34475	13	0	1	1	0	0	0	0	3	194.237	4.9638	12	2	1	0	0	0	0	0	17	1	0	74.0348	25	0	0	0	0	0	0	2	0
Aminacrine	ZINC000019014768	Quinolines and derivatives	Benzoquinolines	159	-4.58	-7.08154	-6.9	4.58	7.08154	6.9	1.42094	0.919337	0.587	0.108	0.158	0.305	0.33875	13	0	1	1	0	0	0	0	3	194.237	4.9638	12	2	1	0	0	0	0	0	17	1	0	74.0348	25	0	0	0	0	0	0	2	0
Aminacrine	ZINC000019014768	Quinolines and derivatives	Benzoquinolines	160	-4.56	-7.0756	-6.9	4.56	7.0756	6.9	1.35204	0.593416	0.601	0.11	0.158	0.271	0.32525	13	0	1	1	0	0	0	0	3	194.237	4.9638	12	2	1	0	0	0	0	0	17	1	0	74.0348	25	0	0	0	0	0	0	2	0
Butibufen	ZINC000000015537	Prenol lipids	Monoterpenoids	161	-3.35	-5.40567	-5.4	3.35	5.40567	5.4	1.23315	0.750731	0.983	0.89	0.888	0.215	0.57525	6	8	0	0	0	2	0	0	1	219.304	6.9578	20	2	0	1	1	0	0	0.3125	16	0	0	85.1285	35	0	0	0	0	0	0	0	2
Butibufen	ZINC000000015537	Prenol lipids	Monoterpenoids	162	-3.4	-6.08595	-6.1	3.4	6.08595	6.1	1.28516	0.37772	0.978	0.562	0.538	0.241	0.4995	6	8	0	0	0	2	0	0	1	219.304	6.9578	20	2	0	1	1	0	0	0.3125	16	0	0	85.1285	35	0	0	0	0	0	0	0	2
Butibufen	ZINC000000015537	Prenol lipids	Monoterpenoids	163	-3.38	-6.08892	-6.1	3.38	6.08892	6.1	2.31707	1.61403	0.98	0.561	0.538	0.699	0.729	6	8	0	0	0	2	0	0	1	219.304	6.9578	20	2	0	1	1	0	0	0.3125	16	0	0	85.1285	35	0	0	0	0	0	0	0	2
Salsalate	ZINC000000002062	Depsides and depsidones	?	164	-4.92	-6.51703	-6.5	4.92	6.51703	6.5	1.70163	0.260653	0.403	0.319	0.313	0.428	0.393	12	2	0	0	0	5	0	0	2	257.221	3.1937	13	5	1	2	1	0	0	0.2	20	0	0	74.7335	28	0	0	0	0	0	0	0	5
Salsalate	ZINC000000002062	Depsides and depsidones	?	165	-4.62	-6.66829	-6.3	4.62	6.66829	6.3	1.64928	0.201935	0.564	0.251	0.421	0.401	0.44675	12	2	0	0	0	5	0	0	2	257.221	3.1937	13	5	1	2	1	0	0	0.2	20	0	0	74.7335	28	0	0	0	0	0	0	0	5
Salsalate	ZINC000000002062	Depsides and depsidones	?	166	-5.12	-6.69048	-6.4	5.12	6.69048	6.4	1.27278	0.372575	0.295	0.241	0.362	0.234	0.28125	12	2	0	0	0	5	0	0	2	257.221	3.1937	13	5	1	2	1	0	0	0.2	20	0	0	74.7335	28	0	0	0	0	0	0	0	5
Drobuline	ZINC000005442097	Benzene and substituted derivatives	Diphenylmethanes	167	-5.25	-6.71415	-6.6	5.25	6.71415	6.6	3.11069	1.94559	0.228	0.231	0.268	0.956	0.602	12	7	0	1	0	1	0	0	2	283.415	8.2996	26	1	2	1	0	1	1	0.318182	22	0	0	116.627	46	0	0	0	0	0	0	1	1
Drobuline	ZINC000005442097	Benzene and substituted derivatives	Diphenylmethanes	168	-5.42	-6.71693	-6.6	5.42	6.71693	6.6	2.9156	2.018	0.169	0.231	0.268	0.91	0.56425	12	7	0	1	0	1	0	0	2	283.415	8.2996	26	1	2	1	0	1	1	0.318182	22	0	0	116.627	46	0	0	0	0	0	0	1	1
Drobuline	ZINC000005442097	Benzene and substituted derivatives	Diphenylmethanes	169	-4.8	-6.53353	-6.4	4.8	6.53353	6.4	2.88972	1.35301	0.47	0.308	0.362	0.902	0.659	12	7	0	1	0	1	0	0	2	283.415	8.2996	26	1	2	1	0	1	1	0.318182	22	0	0	116.627	46	0	0	0	0	0	0	1	1
Nonaperone	ZINC000000001828	Organooxygen compounds	Carbonyl compounds	170	-4.75	-7.01949	-7	4.75	7.01949	7	2.08087	1.2113	0.495	0.123	0.129	0.605	0.4585	14	4	1	0	0	1	0	0	3	289.394	8.9092	25	1	1	1	0	0	1	0.217391	23	1	0	107.443	45	1	0	0	0	0	1	1	1
Nonaperone	ZINC000000001828	Organooxygen compounds	Carbonyl compounds	171	-5.06	-7.1438	-7.2	5.06	7.1438	7.2	1.83926	1.26672	0.326	0.095	0.08	0.488	0.3455	14	4	1	0	0	1	0	0	3	289.394	8.9092	25	1	1	1	0	0	1	0.217391	23	1	0	107.443	45	1	0	0	0	0	1	1	1
Nonaperone	ZINC000000001828	Organooxygen compounds	Carbonyl compounds	172	-4.87	-7.14861	-7.1	4.87	7.14861	7.1	1.95237	1.31172	0.429	0.094	0.101	0.542	0.4035	14	4	1	0	0	1	0	0	3	289.394	8.9092	25	1	1	1	0	0	1	0.217391	23	1	0	107.443	45	1	0	0	0	0	1	1	1
Cycrimine	ZINC000000000199	Organonitrogen compounds	Amines	173	-4.27	-6.75023	-6.3	4.27	6.75023	6.3	2.92958	1.87466	0.751	0.218	0.421	0.913	0.7495	19	0	1	0	0	1	0	0	4	287.447	9.0899	30	1	2	2	0	1	1	0.217391	23	1	0	118.539	50	0	0	0	0	0	0	1	1
Cycrimine	ZINC000000000199	Organonitrogen compounds	Amines	174	-4.76	-5.87465	-5.6	4.76	5.87465	5.6	2.9126	1.81076	0.49	0.687	0.81	0.909	0.7795	16	3	1	0	0	1	0	0	3	287.447	9.0899	30	1	2	2	0	1	1	0.217391	23	1	0	118.539	50	0	0	0	0	0	0	1	1
Cycrimine	ZINC000000000199	Organonitrogen compounds	Amines	175	-5.12	-6.75015	-6.5	5.12	6.75015	6.5	2.8365	1.89715	0.295	0.219	0.313	0.889	0.5965	19	0	1	0	0	1	0	0	4	287.447	9.0899	30	1	2	2	0	1	1	0.217391	23	1	0	118.539	50	0	0	0	0	0	0	1	1
Menthyl_salicylate	ZINC000003875617	Benzene and substituted derivatives	Benzoic acids and derivatives	176	-4.72	-7.10959	-7	4.72	7.10959	7	1.01284	0.494757	0.511	0.101	0.129	0.113	0.2165	12	5	0	0	0	3	0	0	2	276.376	7.9294	27	3	1	1	0	0	0	0.190476	21	0	0	106.6	44	0	0	0	0	0	0	0	3
Menthyl_salicylate	ZINC000003875617	Benzene and substituted derivatives	Benzoic acids and derivatives	177	-4.88	-6.65402	-6.5	4.88	6.65402	6.5	0.727501	0.105942	0.422	0.257	0.313	0.038	0.20275	12	5	0	0	0	3	0	0	2	276.376	7.9294	27	3	1	1	0	0	0	0.190476	21	0	0	106.6	44	0	0	0	0	0	0	0	3
Menthyl_salicylate	ZINC000003875617	Benzene and substituted derivatives	Benzoic acids and derivatives	178	-4.95	-7.12298	-7	4.95	7.12298	7	1.25359	0.810761	0.384	0.099	0.129	0.224	0.24025	12	5	0	0	0	3	0	0	2	276.376	7.9294	27	3	1	1	0	0	0	0.190476	21	0	0	106.6	44	0	0	0	0	0	0	0	3
Vedaprofen	ZINC000001842638	Naphthalenes	?	179	-3.97	-6.25155	-6.2	3.97	6.25155	6.2	1.26442	0.42605	0.868	0.463	0.474	0.229	0.45	16	3	0	0	0	2	0	0	3	281.375	8.5718	22	2	0	1	1	0	0	0.130435	23	0	0	107.441	42	0	0	0	0	0	0	0	2
Vedaprofen	ZINC000001842638	Naphthalenes	?	180	-3.71	-5.95764	-5.6	3.71	5.95764	5.6	1.84724	0.819944	0.932	0.632	0.81	0.492	0.6815	16	3	0	0	0	2	0	0	3	281.375	8.5718	22	2	0	1	1	0	0	0.130435	23	0	0	107.441	42	0	0	0	0	0	0	0	2
Vedaprofen	ZINC000001842638	Naphthalenes	?	181	-3.99	-6.24461	-6.1	3.99	6.24461	6.1	1.6493	0.703596	0.862	0.465	0.538	0.402	0.551	16	3	0	0	0	2	0	0	3	281.375	8.5718	22	2	0	1	1	0	0	0.130435	23	0	0	107.441	42	0	0	0	0	0	0	0	2
Tymazoline	ZINC000000002232	Prenol lipids	Monoterpenoids	182	-4.5	-6.09752	-6.1	4.5	6.09752	6.1	2.86384	0.918446	0.634	0.555	0.538	0.897	0.7415	9	5	2	0	0	1	0	0	2	232.327	6.4366	23	3	1	1	0	0	1	0.222222	18	1	0	87.2908	37	0	0	0	0	0	0	2	1
Tymazoline	ZINC000000002232	Prenol lipids	Monoterpenoids	183	-5.02	-5.89077	-5.9	5.02	5.89077	5.9	2.3065	1.51604	0.346	0.676	0.662	0.695	0.5995	9	5	2	0	0	1	0	0	2	232.327	6.4366	23	3	1	1	0	0	1	0.222222	18	1	0	87.2908	37	0	0	0	0	0	0	2	1
Tymazoline	ZINC000000002232	Prenol lipids	Monoterpenoids	184	-5.22	-6.08548	-6.1	5.22	6.08548	6.1	2.3876	1.64818	0.243	0.563	0.538	0.727	0.55875	9	5	2	0	0	1	0	0	2	232.327	6.4366	23	3	1	1	0	0	1	0.222222	18	1	0	87.2908	37	0	0	0	0	0	0	2	1
Isoprofen	ZINC000001846287	Indanes	?	185	-3.85	-6.46255	-6.5	3.85	6.46255	6.5	2.67419	1.88432	0.901	0.348	0.313	0.83	0.7185	9	6	0	0	0	2	0	0	2	231.315	7.1505	20	2	0	1	1	0	0	0.166667	18	0	0	87.9805	36	0	0	0	0	0	0	0	2
Isoprofen	ZINC000001846287	Indanes	?	186	-3.9	-6.44194	-6.5	3.9	6.44194	6.5	3.02995	2.11609	0.887	0.358	0.313	0.94	0.77	9	6	0	0	0	2	0	0	2	231.315	7.1505	20	2	0	1	1	0	0	0.166667	18	0	0	87.9805	36	0	0	0	0	0	0	0	2
Isoprofen	ZINC000001846287	Indanes	?	187	-4.18	-6.44221	-6.4	4.18	6.44221	6.4	3.24485	1.78228	0.789	0.358	0.362	0.975	0.77525	9	6	0	0	0	2	0	0	2	231.315	7.1505	20	2	0	1	1	0	0	0.166667	18	0	0	87.9805	36	0	0	0	0	0	0	0	2
Fenoprofen	ZINC000000402909	Benzene and substituted derivatives	Diphenylethers	188	-3.7	-7.00882	-7	3.7	7.00882	7	2.29307	0.821985	0.934	0.126	0.129	0.691	0.61125	12	3	0	0	0	3	0	0	2	241.266	5.7302	15	3	0	1	1	0	0	0.210526	19	0	0	81.1085	31	0	0	0	0	0	0	0	3
Fenoprofen	ZINC000000402909	Benzene and substituted derivatives	Diphenylethers	189	-4.23	-5.95634	-5.9	4.23	5.95634	5.9	2.09668	1.41099	0.768	0.634	0.662	0.611	0.663	12	3	0	0	0	3	0	0	2	241.266	5.7302	15	3	0	1	1	0	0	0.210526	19	0	0	81.1085	31	0	0	0	0	0	0	0	3
Fenoprofen	ZINC000000402909	Benzene and substituted derivatives	Diphenylethers	190	-4.23	-6.42075	-6.4	4.23	6.42075	6.4	1.94138	1.28898	0.768	0.369	0.362	0.538	0.5515	12	3	0	0	0	3	0	0	2	241.266	5.7302	15	3	0	1	1	0	0	0.210526	19	0	0	81.1085	31	0	0	0	0	0	0	0	3
Metrafazoline	ZINC000000001725	Tetralins	?	191	-5.42	-6.68395	-6.7	5.42	6.68395	6.7	1.46873	1.02164	0.169	0.243	0.229	0.328	0.2635	15	2	2	0	0	0	0	0	4	254.377	7.5627	24	2	1	1	0	0	1	0.0909091	22	1	0	98.2308	41	0	0	0	0	0	0	2	0
Bucloxic-acid	ZINC000000001067	Organooxygen compounds	Carbonyl compounds	192	-4.79	-5.75852	-5.6	4.79	5.75852	5.6	2.09359	0.920043	0.474	0.745	0.81	0.61	0.626	12	4	0	0	0	3	0	0	2	293.77	7.5376	20	3	0	1	1	0	0	0.238095	21	0	0	97.003	38	1	0	0	1	0	0	0	3
Bucloxic-acid	ZINC000000001067	Organooxygen compounds	Carbonyl compounds	193	-4.86	-6.98092	-6.9	4.86	6.98092	6.9	2.46148	1.25989	0.435	0.138	0.158	0.755	0.52575	12	4	0	0	0	3	0	0	2	293.77	7.5376	20	3	0	1	1	0	0	0.238095	21	0	0	97.003	38	1	0	0	1	0	0	0	3
Bucloxic-acid	ZINC000000001067	Organooxygen compounds	Carbonyl compounds	194	-5.07	-6.96335	-6.9	5.07	6.96335	6.9	2.27449	1.54583	0.32	0.142	0.158	0.686	0.4625	12	4	0	0	0	3	0	0	2	293.77	7.5376	20	3	0	1	1	0	0	0.238095	21	0	0	97.003	38	1	0	0	1	0	0	0	3
Carbaril	ZINC000000001090	Naphthalenes	?	195	-4.45	-6.09323	-6.1	4.45	6.09323	6.1	1.70501	1.18023	0.658	0.557	0.538	0.43	0.514	10	2	0	1	0	2	0	0	2	201.225	4.8114	14	3	1	1	0	0	0	0.1875	16	0	0	70.1704	26	0	0	0	0	0	0	1	2
Carbaril	ZINC000000001090	Naphthalenes	?	196	-4.4	-6.21352	-6.2	4.4	6.21352	6.2	1.12303	0.646237	0.688	0.487	0.474	0.161	0.371	10	2	0	1	0	2	0	0	2	201.225	4.8114	14	3	1	1	0	0	0	0.1875	16	0	0	70.1704	26	0	0	0	0	0	0	1	2
Carbaril	ZINC000000001090	Naphthalenes	?	197	-4.43	-6.10553	-6.1	4.43	6.10553	6.1	0.539768	0.362204	0.669	0.551	0.538	0.015	0.30925	10	2	0	1	0	2	0	0	2	201.225	4.8114	14	3	1	1	0	0	0	0.1875	16	0	0	70.1704	26	0	0	0	0	0	0	1	2
Inaperisone	ZINC000002016043	Organooxygen compounds	Carbonyl compounds	198	-4.53	-6.50757	-6.5	4.53	6.50757	6.5	1.42047	0.144234	0.62	0.323	0.313	0.305	0.38575	10	6	1	0	0	1	0	0	2	245.366	7.9494	24	1	1	1	0	0	1	0.263158	19	1	0	99.0874	41	0	0	0	0	0	0	1	1
Inaperisone	ZINC000002016043	Organooxygen compounds	Carbonyl compounds	199	-5.4	-6.12477	-6.2	5.4	6.12477	6.2	1.27498	0.879412	0.176	0.539	0.474	0.235	0.28	10	6	1	0	0	1	0	0	2	245.366	7.9494	24	1	1	1	0	0	1	0.263158	19	1	0	99.0874	41	0	0	0	0	0	0	1	1
Inaperisone	ZINC000002016043	Organooxygen compounds	Carbonyl compounds	200	-4.32	-6.14157	-6.2	4.32	6.14157	6.2	1.35554	0.242374	0.729	0.53	0.474	0.274	0.43775	10	6	1	0	0	1	0	0	2	245.366	7.9494	24	1	1	1	0	0	1	0.263158	19	1	0	99.0874	41	0	0	0	0	0	0	1	1
Naproxol	ZINC000002013137	Naphthalenes	?	201	-4.05	-6.98059	-6.8	4.05	6.98059	6.8	0.487812	0.148164	0.839	0.139	0.194	0.011	0.26375	10	4	0	0	0	2	0	0	2	216.28	5.5243	18	2	1	1	0	1	0	0.176471	17	0	0	83.4318	32	0	0	0	0	0	0	0	2
Naproxol	ZINC000002013137	Naphthalenes	?	202	-4.42	-6.95348	-6.8	4.42	6.95348	6.8	3.22198	2.03646	0.677	0.145	0.194	0.972	0.70375	10	4	0	0	0	2	0	0	2	216.28	5.5243	18	2	1	1	0	1	0	0.176471	17	0	0	83.4318	32	0	0	0	0	0	0	0	2
Naproxol	ZINC000002013137	Naphthalenes	?	203	-4.01	-6.65389	-6.5	4.01	6.65389	6.5	3.07154	1.65734	0.856	0.258	0.313	0.95	0.76725	10	4	0	0	0	2	0	0	2	216.28	5.5243	18	2	1	1	0	1	0	0.176471	17	0	0	83.4318	32	0	0	0	0	0	0	0	2
Metapramine	ZINC000004626658	Benzazepines	Dibenzazepines	204	-4.68	-5.16775	-5.2	4.68	5.16775	5.2	1.29505	0.914633	0.533	0.942	0.933	0.245	0.489	14	2	1	1	0	0	0	0	3	238.334	7.2307	19	0	1	0	0	0	1	0.05	20	1	0	93.3033	36	0	0	0	0	0	0	2	0
Metapramine	ZINC000004626658	Benzazepines	Dibenzazepines	205	-4.16	-5.18422	-5.2	4.16	5.18422	5.2	2.45788	1.73576	0.798	0.939	0.933	0.753	0.80925	14	2	1	1	0	0	0	0	3	238.334	7.2307	19	0	1	0	0	0	1	0.05	20	1	0	93.3033	36	0	0	0	0	0	0	2	0
Metapramine	ZINC000004626658	Benzazepines	Dibenzazepines	206	-4.69	-5.41234	-5.4	4.69	5.41234	5.4	3.61653	2.53374	0.528	0.888	0.888	0.995	0.8515	14	2	1	1	0	0	0	0	3	238.334	7.2307	19	0	1	0	0	0	1	0.05	20	1	0	93.3033	36	0	0	0	0	0	0	2	0
Napamezole	ZINC000000001780	Naphthalenes	?	207	-4.45	-6.98235	-7	4.45	6.98235	7	1.24387	0.860135	0.658	0.138	0.129	0.219	0.30625	13	1	2	0	0	0	0	0	3	212.296	5.476	18	2	1	1	0	0	1	0.111111	18	1	0	79.5818	32	0	0	0	0	0	0	2	0
Napamezole	ZINC000000001780	Naphthalenes	?	208	-5.07	-6.45633	-6.4	5.07	6.45633	6.4	1.11846	0.752622	0.32	0.35	0.362	0.159	0.25	13	1	2	0	0	0	0	0	3	212.296	5.476	18	2	1	1	0	0	1	0.111111	18	1	0	79.5818	32	0	0	0	0	0	0	2	0
Napamezole	ZINC000000001780	Naphthalenes	?	209	-5.01	-6.44016	-6.5	5.01	6.44016	6.5	1.06157	0.707192	0.352	0.36	0.313	0.134	0.23325	13	1	2	0	0	0	0	0	3	212.296	5.476	18	2	1	1	0	0	1	0.111111	18	1	0	79.5818	32	0	0	0	0	0	0	2	0
Fenoprofen	ZINC000000402909	Benzene and substituted derivatives	Diphenylethers	210	-3.77	-7.12575	-7.1	3.77	7.12575	7.1	2.10084	0.96201	0.919	0.099	0.101	0.614	0.562	12	3	0	0	0	3	0	0	2	241.266	5.7302	15	3	0	1	1	0	0	0.210526	19	0	0	81.1085	31	0	0	0	0	0	0	0	3
Fenoprofen	ZINC000000402909	Benzene and substituted derivatives	Diphenylethers	211	-3.98	-6.99921	-7	3.98	6.99921	7	2.33104	1.15016	0.865	0.131	0.129	0.704	0.6005	12	3	0	0	0	3	0	0	2	241.266	5.7302	15	3	0	1	1	0	0	0.210526	19	0	0	81.1085	31	0	0	0	0	0	0	0	3
Fenoprofen	ZINC000000402909	Benzene and substituted derivatives	Diphenylethers	212	-3.75	-7.00677	-7	3.75	7.00677	7	2.19131	1.51321	0.925	0.127	0.129	0.654	0.5905	12	3	0	0	0	3	0	0	2	241.266	5.7302	15	3	0	1	1	0	0	0.210526	19	0	0	81.1085	31	0	0	0	0	0	0	0	3
Crilvastatin	ZINC000003775270	Carboxylic acids and derivatives	Amino acids, peptides, and analogues	213	-4.08	-6.26744	-6.2	4.08	6.26744	6.2	1.45014	0.905065	0.829	0.452	0.474	0.318	0.48475	10	4	1	0	0	3	0	0	2	253.342	6.8922	27	4	1	1	0	0	0	0.157895	19	1	0	91.2076	41	0	0	0	0	0	0	1	3
Crilvastatin	ZINC000003775270	Carboxylic acids and derivatives	Amino acids, peptides, and analogues	214	-4.55	-6.36904	-6.5	4.55	6.36904	6.5	0.968101	0.63497	0.608	0.397	0.313	0.096	0.27825	10	4	1	0	0	3	0	0	2	253.342	6.8922	27	4	1	1	0	0	0	0.157895	19	1	0	91.2076	41	0	0	0	0	0	0	1	3
Crilvastatin	ZINC000003775270	Carboxylic acids and derivatives	Amino acids, peptides, and analogues	215	-4.01	-5.78293	-5.8	4.01	5.78293	5.8	1.05991	0.722698	0.856	0.732	0.715	0.132	0.45875	10	4	1	0	0	3	0	0	2	253.342	6.8922	27	4	1	1	0	0	0	0.157895	19	1	0	91.2076	41	0	0	0	0	0	0	1	3
Fluindione	ZINC000100091724	Indanes	Indanones	216	-4.38	-7.80766	-7.8	4.38	7.80766	7.8	1.09483	0.757636	0.698	0.014	0.012	0.151	0.253	15	0	0	0	0	2	0	0	3	240.233	4.191	11	2	0	0	0	0	0	0.05	20	0	0	73.868	27	1	0	0	0	0	1	0	2
Fluindione	ZINC000100091724	Indanes	Indanones	217	-4.42	-7.133	-7	4.42	7.133	7	1.42715	0.944153	0.677	0.097	0.129	0.308	0.3555	15	0	0	0	0	2	0	0	3	240.233	4.191	11	2	0	0	0	0	0	0.05	20	0	0	73.868	27	1	0	0	0	0	1	0	2
Mexoprofen	ZINC000038418475	Phenylpropanoic acids	?	218	-3.72	-5.97303	-6	3.72	5.97303	6	1.39893	0.190784	0.93	0.624	0.6	0.295	0.53	12	4	0	0	0	2	0	0	2	245.342	7.8794	22	2	0	1	1	0	0	0.157895	19	0	0	94.7425	39	0	0	0	0	0	0	0	2
Mexoprofen	ZINC000038418475	Phenylpropanoic acids	?	219	-3.55	-6.74897	-6.4	3.55	6.74897	6.4	1.31376	0.89235	0.96	0.219	0.362	0.252	0.4565	12	4	0	0	0	2	0	0	2	245.342	7.8794	22	2	0	1	1	0	0	0.157895	19	0	0	94.7425	39	0	0	0	0	0	0	0	2
Mexoprofen	ZINC000038418475	Phenylpropanoic acids	?	220	-3.65	-6.31935	-6.3	3.65	6.31935	6.3	1.00327	0.676691	0.944	0.423	0.421	0.108	0.39525	12	4	0	0	0	2	0	0	2	245.342	7.8794	22	2	0	1	1	0	0	0.157895	19	0	0	94.7425	39	0	0	0	0	0	0	0	2
Cypenamine	ZINC000002037168	Organonitrogen compounds	Amines	221	-3.23	-5.9527	-5.9	3.23	5.9527	5.9	1.41252	0.119477	0.986	0.637	0.662	0.301	0.5625	11	0	0	1	0	0	0	0	2	161.248	5.7366	15	0	1	0	0	0	0	0.0769231	13	0	0	68.1535	27	0	0	0	0	0	0	1	0
Cypenamine	ZINC000002037168	Organonitrogen compounds	Amines	222	-3.42	-6.00711	-5.8	3.42	6.00711	5.8	1.23425	0.368312	0.975	0.604	0.715	0.216	0.5305	11	0	0	1	0	0	0	0	2	161.248	5.7366	15	0	1	0	0	0	0	0.0769231	13	0	0	68.1535	27	0	0	0	0	0	0	1	0
Cypenamine	ZINC000002037168	Organonitrogen compounds	Amines	223	-3.5	-5.99759	-5.8	3.5	5.99759	5.8	1.31006	0.568804	0.967	0.61	0.715	0.25	0.5455	11	0	0	1	0	0	0	0	2	161.248	5.7366	15	0	1	0	0	0	0	0.0769231	13	0	0	68.1535	27	0	0	0	0	0	0	1	0
Tibenzate	ZINC000000002162	Benzene and substituted derivatives	Benzoic acids and derivatives	224	-4.44	-6.58923	-6.6	4.44	6.58923	6.6	2.09379	0.642654	0.664	0.284	0.268	0.61	0.538	12	2	0	0	0	1	0	1	2	228.316	5.5026	14	2	0	0	0	0	0	0.235294	17	0	0	81.3985	28	0	0	0	0	0	0	0	1
Tibenzate	ZINC000000002162	Benzene and substituted derivatives	Benzoic acids and derivatives	225	-4.54	-6.69174	-6.6	4.54	6.69174	6.6	1.82515	0.81623	0.614	0.24	0.268	0.481	0.461	12	2	0	0	0	1	0	1	2	228.316	5.5026	14	2	0	0	0	0	0	0.235294	17	0	0	81.3985	28	0	0	0	0	0	0	0	1
Tibenzate	ZINC000000002162	Benzene and substituted derivatives	Benzoic acids and derivatives	226	-4.76	-6.58038	-6.3	4.76	6.58038	6.3	1.7199	1.16961	0.49	0.287	0.421	0.438	0.44675	12	2	0	0	0	1	0	1	2	228.316	5.5026	14	2	0	0	0	0	0	0.235294	17	0	0	81.3985	28	0	0	0	0	0	0	0	1
Methaqualone	ZINC000002568176	Diazanaphthalenes	Benzodiazines	227	-4.03	-5.82033	-5.8	4.03	5.82033	5.8	1.19355	0.785023	0.847	0.716	0.715	0.195	0.488	14	2	2	0	0	1	0	0	3	250.301	4.9851	16	3	0	0	0	0	0	0.047619	21	1	0	92.07	33	0	0	0	0	0	0	2	1
Methaqualone	ZINC000002568176	Diazanaphthalenes	Benzodiazines	228	-4.31	-6.93288	-7	4.31	6.93288	7	1.04986	0.727471	0.734	0.151	0.129	0.128	0.27975	14	2	2	0	0	1	0	0	3	250.301	4.9851	16	3	0	0	0	0	0	0.047619	21	1	0	92.07	33	0	0	0	0	0	0	2	1
Methaqualone	ZINC000002568176	Diazanaphthalenes	Benzodiazines	229	-4.25	-5.7866	-5.8	4.25	5.7866	5.8	1.67733	1.08925	0.761	0.731	0.715	0.417	0.5775	14	2	2	0	0	1	0	0	3	250.301	4.9851	16	3	0	0	0	0	0	0.047619	21	1	0	92.07	33	0	0	0	0	0	0	2	1
Raluridine	ZINC000001851238	Pyrimidine nucleosides	Pyrimidine 2,3-dideoxyribonucleosides	230	-5.41	-5.75003	-5.6	5.41	5.75003	5.6	1.44919	0.996196	0.173	0.748	0.81	0.318	0.40475	8	1	2	0	1	3	0	0	2	264.64	2.1627	14	5	2	2	0	1	0	0.111111	18	2	0	67.8202	27	2	0	0	1	0	1	2	4
Raluridine	ZINC000001851238	Pyrimidine nucleosides	Pyrimidine 2,3-dideoxyribonucleosides	231	-5.12	-6.09023	-6	5.12	6.09023	6	1.25639	0.656154	0.295	0.559	0.6	0.226	0.33675	8	1	2	0	1	3	0	0	2	264.64	2.1627	14	5	2	2	0	1	0	0.111111	18	2	0	67.8202	27	2	0	0	1	0	1	2	4
Raluridine	ZINC000001851238	Pyrimidine nucleosides	Pyrimidine 2,3-dideoxyribonucleosides	232	-5.62	-6.09814	-6	5.62	6.09814	6	1.4999	0.857873	0.107	0.555	0.6	0.34	0.34675	8	1	2	0	1	3	0	0	2	264.64	2.1627	14	5	2	2	0	1	0	0.111111	18	2	0	67.8202	27	2	0	0	1	0	1	2	4
Eperisone	ZINC000001846199	Organooxygen compounds	Carbonyl compounds	233	-4.74	-5.79324	-5.8	4.74	5.79324	5.8	0.835074	0.283017	0.499	0.729	0.715	0.061	0.334	11	6	1	0	0	1	0	0	2	259.393	8.6562	26	1	1	1	0	0	1	0.25	20	1	0	106.008	44	0	0	0	0	0	0	1	1
Eperisone	ZINC000001846199	Organooxygen compounds	Carbonyl compounds	234	-5.24	-6.47304	-6.5	5.24	6.47304	6.5	1.07098	0.224017	0.233	0.342	0.313	0.138	0.2055	11	6	1	0	0	1	0	0	2	259.393	8.6562	26	1	1	1	0	0	1	0.25	20	1	0	106.008	44	0	0	0	0	0	0	1	1
Eperisone	ZINC000001846199	Organooxygen compounds	Carbonyl compounds	235	-4.96	-6.00474	-6.3	4.96	6.00474	6.3	1.29852	0.331732	0.378	0.606	0.421	0.245	0.32225	11	6	1	0	0	1	0	0	2	259.393	8.6562	26	1	1	1	0	0	1	0.25	20	1	0	106.008	44	0	0	0	0	0	0	1	1
Pronetalol	ZINC000000967921	Naphthalenes	?	236	-4.53	-6.78135	-6.7	4.53	6.78135	6.7	1.53519	0.950618	0.62	0.207	0.229	0.356	0.39025	10	5	0	1	0	1	0	0	2	229.323	6.3747	20	1	2	1	0	1	1	0.222222	18	0	0	93.6899	36	0	0	0	0	0	0	1	1
Pronetalol	ZINC000000967921	Naphthalenes	?	237	-4.77	-6.92589	-6.8	4.77	6.92589	6.8	1.51089	0.803356	0.483	0.155	0.194	0.346	0.34225	10	5	0	1	0	1	0	0	2	229.323	6.3747	20	1	2	1	0	1	1	0.222222	18	0	0	93.6899	36	0	0	0	0	0	0	1	1
Pronetalol	ZINC000000967921	Naphthalenes	?	238	-4.79	-6.86173	-6.8	4.79	6.86173	6.8	1.39579	0.818758	0.474	0.176	0.194	0.294	0.314	10	5	0	1	0	1	0	0	2	229.323	6.3747	20	1	2	1	0	1	1	0.222222	18	0	0	93.6899	36	0	0	0	0	0	0	1	1
Cyclandelate	ZINC000008551998	Benzene and substituted derivatives	?	239	-4.04	-6.60486	-6.5	4.04	6.60486	6.5	1.79613	1.13001	0.844	0.276	0.313	0.468	0.52325	12	5	0	0	0	3	0	0	2	276.376	7.1937	27	3	1	1	0	1	0	0.190476	21	0	0	105.257	44	0	0	0	0	0	0	0	3
Cyclandelate	ZINC000008551998	Benzene and substituted derivatives	?	240	-4.73	-6.62762	-6.8	4.73	6.62762	6.8	1.8282	1.1257	0.505	0.267	0.194	0.482	0.41575	12	5	0	0	0	3	0	0	2	276.376	7.1937	27	3	1	1	0	1	0	0.190476	21	0	0	105.257	44	0	0	0	0	0	0	0	3
Cyclandelate	ZINC000008551998	Benzene and substituted derivatives	?	241	-4.84	-6.57481	-6.5	4.84	6.57481	6.5	1.79259	1.21035	0.446	0.289	0.313	0.466	0.42275	12	5	0	0	0	3	0	0	2	276.376	7.1937	27	3	1	1	0	1	0	0.190476	21	0	0	105.257	44	0	0	0	0	0	0	0	3
Prolintane	ZINC000001481908	Benzene and substituted derivatives	Phenethylamines	242	-3.87	-5.79408	-5.8	3.87	5.79408	5.8	1.90389	1.31236	0.896	0.728	0.715	0.523	0.66425	10	5	1	0	0	0	0	0	2	217.356	8.1369	23	0	1	1	0	0	1	0.294118	17	1	0	93.6999	39	0	0	0	0	0	0	1	0
Prolintane	ZINC000001481908	Benzene and substituted derivatives	Phenethylamines	243	-3.81	-5.90293	-5.9	3.81	5.90293	5.9	2.55591	1.72959	0.912	0.669	0.662	0.785	0.786	10	5	1	0	0	0	0	0	2	217.356	8.1369	23	0	1	1	0	0	1	0.294118	17	1	0	93.6999	39	0	0	0	0	0	0	1	0
Prolintane	ZINC000001481908	Benzene and substituted derivatives	Phenethylamines	244	-4.01	-5.91412	-5.9	4.01	5.91412	5.9	2.85085	1.196	0.856	0.664	0.662	0.893	0.826	10	5	1	0	0	0	0	0	2	217.356	8.1369	23	0	1	1	0	0	1	0.294118	17	1	0	93.6999	39	0	0	0	0	0	0	1	0
Dexibuprofen	ZINC000000113398	Phenylpropanoic acids	?	245	-3.65	-5.9515	-6	3.65	5.9515	6	0.976119	0.174199	0.944	0.637	0.6	0.098	0.435	6	7	0	0	0	2	0	0	1	205.277	6.251	18	2	0	1	1	0	0	0.266667	15	0	0	78.2075	32	0	0	0	0	0	0	0	2
Dexibuprofen	ZINC000000113398	Phenylpropanoic acids	?	246	-3.4	-5.94952	-6	3.4	5.94952	6	0.846577	0.532777	0.978	0.638	0.6	0.064	0.4265	6	7	0	0	0	2	0	0	1	205.277	6.251	18	2	0	1	1	0	0	0.266667	15	0	0	78.2075	32	0	0	0	0	0	0	0	2
Dexibuprofen	ZINC000000113398	Phenylpropanoic acids	?	247	-3.37	-5.9375	-6	3.37	5.9375	6	0.542571	0.285422	0.981	0.645	0.6	0.016	0.40325	6	7	0	0	0	2	0	0	1	205.277	6.251	18	2	0	1	1	0	0	0.266667	15	0	0	78.2075	32	0	0	0	0	0	0	0	2
Naphazoline	ZINC000000119717	Naphthalenes	?	248	-4.58	-5.93726	-5.9	4.58	5.93726	5.9	2.35248	0.5221	0.587	0.646	0.662	0.713	0.66875	13	1	2	0	0	0	0	0	3	210.28	5.0646	16	2	1	1	0	0	1	0.111111	18	1	0	77.3828	30	0	0	0	0	0	0	2	0
Naphazoline	ZINC000000119717	Naphthalenes	?	249	-4.4	-6.60732	-6.6	4.4	6.60732	6.6	1.17177	0.807663	0.688	0.274	0.268	0.185	0.3315	13	1	2	0	0	0	0	0	3	210.28	5.0646	16	2	1	1	0	0	1	0.111111	18	1	0	77.3828	30	0	0	0	0	0	0	2	0
Naphazoline	ZINC000000119717	Naphthalenes	?	250	-4.43	-6.60919	-6.6	4.43	6.60919	6.6	1.43872	1.01191	0.669	0.273	0.268	0.313	0.39075	13	1	2	0	0	0	0	0	3	210.28	5.0646	16	2	1	1	0	0	1	0.111111	18	1	0	77.3828	30	0	0	0	0	0	0	2	0
Alminoprofen	ZINC000001999253	Phenylpropanoic acids	?	251	-4.35	-6.04498	-6	4.35	6.04498	6	1.90059	0.561851	0.713	0.585	0.6	0.521	0.58875	6	7	0	1	0	2	0	0	1	218.276	5.9481	18	3	1	2	1	0	0	0.3125	16	0	0	80.9219	32	0	0	0	0	0	0	1	2
Alminoprofen	ZINC000001999253	Phenylpropanoic acids	?	252	-4.5	-6.07867	-6	4.5	6.07867	6	1.61558	1.11703	0.634	0.566	0.6	0.389	0.503	6	7	0	1	0	2	0	0	1	218.276	5.9481	18	3	1	2	1	0	0	0.3125	16	0	0	80.9219	32	0	0	0	0	0	0	1	2
Alminoprofen	ZINC000001999253	Phenylpropanoic acids	?	253	-4.75	-5.90197	-5.9	4.75	5.90197	5.9	0.904645	0.129149	0.495	0.67	0.662	0.079	0.32875	6	7	0	1	0	2	0	0	1	218.276	5.9481	18	3	1	2	1	0	0	0.3125	16	0	0	80.9219	32	0	0	0	0	0	0	1	2
Mecloqualone	ZINC000000001656	Diazanaphthalenes	Benzodiazines	254	-4.41	-6.89372	-6.9	4.41	6.89372	6.9	0.36726	0.176064	0.682	0.165	0.158	0.003	0.2115	14	1	2	0	0	1	0	0	3	270.719	4.8308	13	3	0	0	0	0	0	0.047619	21	1	0	88.943	30	1	0	0	1	0	0	2	1
Mecloqualone	ZINC000000001656	Diazanaphthalenes	Benzodiazines	255	-4.38	-6.8517	-6.9	4.38	6.8517	6.9	1.73946	1.14908	0.698	0.178	0.158	0.446	0.437	14	1	2	0	0	1	0	0	3	270.719	4.8308	13	3	0	0	0	0	0	0.047619	21	1	0	88.943	30	1	0	0	1	0	0	2	1
Mecloqualone	ZINC000000001656	Diazanaphthalenes	Benzodiazines	256	-4.41	-6.9058	-6.9	4.41	6.9058	6.9	0.366493	0.180363	0.682	0.16	0.158	0.003	0.2115	14	1	2	0	0	1	0	0	3	270.719	4.8308	13	3	0	0	0	0	0	0.047619	21	1	0	88.943	30	1	0	0	1	0	0	2	1
Enfenamic-acid	ZINC000000001355	Benzene and substituted derivatives	Benzoic acids and derivatives	257	-4.86	-7.09257	-7.1	4.86	7.09257	7.1	0.679733	0.146335	0.435	0.104	0.101	0.032	0.15	12	3	0	1	0	2	0	0	2	240.282	5.9083	16	3	1	2	1	0	0	0.263158	19	0	0	84.7624	32	0	0	0	0	0	0	1	2
Enfenamic-acid	ZINC000000001355	Benzene and substituted derivatives	Benzoic acids and derivatives	258	-4.82	-7.06178	-7.1	4.82	7.06178	7.1	1.33871	0.247405	0.456	0.113	0.101	0.263	0.27075	12	3	0	1	0	2	0	0	2	240.282	5.9083	16	3	1	2	1	0	0	0.263158	19	0	0	84.7624	32	0	0	0	0	0	0	1	2
Enfenamic-acid	ZINC000000001355	Benzene and substituted derivatives	Benzoic acids and derivatives	259	-5.03	-7.09242	-7.1	5.03	7.09242	7.1	0.382102	0.119726	0.342	0.104	0.101	0.004	0.11275	12	3	0	1	0	2	0	0	2	240.282	5.9083	16	3	1	2	1	0	0	0.263158	19	0	0	84.7624	32	0	0	0	0	0	0	1	2
Procyclidine	ZINC000000057455	Organonitrogen compounds	Amines	260	-4.31	-6.20693	-6.3	4.31	6.20693	6.3	2.71263	1.90624	0.734	0.491	0.421	0.841	0.70925	16	3	1	0	0	1	0	0	3	287.447	9.0899	30	1	2	2	0	1	1	0.217391	23	1	0	118.539	50	0	0	0	0	0	0	1	1
Procyclidine	ZINC000000057455	Organonitrogen compounds	Amines	261	-5.3	-6.22093	-6.3	5.3	6.22093	6.3	2.52157	1.52539	0.208	0.48	0.421	0.774	0.54425	16	3	1	0	0	1	0	0	3	287.447	9.0899	30	1	2	2	0	1	1	0.217391	23	1	0	118.539	50	0	0	0	0	0	0	1	1
Procyclidine	ZINC000000057455	Organonitrogen compounds	Amines	262	-4.61	-6.67721	-6.5	4.61	6.67721	6.5	2.60547	1.81857	0.569	0.246	0.313	0.806	0.6235	19	0	1	0	0	1	0	0	4	287.447	9.0899	30	1	2	2	0	1	1	0.217391	23	1	0	118.539	50	0	0	0	0	0	0	1	1
Meradimate	ZINC000003999653	Prenol lipids	Monoterpenoids	263	-4.17	-6.75222	-6.7	4.17	6.75222	6.7	0.947715	0.618648	0.794	0.217	0.229	0.091	0.30125	12	5	0	1	0	2	0	0	2	275.392	9.2135	28	3	1	0	0	0	0	0.190476	21	0	0	109.511	45	0	0	0	0	0	0	1	2
Meradimate	ZINC000003999653	Prenol lipids	Monoterpenoids	264	-4.82	-6.74871	-6.6	4.82	6.74871	6.6	1.31047	0.873601	0.456	0.22	0.268	0.25	0.306	12	5	0	1	0	2	0	0	2	275.392	9.2135	28	3	1	0	0	0	0	0.190476	21	0	0	109.511	45	0	0	0	0	0	0	1	2
Meradimate	ZINC000003999653	Prenol lipids	Monoterpenoids	265	-4.69	-6.76021	-6.6	4.69	6.76021	6.6	1.07457	0.456604	0.528	0.213	0.268	0.14	0.269	12	5	0	1	0	2	0	0	2	275.392	9.2135	28	3	1	0	0	0	0	0.190476	21	0	0	109.511	45	0	0	0	0	0	0	1	2
Fenharmane	ZINC000040163092	Piperidines	Benzylpiperidines	266	-5.54	-7.04237	-7	5.54	7.04237	7	2.06361	1.45457	0.13	0.117	0.129	0.597	0.36325	17	1	2	0	0	0	0	0	4	262.356	6.5016	19	1	1	0	0	0	1	0.0869565	23	2	0	97.8735	38	0	0	0	0	0	0	2	0
Fenharmane	ZINC000040163092	Piperidines	Benzylpiperidines	267	-4.47	-7.15626	-7.1	4.47	7.15626	7.1	1.40845	0.943684	0.648	0.092	0.101	0.299	0.33675	17	1	2	0	0	0	0	0	4	262.356	6.5016	19	1	1	0	0	0	1	0.0869565	23	2	0	97.8735	38	0	0	0	0	0	0	2	0
Fenharmane	ZINC000040163092	Piperidines	Benzylpiperidines	268	-4.89	-7.17665	-7.1	4.89	7.17665	7.1	0.945583	0.582918	0.418	0.089	0.101	0.091	0.17525	17	1	2	0	0	0	0	0	4	262.356	6.5016	19	1	1	0	0	0	1	0.0869565	23	2	0	97.8735	38	0	0	0	0	0	0	2	0
Piperidolate	ZINC000000057474	Benzene and substituted derivatives	Diphenylmethanes	269	-5.35	-6.43076	-6.5	5.35	6.43076	6.5	3.17607	1.56801	0.191	0.365	0.313	0.967	0.6095	17	4	1	0	0	2	0	0	3	323.436	8.8413	27	2	1	1	0	0	1	0.230769	26	1	0	121.586	49	0	0	0	0	0	0	1	2
Piperidolate	ZINC000000057474	Benzene and substituted derivatives	Diphenylmethanes	270	-3.57	-6.39004	-6.5	3.57	6.39004	6.5	2.91795	1.94481	0.957	0.385	0.313	0.91	0.7725	17	4	1	0	0	2	0	0	3	323.436	8.8413	27	2	1	1	0	0	1	0.230769	26	1	0	121.586	49	0	0	0	0	0	0	1	2
Piperidolate	ZINC000000057474	Benzene and substituted derivatives	Diphenylmethanes	271	-5.57	-6.49694	-6.5	5.57	6.49694	6.5	2.66283	1.1644	0.12	0.328	0.313	0.826	0.52125	17	4	1	0	0	2	0	0	3	323.436	8.8413	27	2	1	1	0	0	1	0.230769	26	1	0	121.586	49	0	0	0	0	0	0	1	2
Procyclidine	ZINC000000057455	Organonitrogen compounds	Amines	272	-5	-6.54938	-6.4	5	6.54938	6.4	2.39917	1.63055	0.359	0.301	0.362	0.731	0.54575	16	3	1	0	0	1	0	0	3	287.447	9.0899	30	1	2	2	0	1	1	0.217391	23	1	0	118.539	50	0	0	0	0	0	0	1	1
Procyclidine	ZINC000000057455	Organonitrogen compounds	Amines	273	-4.85	-6.3858	-6.3	4.85	6.3858	6.3	2.55893	1.58642	0.44	0.387	0.421	0.787	0.60875	16	3	1	0	0	1	0	0	3	287.447	9.0899	30	1	2	2	0	1	1	0.217391	23	1	0	118.539	50	0	0	0	0	0	0	1	1
Procyclidine	ZINC000000057455	Organonitrogen compounds	Amines	274	-4.15	-6.56578	-6.6	4.15	6.56578	6.6	2.61223	1.54563	0.803	0.292	0.268	0.808	0.67175	16	3	1	0	0	1	0	0	3	287.447	9.0899	30	1	2	2	0	1	1	0.217391	23	1	0	118.539	50	0	0	0	0	0	0	1	1
Liarozole	ZINC000011687637	Benzimidazoles	?	275	-5.17	-6.47574	-6.5	5.17	6.47574	6.5	1.9533	1.15834	0.269	0.341	0.313	0.542	0.4165	16	1	4	0	0	0	0	0	4	308.772	5.8362	15	3	1	1	0	0	0	0.12	25	2	0	100.771	35	1	0	0	1	0	0	4	0
Liarozole	ZINC000011687637	Benzimidazoles	?	276	-4.86	-6.12213	-6.1	4.86	6.12213	6.1	1.94743	1.37096	0.435	0.541	0.538	0.54	0.51325	16	1	4	0	0	0	0	0	4	308.772	5.8362	15	3	1	1	0	0	0	0.12	25	2	0	100.771	35	1	0	0	1	0	0	4	0
Liarozole	ZINC000011687637	Benzimidazoles	?	277	-5.64	-5.7649	-5.5	5.64	5.7649	5.5	2.32551	1.62372	0.104	0.741	0.852	0.702	0.59	16	1	4	0	0	0	0	0	4	308.772	5.8362	15	3	1	1	0	0	0	0.12	25	2	0	100.771	35	1	0	0	1	0	0	4	0
Fluminorex	ZINC000002036974	Benzene and substituted derivatives	Trifluoromethylbenzenes	278	-5.06	-6.88862	-6.7	5.06	6.88862	6.7	1.18854	0.500264	0.326	0.167	0.229	0.192	0.23475	9	1	1	1	1	0	0	0	2	230.189	4.0305	12	3	1	0	0	0	1	0.117647	17	1	0	57.903	25	3	0	0	0	0	3	2	1
Fluminorex	ZINC000002036974	Benzene and substituted derivatives	Trifluoromethylbenzenes	279	-4.55	-7.01768	-6.8	4.55	7.01768	6.8	1.03209	0.0777404	0.608	0.124	0.194	0.12	0.2605	9	1	1	1	1	0	0	0	2	230.189	4.0305	12	3	1	0	0	0	1	0.117647	17	1	0	57.903	25	3	0	0	0	0	3	2	1
Fluminorex	ZINC000002036974	Benzene and substituted derivatives	Trifluoromethylbenzenes	280	-4.79	-7.03959	-6.9	4.79	7.03959	6.9	1.03537	0.398158	0.474	0.118	0.158	0.121	0.2185	9	1	1	1	1	0	0	0	2	230.189	4.0305	12	3	1	0	0	0	1	0.117647	17	1	0	57.903	25	3	0	0	0	0	3	2	1
Nafomine	ZINC000000001767	Naphthalenes	?	281	-3.89	-6.25686	-6.1	3.89	6.25686	6.1	3.90335	2.40652	0.891	0.46	0.538	0.999	0.85675	10	2	0	1	0	1	0	0	2	187.242	5.4169	15	2	1	0	0	0	0	0.133333	15	0	0	71.2248	27	0	0	0	0	0	0	1	1
Nafomine	ZINC000000001767	Naphthalenes	?	282	-3.77	-5.99946	-5.8	3.77	5.99946	5.8	1.96641	1.15792	0.919	0.609	0.715	0.547	0.682	10	2	0	1	0	1	0	0	2	187.242	5.4169	15	2	1	0	0	0	0	0.133333	15	0	0	71.2248	27	0	0	0	0	0	0	1	1
Nafomine	ZINC000000001767	Naphthalenes	?	283	-3.91	-5.89349	-5.8	3.91	5.89349	5.8	2.29754	0.807335	0.885	0.675	0.715	0.692	0.746	10	2	0	1	0	1	0	0	2	187.242	5.4169	15	2	1	0	0	0	0	0.133333	15	0	0	71.2248	27	0	0	0	0	0	0	1	1
Phenprocoumon	ZINC000100030679	Coumarins and derivatives	Hydroxycoumarins	284	-4.41	-6.96528	-6.9	4.41	6.96528	6.9	1.67726	1.15059	0.682	0.142	0.158	0.417	0.4185	15	3	0	0	1	2	0	0	3	280.323	5.7245	18	3	1	1	0	0	0	0.130435	23	1	0	100.824	37	0	0	0	0	0	0	0	3
Phenprocoumon	ZINC000100030679	Coumarins and derivatives	Hydroxycoumarins	285	-4.76	-6.95064	-6.9	4.76	6.95064	6.9	1.45697	0.966413	0.49	0.145	0.158	0.32	0.322	15	3	0	0	1	2	0	0	3	280.323	5.7245	18	3	1	1	0	0	0	0.130435	23	1	0	100.824	37	0	0	0	0	0	0	0	3
Trimethyldiphenylpropylamine	ZINC000002015732	Benzene and substituted derivatives	Diphenylmethanes	286	-4.19	-6.27293	-6.3	4.19	6.27293	6.3	1.90378	0.586422	0.784	0.451	0.421	0.523	0.56275	12	6	0	1	0	0	0	0	2	253.389	8.4811	23	0	1	1	0	0	1	0.25	20	0	0	108.395	42	0	0	0	0	0	0	1	0
Trimethyldiphenylpropylamine	ZINC000002015732	Benzene and substituted derivatives	Diphenylmethanes	287	-4.26	-6.27901	-6.3	4.26	6.27901	6.3	1.56076	1.03767	0.756	0.448	0.421	0.366	0.47725	12	6	0	1	0	0	0	0	2	253.389	8.4811	23	0	1	1	0	0	1	0.25	20	0	0	108.395	42	0	0	0	0	0	0	1	0
Trimethyldiphenylpropylamine	ZINC000002015732	Benzene and substituted derivatives	Diphenylmethanes	288	-3.65	-6.15924	-6.3	3.65	6.15924	6.3	1.86314	0.559103	0.944	0.519	0.421	0.498	0.59025	12	6	0	1	0	0	0	0	2	253.389	8.4811	23	0	1	1	0	0	1	0.25	20	0	0	108.395	42	0	0	0	0	0	0	1	0
Cycrimine	ZINC000000000199	Organonitrogen compounds	Amines	289	-3.94	-6.49381	-5.8	3.94	6.49381	5.8	2.68232	1.11627	0.877	0.33	0.715	0.832	0.814	16	3	1	0	0	1	0	0	3	287.447	9.0899	30	1	2	2	0	1	1	0.217391	23	1	0	118.539	50	0	0	0	0	0	0	1	1
Cycrimine	ZINC000000000199	Organonitrogen compounds	Amines	290	-4.21	-6.04021	-5.9	4.21	6.04021	5.9	2.73859	1.91279	0.777	0.587	0.662	0.852	0.78575	16	3	1	0	0	1	0	0	3	287.447	9.0899	30	1	2	2	0	1	1	0.217391	23	1	0	118.539	50	0	0	0	0	0	0	1	1
Cycrimine	ZINC000000000199	Organonitrogen compounds	Amines	291	-4.06	-6.18013	-6	4.06	6.18013	6	2.59165	1.36037	0.836	0.506	0.6	0.801	0.7595	16	3	1	0	0	1	0	0	3	287.447	9.0899	30	1	2	2	0	1	1	0.217391	23	1	0	118.539	50	0	0	0	0	0	0	1	1
Bakeprofen	ZINC000006020170	Benzene and substituted derivatives	Benzophenones	292	-4.92	-7.00498	-7.1	4.92	7.00498	7.1	1.01009	0.288731	0.403	0.128	0.101	0.111	0.1815	12	4	0	0	0	4	0	0	2	269.276	5.1571	16	4	0	1	1	0	0	0.238095	21	0	0	85.993	33	0	0	0	0	0	0	0	4
Bakeprofen	ZINC000006020170	Benzene and substituted derivatives	Benzophenones	293	-5.15	-7.29056	-7.4	5.15	7.29056	7.4	0.953216	0.602617	0.281	0.067	0.045	0.092	0.1275	12	4	0	0	0	4	0	0	2	269.276	5.1571	16	4	0	1	1	0	0	0.238095	21	0	0	85.993	33	0	0	0	0	0	0	0	4
Bakeprofen	ZINC000006020170	Benzene and substituted derivatives	Benzophenones	294	-5.06	-7.07175	-7.1	5.06	7.07175	7.1	1.3512	0.251195	0.326	0.111	0.101	0.27	0.24175	12	4	0	0	0	4	0	0	2	269.276	5.1571	16	4	0	1	1	0	0	0.238095	21	0	0	85.993	33	0	0	0	0	0	0	0	4
Cyclandelate	ZINC000008551998	Benzene and substituted derivatives	?	295	-4.5	-6.49891	-6.3	4.5	6.49891	6.3	1.45884	0.913027	0.634	0.326	0.421	0.322	0.42475	12	5	0	0	0	3	0	0	2	276.376	7.1937	27	3	1	1	0	1	0	0.190476	21	0	0	105.257	44	0	0	0	0	0	0	0	3
Cyclandelate	ZINC000008551998	Benzene and substituted derivatives	?	296	-4.6	-6.65546	-6.5	4.6	6.65546	6.5	1.50806	0.83629	0.575	0.257	0.313	0.344	0.394	12	5	0	0	0	3	0	0	2	276.376	7.1937	27	3	1	1	0	1	0	0.190476	21	0	0	105.257	44	0	0	0	0	0	0	0	3
Cyclandelate	ZINC000008551998	Benzene and substituted derivatives	?	297	-5.21	-6.49414	-6.3	5.21	6.49414	6.3	2.00504	1.32759	0.249	0.329	0.421	0.565	0.45	12	5	0	0	0	3	0	0	2	276.376	7.1937	27	3	1	1	0	1	0	0.190476	21	0	0	105.257	44	0	0	0	0	0	0	0	3
Mephobarbital	ZINC000095671365	Diazines	Pyrimidines and pyrimidine derivatives	298	-4.05	-5.03756	-5.2	4.05	5.03756	5.2	1.99605	0.635121	0.839	0.961	0.933	0.561	0.7235	10	3	2	0	0	3	0	0	2	246.266	3.6822	19	5	1	1	0	0	0	0.105263	19	1	0	74.9698	32	0	0	0	0	0	0	2	3
Mephobarbital	ZINC000095671365	Diazines	Pyrimidines and pyrimidine derivatives	299	-3.65	-5.03526	-5.2	3.65	5.03526	5.2	1.62854	1.15033	0.944	0.962	0.933	0.394	0.66625	10	3	2	0	0	3	0	0	2	246.266	3.6822	19	5	1	1	0	0	0	0.105263	19	1	0	74.9698	32	0	0	0	0	0	0	2	3
Trihexyphenidyl	ZINC000000968274	Organonitrogen compounds	Amines	300	-4.53	-5.95574	-5.8	4.53	5.95574	5.8	2.94698	1.36082	0.62	0.634	0.715	0.916	0.79175	20	0	1	0	0	1	0	0	4	301.474	9.7967	32	1	2	2	0	1	1	0.208333	24	1	0	125.46	53	0	0	0	0	0	0	1	1
Trihexyphenidyl	ZINC000000968274	Organonitrogen compounds	Amines	301	-4.7	-5.97829	-5.8	4.7	5.97829	5.8	2.53935	1.64158	0.522	0.621	0.715	0.78	0.69925	17	3	1	0	0	1	0	0	3	301.474	9.7967	32	1	2	2	0	1	1	0.208333	24	1	0	125.46	53	0	0	0	0	0	0	1	1
Trihexyphenidyl	ZINC000000968274	Organonitrogen compounds	Amines	302	-4.47	-6.83505	-6.6	4.47	6.83505	6.6	2.62742	1.7703	0.648	0.184	0.268	0.815	0.6365	18	2	1	0	0	1	0	0	4	301.474	9.7967	32	1	2	2	0	1	1	0.208333	24	1	0	125.46	53	0	0	0	0	0	0	1	1
Debrisoquin	ZINC000003594299	Tetrahydroisoquinolines	?	303	-4.32	-5.76091	-5.6	4.32	5.76091	5.6	2.33447	1.57367	0.729	0.743	0.81	0.705	0.73725	9	1	1	2	0	0	0	0	2	175.235	4.4998	16	3	2	1	0	0	2	0.0714286	14	1	0	64.3064	26	0	0	0	0	0	0	3	0
Debrisoquin	ZINC000003594299	Tetrahydroisoquinolines	?	304	-4.34	-6.30795	-6.1	4.34	6.30795	6.1	2.31075	1.61662	0.719	0.431	0.538	0.697	0.66275	9	1	1	2	0	0	0	0	2	175.235	4.4998	16	3	2	1	0	0	2	0.0714286	14	1	0	64.3064	26	0	0	0	0	0	0	3	0
Debrisoquin	ZINC000003594299	Tetrahydroisoquinolines	?	305	-4.34	-5.77151	-5.6	4.34	5.77151	5.6	2.05856	1.31346	0.719	0.738	0.81	0.593	0.67875	9	1	1	2	0	0	0	0	2	175.235	4.4998	16	3	2	1	0	0	2	0.0714286	14	1	0	64.3064	26	0	0	0	0	0	0	3	0
Fludorex	ZINC000002018873	Benzene and substituted derivatives	Trifluoromethylbenzenes	306	-4.22	-5.94135	-5.9	4.22	5.94135	5.9	2.28401	1.57589	0.772	0.643	0.662	0.689	0.703	6	5	0	1	0	1	0	0	1	233.233	6.1668	15	1	1	0	0	0	1	0.3125	16	0	0	70.6791	30	3	0	0	0	0	3	1	1
Fludorex	ZINC000002018873	Benzene and substituted derivatives	Trifluoromethylbenzenes	307	-3.76	-5.94479	-5.9	3.76	5.94479	5.9	2.35646	1.6377	0.922	0.641	0.662	0.715	0.7535	6	5	0	1	0	1	0	0	1	233.233	6.1668	15	1	1	0	0	0	1	0.3125	16	0	0	70.6791	30	3	0	0	0	0	3	1	1
Fludorex	ZINC000002018873	Benzene and substituted derivatives	Trifluoromethylbenzenes	308	-3.51	-5.9394	-5.9	3.51	5.9394	5.9	2.38962	1.64075	0.965	0.644	0.662	0.728	0.77075	6	5	0	1	0	1	0	0	1	233.233	6.1668	15	1	1	0	0	0	1	0.3125	16	0	0	70.6791	30	3	0	0	0	0	3	1	1
Piperphenidol	ZINC000000000632	Benzene and substituted derivatives	Phenylbutylamines	309	-4.46	-6.62841	-6.5	4.46	6.62841	6.5	1.84504	1.17299	0.652	0.267	0.313	0.491	0.48675	11	7	1	0	0	1	0	0	2	275.436	9.1866	30	1	2	2	0	1	1	0.285714	21	1	0	115.963	49	0	0	0	0	0	0	1	1
Piperphenidol	ZINC000000000632	Benzene and substituted derivatives	Phenylbutylamines	310	-4.87	-6.5521	-5.8	4.87	6.5521	5.8	2.16986	1.27136	0.429	0.299	0.715	0.646	0.609	11	7	1	0	0	1	0	0	2	275.436	9.1866	30	1	2	2	0	1	1	0.285714	21	1	0	115.963	49	0	0	0	0	0	0	1	1
Piperphenidol	ZINC000000000632	Benzene and substituted derivatives	Phenylbutylamines	311	-4.45	-6.55154	-6.4	4.45	6.55154	6.4	1.92005	0.588594	0.658	0.3	0.362	0.529	0.5195	11	7	1	0	0	1	0	0	2	275.436	9.1866	30	1	2	2	0	1	1	0.285714	21	1	0	115.963	49	0	0	0	0	0	0	1	1
Felipyrine	ZINC000000000287	Pyrrolidines	Phenylpyrrolidines	312	-4.37	-6.7704	-6.8	4.37	6.7704	6.8	0.727759	0.496353	0.702	0.211	0.194	0.039	0.2435	15	0	2	0	0	1	0	0	3	244.338	6.6983	22	2	1	1	0	0	1	0.1	20	2	0	89.8491	38	0	0	0	0	0	0	2	1
Felipyrine	ZINC000000000287	Pyrrolidines	Phenylpyrrolidines	313	-4.35	-6.78031	-6.8	4.35	6.78031	6.8	1.27413	0.21914	0.713	0.208	0.194	0.234	0.34375	15	0	2	0	0	1	0	0	3	244.338	6.6983	22	2	1	1	0	0	1	0.1	20	2	0	89.8491	38	0	0	0	0	0	0	2	1
Felipyrine	ZINC000000000287	Pyrrolidines	Phenylpyrrolidines	314	-5.48	-6.38319	-6.3	5.48	6.38319	6.3	0.626025	0.375274	0.152	0.388	0.421	0.024	0.15525	15	0	2	0	0	1	0	0	3	244.338	6.6983	22	2	1	1	0	0	1	0.1	20	2	0	89.8491	38	0	0	0	0	0	0	2	1
Flufenamic-acid	ZINC000000086535	Benzene and substituted derivatives	Benzoic acids and derivatives	315	-4.81	-7.00705	-7	4.81	7.00705	7	0.914658	0.186225	0.461	0.127	0.129	0.082	0.1885	12	2	0	1	0	2	0	0	2	280.225	5.7164	11	2	1	2	1	0	0	0.190476	21	0	0	75.4234	29	3	0	0	0	0	3	1	2
Flufenamic-acid	ZINC000000086535	Benzene and substituted derivatives	Benzoic acids and derivatives	316	-5.11	-6.54448	-6.5	5.11	6.54448	6.5	2.15089	1.4416	0.3	0.303	0.313	0.636	0.47125	12	2	0	1	0	2	0	0	2	280.225	5.7164	11	2	1	2	1	0	0	0.190476	21	0	0	75.4234	29	3	0	0	0	0	3	1	2
Flufenamic-acid	ZINC000000086535	Benzene and substituted derivatives	Benzoic acids and derivatives	317	-4.57	-7.03129	-7	4.57	7.03129	7	1.68151	1.13583	0.595	0.12	0.129	0.419	0.3905	12	2	0	1	0	2	0	0	2	280.225	5.7164	11	2	1	2	1	0	0	0.190476	21	0	0	75.4234	29	3	0	0	0	0	3	1	2
Bifluranol	ZINC000004212152	Stilbenes	?	318	-5.69	-7.45844	-7.1	5.69	7.45844	7.1	2.31596	0.603114	0.094	0.039	0.101	0.699	0.39825	12	5	0	0	0	2	0	0	2	292.325	6.2486	20	2	2	2	0	0	0	0.181818	22	0	0	98.787	39	2	0	0	0	0	2	0	2
Bifluranol	ZINC000004212152	Stilbenes	?	319	-4.18	-7.55781	-7.2	4.18	7.55781	7.2	1.91277	1.12498	0.789	0.029	0.08	0.527	0.48075	12	5	0	0	0	2	0	0	2	292.325	6.2486	20	2	2	2	0	0	0	0.181818	22	0	0	98.787	39	2	0	0	0	0	2	0	2
Bifluranol	ZINC000004212152	Stilbenes	?	320	-5.52	-7.47743	-7.1	5.52	7.47743	7.1	2.92647	1.05384	0.138	0.037	0.101	0.913	0.51625	12	5	0	0	0	2	0	0	2	292.325	6.2486	20	2	2	2	0	0	0	0.181818	22	0	0	98.787	39	2	0	0	0	0	2	0	2
Butibufen	ZINC000000015537	Prenol lipids	Monoterpenoids	321	-3.64	-6.02062	-6	3.64	6.02062	6	1.44591	0.395669	0.947	0.6	0.6	0.316	0.54475	6	8	0	0	0	2	0	0	1	219.304	6.9578	20	2	0	1	1	0	0	0.3125	16	0	0	85.1285	35	0	0	0	0	0	0	0	2
Butibufen	ZINC000000015537	Prenol lipids	Monoterpenoids	322	-3.41	-6.02575	-6.1	3.41	6.02575	6.1	1.49303	0.360372	0.976	0.596	0.538	0.337	0.547	6	8	0	0	0	2	0	0	1	219.304	6.9578	20	2	0	1	1	0	0	0.3125	16	0	0	85.1285	35	0	0	0	0	0	0	0	2
Butibufen	ZINC000000015537	Prenol lipids	Monoterpenoids	323	-2.99	-5.65151	-5.6	2.99	5.65151	5.6	2.52137	1.25266	0.998	0.795	0.81	0.774	0.839	6	8	0	0	0	2	0	0	1	219.304	6.9578	20	2	0	1	1	0	0	0.3125	16	0	0	85.1285	35	0	0	0	0	0	0	0	2
Tolperisone	ZINC000000057519	Organooxygen compounds	Carbonyl compounds	324	-5.17	-6.83006	-6.8	5.17	6.83006	6.8	1.4646	1.01949	0.269	0.185	0.194	0.325	0.27825	11	5	1	0	0	1	0	0	2	245.366	7.9494	24	1	1	1	0	0	1	0.210526	19	1	0	99.0874	41	0	0	0	0	0	0	1	1
Tolperisone	ZINC000000057519	Organooxygen compounds	Carbonyl compounds	325	-5.28	-6.82917	-6.8	5.28	6.82917	6.8	1.69954	1.18701	0.217	0.186	0.194	0.427	0.31625	11	5	1	0	0	1	0	0	2	245.366	7.9494	24	1	1	1	0	0	1	0.210526	19	1	0	99.0874	41	0	0	0	0	0	0	1	1
Tolperisone	ZINC000000057519	Organooxygen compounds	Carbonyl compounds	326	-4.81	-6.23421	-6.2	4.81	6.23421	6.2	1.33749	0.236718	0.461	0.47	0.474	0.263	0.36525	11	5	1	0	0	1	0	0	2	245.366	7.9494	24	1	1	1	0	0	1	0.210526	19	1	0	99.0874	41	0	0	0	0	0	0	1	1
Bendazol	ZINC000000113392	Benzimidazoles	?	327	-5.25	-7.42193	-7.4	5.25	7.42193	7.4	1.25582	0.813399	0.228	0.044	0.045	0.226	0.18125	13	1	2	0	0	0	0	0	3	208.264	4.9873	13	1	1	1	0	0	0	0.111111	18	1	0	78.1364	28	0	0	0	0	0	0	2	0
Bendazol	ZINC000000113392	Benzimidazoles	?	328	-5.26	-7.40554	-7.4	5.26	7.40554	7.4	0.475171	0.326128	0.225	0.048	0.045	0.01	0.0725	13	1	2	0	0	0	0	0	3	208.264	4.9873	13	1	1	1	0	0	0	0.111111	18	1	0	78.1364	28	0	0	0	0	0	0	2	0
Bendazol	ZINC000000113392	Benzimidazoles	?	329	-5.27	-7.41908	-7.4	5.27	7.41908	7.4	1.09299	0.749521	0.221	0.045	0.045	0.149	0.141	13	1	2	0	0	0	0	0	3	208.264	4.9873	13	1	1	1	0	0	0	0.111111	18	1	0	78.1364	28	0	0	0	0	0	0	2	0
Fenfluramine	ZINC000000001612	Benzene and substituted derivatives	Phenethylamines	330	-4.07	-5.80729	-5.6	4.07	5.80729	5.6	2.96548	1.45793	0.832	0.722	0.81	0.922	0.8715	6	6	0	1	0	0	0	0	1	231.261	6.942	16	0	1	0	0	0	1	0.3125	16	0	0	76.5151	32	3	0	0	0	0	3	1	0
Fenfluramine	ZINC000000001612	Benzene and substituted derivatives	Phenethylamines	331	-3.9	-6.22351	-6.2	3.9	6.22351	6.2	2.66518	1.22443	0.887	0.478	0.474	0.828	0.75425	6	6	0	1	0	0	0	0	1	231.261	6.942	16	0	1	0	0	0	1	0.3125	16	0	0	76.5151	32	3	0	0	0	0	3	1	0
Fenfluramine	ZINC000000001612	Benzene and substituted derivatives	Phenethylamines	332	-3.92	-6.06917	-6.1	3.92	6.06917	6.1	2.81723	1.82845	0.883	0.57	0.538	0.882	0.79625	6	6	0	1	0	0	0	0	1	231.261	6.942	16	0	1	0	0	0	1	0.3125	16	0	0	76.5151	32	3	0	0	0	0	3	1	0
Dexibuprofen	ZINC000000113398	Phenylpropanoic acids	?	333	-3.46	-6.23636	-6.2	3.46	6.23636	6.2	1.16412	0.469295	0.972	0.468	0.474	0.18	0.4515	6	7	0	0	0	2	0	0	1	205.277	6.251	18	2	0	1	1	0	0	0.266667	15	0	0	78.2075	32	0	0	0	0	0	0	0	2
Dexibuprofen	ZINC000000113398	Phenylpropanoic acids	?	334	-3.7	-5.83	-6	3.7	5.83	6	0.825919	0.566423	0.934	0.71	0.6	0.059	0.413	6	7	0	0	0	2	0	0	1	205.277	6.251	18	2	0	1	1	0	0	0.266667	15	0	0	78.2075	32	0	0	0	0	0	0	0	2
Dexibuprofen	ZINC000000113398	Phenylpropanoic acids	?	335	-3.58	-5.85316	-5.8	3.58	5.85316	5.8	1.02009	0.1753	0.956	0.698	0.715	0.116	0.47575	6	7	0	0	0	2	0	0	1	205.277	6.251	18	2	0	1	1	0	0	0.266667	15	0	0	78.2075	32	0	0	0	0	0	0	0	2
Nicoclonate	ZINC000000000538	Benzene and substituted derivatives	Benzyloxycarbonyls	336	-3.87	-5.9835	-6	3.87	5.9835	6	2.42269	1.69513	0.896	0.619	0.6	0.742	0.745	11	5	1	0	0	2	0	0	2	289.762	6.7088	19	3	0	0	0	0	0	0.238095	21	1	0	96.3465	36	1	0	0	1	0	0	1	2
Nicoclonate	ZINC000000000538	Benzene and substituted derivatives	Benzyloxycarbonyls	337	-5.07	-6.02277	-6	5.07	6.02277	6	2.41522	1.66069	0.32	0.598	0.6	0.738	0.599	11	5	1	0	0	2	0	0	2	289.762	6.7088	19	3	0	0	0	0	0	0.238095	21	1	0	96.3465	36	1	0	0	1	0	0	1	2
Nicoclonate	ZINC000000000538	Benzene and substituted derivatives	Benzyloxycarbonyls	338	-4.96	-6.03154	-6	4.96	6.03154	6	2.55121	1.75554	0.378	0.592	0.6	0.784	0.6365	11	5	1	0	0	2	0	0	2	289.762	6.7088	19	3	0	0	0	0	0	0.238095	21	1	0	96.3465	36	1	0	0	1	0	0	1	2
Delucemine	ZINC000002009020	Benzene and substituted derivatives	Diphenylmethanes	339	-5.16	-6.53943	-6.2	5.16	6.53943	6.2	3.04186	2.05681	0.277	0.305	0.474	0.943	0.65925	12	4	0	1	0	0	0	0	2	261.315	7.2821	17	0	1	0	0	0	1	0.25	20	0	0	92.1661	36	2	0	0	0	0	2	1	0
Delucemine	ZINC000002009020	Benzene and substituted derivatives	Diphenylmethanes	340	-4.77	-6.73505	-7	4.77	6.73505	7	2.74843	1.93519	0.483	0.225	0.129	0.858	0.582	12	4	0	1	0	0	0	0	2	261.315	7.2821	17	0	1	0	0	0	1	0.25	20	0	0	92.1661	36	2	0	0	0	0	2	1	0
Delucemine	ZINC000002009020	Benzene and substituted derivatives	Diphenylmethanes	341	-4.53	-6.42276	-6.5	4.53	6.42276	6.5	2.03757	1.39118	0.62	0.368	0.313	0.582	0.52425	12	4	0	1	0	0	0	0	2	261.315	7.2821	17	0	1	0	0	0	1	0.25	20	0	0	92.1661	36	2	0	0	0	0	2	1	0
Dioxadrol	ZINC000003080605	Benzene and substituted derivatives	Diphenylmethanes	342	-4.94	-7.40763	-7.4	4.94	7.40763	7.4	3.01387	2.11877	0.39	0.047	0.045	0.936	0.57675	20	0	1	0	2	0	0	0	4	309.409	8.5827	25	2	1	0	0	0	1	0.115385	26	2	0	113.13	46	0	0	0	0	0	0	1	2
Clobenzorex	ZINC000019890803	Benzene and substituted derivatives	Phenethylamines	343	-5.13	-7.02457	-7	5.13	7.02457	7	0.936043	0.276838	0.29	0.122	0.129	0.087	0.14825	12	4	0	1	0	0	0	0	2	259.78	7.7803	18	0	1	0	0	0	1	0.263158	19	0	0	98.3171	36	1	0	0	1	0	0	1	0
Clobenzorex	ZINC000019890803	Benzene and substituted derivatives	Phenethylamines	344	-4.7	-7.01083	-7	4.7	7.01083	7	0.81698	0.524912	0.522	0.126	0.129	0.056	0.19075	12	4	0	1	0	0	0	0	2	259.78	7.7803	18	0	1	0	0	0	1	0.263158	19	0	0	98.3171	36	1	0	0	1	0	0	1	0
Clobenzorex	ZINC000019890803	Benzene and substituted derivatives	Phenethylamines	345	-4.6	-6.54018	-6.5	4.6	6.54018	6.5	1.31338	0.891718	0.575	0.304	0.313	0.252	0.348	12	4	0	1	0	0	0	0	2	259.78	7.7803	18	0	1	0	0	0	1	0.263158	19	0	0	98.3171	36	1	0	0	1	0	0	1	0
Piperidolate	ZINC000000057474	Benzene and substituted derivatives	Diphenylmethanes	346	-4.12	-6.45044	-6.4	4.12	6.45044	6.4	2.41553	1.6789	0.816	0.352	0.362	0.738	0.6635	17	4	1	0	0	2	0	0	3	323.436	8.8413	27	2	1	1	0	0	1	0.230769	26	1	0	121.586	49	0	0	0	0	0	0	1	2
Piperidolate	ZINC000000057474	Benzene and substituted derivatives	Diphenylmethanes	347	-4.17	-6.72284	-6.8	4.17	6.72284	6.8	2.24052	1.57095	0.794	0.229	0.194	0.673	0.5835	17	4	1	0	0	2	0	0	3	323.436	8.8413	27	2	1	1	0	0	1	0.230769	26	1	0	121.586	49	0	0	0	0	0	0	1	2
Piperidolate	ZINC000000057474	Benzene and substituted derivatives	Diphenylmethanes	348	-3.98	-6.75126	-6.8	3.98	6.75126	6.8	2.38163	0.729282	0.865	0.218	0.194	0.725	0.62725	17	4	1	0	0	2	0	0	3	323.436	8.8413	27	2	1	1	0	0	1	0.230769	26	1	0	121.586	49	0	0	0	0	0	0	1	2
Esflurbiprofen	ZINC000000008667	Benzene and substituted derivatives	Biphenyls and derivatives	349	-3.79	-7.00101	-7	3.79	7.00101	7	1.47428	0.267133	0.915	0.13	0.129	0.331	0.4265	12	3	0	0	0	2	0	0	2	243.257	5.621	13	2	0	1	1	0	0	0.157895	19	0	0	78.9295	30	1	0	0	0	0	1	0	2
Esflurbiprofen	ZINC000000008667	Benzene and substituted derivatives	Biphenyls and derivatives	350	-3.5	-5.71574	-7.2	3.5	5.71574	7.2	1.3702	0.363521	0.967	0.766	0.08	0.28	0.40175	12	3	0	0	0	2	0	0	2	243.257	5.621	13	2	0	1	1	0	0	0.157895	19	0	0	78.9295	30	1	0	0	0	0	1	0	2
Esflurbiprofen	ZINC000000008667	Benzene and substituted derivatives	Biphenyls and derivatives	351	-3.69	-7.22318	-7.1	3.69	7.22318	7.1	1.11178	0.169437	0.936	0.08	0.101	0.156	0.33725	12	3	0	0	0	2	0	0	2	243.257	5.621	13	2	0	1	1	0	0	0.157895	19	0	0	78.9295	30	1	0	0	0	0	1	0	2
Imafen	ZINC000004213542	Benzene and substituted derivatives	?	352	-4.6	-6.4016	-6.4	4.6	6.4016	6.4	1.50248	1.05198	0.575	0.38	0.362	0.341	0.40475	11	0	3	0	0	0	0	0	3	187.246	3.7454	16	3	1	1	0	0	2	0.0625	16	2	0	62.189	27	0	0	0	0	0	0	3	0
Imafen	ZINC000004213542	Benzene and substituted derivatives	?	353	-4.63	-6.40971	-6.3	4.63	6.40971	6.3	1.58305	0.907402	0.556	0.374	0.421	0.376	0.43225	11	0	3	0	0	0	0	0	3	187.246	3.7454	16	3	1	1	0	0	2	0.0625	16	2	0	62.189	27	0	0	0	0	0	0	3	0
Imafen	ZINC000004213542	Benzene and substituted derivatives	?	354	-4.36	-6.4037	-6.3	4.36	6.4037	6.3	1.38321	0.772052	0.707	0.378	0.421	0.288	0.426	11	0	3	0	0	0	0	0	3	187.246	3.7454	16	3	1	1	0	0	2	0.0625	16	2	0	62.189	27	0	0	0	0	0	0	3	0
Flunixin	ZINC000000001467	Benzene and substituted derivatives	Trifluoromethylbenzenes	355	-4.77	-6.5171	-6.5	4.77	6.5171	6.5	3.05772	1.70821	0.483	0.318	0.313	0.947	0.6725	11	3	1	1	0	2	0	0	2	295.24	5.6731	13	3	1	2	1	0	0	0.181818	22	1	0	79.2414	31	3	0	0	0	0	3	2	2
Flunixin	ZINC000000001467	Benzene and substituted derivatives	Trifluoromethylbenzenes	356	-4.84	-6.61501	-6.6	4.84	6.61501	6.6	2.96469	1.34676	0.446	0.27	0.268	0.922	0.6395	11	3	1	1	0	2	0	0	2	295.24	5.6731	13	3	1	2	1	0	0	0.181818	22	1	0	79.2414	31	3	0	0	0	0	3	2	2
Flunixin	ZINC000000001467	Benzene and substituted derivatives	Trifluoromethylbenzenes	357	-4.38	-5.90696	-6.1	4.38	5.90696	6.1	2.85402	1.99586	0.698	0.667	0.538	0.894	0.756	11	3	1	1	0	2	0	0	2	295.24	5.6731	13	3	1	2	1	0	0	0.181818	22	1	0	79.2414	31	3	0	0	0	0	3	2	2
Ciclopirox	ZINC000000001145	Pyridines and derivatives	Hydropyridines	358	-3.87	-6.43433	-6.4	3.87	6.43433	6.4	1.11267	0.77439	0.896	0.363	0.362	0.157	0.393	11	1	1	0	0	2	0	0	2	207.273	5.073	19	3	1	1	0	0	0	0.0625	16	1	0	77.9724	32	0	0	0	0	0	0	1	2
Ciclopirox	ZINC000000001145	Pyridines and derivatives	Hydropyridines	359	-4.09	-6.43938	-6.4	4.09	6.43938	6.4	1.16982	0.80868	0.826	0.36	0.362	0.184	0.389	11	1	1	0	0	2	0	0	2	207.273	5.073	19	3	1	1	0	0	0	0.0625	16	1	0	77.9724	32	0	0	0	0	0	0	1	2
Ciclopirox	ZINC000000001145	Pyridines and derivatives	Hydropyridines	360	-3.87	-6.29315	-6.4	3.87	6.29315	6.4	1.13523	0.762721	0.896	0.44	0.362	0.168	0.3985	11	1	1	0	0	2	0	0	2	207.273	5.073	19	3	1	1	0	0	0	0.0625	16	1	0	77.9724	32	0	0	0	0	0	0	1	2
Pirandamine	ZINC000000000635	Indenes and isoindenes	?	361	-5.09	-6.84846	-6.8	5.09	6.84846	6.8	1.70738	1.19734	0.31	0.179	0.194	0.431	0.3415	12	5	0	1	1	0	0	0	3	257.377	8.1077	24	1	1	1	0	0	1	0.142857	21	1	0	105.315	42	0	0	0	0	0	0	1	1
Rofelodine	ZINC000031297912	Pyrrolidines	Phenylpyrrolidines	362	-4.91	-7.20071	-7.2	4.91	7.20071	7.2	0.893584	0.624775	0.409	0.086	0.08	0.075	0.15975	13	0	2	0	0	1	0	0	3	214.268	3.9737	17	3	0	0	0	0	1	0.0555556	18	2	0	72.5724	30	0	0	0	0	0	0	2	1
Rofelodine	ZINC000031297912	Pyrrolidines	Phenylpyrrolidines	363	-4.63	-7.19988	-7.2	4.63	7.19988	7.2	1.59614	1.11173	0.556	0.086	0.08	0.381	0.3495	13	0	2	0	0	1	0	0	3	214.268	3.9737	17	3	0	0	0	0	1	0.0555556	18	2	0	72.5724	30	0	0	0	0	0	0	2	1
Rofelodine	ZINC000031297912	Pyrrolidines	Phenylpyrrolidines	364	-4.65	-7.20442	-7.2	4.65	7.20442	7.2	1.60863	1.13338	0.547	0.085	0.08	0.386	0.34975	13	0	2	0	0	1	0	0	3	214.268	3.9737	17	3	0	0	0	0	1	0.0555556	18	2	0	72.5724	30	0	0	0	0	0	0	2	1
Cilutazoline	ZINC000000001151	Phenol ethers	?	365	-5.55	-5.86233	-5.9	5.55	5.86233	5.9	2.42972	1.61543	0.126	0.694	0.662	0.744	0.569	12	2	2	0	0	1	0	0	3	230.311	5.9446	21	3	1	1	0	0	1	0.210526	19	1	0	83.0628	35	0	0	0	0	0	0	2	1
Cilutazoline	ZINC000000001151	Phenol ethers	?	366	-5.26	-5.83057	-5.8	5.26	5.83057	5.8	2.76328	1.54618	0.225	0.71	0.715	0.864	0.667	12	2	2	0	0	1	0	0	3	230.311	5.9446	21	3	1	1	0	0	1	0.210526	19	1	0	83.0628	35	0	0	0	0	0	0	2	1
Cilutazoline	ZINC000000001151	Phenol ethers	?	367	-5.13	-5.88207	-5.9	5.13	5.88207	5.9	2.73614	1.7818	0.29	0.682	0.662	0.851	0.6635	12	2	2	0	0	1	0	0	3	230.311	5.9446	21	3	1	1	0	0	1	0.210526	19	1	0	83.0628	35	0	0	0	0	0	0	2	1
Odalprofen	ZINC000003777867	Benzene and substituted derivatives	Diphenylmethanes	368	-4.89	-6.94769	-6.8	4.89	6.94769	6.8	3.24686	1.42183	0.418	0.146	0.194	0.975	0.6405	15	5	2	0	0	2	0	0	3	320.392	6.9373	23	4	0	0	0	0	0	0.230769	26	1	0	114.275	44	0	0	0	0	0	0	2	2
Odalprofen	ZINC000003777867	Benzene and substituted derivatives	Diphenylmethanes	369	-5.47	-6.85496	-6.7	5.47	6.85496	6.7	2.74258	1.24586	0.153	0.177	0.229	0.854	0.5225	15	5	2	0	0	2	0	0	3	320.392	6.9373	23	4	0	0	0	0	0	0.230769	26	1	0	114.275	44	0	0	0	0	0	0	2	2
Odalprofen	ZINC000003777867	Benzene and substituted derivatives	Diphenylmethanes	370	-4.52	-6.85108	-6.8	4.52	6.85108	6.8	1.99436	1.36431	0.625	0.178	0.194	0.56	0.48475	15	5	2	0	0	2	0	0	3	320.392	6.9373	23	4	0	0	0	0	0	0.230769	26	1	0	114.275	44	0	0	0	0	0	0	2	2
Crilvastatin	ZINC000003775270	Carboxylic acids and derivatives	Amino acids, peptides, and analogues	371	-4.65	-5.87229	-5.8	4.65	5.87229	5.8	1.21214	0.500506	0.547	0.688	0.715	0.204	0.4175	10	4	1	0	0	3	0	0	2	253.342	6.8922	27	4	1	1	0	0	0	0.157895	19	1	0	91.2076	41	0	0	0	0	0	0	1	3
Crilvastatin	ZINC000003775270	Carboxylic acids and derivatives	Amino acids, peptides, and analogues	372	-4.31	-5.90969	-5.8	4.31	5.90969	5.8	1.20186	0.75056	0.734	0.666	0.715	0.199	0.46175	10	4	1	0	0	3	0	0	2	253.342	6.8922	27	4	1	1	0	0	0	0.157895	19	1	0	91.2076	41	0	0	0	0	0	0	1	3
Crilvastatin	ZINC000003775270	Carboxylic acids and derivatives	Amino acids, peptides, and analogues	373	-4.13	-6.00181	-6.1	4.13	6.00181	6.1	0.89053	0.609217	0.812	0.608	0.538	0.075	0.375	10	4	1	0	0	3	0	0	2	253.342	6.8922	27	4	1	1	0	0	0	0.157895	19	1	0	91.2076	41	0	0	0	0	0	0	1	3
Piperphenidol	ZINC000000000632	Benzene and substituted derivatives	Phenylbutylamines	374	-4.7	-6.51401	-6.6	4.7	6.51401	6.6	2.32406	1.23622	0.522	0.32	0.268	0.701	0.548	11	7	1	0	0	1	0	0	2	275.436	9.1866	30	1	2	2	0	1	1	0.285714	21	1	0	115.963	49	0	0	0	0	0	0	1	1
Piperphenidol	ZINC000000000632	Benzene and substituted derivatives	Phenylbutylamines	375	-5.52	-6.32844	-6.2	5.52	6.32844	6.2	2.71149	1.75559	0.138	0.42	0.474	0.84	0.573	11	7	1	0	0	1	0	0	2	275.436	9.1866	30	1	2	2	0	1	1	0.285714	21	1	0	115.963	49	0	0	0	0	0	0	1	1
Piperphenidol	ZINC000000000632	Benzene and substituted derivatives	Phenylbutylamines	376	-4.2	-5.68736	-6.1	4.2	5.68736	6.1	1.859	1.24112	0.781	0.776	0.538	0.497	0.57825	11	7	1	0	0	1	0	0	2	275.436	9.1866	30	1	2	2	0	1	1	0.285714	21	1	0	115.963	49	0	0	0	0	0	0	1	1
Furofenac	ZINC000005651200	Coumarans	?	377	-3.88	-6.05173	-6	3.88	6.05173	6	3.07048	1.62546	0.893	0.582	0.6	0.949	0.84775	8	4	0	0	1	2	0	0	2	205.233	5.0183	15	3	0	1	1	0	0	0.1875	16	1	0	68.7435	28	0	0	0	0	0	0	0	3
Furofenac	ZINC000005651200	Coumarans	?	378	-3.87	-5.59062	-5.5	3.87	5.59062	5.5	3.00431	1.25997	0.896	0.824	0.852	0.933	0.9035	8	4	0	0	1	2	0	0	2	205.233	5.0183	15	3	0	1	1	0	0	0.1875	16	1	0	68.7435	28	0	0	0	0	0	0	0	3
Furofenac	ZINC000005651200	Coumarans	?	379	-4.01	-5.39061	-5.3	4.01	5.39061	5.3	2.89846	1.50355	0.856	0.895	0.912	0.904	0.894	8	4	0	0	1	2	0	0	2	205.233	5.0183	15	3	0	1	1	0	0	0.1875	16	1	0	68.7435	28	0	0	0	0	0	0	0	3
Fadolmidine	ZINC000003822129	Indanes	?	380	-4.85	-6.78609	-6.6	4.85	6.78609	6.6	2.432	1.53303	0.44	0.205	0.268	0.745	0.5495	12	1	2	0	0	1	0	0	3	214.268	4.3791	16	2	2	2	0	0	0	0.111111	18	1	0	77.5714	30	0	0	0	0	0	0	2	1
Fadolmidine	ZINC000003822129	Indanes	?	381	-4.84	-6.79659	-6.6	4.84	6.79659	6.6	2.37311	1.50661	0.446	0.201	0.268	0.72	0.5385	12	1	2	0	0	1	0	0	3	214.268	4.3791	16	2	2	2	0	0	0	0.111111	18	1	0	77.5714	30	0	0	0	0	0	0	2	1
Fadolmidine	ZINC000003822129	Indanes	?	382	-4.81	-6.79469	-6.6	4.81	6.79469	6.6	2.115	1.22251	0.461	0.202	0.268	0.622	0.49325	12	1	2	0	0	1	0	0	3	214.268	4.3791	16	2	2	2	0	0	0	0.111111	18	1	0	77.5714	30	0	0	0	0	0	0	2	1
Emepronium	ZINC000001481836	Benzene and substituted derivatives	Diphenylmethanes	383	-4.73	-6.35687	-6.4	4.73	6.35687	6.4	2.13909	1.49592	0.505	0.405	0.362	0.632	0.53275	12	8	0	1	0	0	0	0	2	282.451	10.1198	28	0	0	0	0	0	1	0.272727	22	0	0	121.514	49	0	0	0	0	0	0	1	0
Emepronium	ZINC000001481836	Benzene and substituted derivatives	Diphenylmethanes	384	-4.44	-6.37412	-6.3	4.44	6.37412	6.3	2.15181	1.47547	0.664	0.393	0.421	0.636	0.58925	12	8	0	1	0	0	0	0	2	282.451	10.1198	28	0	0	0	0	0	1	0.272727	22	0	0	121.514	49	0	0	0	0	0	0	1	0
Emepronium	ZINC000001481836	Benzene and substituted derivatives	Diphenylmethanes	385	-3.53	-6.07464	-6.2	3.53	6.07464	6.2	2.8382	0.965819	0.963	0.567	0.474	0.89	0.80425	12	8	0	1	0	0	0	0	2	282.451	10.1198	28	0	0	0	0	0	1	0.272727	22	0	0	121.514	49	0	0	0	0	0	0	1	0
Lonaprofen	ZINC000001846409	Benzene and substituted derivatives	Phenoxyacetic acid derivatives	386	-5.03	-6.75145	-6.7	5.03	6.75145	6.7	0.501507	0.342243	0.342	0.217	0.229	0.012	0.14875	10	4	0	0	0	3	0	0	2	264.708	5.9414	16	3	0	0	0	0	0	0.210526	19	0	0	84.897	31	1	0	0	1	0	0	0	3
Lonaprofen	ZINC000001846409	Benzene and substituted derivatives	Phenoxyacetic acid derivatives	387	-4.93	-6.75222	-6.7	4.93	6.75222	6.7	0.277936	0.182561	0.395	0.216	0.229	0.001	0.1565	10	4	0	0	0	3	0	0	2	264.708	5.9414	16	3	0	0	0	0	0	0.210526	19	0	0	84.897	31	1	0	0	1	0	0	0	3
Lonaprofen	ZINC000001846409	Benzene and substituted derivatives	Phenoxyacetic acid derivatives	388	-4.71	-6.61875	-6.6	4.71	6.61875	6.6	0.824808	0.577265	0.516	0.269	0.268	0.058	0.225	10	4	0	0	0	3	0	0	2	264.708	5.9414	16	3	0	0	0	0	0	0.210526	19	0	0	84.897	31	1	0	0	1	0	0	0	3
Eperisone	ZINC000001846199	Organooxygen compounds	Carbonyl compounds	389	-4.57	-6.43648	-6.4	4.57	6.43648	6.4	1.07547	0.666431	0.595	0.362	0.362	0.14	0.30925	11	6	1	0	0	1	0	0	2	259.393	8.6562	26	1	1	1	0	0	1	0.25	20	1	0	106.008	44	0	0	0	0	0	0	1	1
Eperisone	ZINC000001846199	Organooxygen compounds	Carbonyl compounds	390	-4.86	-6.65534	-6.6	4.86	6.65534	6.6	0.4712	0.210631	0.435	0.257	0.268	0.009	0.18025	11	6	1	0	0	1	0	0	2	259.393	8.6562	26	1	1	1	0	0	1	0.25	20	1	0	106.008	44	0	0	0	0	0	0	1	1
Eperisone	ZINC000001846199	Organooxygen compounds	Carbonyl compounds	391	-5.15	-6.48203	-6.5	5.15	6.48203	6.5	1.30613	0.896339	0.281	0.338	0.313	0.248	0.2725	11	6	1	0	0	1	0	0	2	259.393	8.6562	26	1	1	1	0	0	1	0.25	20	1	0	106.008	44	0	0	0	0	0	0	1	1
Tenosal	ZINC000000012508	Phenol esters	?	392	-4.52	-5.66567	-5.6	4.52	5.66567	5.6	2.52705	1.74035	0.625	0.786	0.81	0.776	0.74675	10	2	0	0	0	4	0	1	2	247.251	3.8245	10	5	0	1	1	0	0	0.222222	18	1	0	68.1355	24	0	0	0	0	0	0	0	4
Tenosal	ZINC000000012508	Phenol esters	?	393	-4.3	-5.54534	-5.4	4.3	5.54534	5.4	2.48225	1.70663	0.738	0.841	0.888	0.761	0.787	10	2	0	0	0	4	0	1	2	247.251	3.8245	10	5	0	1	1	0	0	0.222222	18	1	0	68.1355	24	0	0	0	0	0	0	0	4
Tenosal	ZINC000000012508	Phenol esters	?	394	-4.5	-5.6465	-5.6	4.5	5.6465	5.6	2.60354	1.32701	0.634	0.799	0.81	0.806	0.764	10	2	0	0	0	4	0	1	2	247.251	3.8245	10	5	0	1	1	0	0	0.222222	18	1	0	68.1355	24	0	0	0	0	0	0	0	4
Alminoprofen	ZINC000001999253	Phenylpropanoic acids	?	395	-4.56	-5.72951	-5.7	4.56	5.72951	5.7	2.01934	1.35118	0.601	0.759	0.763	0.573	0.6275	6	7	0	1	0	2	0	0	1	218.276	5.9481	18	3	1	2	1	0	0	0.3125	16	0	0	80.9219	32	0	0	0	0	0	0	1	2
Alminoprofen	ZINC000001999253	Phenylpropanoic acids	?	396	-4.21	-5.59024	-5.6	4.21	5.59024	5.6	2.20063	0.855733	0.777	0.825	0.81	0.658	0.72575	6	7	0	1	0	2	0	0	1	218.276	5.9481	18	3	1	2	1	0	0	0.3125	16	0	0	80.9219	32	0	0	0	0	0	0	1	2
Alminoprofen	ZINC000001999253	Phenylpropanoic acids	?	397	-4.64	-6.12464	-6.1	4.64	6.12464	6.1	1.00518	0.198671	0.551	0.54	0.538	0.109	0.32675	6	7	0	1	0	2	0	0	1	218.276	5.9481	18	3	1	2	1	0	0	0.3125	16	0	0	80.9219	32	0	0	0	0	0	0	1	2
Isoprazone	ZINC000000001593	Pyrroles	Substituted pyrroles	398	-5.16	-7.06057	-6.9	5.16	7.06057	6.9	1.4097	0.256828	0.277	0.113	0.158	0.3	0.25875	10	5	1	1	0	1	0	0	2	242.322	6.9663	20	2	2	1	0	0	0	0.157895	19	1	0	94.1507	36	0	0	0	0	0	0	2	1
Bakeprofen	ZINC000006020170	Benzene and substituted derivatives	Benzophenones	399	-4.94	-7.22376	-7.2	4.94	7.22376	7.2	1.08253	0.693054	0.39	0.079	0.08	0.144	0.1895	12	4	0	0	0	4	0	0	2	269.276	5.1571	16	4	0	1	1	0	0	0.238095	21	0	0	85.993	33	0	0	0	0	0	0	0	4
Bakeprofen	ZINC000006020170	Benzene and substituted derivatives	Benzophenones	400	-4.88	-7.27002	-7.3	4.88	7.27002	7.3	1.398	0.977627	0.422	0.072	0.061	0.295	0.26825	12	4	0	0	0	4	0	0	2	269.276	5.1571	16	4	0	1	1	0	0	0.238095	21	0	0	85.993	33	0	0	0	0	0	0	0	4
Bakeprofen	ZINC000006020170	Benzene and substituted derivatives	Benzophenones	401	-4.3	-7.1489	-7.2	4.3	7.1489	7.2	1.67572	0.441665	0.738	0.094	0.08	0.416	0.4125	12	4	0	0	0	4	0	0	2	269.276	5.1571	16	4	0	1	1	0	0	0.238095	21	0	0	85.993	33	0	0	0	0	0	0	0	4
Stavudine	ZINC000000137884	Nucleoside and nucleotide analogues	?	402	-4.68	-6.12601	-6	4.68	6.12601	6	1.12505	0.519724	0.533	0.539	0.6	0.163	0.36475	8	2	2	0	1	3	0	0	2	224.216	1.5314	16	5	2	2	0	1	0	0.117647	17	2	0	69.3652	28	0	0	0	0	0	0	2	4
Stavudine	ZINC000000137884	Nucleoside and nucleotide analogues	?	403	-5.05	-6.10099	-6	5.05	6.10099	6	0.857898	0.566892	0.33	0.554	0.6	0.066	0.2655	8	2	2	0	1	3	0	0	2	224.216	1.5314	16	5	2	2	0	1	0	0.117647	17	2	0	69.3652	28	0	0	0	0	0	0	2	4
Stavudine	ZINC000000137884	Nucleoside and nucleotide analogues	?	404	-4.84	-6.11589	-6	4.84	6.11589	6	1.12775	0.649754	0.446	0.544	0.6	0.164	0.3435	8	2	2	0	1	3	0	0	2	224.216	1.5314	16	5	2	2	0	1	0	0.117647	17	2	0	69.3652	28	0	0	0	0	0	0	2	4
Methestrol	ZINC000001481875	Stilbenes	?	405	-4.76	-6.21977	-5.9	4.76	6.21977	5.9	2.5464	1.60506	0.49	0.481	0.662	0.782	0.679	12	8	0	0	0	2	0	0	2	298.426	8.2926	28	2	2	2	0	0	0	0.217391	23	0	0	122.066	48	0	0	0	0	0	0	0	2
Methestrol	ZINC000001481875	Stilbenes	?	406	-4.82	-6.2293	-5.9	4.82	6.2293	5.9	2.525	1.59327	0.456	0.475	0.662	0.775	0.667	12	8	0	0	0	2	0	0	2	298.426	8.2926	28	2	2	2	0	0	0	0.217391	23	0	0	122.066	48	0	0	0	0	0	0	0	2
Methestrol	ZINC000001481875	Stilbenes	?	407	-5.19	-6.22216	-5.9	5.19	6.22216	5.9	2.61598	1.49448	0.259	0.479	0.662	0.81	0.63525	12	8	0	0	0	2	0	0	2	298.426	8.2926	28	2	2	2	0	0	0	0.217391	23	0	0	122.066	48	0	0	0	0	0	0	0	2
Efetozole	ZINC000017022433	Azoles	Imidazoles	408	-3.88	-5.29246	-5.3	3.88	5.29246	5.3	0.712726	0.470898	0.893	0.918	0.912	0.038	0.47025	9	3	2	0	0	0	0	0	2	186.258	4.8193	15	2	0	0	0	0	0	0.133333	15	1	0	72.547	28	0	0	0	0	0	0	2	0
Efetozole	ZINC000017022433	Azoles	Imidazoles	409	-3.9	-5.74334	-5.7	3.9	5.74334	5.7	0.652867	0.36487	0.887	0.751	0.763	0.027	0.426	9	3	2	0	0	0	0	0	2	186.258	4.8193	15	2	0	0	0	0	0	0.133333	15	1	0	72.547	28	0	0	0	0	0	0	2	0
Efetozole	ZINC000017022433	Azoles	Imidazoles	410	-3.68	-6.13255	-6.2	3.68	6.13255	6.2	0.63198	0.310879	0.938	0.535	0.474	0.025	0.3655	9	3	2	0	0	0	0	0	2	186.258	4.8193	15	2	0	0	0	0	0	0.133333	15	1	0	72.547	28	0	0	0	0	0	0	2	0
Nerispirdine	ZINC000000005498	Indoles and derivatives	Indoles	411	-3.95	-6.15869	-6.2	3.95	6.15869	6.2	1.96108	1.27626	0.874	0.519	0.474	0.545	0.6095	13	4	2	1	0	0	0	0	3	283.35	7.0675	20	2	0	0	0	0	0	0.173913	23	2	0	103.48	39	1	0	0	0	0	1	3	0
Nerispirdine	ZINC000000005498	Indoles and derivatives	Indoles	412	-4.23	-6.2136	-6.2	4.23	6.2136	6.2	3.36651	2.31111	0.768	0.487	0.474	0.984	0.8025	13	4	2	1	0	0	0	0	3	283.35	7.0675	20	2	0	0	0	0	0	0.173913	23	2	0	103.48	39	1	0	0	0	0	1	3	0
Nerispirdine	ZINC000000005498	Indoles and derivatives	Indoles	413	-3.71	-5.51202	-5.5	3.71	5.51202	5.5	1.87257	1.29568	0.932	0.855	0.852	0.504	0.698	13	4	2	1	0	0	0	0	3	283.35	7.0675	20	2	0	0	0	0	0	0.173913	23	2	0	103.48	39	1	0	0	0	0	1	3	0
Meprylcaine	ZINC000002040457	Benzene and substituted derivatives	Benzoic acids and derivatives	414	-4.43	-5.87268	-5.8	4.43	5.87268	5.8	1.16222	0.660381	0.669	0.687	0.715	0.179	0.4355	6	8	0	1	0	2	0	0	1	235.327	6.8061	23	2	1	0	0	0	1	0.411765	17	0	0	92.7636	38	0	0	0	0	0	0	1	2
Meprylcaine	ZINC000002040457	Benzene and substituted derivatives	Benzoic acids and derivatives	415	-4.56	-5.88592	-5.9	4.56	5.88592	5.9	1.03192	0.571346	0.601	0.679	0.662	0.12	0.37575	6	8	0	1	0	2	0	0	1	235.327	6.8061	23	2	1	0	0	0	1	0.411765	17	0	0	92.7636	38	0	0	0	0	0	0	1	2
Meprylcaine	ZINC000002040457	Benzene and substituted derivatives	Benzoic acids and derivatives	416	-4.38	-5.89713	-5.9	4.38	5.89713	5.9	1.0418	0.636599	0.698	0.672	0.662	0.125	0.4025	6	8	0	1	0	2	0	0	1	235.327	6.8061	23	2	1	0	0	0	1	0.411765	17	0	0	92.7636	38	0	0	0	0	0	0	1	2
Pirdonium	ZINC000033852273	Benzene and substituted derivatives	Diphenylmethanes	417	-5.05	-6.4334	-6.5	5.05	6.4334	6.5	2.45947	1.72474	0.33	0.364	0.313	0.754	0.53775	17	5	1	0	0	1	0	0	3	324.488	10.9097	31	1	0	0	0	0	1	0.192308	26	1	0	131.731	54	0	0	0	0	0	0	1	1
Pirdonium	ZINC000033852273	Benzene and substituted derivatives	Diphenylmethanes	418	-4.94	-6.475	-6.5	4.94	6.475	6.5	2.63788	1.85224	0.39	0.341	0.313	0.82	0.58575	17	5	1	0	0	1	0	0	3	324.488	10.9097	31	1	0	0	0	0	1	0.192308	26	1	0	131.731	54	0	0	0	0	0	0	1	1
Eticyclidine	ZINC000001482061	Organonitrogen compounds	Amines	419	-3.32	-4.67987	-4.8	3.32	4.67987	4.8	1.88505	0.985548	0.984	0.986	0.979	0.512	0.74675	12	2	0	1	0	0	0	0	2	203.329	7.3631	21	0	1	0	0	0	1	0.1875	16	0	0	88.9881	36	0	0	0	0	0	0	1	0
Eticyclidine	ZINC000001482061	Organonitrogen compounds	Amines	420	-3.49	-5.05887	-5.1	3.49	5.05887	5.1	1.86236	0.501897	0.969	0.958	0.952	0.498	0.72925	12	2	0	1	0	0	0	0	2	203.329	7.3631	21	0	1	0	0	0	1	0.1875	16	0	0	88.9881	36	0	0	0	0	0	0	1	0
Eticyclidine	ZINC000001482061	Organonitrogen compounds	Amines	421	-3.44	-5.07307	-4.9	3.44	5.07307	4.9	2.53588	1.48698	0.973	0.957	0.97	0.779	0.87525	12	2	0	1	0	0	0	0	2	203.329	7.3631	21	0	1	0	0	0	1	0.1875	16	0	0	88.9881	36	0	0	0	0	0	0	1	0
Acetryptine	ZINC000000000870	Indoles and derivatives	Tryptamines and derivatives	422	-4.51	-5.88416	-5.9	4.51	5.88416	5.9	2.83526	1.67975	0.628	0.681	0.662	0.889	0.767	8	4	1	1	0	1	0	0	2	202.257	5.323	15	1	2	1	0	0	0	0.1875	16	1	0	76.7464	29	0	0	0	0	0	0	2	1
Acetryptine	ZINC000000000870	Indoles and derivatives	Tryptamines and derivatives	423	-5.33	-6.23782	-6	5.33	6.23782	6	2.8611	1.95514	0.2	0.468	0.6	0.896	0.648	8	4	1	1	0	1	0	0	2	202.257	5.323	15	1	2	1	0	0	0	0.1875	16	1	0	76.7464	29	0	0	0	0	0	0	2	1
Acetryptine	ZINC000000000870	Indoles and derivatives	Tryptamines and derivatives	424	-5.38	-6.17283	-6	5.38	6.17283	6	3.0571	1.63612	0.182	0.511	0.6	0.947	0.669	8	4	1	1	0	1	0	0	2	202.257	5.323	15	1	2	1	0	0	0	0.1875	16	1	0	76.7464	29	0	0	0	0	0	0	2	1
Ketorolac	ZINC000000011012	Organooxygen compounds	Carbonyl compounds	425	-3.84	-6.20131	-6.2	3.84	6.20131	6.2	3.11506	2.10313	0.905	0.493	0.474	0.957	0.82325	13	2	1	0	0	3	0	0	3	254.265	4.4976	14	4	0	1	1	0	0	0.142857	21	2	0	80.548	31	0	0	0	0	0	0	1	3
Ketorolac	ZINC000000011012	Organooxygen compounds	Carbonyl compounds	426	-4.47	-7.21419	-7.2	4.47	7.21419	7.2	2.90576	2.04151	0.648	0.082	0.08	0.907	0.6355	13	2	1	0	0	3	0	0	3	254.265	4.4976	14	4	0	1	1	0	0	0.142857	21	2	0	80.548	31	0	0	0	0	0	0	1	3
Ketorolac	ZINC000000011012	Organooxygen compounds	Carbonyl compounds	427	-4.41	-6.17883	-6.2	4.41	6.17883	6.2	3.03519	1.66432	0.682	0.508	0.474	0.941	0.7595	13	2	1	0	0	3	0	0	3	254.265	4.4976	14	4	0	1	1	0	0	0.142857	21	2	0	80.548	31	0	0	0	0	0	0	1	3
Isobucaine	ZINC000002019366	Benzene and substituted derivatives	Benzoic acids and derivatives	428	-4.25	-6.01218	-6.1	4.25	6.01218	6.1	1.49324	0.26765	0.761	0.603	0.538	0.338	0.49375	6	9	0	1	0	2	0	0	1	249.354	7.5129	25	2	1	0	0	0	1	0.388889	18	0	0	99.6846	41	0	0	0	0	0	0	1	2
Isobucaine	ZINC000002019366	Benzene and substituted derivatives	Benzoic acids and derivatives	429	-4.36	-6.19164	-6.3	4.36	6.19164	6.3	1.55708	0.158985	0.707	0.498	0.421	0.365	0.4645	6	9	0	1	0	2	0	0	1	249.354	7.5129	25	2	1	0	0	0	1	0.388889	18	0	0	99.6846	41	0	0	0	0	0	0	1	2
Isobucaine	ZINC000002019366	Benzene and substituted derivatives	Benzoic acids and derivatives	430	-4.69	-5.96731	-6	4.69	5.96731	6	1.34099	0.205546	0.528	0.628	0.6	0.265	0.4145	6	9	0	1	0	2	0	0	1	249.354	7.5129	25	2	1	0	0	0	1	0.388889	18	0	0	99.6846	41	0	0	0	0	0	0	1	2
Octisalate	ZINC000002041028	Benzene and substituted derivatives	Benzoic acids and derivatives	431	-4.18	-6.04319	-6.3	4.18	6.04319	6.3	2.37422	1.23827	0.789	0.586	0.421	0.72	0.6625	6	9	0	0	0	3	0	0	1	250.338	7.0078	25	3	1	1	0	0	0	0.444444	18	0	0	96.9855	40	0	0	0	0	0	0	0	3
Octisalate	ZINC000002041028	Benzene and substituted derivatives	Benzoic acids and derivatives	432	-4.04	-6.00641	-5.8	4.04	6.00641	5.8	1.99042	1.1641	0.844	0.605	0.715	0.558	0.66875	6	9	0	0	0	3	0	0	1	250.338	7.0078	25	3	1	1	0	0	0	0.444444	18	0	0	96.9855	40	0	0	0	0	0	0	0	3
Octisalate	ZINC000002041028	Benzene and substituted derivatives	Benzoic acids and derivatives	433	-4.63	-6.40368	-6.2	4.63	6.40368	6.2	1.86865	0.924432	0.556	0.378	0.474	0.501	0.508	6	9	0	0	0	3	0	0	1	250.338	7.0078	25	3	1	1	0	0	0	0.444444	18	0	0	96.9855	40	0	0	0	0	0	0	0	3
Fluminorex	ZINC000002036974	Benzene and substituted derivatives	Trifluoromethylbenzenes	434	-4.5	-7.0094	-6.8	4.5	7.0094	6.8	0.859899	0.253934	0.634	0.126	0.194	0.067	0.2405	9	1	1	1	1	0	0	0	2	230.189	4.0305	12	3	1	0	0	0	1	0.117647	17	1	0	57.903	25	3	0	0	0	0	3	2	1
Fluminorex	ZINC000002036974	Benzene and substituted derivatives	Trifluoromethylbenzenes	435	-4.44	-7.01275	-6.8	4.44	7.01275	6.8	0.658884	0.204675	0.664	0.125	0.194	0.028	0.2285	9	1	1	1	1	0	0	0	2	230.189	4.0305	12	3	1	0	0	0	1	0.117647	17	1	0	57.903	25	3	0	0	0	0	3	2	1
Fluminorex	ZINC000002036974	Benzene and substituted derivatives	Trifluoromethylbenzenes	436	-4.67	-7.0087	-6.8	4.67	7.0087	6.8	1.04849	0.149157	0.538	0.126	0.194	0.127	0.2465	9	1	1	1	1	0	0	0	2	230.189	4.0305	12	3	1	0	0	0	1	0.117647	17	1	0	57.903	25	3	0	0	0	0	3	2	1
Benhepazone	ZINC000000001002	Azoles	Imidazoles	437	-4.85	-6.99956	-7	4.85	6.99956	7	0.338289	0.0280402	0.44	0.131	0.129	0.002	0.14325	14	1	2	0	0	1	0	0	3	236.274	4.1388	14	3	0	0	0	0	0	0.1	20	1	0	83.552	30	0	0	0	0	0	0	2	1
Benhepazone	ZINC000000001002	Azoles	Imidazoles	438	-4.82	-6.99237	-7	4.82	6.99237	7	1.09315	0.609528	0.456	0.134	0.129	0.149	0.22075	14	1	2	0	0	1	0	0	3	236.274	4.1388	14	3	0	0	0	0	0	0.1	20	1	0	83.552	30	0	0	0	0	0	0	2	1
Benhepazone	ZINC000000001002	Azoles	Imidazoles	439	-4.83	-6.99411	-7	4.83	6.99411	7	0.274927	0.0236718	0.451	0.133	0.129	0.001	0.1455	14	1	2	0	0	1	0	0	3	236.274	4.1388	14	3	0	0	0	0	0	0.1	20	1	0	83.552	30	0	0	0	0	0	0	2	1
Flecainide	ZINC000003830842	Benzene and substituted derivatives	Benzoic acids and derivatives	440	-6.47	-7.20916	-7.5	6.47	7.20916	7.5	1.8805	1.12542	0.011	0.084	0.031	0.509	0.265	11	6	1	1	0	3	0	0	2	414.346	9.108	24	4	2	1	0	0	1	0.344828	29	1	0	106.835	48	6	0	0	0	0	6	2	3
Spizofurone	ZINC000000002075	Benzofurans	?	441	-4.44	-6.13273	-6.1	4.44	6.13273	6.1	1.50844	1.05447	0.664	0.535	0.538	0.344	0.4725	10	2	0	0	1	2	0	0	3	202.209	3.439	13	3	0	0	0	0	0	0.0588235	17	1	0	64.51	25	0	0	0	0	0	0	0	3
Spizofurone	ZINC000000002075	Benzofurans	?	442	-3.92	-6.70417	-6.7	3.92	6.70417	6.7	1.70556	1.19935	0.883	0.236	0.229	0.431	0.4935	10	2	0	0	1	2	0	0	3	202.209	3.439	13	3	0	0	0	0	0	0.0588235	17	1	0	64.51	25	0	0	0	0	0	0	0	3
Spizofurone	ZINC000000002075	Benzofurans	?	443	-4.46	-6.13983	-6.1	4.46	6.13983	6.1	1.81763	1.27686	0.652	0.531	0.538	0.478	0.5365	10	2	0	0	1	2	0	0	3	202.209	3.439	13	3	0	0	0	0	0	0.0588235	17	1	0	64.51	25	0	0	0	0	0	0	0	3
Loxoprofen	ZINC000001846128	Phenylpropanoic acids	?	444	-4.27	-6.21744	-6.2	4.27	6.21744	6.2	2.34726	1.55255	0.751	0.483	0.474	0.711	0.66175	11	4	0	0	0	3	0	0	2	245.298	6.0349	19	3	0	1	1	0	0	0.210526	19	0	0	85.9075	35	0	0	0	0	0	0	0	3
Loxoprofen	ZINC000001846128	Phenylpropanoic acids	?	445	-4.38	-6.79931	-6.8	4.38	6.79931	6.8	2.2584	1.09908	0.698	0.199	0.194	0.68	0.563	11	4	0	0	0	3	0	0	2	245.298	6.0349	19	3	0	1	1	0	0	0.210526	19	0	0	85.9075	35	0	0	0	0	0	0	0	3
Loxoprofen	ZINC000001846128	Phenylpropanoic acids	?	446	-4.56	-6.81057	-6.8	4.56	6.81057	6.8	2.19513	1.05432	0.601	0.195	0.194	0.655	0.52625	11	4	0	0	0	3	0	0	2	245.298	6.0349	19	3	0	1	1	0	0	0.210526	19	0	0	85.9075	35	0	0	0	0	0	0	0	3
Isoprofen	ZINC000001846287	Indanes	?	447	-4.06	-6.58268	-6.6	4.06	6.58268	6.6	2.9167	2.03151	0.836	0.286	0.268	0.91	0.731	9	6	0	0	0	2	0	0	2	231.315	7.1505	20	2	0	1	1	0	0	0.166667	18	0	0	87.9805	36	0	0	0	0	0	0	0	2
Isoprofen	ZINC000001846287	Indanes	?	448	-4.16	-5.78992	-5.8	4.16	5.78992	5.8	2.8382	1.49158	0.798	0.729	0.715	0.89	0.82325	9	6	0	0	0	2	0	0	2	231.315	7.1505	20	2	0	1	1	0	0	0.166667	18	0	0	87.9805	36	0	0	0	0	0	0	0	2
Isoprofen	ZINC000001846287	Indanes	?	449	-3.23	-6.70676	-6.7	3.23	6.70676	6.7	2.79159	1.45371	0.986	0.234	0.229	0.873	0.74025	9	6	0	0	0	2	0	0	2	231.315	7.1505	20	2	0	1	1	0	0	0.166667	18	0	0	87.9805	36	0	0	0	0	0	0	0	2
Phenytoin	ZINC000002510358	Azolidines	Imidazolidines	450	-4.04	-5.58505	-5.9	4.04	5.58505	5.9	1.47689	1.03711	0.844	0.827	0.662	0.333	0.543	15	0	2	0	0	2	0	0	3	252.273	4.0856	16	4	2	2	0	0	0	0.0952381	21	1	0	77.7262	31	0	0	0	0	0	0	2	2
Phenytoin	ZINC000002510358	Azolidines	Imidazolidines	451	-4.17	-6.65112	-6.6	4.17	6.65112	6.6	1.7595	1.19329	0.794	0.259	0.268	0.453	0.492	15	0	2	0	0	2	0	0	3	252.273	4.0856	16	4	2	2	0	0	0	0.0952381	21	1	0	77.7262	31	0	0	0	0	0	0	2	2
Phenytoin	ZINC000002510358	Azolidines	Imidazolidines	452	-4.87	-6.33781	-6.1	4.87	6.33781	6.1	1.74255	0.498063	0.429	0.415	0.538	0.448	0.46575	15	0	2	0	0	2	0	0	3	252.273	4.0856	16	4	2	2	0	0	0	0.0952381	21	1	0	77.7262	31	0	0	0	0	0	0	2	2
Phenyramidol	ZINC000022910917	Pyridines and derivatives	Aminopyridines and derivatives	453	-4.88	-7.04142	-6.9	4.88	7.04142	6.9	2.38401	1.4101	0.422	0.118	0.158	0.725	0.5075	11	2	1	1	0	1	0	0	2	214.268	4.2364	17	3	2	2	0	1	0	0.235294	17	1	0	79.0402	30	0	0	0	0	0	0	2	1
Phenyramidol	ZINC000022910917	Pyridines and derivatives	Aminopyridines and derivatives	454	-4.69	-7.04809	-6.9	4.69	7.04809	6.9	2.57774	1.62545	0.528	0.116	0.158	0.796	0.5695	11	2	1	1	0	1	0	0	2	214.268	4.2364	17	3	2	2	0	1	0	0.235294	17	1	0	79.0402	30	0	0	0	0	0	0	2	1
Phenyramidol	ZINC000022910917	Pyridines and derivatives	Aminopyridines and derivatives	455	-5.45	-6.80417	-6.7	5.45	6.80417	6.7	2.454	1.54257	0.159	0.197	0.229	0.752	0.473	11	2	1	1	0	1	0	0	2	214.268	4.2364	17	3	2	2	0	1	0	0.235294	17	1	0	79.0402	30	0	0	0	0	0	0	2	1
Picilorex	ZINC000031519739	Pyrrolidines	Phenylpyrrolidines	456	-4.54	-5.17858	-5.2	4.54	5.17858	5.2	0.90783	0.617519	0.614	0.94	0.933	0.08	0.42675	13	1	1	0	0	0	0	0	3	235.758	7.6509	18	0	1	0	0	0	1	0.111111	18	1	0	86.3153	34	1	0	0	1	0	0	1	0
Picilorex	ZINC000031519739	Pyrrolidines	Phenylpyrrolidines	457	-4.35	-5.92082	-5.9	4.35	5.92082	5.9	1.23474	0.325698	0.713	0.659	0.662	0.216	0.45175	13	1	1	0	0	0	0	0	3	235.758	7.6509	18	0	1	0	0	0	1	0.111111	18	1	0	86.3153	34	1	0	0	1	0	0	1	0
Picilorex	ZINC000031519739	Pyrrolidines	Phenylpyrrolidines	458	-4.16	-5.17578	-5.2	4.16	5.17578	5.2	1.12317	0.755054	0.798	0.94	0.933	0.161	0.51325	13	1	1	0	0	0	0	0	3	235.758	7.6509	18	0	1	0	0	0	1	0.111111	18	1	0	86.3153	34	1	0	0	1	0	0	1	0
Levomenol	ZINC000001849758	Prenol lipids	Sesquiterpenoids	459	-3.93	-6.25822	-6.3	3.93	6.25822	6.3	1.38485	0.847237	0.88	0.459	0.421	0.288	0.46925	6	9	0	0	0	1	0	0	1	222.372	7.8886	27	1	1	1	0	1	0	0.25	16	0	0	100.177	42	0	0	0	0	0	0	0	1
Levomenol	ZINC000001849758	Prenol lipids	Sesquiterpenoids	460	-4.35	-6.51727	-6.1	4.35	6.51727	6.1	1.45445	0.740851	0.713	0.318	0.538	0.319	0.47225	6	9	0	0	0	1	0	0	1	222.372	7.8886	27	1	1	1	0	1	0	0.25	16	0	0	100.177	42	0	0	0	0	0	0	0	1
Levomenol	ZINC000001849758	Prenol lipids	Sesquiterpenoids	461	-3.86	-6.21611	-6.1	3.86	6.21611	6.1	1.47634	0.768191	0.9	0.485	0.538	0.332	0.5255	6	9	0	0	0	1	0	0	1	222.372	7.8886	27	1	1	1	0	1	0	0.25	16	0	0	100.177	42	0	0	0	0	0	0	0	1
Fluoxetine	ZINC000001530638	Benzene and substituted derivatives	Trifluoromethylbenzenes	462	-5.33	-7.01995	-7.1	5.33	7.01995	7.1	2.92746	0.934141	0.2	0.123	0.101	0.913	0.53175	12	5	0	1	0	1	0	0	2	309.331	8.1339	19	1	1	0	0	0	1	0.304348	23	0	0	99.8351	40	3	0	0	0	0	3	1	1
Fluoxetine	ZINC000001530638	Benzene and substituted derivatives	Trifluoromethylbenzenes	463	-4.85	-6.41052	-6.7	4.85	6.41052	6.7	1.22934	0.83973	0.44	0.374	0.229	0.213	0.27375	12	5	0	1	0	1	0	0	2	309.331	8.1339	19	1	1	0	0	0	1	0.304348	23	0	0	99.8351	40	3	0	0	0	0	3	1	1
Fluoxetine	ZINC000001530638	Benzene and substituted derivatives	Trifluoromethylbenzenes	464	-5.28	-6.41988	-6.4	5.28	6.41988	6.4	2.81838	1.97412	0.217	0.37	0.362	0.883	0.58625	12	5	0	1	0	1	0	0	2	309.331	8.1339	19	1	1	0	0	0	1	0.304348	23	0	0	99.8351	40	3	0	0	0	0	3	1	1
Pentapiperide	ZINC000000155897	Benzene and substituted derivatives	Phenylpropanes	465	-3.13	-6.48607	-6.6	3.13	6.48607	6.6	2.82605	1.78938	0.993	0.335	0.268	0.885	0.75775	11	7	1	0	0	2	0	0	2	289.419	9.0512	29	2	1	1	0	0	1	0.272727	22	1	0	113.634	48	0	0	0	0	0	0	1	2
Pentapiperide	ZINC000000155897	Benzene and substituted derivatives	Phenylpropanes	466	-3.4	-5.77538	-5.8	3.4	5.77538	5.8	2.09974	1.4482	0.978	0.737	0.715	0.613	0.72975	11	7	1	0	0	2	0	0	2	289.419	9.0512	29	2	1	1	0	0	1	0.272727	22	1	0	113.634	48	0	0	0	0	0	0	1	2
Pentapiperide	ZINC000000155897	Benzene and substituted derivatives	Phenylpropanes	467	-3.86	-5.65272	-5.7	3.86	5.65272	5.7	2.92568	1.99442	0.9	0.795	0.763	0.912	0.87175	11	7	1	0	0	2	0	0	2	289.419	9.0512	29	2	1	1	0	0	1	0.272727	22	1	0	113.634	48	0	0	0	0	0	0	1	2
Setazindol	ZINC000000014718	Benzene and substituted derivatives	Diphenylmethanes	468	-4.54	-6.02748	-5.9	4.54	6.02748	5.9	2.61861	1.69048	0.614	0.594	0.662	0.811	0.7245	12	3	0	1	0	1	0	0	2	261.752	5.9807	17	1	2	1	0	1	1	0.210526	19	0	0	93.0549	34	1	0	0	1	0	0	1	1
Setazindol	ZINC000000014718	Benzene and substituted derivatives	Diphenylmethanes	469	-5.2	-6.3665	-6.4	5.2	6.3665	6.4	2.90005	1.93471	0.252	0.399	0.362	0.905	0.606	12	3	0	1	0	1	0	0	2	261.752	5.9807	17	1	2	1	0	1	1	0.210526	19	0	0	93.0549	34	1	0	0	1	0	0	1	1
Setazindol	ZINC000000014718	Benzene and substituted derivatives	Diphenylmethanes	470	-5.43	-6.02616	-5.9	5.43	6.02616	5.9	2.86019	1.75752	0.165	0.595	0.662	0.895	0.65425	12	3	0	1	0	1	0	0	2	261.752	5.9807	17	1	2	1	0	1	1	0.210526	19	0	0	93.0549	34	1	0	0	1	0	0	1	1
Fludorex	ZINC000002018873	Benzene and substituted derivatives	Trifluoromethylbenzenes	471	-4.17	-5.62708	-5.7	4.17	5.62708	5.7	2.62824	1.74546	0.794	0.81	0.763	0.815	0.79675	6	5	0	1	0	1	0	0	1	233.233	6.1668	15	1	1	0	0	0	1	0.3125	16	0	0	70.6791	30	3	0	0	0	0	3	1	1
Fludorex	ZINC000002018873	Benzene and substituted derivatives	Trifluoromethylbenzenes	472	-3.94	-6.01928	-6	3.94	6.01928	6	2.37589	1.52642	0.877	0.6	0.6	0.721	0.72975	6	5	0	1	0	1	0	0	1	233.233	6.1668	15	1	1	0	0	0	1	0.3125	16	0	0	70.6791	30	3	0	0	0	0	3	1	1
Fludorex	ZINC000002018873	Benzene and substituted derivatives	Trifluoromethylbenzenes	473	-4.32	-5.92849	-5.8	4.32	5.92849	5.8	2.77874	1.07708	0.729	0.652	0.715	0.869	0.7955	6	5	0	1	0	1	0	0	1	233.233	6.1668	15	1	1	0	0	0	1	0.3125	16	0	0	70.6791	30	3	0	0	0	0	3	1	1
Cifenline	ZINC000000002266	Benzene and substituted derivatives	Diphenylmethanes	474	-4.23	-4.48165	-4.5	4.23	4.48165	4.5	3.03055	1.42112	0.768	0.992	0.99	0.94	0.9095	18	0	2	0	0	0	0	0	4	262.356	6.186	20	2	1	1	0	0	1	0.130435	23	1	0	95.9748	38	0	0	0	0	0	0	2	0
Inicarone	ZINC000000001569	Benzofurans	?	475	-4.6	-6.24325	-6.3	4.6	6.24325	6.3	2.1283	1.46703	0.575	0.466	0.421	0.627	0.5625	13	4	1	0	1	1	0	0	3	265.312	6.2641	17	3	0	0	0	0	0	0.136364	22	2	0	94.3185	35	0	0	0	0	0	0	1	2
Inicarone	ZINC000000001569	Benzofurans	?	476	-4.75	-7.07649	-7.1	4.75	7.07649	7.1	2.24329	1.57624	0.495	0.11	0.101	0.675	0.4865	13	4	1	0	1	1	0	0	3	265.312	6.2641	17	3	0	0	0	0	0	0.136364	22	2	0	94.3185	35	0	0	0	0	0	0	1	2
Inicarone	ZINC000000001569	Benzofurans	?	477	-4.6	-5.4274	-5.4	4.6	5.4274	5.4	2.00952	1.40195	0.575	0.884	0.888	0.568	0.64975	13	4	1	0	1	1	0	0	3	265.312	6.2641	17	3	0	0	0	0	0	0.136364	22	2	0	94.3185	35	0	0	0	0	0	0	1	2
Benzphetamine	ZINC000000968306	Benzene and substituted derivatives	Phenethylamines	478	-4.27	-6.28444	-6.2	4.27	6.28444	6.2	0.748561	0.396229	0.751	0.445	0.474	0.042	0.32725	12	5	0	1	0	0	0	0	2	239.362	7.7743	21	0	1	1	0	0	1	0.263158	19	0	0	101.474	39	0	0	0	0	0	0	1	0
Benzphetamine	ZINC000000968306	Benzene and substituted derivatives	Phenethylamines	479	-4.24	-6.29974	-6.2	4.24	6.29974	6.2	1.18423	0.660852	0.764	0.436	0.474	0.19	0.4045	12	5	0	1	0	0	0	0	2	239.362	7.7743	21	0	1	1	0	0	1	0.263158	19	0	0	101.474	39	0	0	0	0	0	0	1	0
Benzphetamine	ZINC000000968306	Benzene and substituted derivatives	Phenethylamines	480	-4.38	-6.87017	-6.9	4.38	6.87017	6.9	1.17341	0.151553	0.698	0.173	0.158	0.187	0.3075	12	5	0	1	0	0	0	0	2	239.362	7.7743	21	0	1	1	0	0	1	0.263158	19	0	0	101.474	39	0	0	0	0	0	0	1	0
Pentafluranol	ZINC000000000592	Stilbenes	?	481	-5.18	-6.87745	-6.7	5.18	6.87745	6.7	3.02173	1.8876	0.264	0.17	0.229	0.937	0.59175	12	5	0	0	0	2	0	0	2	346.295	6.3513	17	2	2	2	0	0	0	0.2	25	0	0	95.807	39	5	0	0	0	0	5	0	2
Pentafluranol	ZINC000000000592	Stilbenes	?	482	-4.75	-6.99021	-6.7	4.75	6.99021	6.7	3.03853	2.11607	0.495	0.134	0.229	0.942	0.652	12	5	0	0	0	2	0	0	2	346.295	6.3513	17	2	2	2	0	0	0	0.2	25	0	0	95.807	39	5	0	0	0	0	5	0	2
Pentafluranol	ZINC000000000592	Stilbenes	?	483	-4.49	-6.87008	-6.7	4.49	6.87008	6.7	2.97566	1.5042	0.638	0.173	0.229	0.926	0.67975	12	5	0	0	0	2	0	0	2	346.295	6.3513	17	2	2	2	0	0	0	0.2	25	0	0	95.807	39	5	0	0	0	0	5	0	2
Trimexiline	ZINC000033827808	Benzene and substituted derivatives	Phenylmethylamines	484	-3.97	-6.18191	-6.1	3.97	6.18191	6.1	1.36574	0.936281	0.868	0.505	0.538	0.279	0.491	6	11	0	1	0	0	0	0	1	247.426	10.2207	29	0	1	0	0	0	1	0.388889	18	0	0	114.573	47	0	0	0	0	0	0	1	0
Trimexiline	ZINC000033827808	Benzene and substituted derivatives	Phenylmethylamines	485	-4.03	-6.16156	-6.2	4.03	6.16156	6.2	1.20763	0.789821	0.847	0.517	0.474	0.202	0.43125	6	11	0	1	0	0	0	0	1	247.426	10.2207	29	0	1	0	0	0	1	0.388889	18	0	0	114.573	47	0	0	0	0	0	0	1	0
Trimexiline	ZINC000033827808	Benzene and substituted derivatives	Phenylmethylamines	486	-4.39	-6.14442	-6.1	4.39	6.14442	6.1	1.37697	0.875102	0.692	0.528	0.538	0.284	0.4495	6	11	0	1	0	0	0	0	1	247.426	10.2207	29	0	1	0	0	0	1	0.388889	18	0	0	114.573	47	0	0	0	0	0	0	1	0
Meseclazone	ZINC000005573063	Benzoxazines	?	487	-4.32	-6.67103	-6.7	4.32	6.67103	6.7	1.44448	0.742677	0.729	0.25	0.229	0.316	0.3975	10	1	1	0	2	1	0	0	3	239.658	4.3736	14	4	0	0	0	0	0	0	18	2	0	65.8557	26	1	0	0	1	0	0	1	3
Meseclazone	ZINC000005573063	Benzoxazines	?	488	-4.2	-6.599	-6.7	4.2	6.599	6.7	0.163396	0.0750019	0.781	0.278	0.229	0	0.2525	10	1	1	0	2	1	0	0	3	239.658	4.3736	14	4	0	0	0	0	0	0	18	2	0	65.8557	26	1	0	0	1	0	0	1	3
Meseclazone	ZINC000005573063	Benzoxazines	?	489	-4.32	-6.28875	-6.4	4.32	6.28875	6.4	1.26482	0.691997	0.729	0.443	0.362	0.229	0.38725	10	1	1	0	2	1	0	0	3	239.658	4.3736	14	4	0	0	0	0	0	0	18	2	0	65.8557	26	1	0	0	1	0	0	1	3
Telbivudine	ZINC000005765078	Pyrimidine nucleosides	Pyrimidine 2-deoxyribonucleosides	490	-5.39	-5.81523	-5.6	5.39	5.81523	5.6	3.0466	1.92388	0.178	0.718	0.81	0.943	0.7185	0	0	0	0	0	0	0	0	2	242.231	1.0721	19	6	3	3	0	2	0	0.111111	18	2	0	73.453	31	0	0	0	0	0	0	2	5
Telbivudine	ZINC000005765078	Pyrimidine nucleosides	Pyrimidine 2-deoxyribonucleosides	491	-5.33	-6.30156	-6	5.33	6.30156	6	1.02263	0.47931	0.2	0.435	0.6	0.117	0.2585	0	0	0	0	0	0	0	0	2	242.231	1.0721	19	6	3	3	0	2	0	0.111111	18	2	0	73.453	31	0	0	0	0	0	0	2	5
Telbivudine	ZINC000005765078	Pyrimidine nucleosides	Pyrimidine 2-deoxyribonucleosides	492	-5.4	-5.50401	-5.2	5.4	5.50401	5.2	2.39784	1.57218	0.176	0.857	0.933	0.731	0.64275	0	0	0	0	0	0	0	0	2	242.231	1.0721	19	6	3	3	0	2	0	0.111111	18	2	0	73.453	31	0	0	0	0	0	0	2	5
Furofenac	ZINC000005651200	Coumarans	?	493	-3.89	-6.22086	-6.2	3.89	6.22086	6.2	2.74735	1.83369	0.891	0.48	0.474	0.857	0.76975	8	4	0	0	1	2	0	0	2	205.233	5.0183	15	3	0	1	1	0	0	0.1875	16	1	0	68.7435	28	0	0	0	0	0	0	0	3
Furofenac	ZINC000005651200	Coumarans	?	494	-3.74	-6.17467	-6.3	3.74	6.17467	6.3	2.88784	1.8872	0.927	0.51	0.421	0.901	0.7875	8	4	0	0	1	2	0	0	2	205.233	5.0183	15	3	0	1	1	0	0	0.1875	16	1	0	68.7435	28	0	0	0	0	0	0	0	3
Furofenac	ZINC000005651200	Coumarans	?	495	-3.83	-5.69614	-5.7	3.83	5.69614	5.7	2.70014	1.84539	0.906	0.773	0.763	0.837	0.83575	8	4	0	0	1	2	0	0	2	205.233	5.0183	15	3	0	1	1	0	0	0.1875	16	1	0	68.7435	28	0	0	0	0	0	0	0	3
Quifenadine	ZINC000001298963	Benzene and substituted derivatives	Diphenylmethanes	496	-3.16	-5.99928	-6	3.16	5.99928	6	2.6395	1.05724	0.991	0.609	0.6	0.82	0.80775	19	1	1	0	0	1	0	0	4	293.41	7.4664	24	1	2	2	0	1	1	0.12	25	2	0	112.649	45	0	0	0	0	0	0	1	1
Quifenadine	ZINC000001298963	Benzene and substituted derivatives	Diphenylmethanes	497	-3.34	-7.86657	-7.7	3.34	7.86657	7.7	3.11893	1.97104	0.983	0.01	0.016	0.958	0.72875	19	1	1	0	0	1	0	0	4	293.41	7.4664	24	1	2	2	0	1	1	0.12	25	2	0	112.649	45	0	0	0	0	0	0	1	1
Quifenadine	ZINC000001298963	Benzene and substituted derivatives	Diphenylmethanes	498	-3.46	-6.09705	-6	3.46	6.09705	6	1.88922	1.15174	0.972	0.556	0.6	0.514	0.65	19	1	1	0	0	1	0	0	4	293.41	7.4664	24	1	2	2	0	1	1	0.12	25	2	0	112.649	45	0	0	0	0	0	0	1	1
Ethybenztropine	ZINC000100203405	Benzene and substituted derivatives	Diphenylmethanes	499	-4.72	-4.57387	-4.7	4.72	4.57387	4.7	2.93376	1.3964	0.511	0.988	0.985	0.914	0.831	19	3	1	0	0	1	0	0	4	321.464	10.1938	28	1	1	1	0	0	1	0.185185	27	2	0	126.193	51	0	0	0	0	0	0	1	1
Ethybenztropine	ZINC000100203405	Benzene and substituted derivatives	Diphenylmethanes	500	-4.49	-4.67518	-4.7	4.49	4.67518	4.7	2.53047	1.76606	0.638	0.986	0.985	0.777	0.79425	19	3	1	0	0	1	0	0	4	321.464	10.1938	28	1	1	1	0	0	1	0.185185	27	2	0	126.193	51	0	0	0	0	0	0	1	1
Nafazatrom	ZINC000000001764	Naphthalenes	?	501	-5.4	-7.52205	-7.4	5.4	7.52205	7.4	1.0333	0.641931	0.176	0.034	0.045	0.121	0.11575	13	3	2	0	0	2	0	0	3	268.316	5.1463	20	4	0	0	0	0	0	0.181818	22	1	0	91.0254	36	0	0	0	0	0	0	2	2
Nafazatrom	ZINC000000001764	Naphthalenes	?	502	-5.53	-7.51109	-7.5	5.53	7.51109	7.5	0.808435	0.559535	0.134	0.034	0.031	0.054	0.06825	13	3	2	0	0	2	0	0	3	268.316	5.1463	20	4	0	0	0	0	0	0.181818	22	1	0	91.0254	36	0	0	0	0	0	0	2	2
Nafazatrom	ZINC000000001764	Naphthalenes	?	503	-5.22	-7.49912	-7.5	5.22	7.49912	7.5	0.840372	0.522207	0.243	0.036	0.031	0.062	0.0995	13	3	2	0	0	2	0	0	3	268.316	5.1463	20	4	0	0	0	0	0	0.181818	22	1	0	91.0254	36	0	0	0	0	0	0	2	2
Benzoclidine	ZINC000000135992	Benzene and substituted derivatives	Benzoic acids and derivatives	504	-4.59	-6.57222	-6.5	4.59	6.57222	6.5	1.36829	0.44851	0.581	0.29	0.313	0.279	0.363	13	1	1	0	0	2	0	0	3	231.295	5.9975	19	2	1	1	0	0	1	0.157895	19	2	0	81.9434	34	0	0	0	0	0	0	1	2
Benzoclidine	ZINC000000135992	Benzene and substituted derivatives	Benzoic acids and derivatives	505	-4.16	-6.57884	-6.6	4.16	6.57884	6.6	1.05827	0.611308	0.798	0.288	0.268	0.132	0.3325	13	1	1	0	0	2	0	0	3	231.295	5.9975	19	2	1	1	0	0	1	0.157895	19	2	0	81.9434	34	0	0	0	0	0	0	1	2
Benzoclidine	ZINC000000135992	Benzene and substituted derivatives	Benzoic acids and derivatives	506	-4.21	-5.86537	-5.9	4.21	5.86537	5.9	1.35918	0.950626	0.777	0.692	0.662	0.275	0.49725	13	1	1	0	0	2	0	0	3	231.295	5.9975	19	2	1	1	0	0	1	0.157895	19	2	0	81.9434	34	0	0	0	0	0	0	1	2
Lonaprofen	ZINC000001846409	Benzene and substituted derivatives	Phenoxyacetic acid derivatives	507	-4.34	-6.69531	-6.7	4.34	6.69531	6.7	0.800855	0.556529	0.719	0.239	0.229	0.052	0.263	10	4	0	0	0	3	0	0	2	264.708	5.9414	16	3	0	0	0	0	0	0.210526	19	0	0	84.897	31	1	0	0	1	0	0	0	3
Lonaprofen	ZINC000001846409	Benzene and substituted derivatives	Phenoxyacetic acid derivatives	508	-4.54	-6.69681	-6.7	4.54	6.69681	6.7	0.564349	0.383823	0.614	0.238	0.229	0.018	0.21975	10	4	0	0	0	3	0	0	2	264.708	5.9414	16	3	0	0	0	0	0	0.210526	19	0	0	84.897	31	1	0	0	1	0	0	0	3
Lonaprofen	ZINC000001846409	Benzene and substituted derivatives	Phenoxyacetic acid derivatives	509	-4.78	-6.69171	-6.7	4.78	6.69171	6.7	0.17042	0.113285	0.478	0.24	0.229	0	0.17675	10	4	0	0	0	3	0	0	2	264.708	5.9414	16	3	0	0	0	0	0	0.210526	19	0	0	84.897	31	1	0	0	1	0	0	0	3
Nitrafudam	ZINC000000001818	Benzene and substituted derivatives	Nitrobenzenes	510	-5.46	-5.37877	-5.5	5.46	5.37877	5.5	1.29248	0.421922	0.156	0.899	0.852	0.243	0.3735	10	1	0	3	1	2	0	0	2	231.211	4.3195	12	3	2	1	0	0	1	0.166667	18	1	0	71.2926	26	0	0	0	0	0	0	3	3
Nitrafudam	ZINC000000001818	Benzene and substituted derivatives	Nitrobenzenes	511	-5.03	-6.15542	-6	5.03	6.15542	6	1.20234	0.65943	0.342	0.522	0.6	0.2	0.3355	10	1	0	3	1	2	0	0	2	231.211	4.3195	12	3	2	1	0	0	1	0.166667	18	1	0	71.2926	26	0	0	0	0	0	0	3	3
Nitrafudam	ZINC000000001818	Benzene and substituted derivatives	Nitrobenzenes	512	-5	-5.4319	-6	5	5.4319	6	1.34403	0.113481	0.359	0.882	0.6	0.267	0.37325	10	1	0	3	1	2	0	0	2	231.211	4.3195	12	3	2	1	0	0	1	0.166667	18	1	0	71.2926	26	0	0	0	0	0	0	3	3
Trifluridine	ZINC000000002219	Pyrimidine nucleosides	Pyrimidine 2-deoxyribonucleosides	513	-5.69	-6.04015	-6.4	5.69	6.04015	6.4	1.49608	0.351313	0.094	0.587	0.362	0.339	0.2835	4	1	2	0	0	2	0	0	2	296.201	1.2832	16	6	3	3	0	2	0	0.142857	21	2	0	70.318	31	3	0	0	0	0	3	2	5
Trifluridine	ZINC000000002219	Pyrimidine nucleosides	Pyrimidine 2-deoxyribonucleosides	514	-5.71	-6.18605	-6.5	5.71	6.18605	6.5	1.54042	0.23253	0.09	0.502	0.313	0.358	0.27975	4	1	2	0	0	2	0	0	2	296.201	1.2832	16	6	3	3	0	2	0	0.142857	21	2	0	70.318	31	3	0	0	0	0	3	2	5
Trifluridine	ZINC000000002219	Pyrimidine nucleosides	Pyrimidine 2-deoxyribonucleosides	515	-5.49	-6.52808	-6.2	5.49	6.52808	6.2	1.18698	0.209069	0.148	0.311	0.474	0.191	0.251	4	1	2	0	0	2	0	0	2	296.201	1.2832	16	6	3	3	0	2	0	0.142857	21	2	0	70.318	31	3	0	0	0	0	3	2	5
Piperphenidol	ZINC000000000632	Benzene and substituted derivatives	Phenylbutylamines	516	-4.67	-6.79554	-6.6	4.67	6.79554	6.6	1.40017	0.921312	0.538	0.201	0.268	0.296	0.3495	11	7	1	0	0	1	0	0	2	275.436	9.1866	30	1	2	2	0	1	1	0.285714	21	1	0	115.963	49	0	0	0	0	0	0	1	1
Piperphenidol	ZINC000000000632	Benzene and substituted derivatives	Phenylbutylamines	517	-4.23	-6.13895	-6	4.23	6.13895	6	1.66479	0.93965	0.768	0.531	0.6	0.41	0.547	11	7	1	0	0	1	0	0	2	275.436	9.1866	30	1	2	2	0	1	1	0.285714	21	1	0	115.963	49	0	0	0	0	0	0	1	1
Piperphenidol	ZINC000000000632	Benzene and substituted derivatives	Phenylbutylamines	518	-5.23	-6.34686	-6.2	5.23	6.34686	6.2	1.82229	1.20235	0.239	0.41	0.474	0.48	0.41825	11	7	1	0	0	1	0	0	2	275.436	9.1866	30	1	2	2	0	1	1	0.285714	21	1	0	115.963	49	0	0	0	0	0	0	1	1
Butidrine	ZINC000004212253	Tetralins	?	519	-5.06	-6.5556	-6.4	5.06	6.5556	6.4	1.71559	1.05435	0.326	0.298	0.362	0.435	0.3895	10	6	0	1	0	1	0	0	2	247.382	7.9733	26	1	2	1	0	1	1	0.263158	19	0	0	104.765	43	0	0	0	0	0	0	1	1
Butidrine	ZINC000004212253	Tetralins	?	520	-4.89	-6.54766	-6.4	4.89	6.54766	6.4	1.83775	1.01873	0.418	0.301	0.362	0.487	0.4385	10	6	0	1	0	1	0	0	2	247.382	7.9733	26	1	2	1	0	1	1	0.263158	19	0	0	104.765	43	0	0	0	0	0	0	1	1
Butidrine	ZINC000004212253	Tetralins	?	521	-4.72	-6.34974	-5.8	4.72	6.34974	5.8	1.81214	0.738623	0.511	0.408	0.715	0.476	0.5445	10	6	0	1	0	1	0	0	2	247.382	7.9733	26	1	2	1	0	1	1	0.263158	19	0	0	104.765	43	0	0	0	0	0	0	1	1
Benztropine	ZINC000100036536	Benzene and substituted derivatives	Diphenylmethanes	522	-4.7	-5.93764	-5.9	4.7	5.93764	5.9	2.63025	1.82875	0.522	0.645	0.662	0.817	0.7045	19	2	1	0	0	1	0	0	4	307.437	9.487	26	1	1	1	0	0	1	0.153846	26	2	0	119.272	48	0	0	0	0	0	0	1	1
Benztropine	ZINC000100036536	Benzene and substituted derivatives	Diphenylmethanes	523	-4.47	-5.94778	-5.9	4.47	5.94778	5.9	2.77887	1.94227	0.648	0.64	0.662	0.869	0.762	19	2	1	0	0	1	0	0	4	307.437	9.487	26	1	1	1	0	0	1	0.153846	26	2	0	119.272	48	0	0	0	0	0	0	1	1
Azepindole	ZINC000000000983	Indoles and derivatives	Indoles	524	-3.89	-5.5745	-5.6	3.89	5.5745	5.6	1.95114	1.37605	0.891	0.831	0.81	0.541	0.69575	12	0	2	0	0	0	0	0	3	186.258	5.2984	14	1	1	0	0	0	1	0	16	2	0	71.9143	28	0	0	0	0	0	0	2	0
Azepindole	ZINC000000000983	Indoles and derivatives	Indoles	525	-3.9	-5.9163	-5.9	3.9	5.9163	5.9	1.72495	1.19784	0.887	0.662	0.662	0.44	0.60725	12	0	2	0	0	0	0	0	3	186.258	5.2984	14	1	1	0	0	0	1	0	16	2	0	71.9143	28	0	0	0	0	0	0	2	0
Azepindole	ZINC000000000983	Indoles and derivatives	Indoles	526	-3.97	-6.39332	-6.4	3.97	6.39332	6.4	1.29064	0.877944	0.868	0.384	0.362	0.243	0.429	12	0	2	0	0	0	0	0	3	186.258	5.2984	14	1	1	0	0	0	1	0	16	2	0	71.9143	28	0	0	0	0	0	0	2	0
Riluzole	ZINC000000006481	Benzothiazoles	?	527	-5.04	-5.84969	-5.7	5.04	5.84969	5.7	2.97147	1.38945	0.336	0.7	0.763	0.924	0.73675	7	1	1	1	0	1	0	1	2	234.202	4.1557	8	4	1	0	0	0	0	0.125	16	1	0	55.8038	20	3	0	0	0	0	3	2	1
Riluzole	ZINC000000006481	Benzothiazoles	?	528	-5.02	-5.65146	-5.5	5.02	5.65146	5.5	2.73128	1.76131	0.346	0.796	0.852	0.849	0.724	7	1	1	1	0	1	0	1	2	234.202	4.1557	8	4	1	0	0	0	0	0.125	16	1	0	55.8038	20	3	0	0	0	0	3	2	1
Riluzole	ZINC000000006481	Benzothiazoles	?	529	-4.8	-5.64423	-5.5	4.8	5.64423	5.5	2.82149	1.47292	0.47	0.8	0.852	0.883	0.772	7	1	1	1	0	1	0	1	2	234.202	4.1557	8	4	1	0	0	0	0	0.125	16	1	0	55.8038	20	3	0	0	0	0	3	2	1
Bendazac	ZINC000000001000	Benzopyrazoles	Indazoles	530	-5.45	-6.72079	-6.7	5.45	6.72079	6.7	0.993944	0.26016	0.159	0.229	0.229	0.104	0.149	13	3	2	0	0	3	0	0	3	281.291	5.1297	16	5	0	1	1	0	0	0.217391	23	1	0	90.3515	34	0	0	0	0	0	0	2	3
Bendazac	ZINC000000001000	Benzopyrazoles	Indazoles	531	-4.88	-6.8297	-6.8	4.88	6.8297	6.8	1.45428	0.319595	0.422	0.185	0.194	0.319	0.3135	13	3	2	0	0	3	0	0	3	281.291	5.1297	16	5	0	1	1	0	0	0.217391	23	1	0	90.3515	34	0	0	0	0	0	0	2	3
Bendazac	ZINC000000001000	Benzopyrazoles	Indazoles	532	-5.39	-6.73457	-6.7	5.39	6.73457	6.7	1.39585	0.282844	0.178	0.225	0.229	0.294	0.24875	13	3	2	0	0	3	0	0	3	281.291	5.1297	16	5	0	1	1	0	0	0.217391	23	1	0	90.3515	34	0	0	0	0	0	0	2	3
Rolicyprine	ZINC000072266300	Carboxylic acids and derivatives	Amino acids, peptides, and analogues	533	-4.83	-6.05199	-6.1	4.83	6.05199	6.1	2.57063	1.70595	0.451	0.581	0.538	0.792	0.64325	13	1	1	1	0	2	0	0	3	244.294	4.9548	20	4	1	0	0	0	0	0.15	20	1	0	81.336	34	0	0	0	0	0	0	2	2
Rolicyprine	ZINC000072266300	Carboxylic acids and derivatives	Amino acids, peptides, and analogues	534	-4.46	-5.97651	-6.2	4.46	5.97651	6.2	3.0098	2.11461	0.652	0.622	0.474	0.935	0.749	13	1	1	1	0	2	0	0	3	244.294	4.9548	20	4	1	0	0	0	0	0.15	20	1	0	81.336	34	0	0	0	0	0	0	2	2
Rolicyprine	ZINC000072266300	Carboxylic acids and derivatives	Amino acids, peptides, and analogues	535	-4.95	-6.75104	-6.7	4.95	6.75104	6.7	2.71015	1.87713	0.384	0.218	0.229	0.84	0.57325	13	1	1	1	0	2	0	0	3	244.294	4.9548	20	4	1	0	0	0	0	0.15	20	1	0	81.336	34	0	0	0	0	0	0	2	2
Pheneturide	ZINC000000000274	Benzene and substituted derivatives	Phenylacetamides	536	-4.29	-5.65895	-5.7	4.29	5.65895	5.7	2.59052	1.82354	0.743	0.79	0.763	0.8	0.7765	6	5	0	2	0	2	0	0	1	206.245	4.6988	18	4	2	1	0	0	0	0.333333	15	0	0	71.4492	29	0	0	0	0	0	0	2	2
Pheneturide	ZINC000000000274	Benzene and substituted derivatives	Phenylacetamides	537	-4.37	-5.77611	-5.8	4.37	5.77611	5.8	2.83079	1.97606	0.702	0.736	0.715	0.887	0.79775	6	5	0	2	0	2	0	0	1	206.245	4.6988	18	4	2	1	0	0	0	0.333333	15	0	0	71.4492	29	0	0	0	0	0	0	2	2
Pheneturide	ZINC000000000274	Benzene and substituted derivatives	Phenylacetamides	538	-4.96	-6.00524	-6	4.96	6.00524	6	2.36417	1.62916	0.378	0.605	0.6	0.718	0.6035	6	5	0	2	0	2	0	0	1	206.245	4.6988	18	4	2	1	0	0	0	0.333333	15	0	0	71.4492	29	0	0	0	0	0	0	2	2
Nadoxolol	ZINC000004213923	Naphthalenes	?	539	-5.27	-6.40627	-6.1	5.27	6.40627	6.1	1.70048	0.990386	0.221	0.376	0.538	0.428	0.40375	10	4	0	2	0	3	0	0	2	260.293	5.1761	21	5	3	2	0	1	1	0.25	20	0	0	90.1118	35	0	0	0	0	0	0	2	3
Nadoxolol	ZINC000004213923	Naphthalenes	?	540	-5.31	-6.70456	-6.4	5.31	6.70456	6.4	1.6512	0.867101	0.204	0.236	0.362	0.402	0.3425	10	4	0	2	0	3	0	0	2	260.293	5.1761	21	5	3	2	0	1	1	0.25	20	0	0	90.1118	35	0	0	0	0	0	0	2	3
Nadoxolol	ZINC000004213923	Naphthalenes	?	541	-5.58	-6.60442	-6.4	5.58	6.60442	6.4	1.82153	1.05134	0.117	0.276	0.362	0.479	0.35925	10	4	0	2	0	3	0	0	2	260.293	5.1761	21	5	3	2	0	1	1	0.25	20	0	0	90.1118	35	0	0	0	0	0	0	2	3
Ibufenac	ZINC000000001549	Benzene and substituted derivatives	Phenylpropanes	542	-3.67	-5.84718	-5.9	3.67	5.84718	5.9	1.01483	0.416305	0.94	0.701	0.662	0.114	0.4575	6	6	0	0	0	2	0	0	1	191.25	5.5442	16	2	0	1	1	0	0	0.285714	14	0	0	71.2865	29	0	0	0	0	0	0	0	2
Ibufenac	ZINC000000001549	Benzene and substituted derivatives	Phenylpropanes	543	-3.7	-5.57542	-5.7	3.7	5.57542	5.7	1.90922	0.440314	0.934	0.831	0.763	0.525	0.68675	6	6	0	0	0	2	0	0	1	191.25	5.5442	16	2	0	1	1	0	0	0.285714	14	0	0	71.2865	29	0	0	0	0	0	0	0	2
Ibufenac	ZINC000000001549	Benzene and substituted derivatives	Phenylpropanes	544	-3.53	-5.75865	-5.8	3.53	5.75865	5.8	1.06491	0.123197	0.963	0.745	0.715	0.135	0.487	6	6	0	0	0	2	0	0	1	191.25	5.5442	16	2	0	1	1	0	0	0.285714	14	0	0	71.2865	29	0	0	0	0	0	0	0	2
Tiaprofenic-acid	ZINC000000000767	Organooxygen compounds	Carbonyl compounds	545	-4.8	-6.64172	-6.6	4.8	6.64172	6.6	2.60736	1.34544	0.47	0.263	0.268	0.806	0.5875	10	4	0	0	0	3	0	1	2	259.306	4.9844	13	4	0	1	1	0	0	0.210526	19	1	0	80.23	29	0	0	0	0	0	0	0	3
Tiaprofenic-acid	ZINC000000000767	Organooxygen compounds	Carbonyl compounds	546	-5.17	-6.87498	-6.9	5.17	6.87498	6.9	0.483196	0.29926	0.269	0.171	0.158	0.01	0.11175	10	4	0	0	0	3	0	1	2	259.306	4.9844	13	4	0	1	1	0	0	0.210526	19	1	0	80.23	29	0	0	0	0	0	0	0	3
Tiaprofenic-acid	ZINC000000000767	Organooxygen compounds	Carbonyl compounds	547	-5.35	-6.362	-6.4	5.35	6.362	6.4	1.01126	0.0922295	0.191	0.402	0.362	0.112	0.19425	10	4	0	0	0	3	0	1	2	259.306	4.9844	13	4	0	1	1	0	0	0.210526	19	1	0	80.23	29	0	0	0	0	0	0	0	3
Felbinac	ZINC000000002318	Benzene and substituted derivatives	Biphenyls and derivatives	548	-4.2	-6.7666	-6.8	4.2	6.7666	6.8	1.02076	0.323932	0.781	0.212	0.194	0.116	0.30175	12	2	0	0	0	2	0	0	2	211.24	4.8981	12	2	0	1	1	0	0	0.176471	17	0	0	73.1075	27	0	0	0	0	0	0	0	2
Felbinac	ZINC000000002318	Benzene and substituted derivatives	Biphenyls and derivatives	549	-4.19	-6.76851	-6.8	4.19	6.76851	6.8	0.40602	0.222025	0.784	0.211	0.194	0.005	0.247	12	2	0	0	0	2	0	0	2	211.24	4.8981	12	2	0	1	1	0	0	0.176471	17	0	0	73.1075	27	0	0	0	0	0	0	0	2
Felbinac	ZINC000000002318	Benzene and substituted derivatives	Biphenyls and derivatives	550	-4.19	-6.75963	-6.8	4.19	6.75963	6.8	0.749474	0.135779	0.784	0.214	0.194	0.042	0.2655	12	2	0	0	0	2	0	0	2	211.24	4.8981	12	2	0	1	1	0	0	0.176471	17	0	0	73.1075	27	0	0	0	0	0	0	0	2
Levomenol	ZINC000001849758	Prenol lipids	Sesquiterpenoids	551	-3.85	-6.28184	-6.2	3.85	6.28184	6.2	1.45955	0.845888	0.901	0.446	0.474	0.322	0.50475	6	9	0	0	0	1	0	0	1	222.372	7.8886	27	1	1	1	0	1	0	0.25	16	0	0	100.177	42	0	0	0	0	0	0	0	1
Levomenol	ZINC000001849758	Prenol lipids	Sesquiterpenoids	552	-4.5	-6.42981	-6.3	4.5	6.42981	6.3	1.46143	0.913439	0.634	0.366	0.421	0.324	0.42575	6	9	0	0	0	1	0	0	1	222.372	7.8886	27	1	1	1	0	1	0	0.25	16	0	0	100.177	42	0	0	0	0	0	0	0	1
Levomenol	ZINC000001849758	Prenol lipids	Sesquiterpenoids	553	-4	-6.27466	-6.2	4	6.27466	6.2	1.48235	0.975053	0.86	0.45	0.474	0.334	0.5005	6	9	0	0	0	1	0	0	1	222.372	7.8886	27	1	1	1	0	1	0	0.25	16	0	0	100.177	42	0	0	0	0	0	0	0	1
Fipamezole	ZINC000003612873	Indanes	?	554	-4.7	-7.25468	-7.2	4.7	7.25468	7.2	1.4585	1.02065	0.522	0.075	0.08	0.321	0.311	12	2	2	0	0	0	0	0	3	230.286	5.6058	16	1	1	1	0	0	0	0.105263	19	1	0	80.9154	32	1	0	0	0	0	1	2	0
Fipamezole	ZINC000003612873	Indanes	?	555	-4.69	-7.23491	-7.3	4.69	7.23491	7.3	1.46873	0.98226	0.528	0.076	0.061	0.328	0.31125	12	2	2	0	0	0	0	0	3	230.286	5.6058	16	1	1	1	0	0	0	0.105263	19	1	0	80.9154	32	1	0	0	0	0	1	2	0
Fipamezole	ZINC000003612873	Indanes	?	556	-4.24	-6.23423	-6.2	4.24	6.23423	6.2	1.41801	0.985404	0.764	0.47	0.474	0.303	0.461	12	2	2	0	0	0	0	0	3	230.286	5.6058	16	1	1	1	0	0	0	0.105263	19	1	0	80.9154	32	1	0	0	0	0	1	2	0
Berlafenone	ZINC000002019970	Benzene and substituted derivatives	Biphenyls and derivatives	557	-6.07	-6.82232	-6.7	6.07	6.82232	6.7	1.89037	1.15736	0.037	0.19	0.229	0.515	0.324	12	7	0	1	0	2	0	0	2	299.414	8.1164	27	2	2	1	0	1	1	0.304348	23	0	0	119.14	47	0	0	0	0	0	0	1	2
Berlafenone	ZINC000002019970	Benzene and substituted derivatives	Biphenyls and derivatives	558	-5.38	-6.95128	-6.8	5.38	6.95128	6.8	2.05061	1.22024	0.182	0.145	0.194	0.588	0.388	12	7	0	1	0	2	0	0	2	299.414	8.1164	27	2	2	1	0	1	1	0.304348	23	0	0	119.14	47	0	0	0	0	0	0	1	2
Berlafenone	ZINC000002019970	Benzene and substituted derivatives	Biphenyls and derivatives	559	-5.3	-6.65217	-6.6	5.3	6.65217	6.6	2.20357	0.927607	0.208	0.258	0.268	0.659	0.4485	12	7	0	1	0	2	0	0	2	299.414	8.1164	27	2	2	1	0	1	1	0.304348	23	0	0	119.14	47	0	0	0	0	0	0	1	2
Bifluranol	ZINC000004212152	Stilbenes	?	560	-5.15	-7.33162	-7.1	5.15	7.33162	7.1	2.50959	1.6694	0.281	0.06	0.101	0.772	0.4815	15	2	0	0	0	2	0	0	3	292.325	6.2486	20	2	2	2	0	0	0	0.181818	22	0	0	98.787	39	2	0	0	0	0	2	0	2
Bifluranol	ZINC000004212152	Stilbenes	?	561	-5.28	-7.26849	-7.2	5.28	7.26849	7.2	2.03464	1.1152	0.217	0.072	0.08	0.58	0.36425	12	5	0	0	0	2	0	0	2	292.325	6.2486	20	2	2	2	0	0	0	0.181818	22	0	0	98.787	39	2	0	0	0	0	2	0	2
Bifluranol	ZINC000004212152	Stilbenes	?	562	-4.05	-7.61151	-7.3	4.05	7.61151	7.3	1.89871	1.09211	0.839	0.025	0.061	0.521	0.4855	12	5	0	0	0	2	0	0	2	292.325	6.2486	20	2	2	2	0	0	0	0.181818	22	0	0	98.787	39	2	0	0	0	0	2	0	2
Prolintane	ZINC000001481908	Benzene and substituted derivatives	Phenethylamines	563	-3.79	-6.03149	-6	3.79	6.03149	6	2.7477	1.92271	0.915	0.592	0.6	0.858	0.80775	10	5	1	0	0	0	0	0	2	217.356	8.1369	23	0	1	1	0	0	1	0.294118	17	1	0	93.6999	39	0	0	0	0	0	0	1	0
Prolintane	ZINC000001481908	Benzene and substituted derivatives	Phenethylamines	564	-3.64	-6.02339	-6	3.64	6.02339	6	1.98317	1.35858	0.947	0.597	0.6	0.554	0.66375	10	5	1	0	0	0	0	0	2	217.356	8.1369	23	0	1	1	0	0	1	0.294118	17	1	0	93.6999	39	0	0	0	0	0	0	1	0
Prolintane	ZINC000001481908	Benzene and substituted derivatives	Phenethylamines	565	-3.74	-6.04082	-6	3.74	6.04082	6	2.8134	1.96427	0.927	0.587	0.6	0.881	0.82225	10	5	1	0	0	0	0	0	2	217.356	8.1369	23	0	1	1	0	0	1	0.294118	17	1	0	93.6999	39	0	0	0	0	0	0	1	0
Cyprolidol	ZINC000001752005	Benzene and substituted derivatives	Diphenylmethanes	566	-5.09	-7.04948	-7	5.09	7.04948	7	2.4553	1.03832	0.31	0.115	0.129	0.752	0.48575	20	1	1	0	0	1	0	0	4	301.389	6.4485	21	2	1	1	0	1	0	0.153846	26	1	0	111.95	42	0	0	0	0	0	0	1	1
Cyprolidol	ZINC000001752005	Benzene and substituted derivatives	Diphenylmethanes	567	-4.9	-7.79429	-7.6	4.9	7.79429	7.6	2.05249	1.42808	0.413	0.015	0.024	0.589	0.40375	20	1	1	0	0	1	0	0	4	301.389	6.4485	21	2	1	1	0	1	0	0.153846	26	1	0	111.95	42	0	0	0	0	0	0	1	1
Nictindole	ZINC000000001801	Indoles and derivatives	Indolecarboxylic acids and derivatives	568	-4.91	-6.13896	-6.1	4.91	6.13896	6.1	2.02527	1.40159	0.409	0.531	0.538	0.577	0.52525	13	4	2	0	0	1	0	0	3	264.328	6.2134	18	2	1	1	0	0	0	0.136364	22	2	0	97.3659	36	0	0	0	0	0	0	2	1
Nictindole	ZINC000000001801	Indoles and derivatives	Indolecarboxylic acids and derivatives	569	-5.16	-6.30495	-6.3	5.16	6.30495	6.3	2.19995	1.51182	0.277	0.432	0.421	0.658	0.5035	13	4	2	0	0	1	0	0	3	264.328	6.2134	18	2	1	1	0	0	0	0.136364	22	2	0	97.3659	36	0	0	0	0	0	0	2	1
Nictindole	ZINC000000001801	Indoles and derivatives	Indolecarboxylic acids and derivatives	570	-5.42	-6.29316	-6.3	5.42	6.29316	6.3	2.1993	1.5045	0.169	0.44	0.421	0.657	0.476	13	4	2	0	0	1	0	0	3	264.328	6.2134	18	2	1	1	0	0	0	0.136364	22	2	0	97.3659	36	0	0	0	0	0	0	2	1
Xinidamine	ZINC000000002246	Benzopyrazoles	Indazoles	571	-5.41	-7.55712	-7.6	5.41	7.55712	7.6	2.73171	1.88025	0.173	0.03	0.024	0.849	0.47375	13	4	2	0	0	2	0	0	3	279.319	6.0696	17	4	0	1	1	0	0	0.130435	23	1	0	96.286	36	0	0	0	0	0	0	2	2
Xinidamine	ZINC000000002246	Benzopyrazoles	Indazoles	572	-5.58	-6.14472	-6.1	5.58	6.14472	6.1	2.56537	1.78336	0.117	0.527	0.538	0.79	0.55875	13	4	2	0	0	2	0	0	3	279.319	6.0696	17	4	0	1	1	0	0	0.130435	23	1	0	96.286	36	0	0	0	0	0	0	2	2
Xinidamine	ZINC000000002246	Benzopyrazoles	Indazoles	573	-5.62	-7.55524	-7.5	5.62	7.55524	7.5	2.58495	1.7921	0.107	0.03	0.031	0.798	0.4335	13	4	2	0	0	2	0	0	3	279.319	6.0696	17	4	0	1	1	0	0	0.130435	23	1	0	96.286	36	0	0	0	0	0	0	2	2
Benzhydryloxyethyl-diethyl-methylammonium	ZINC000005651729	Benzene and substituted derivatives	Diphenylmethanes	574	-4.6	-5.7373	-5.8	4.6	5.7373	5.8	2.76971	1.22332	0.575	0.753	0.715	0.866	0.7555	12	8	0	1	0	1	0	0	2	298.45	10.0514	29	1	0	0	0	0	1	0.347826	23	0	0	122.599	50	0	0	0	0	0	0	1	1
Benzhydryloxyethyl-diethyl-methylammonium	ZINC000005651729	Benzene and substituted derivatives	Diphenylmethanes	575	-4.24	-5.77696	-5.8	4.24	5.77696	5.8	2.64111	1.52646	0.764	0.735	0.715	0.821	0.78025	12	8	0	1	0	1	0	0	2	298.45	10.0514	29	1	0	0	0	0	1	0.347826	23	0	0	122.599	50	0	0	0	0	0	0	1	1
Benzhydryloxyethyl-diethyl-methylammonium	ZINC000005651729	Benzene and substituted derivatives	Diphenylmethanes	576	-4.56	-5.71565	-5.8	4.56	5.71565	5.8	2.5654	1.75088	0.601	0.766	0.715	0.79	0.724	12	8	0	1	0	1	0	0	2	298.45	10.0514	29	1	0	0	0	0	1	0.347826	23	0	0	122.599	50	0	0	0	0	0	0	1	1
Eslicarbazepine	ZINC000000896937	Benzazepines	Dibenzazepines	577	-4.92	-5.1091	-5	4.92	5.1091	5	1.25997	0.69132	0.403	0.95	0.963	0.227	0.455	14	1	1	1	0	2	0	0	3	254.289	5.1338	18	3	2	1	0	1	0	0.047619	21	1	0	84.9108	33	0	0	0	0	0	0	2	2
Eslicarbazepine	ZINC000000896937	Benzazepines	Dibenzazepines	578	-4.62	-6.80937	-6.6	4.62	6.80937	6.6	2.39879	1.63721	0.564	0.195	0.268	0.731	0.5735	14	1	1	1	0	2	0	0	3	254.289	5.1338	18	3	2	1	0	1	0	0.047619	21	1	0	84.9108	33	0	0	0	0	0	0	2	2
Eslicarbazepine	ZINC000000896937	Benzazepines	Dibenzazepines	579	-4.67	-6.83316	-6.6	4.67	6.83316	6.6	2.01522	1.22452	0.538	0.184	0.268	0.571	0.487	14	1	1	1	0	2	0	0	3	254.289	5.1338	18	3	2	1	0	1	0	0.047619	21	1	0	84.9108	33	0	0	0	0	0	0	2	2
Varenicline	ZINC000001481833	Benzazepines	?	580	-4.36	-6.07402	-6.1	4.36	6.07402	6.1	2.32767	1.63039	0.707	0.568	0.538	0.702	0.66225	13	0	3	0	0	0	0	0	4	211.268	4.9212	15	2	1	0	0	0	1	0	19	2	0	74.8543	29	0	0	0	0	0	0	3	0
Varenicline	ZINC000001481833	Benzazepines	?	581	-4.35	-6.72518	-6.7	4.35	6.72518	6.7	2.04014	1.4281	0.713	0.228	0.229	0.584	0.5275	13	0	3	0	0	0	0	0	4	211.268	4.9212	15	2	1	0	0	0	1	0	19	2	0	74.8543	29	0	0	0	0	0	0	3	0
Varenicline	ZINC000001481833	Benzazepines	?	582	-4.65	-5.70889	-5.7	4.65	5.70889	5.7	2.33191	1.62183	0.547	0.768	0.763	0.705	0.68	13	0	3	0	0	0	0	0	4	211.268	4.9212	15	2	1	0	0	0	1	0	19	2	0	74.8543	29	0	0	0	0	0	0	3	0
Etifelmine	ZINC000001482062	Benzene and substituted derivatives	Diphenylmethanes	583	-4.26	-6.15187	-6	4.26	6.15187	6	1.2716	0.16558	0.756	0.524	0.6	0.233	0.4555	12	5	0	1	0	0	0	0	2	237.346	7.6366	19	0	1	0	0	0	0	0.210526	19	0	0	99.3005	37	0	0	0	0	0	0	1	0
Etifelmine	ZINC000001482062	Benzene and substituted derivatives	Diphenylmethanes	584	-4.03	-6.11232	-6	4.03	6.11232	6	1.64495	0.870093	0.847	0.546	0.6	0.4	0.56175	12	5	0	1	0	0	0	0	2	237.346	7.6366	19	0	1	0	0	0	0	0.210526	19	0	0	99.3005	37	0	0	0	0	0	0	1	0
Etifelmine	ZINC000001482062	Benzene and substituted derivatives	Diphenylmethanes	585	-4.31	-6.2331	-6.1	4.31	6.2331	6.1	0.655497	0.143385	0.734	0.472	0.538	0.027	0.3315	12	5	0	1	0	0	0	0	2	237.346	7.6366	19	0	1	0	0	0	0	0.210526	19	0	0	99.3005	37	0	0	0	0	0	0	1	0
Nicofetamide	ZINC000014684145	Stilbenes	?	586	-6.05	-6.66053	-6.7	6.05	6.66053	6.7	2.47821	1.06069	0.04	0.254	0.229	0.76	0.44725	17	3	1	1	0	1	0	0	3	302.377	6.8534	21	3	1	1	0	0	0	0.24	25	1	0	109.946	41	0	0	0	0	0	0	2	1
Nicofetamide	ZINC000014684145	Stilbenes	?	587	-5.54	-7.01449	-6.9	5.54	7.01449	6.9	2.56244	0.809268	0.13	0.124	0.158	0.788	0.466	19	1	2	0	1	0	0	0	4	302.377	6.8534	21	3	1	1	0	0	0	0.24	25	1	0	109.946	41	0	0	0	0	0	0	2	1
Nicofetamide	ZINC000014684145	Stilbenes	?	588	-5.64	-7.19206	-7.2	5.64	7.19206	7.2	2.69208	1.21292	0.104	0.087	0.08	0.835	0.4635	17	3	1	1	0	1	0	0	3	302.377	6.8534	21	3	1	1	0	0	0	0.24	25	1	0	109.946	41	0	0	0	0	0	0	2	1
Irsogladine	ZINC000000002645	Benzene and substituted derivatives	Halobenzenes	589	-5.16	-6.43253	-6.1	5.16	6.43253	6.1	1.14429	0.432952	0.277	0.364	0.538	0.172	0.28975	9	0	3	2	0	0	0	0	2	256.096	4.398	12	5	2	0	0	0	0	0.0588235	17	1	0	71.1136	23	2	0	0	2	0	0	5	0
Irsogladine	ZINC000000002645	Benzene and substituted derivatives	Halobenzenes	590	-5.18	-6.40364	-5.7	5.18	6.40364	5.7	0.672896	0.302634	0.264	0.378	0.763	0.031	0.27225	9	0	3	2	0	0	0	0	2	256.096	4.398	12	5	2	0	0	0	0	0.0588235	17	1	0	71.1136	23	2	0	0	2	0	0	5	0
Irsogladine	ZINC000000002645	Benzene and substituted derivatives	Halobenzenes	591	-5.16	-6.21637	-5.5	5.16	6.21637	5.5	1.3684	0.628448	0.277	0.484	0.852	0.279	0.42175	9	0	3	2	0	0	0	0	2	256.096	4.398	12	5	2	0	0	0	0	0.0588235	17	1	0	71.1136	23	2	0	0	2	0	0	5	0
Flumexadol	ZINC000001571539	Oxazinanes	Morpholines	592	-3.97	-6.51827	-6.4	3.97	6.51827	6.4	2.37904	0.656845	0.868	0.316	0.362	0.723	0.669	10	1	1	0	1	0	0	0	2	231.217	5.6127	13	1	1	0	0	0	1	0.117647	17	1	0	63.9363	28	3	0	0	0	0	3	1	1
Flumexadol	ZINC000001571539	Oxazinanes	Morpholines	593	-4.26	-6.51042	-6.5	4.26	6.51042	6.5	2.04486	0.775674	0.756	0.321	0.313	0.586	0.56025	10	1	1	0	1	0	0	0	2	231.217	5.6127	13	1	1	0	0	0	1	0.117647	17	1	0	63.9363	28	3	0	0	0	0	3	1	1
Flumexadol	ZINC000001571539	Oxazinanes	Morpholines	594	-4.17	-6.40973	-6.4	4.17	6.40973	6.4	1.47615	1.03556	0.794	0.374	0.362	0.332	0.455	10	1	1	0	1	0	0	0	2	231.217	5.6127	13	1	1	0	0	0	1	0.117647	17	1	0	63.9363	28	3	0	0	0	0	3	1	1
Naftypramide	ZINC000001846033	Naphthalenes	?	595	-3.5	-5.09781	-5	3.5	5.09781	5	2.27246	1.4068	0.967	0.952	0.963	0.685	0.825	10	9	0	2	0	1	0	0	2	298.43	8.9331	28	2	2	1	0	0	1	0.26087	23	0	0	121.608	48	0	0	0	0	0	0	2	1
Vedaprofen	ZINC000001842638	Naphthalenes	?	596	-4.2	-7.45969	-7.4	4.2	7.45969	7.4	1.92278	0.898466	0.781	0.039	0.045	0.531	0.472	16	3	0	0	0	2	0	0	3	281.375	8.5718	22	2	0	1	1	0	0	0.130435	23	0	0	107.441	42	0	0	0	0	0	0	0	2
Vedaprofen	ZINC000001842638	Naphthalenes	?	597	-4.52	-5.82197	-6.5	4.52	5.82197	6.5	1.34746	0.927824	0.625	0.715	0.313	0.269	0.369	16	3	0	0	0	2	0	0	3	281.375	8.5718	22	2	0	1	1	0	0	0.130435	23	0	0	107.441	42	0	0	0	0	0	0	0	2
Vedaprofen	ZINC000001842638	Naphthalenes	?	598	-3.68	-6.59098	-7	3.68	6.59098	7	2.29735	0.612116	0.938	0.282	0.129	0.692	0.61275	16	3	0	0	0	2	0	0	3	281.375	8.5718	22	2	0	1	1	0	0	0.130435	23	0	0	107.441	42	0	0	0	0	0	0	0	2
Adrafinil	ZINC000004611316	Benzene and substituted derivatives	Diphenylmethanes	599	-5.97	-6.49831	-6.3	5.97	6.49831	6.3	2.5615	1.67845	0.052	0.327	0.421	0.787	0.51175	12	3	0	1	0	3	0	1	2	289.356	5.8279	18	4	2	2	1	0	0	0.285714	21	0	0	93.1841	35	0	0	0	0	0	0	1	3
Adrafinil	ZINC000004611316	Benzene and substituted derivatives	Diphenylmethanes	600	-5.02	-5.84845	-5.7	5.02	5.84845	5.7	2.69071	1.85906	0.346	0.7	0.763	0.835	0.69475	12	3	0	1	0	3	0	1	2	289.356	5.8279	18	4	2	2	1	0	0	0.285714	21	0	0	93.1841	35	0	0	0	0	0	0	1	3
Adrafinil	ZINC000004611316	Benzene and substituted derivatives	Diphenylmethanes	601	-5.72	-6.42238	-6.5	5.72	6.42238	6.5	2.89285	1.78504	0.088	0.368	0.313	0.903	0.55175	12	3	0	1	0	3	0	1	2	289.356	5.8279	18	4	2	2	1	0	0	0.285714	21	0	0	93.1841	35	0	0	0	0	0	0	1	3
Furaprofen	ZINC000000000331	Benzofurans	Phenylbenzofurans	602	-4.21	-6.45274	-6	4.21	6.45274	6	1.68506	0.139551	0.777	0.351	0.6	0.421	0.55475	14	3	0	0	1	2	0	0	3	265.288	6.3511	14	3	0	1	1	0	0	0.136364	22	1	0	89.8005	33	0	0	0	0	0	0	0	3
Furaprofen	ZINC000000000331	Benzofurans	Phenylbenzofurans	603	-3.96	-7.10074	-7.1	3.96	7.10074	7.1	1.07187	0.207979	0.871	0.103	0.101	0.138	0.312	14	3	0	0	1	2	0	0	3	265.288	6.3511	14	3	0	1	1	0	0	0.136364	22	1	0	89.8005	33	0	0	0	0	0	0	0	3
Furaprofen	ZINC000000000331	Benzofurans	Phenylbenzofurans	604	-4.05	-6.78707	-6.9	4.05	6.78707	6.9	1.00045	0.64058	0.839	0.205	0.158	0.107	0.30275	14	3	0	0	1	2	0	0	3	265.288	6.3511	14	3	0	1	1	0	0	0.136364	22	1	0	89.8005	33	0	0	0	0	0	0	0	3
Trihexyphenidyl	ZINC000000968274	Organonitrogen compounds	Amines	605	-5.06	-6.82166	-6.7	5.06	6.82166	6.7	2.56254	1.55855	0.326	0.191	0.229	0.788	0.53275	17	3	1	0	0	1	0	0	3	301.474	9.7967	32	1	2	2	0	1	1	0.208333	24	1	0	125.46	53	0	0	0	0	0	0	1	1
Trihexyphenidyl	ZINC000000968274	Organonitrogen compounds	Amines	606	-4.94	-7.07022	-6.9	4.94	7.07022	6.9	2.57336	1.58975	0.39	0.112	0.158	0.793	0.5335	17	3	1	0	0	1	0	0	3	301.474	9.7967	32	1	2	2	0	1	1	0.208333	24	1	0	125.46	53	0	0	0	0	0	0	1	1
Trihexyphenidyl	ZINC000000968274	Organonitrogen compounds	Amines	607	-5.18	-6.80583	-6.7	5.18	6.80583	6.7	2.62479	1.61741	0.264	0.197	0.229	0.814	0.53025	17	3	1	0	0	1	0	0	3	301.474	9.7967	32	1	2	2	0	1	1	0.208333	24	1	0	125.46	53	0	0	0	0	0	0	1	1
Trimexiline	ZINC000033827808	Benzene and substituted derivatives	Phenylmethylamines	608	-4.49	-5.88795	-5.9	4.49	5.88795	5.9	1.15747	0.651863	0.638	0.678	0.662	0.177	0.4135	6	11	0	1	0	0	0	0	1	247.426	10.2207	29	0	1	0	0	0	1	0.388889	18	0	0	114.573	47	0	0	0	0	0	0	1	0
Trimexiline	ZINC000033827808	Benzene and substituted derivatives	Phenylmethylamines	609	-4.69	-5.92899	-6.1	4.69	5.92899	6.1	1.02942	0.626254	0.528	0.652	0.538	0.119	0.326	6	11	0	1	0	0	0	0	1	247.426	10.2207	29	0	1	0	0	0	1	0.388889	18	0	0	114.573	47	0	0	0	0	0	0	1	0
Trimexiline	ZINC000033827808	Benzene and substituted derivatives	Phenylmethylamines	610	-4.72	-5.93475	-6	4.72	5.93475	6	1.09154	0.648832	0.511	0.647	0.6	0.147	0.35125	6	11	0	1	0	0	0	0	1	247.426	10.2207	29	0	1	0	0	0	1	0.388889	18	0	0	114.573	47	0	0	0	0	0	0	1	0
Fenocinol	ZINC000000000299	Benzene and substituted derivatives	Diphenylmethanes	611	-4.44	-5.59027	-5.5	4.44	5.59027	5.5	2.76555	1.67454	0.664	0.825	0.852	0.865	0.8115	12	4	0	0	0	3	0	0	2	258.317	5.6902	21	3	1	1	0	1	0	0.2	20	0	0	94.0948	37	0	0	0	0	0	0	0	3
Fenocinol	ZINC000000000299	Benzene and substituted derivatives	Diphenylmethanes	612	-3.41	-6.57361	-6.4	3.41	6.57361	6.4	1.69753	1.10898	0.976	0.29	0.362	0.426	0.5475	12	4	0	0	0	3	0	0	2	258.317	5.6902	21	3	1	1	0	1	0	0.2	20	0	0	94.0948	37	0	0	0	0	0	0	0	3
Fenocinol	ZINC000000000299	Benzene and substituted derivatives	Diphenylmethanes	613	-4.11	-6.23568	-6.1	4.11	6.23568	6.1	2.56816	1.60724	0.821	0.469	0.538	0.792	0.73575	12	4	0	0	0	3	0	0	2	258.317	5.6902	21	3	1	1	0	1	0	0.2	20	0	0	94.0948	37	0	0	0	0	0	0	0	3
Mabuterol	ZINC000001846294	Benzene and substituted derivatives	Trifluoromethylbenzenes	614	-4.99	-6.75138	-6.4	4.99	6.75138	6.4	2.8725	1.37581	0.364	0.217	0.362	0.898	0.6305	6	7	0	2	0	1	0	0	1	310.747	7.1574	20	2	3	1	0	1	1	0.25	20	0	0	94.1997	38	4	0	0	1	0	3	2	1
Mabuterol	ZINC000001846294	Benzene and substituted derivatives	Trifluoromethylbenzenes	615	-5.18	-6.60778	-6.3	5.18	6.60778	6.3	2.68677	1.71267	0.264	0.274	0.421	0.833	0.58775	6	7	0	2	0	1	0	0	1	310.747	7.1574	20	2	3	1	0	1	1	0.25	20	0	0	94.1997	38	4	0	0	1	0	3	2	1
Mabuterol	ZINC000001846294	Benzene and substituted derivatives	Trifluoromethylbenzenes	616	-5.44	-6.19329	-6	5.44	6.19329	6	3.0078	1.45	0.162	0.497	0.6	0.934	0.6575	6	7	0	2	0	1	0	0	1	310.747	7.1574	20	2	3	1	0	1	1	0.25	20	0	0	94.1997	38	4	0	0	1	0	3	2	1
Piperocaine	ZINC000002034888	Benzene and substituted derivatives	Benzoic acids and derivatives	617	-5.06	-6.75284	-6.7	5.06	6.75284	6.7	0.97856	0.609609	0.326	0.216	0.229	0.1	0.18875	11	5	1	0	0	2	0	0	2	261.365	7.9031	25	2	1	1	0	0	1	0.3	20	1	0	100.013	42	0	0	0	0	0	0	1	2
Piperocaine	ZINC000002034888	Benzene and substituted derivatives	Benzoic acids and derivatives	618	-4.93	-6.66839	-6.5	4.93	6.66839	6.5	0.993266	0.630952	0.395	0.25	0.313	0.104	0.229	11	5	1	0	0	2	0	0	2	261.365	7.9031	25	2	1	1	0	0	1	0.3	20	1	0	100.013	42	0	0	0	0	0	0	1	2
Piperocaine	ZINC000002034888	Benzene and substituted derivatives	Benzoic acids and derivatives	619	-5.09	-6.7329	-6.7	5.09	6.7329	6.7	0.81216	0.538716	0.31	0.226	0.229	0.056	0.16275	11	5	1	0	0	2	0	0	2	261.365	7.9031	25	2	1	1	0	0	1	0.3	20	1	0	100.013	42	0	0	0	0	0	0	1	2
Oxaflozane	ZINC000030691499	Oxazinanes	Morpholines	620	-5.03	-6.83878	-6.8	5.03	6.83878	6.8	0.770137	0.510683	0.342	0.182	0.194	0.045	0.1565	10	4	1	0	1	0	0	0	2	273.298	7.5507	19	1	1	1	0	0	1	0.15	20	1	0	84.8879	37	3	0	0	0	0	3	1	1
Oxaflozane	ZINC000030691499	Oxazinanes	Morpholines	621	-4.81	-6.20559	-6.2	4.81	6.20559	6.2	0.842666	0.559002	0.461	0.492	0.474	0.063	0.26525	10	4	1	0	1	0	0	0	2	273.298	7.5507	19	1	1	1	0	0	1	0.15	20	1	0	84.8879	37	3	0	0	0	0	3	1	1
Oxaflozane	ZINC000030691499	Oxazinanes	Morpholines	622	-4.75	-6.19648	-6.2	4.75	6.19648	6.2	1.20436	0.827615	0.495	0.495	0.474	0.201	0.34275	10	4	1	0	1	0	0	0	2	273.298	7.5507	19	1	1	1	0	0	1	0.15	20	1	0	84.8879	37	3	0	0	0	0	3	1	1
Cloperastine	ZINC000000057251	Benzene and substituted derivatives	Diphenylmethanes	623	-5.23	-6.73935	-6.8	5.23	6.73935	6.8	2.62464	1.80002	0.239	0.223	0.194	0.814	0.51525	17	3	1	0	0	1	0	0	3	329.871	9.8026	25	1	1	1	0	0	1	0.24	25	1	0	120.532	47	1	0	0	1	0	0	1	1
Cloperastine	ZINC000000057251	Benzene and substituted derivatives	Diphenylmethanes	624	-5.8	-6.97436	-6.9	5.8	6.97436	6.9	2.58178	0.845787	0.073	0.14	0.158	0.797	0.45625	17	3	1	0	0	1	0	0	3	329.871	9.8026	25	1	1	1	0	0	1	0.24	25	1	0	120.532	47	1	0	0	1	0	0	1	1
Isbogrel	ZINC000013437583	Benzene and substituted derivatives	Styrenes	625	-4.64	-6.55523	-6.4	4.64	6.55523	6.4	1.2307	0.604182	0.551	0.298	0.362	0.214	0.33525	11	7	1	0	0	2	0	0	2	280.347	6.9531	20	3	0	1	1	0	0	0.318182	22	1	0	101.705	39	0	0	0	0	0	0	1	2
Isbogrel	ZINC000013437583	Benzene and substituted derivatives	Styrenes	626	-4.73	-6.35982	-6.4	4.73	6.35982	6.4	1.12484	0.18081	0.505	0.404	0.362	0.162	0.29775	11	7	1	0	0	2	0	0	2	280.347	6.9531	20	3	0	1	1	0	0	0.318182	22	1	0	101.705	39	0	0	0	0	0	0	1	2
Isbogrel	ZINC000013437583	Benzene and substituted derivatives	Styrenes	627	-4.66	-6.50455	-6.4	4.66	6.50455	6.4	2.05517	1.22381	0.543	0.324	0.362	0.591	0.52175	11	7	1	0	0	2	0	0	2	280.347	6.9531	20	3	0	1	1	0	0	0.318182	22	1	0	101.705	39	0	0	0	0	0	0	1	2
Guanoxan	ZINC000000000357	Benzodioxanes	Benzo-1,4-dioxanes	628	-5.76	-6.0647	-5.9	5.76	6.0647	5.9	1.82011	0.125944	0.081	0.573	0.662	0.478	0.42475	8	2	0	3	2	0	0	0	2	207.233	4.7207	18	5	3	2	0	0	2	0.1875	16	1	0	69.3896	28	0	0	0	0	0	0	3	2
Guanoxan	ZINC000000000357	Benzodioxanes	Benzo-1,4-dioxanes	629	-5.81	-6.07376	-5.9	5.81	6.07376	5.9	1.9	0.165921	0.071	0.569	0.662	0.521	0.44375	8	2	0	3	2	0	0	0	2	207.233	4.7207	18	5	3	2	0	0	2	0.1875	16	1	0	69.3896	28	0	0	0	0	0	0	3	2
Guanoxan	ZINC000000000357	Benzodioxanes	Benzo-1,4-dioxanes	630	-5.13	-6.26	-6.1	5.13	6.26	6.1	1.29993	0.8957	0.29	0.458	0.538	0.246	0.33	8	2	0	3	2	0	0	0	2	207.233	4.7207	18	5	3	2	0	0	2	0.1875	16	1	0	69.3896	28	0	0	0	0	0	0	3	2
Diflunisal	ZINC000000020243	Benzene and substituted derivatives	Biphenyls and derivatives	631	-4.07	-7.84384	-7.6	4.07	7.84384	7.6	0.608359	0.16458	0.832	0.011	0.024	0.022	0.225	12	1	0	0	0	3	0	0	2	249.192	3.6737	9	3	1	2	1	0	0	0.105263	19	0	0	66.571	25	2	0	0	0	0	2	0	3
Diflunisal	ZINC000000020243	Benzene and substituted derivatives	Biphenyls and derivatives	632	-4.15	-7.84255	-7.6	4.15	7.84255	7.6	1.19769	0.57644	0.803	0.011	0.024	0.198	0.30575	12	1	0	0	0	3	0	0	2	249.192	3.6737	9	3	1	2	1	0	0	0.105263	19	0	0	66.571	25	2	0	0	0	0	2	0	3
Diflunisal	ZINC000000020243	Benzene and substituted derivatives	Biphenyls and derivatives	633	-4.6	-7.84154	-7.6	4.6	7.84154	7.6	3.15486	2.11632	0.575	0.011	0.024	0.963	0.63125	12	1	0	0	0	3	0	0	2	249.192	3.6737	9	3	1	2	1	0	0	0.105263	19	0	0	66.571	25	2	0	0	0	0	2	0	3
Alfatradiol	ZINC000003881870	Steroids and steroid derivatives	Estrane steroids	634	-4.13	-7.37602	-7.1	4.13	7.37602	7.1	0.673891	0.310916	0.812	0.055	0.101	0.031	0.24375	17	1	0	0	0	2	0	0	4	272.388	7.2852	26	2	2	2	0	1	0	0	23	0	0	107.071	44	0	0	0	0	0	0	0	2
Dichlorophen	ZINC000000056435	Benzene and substituted derivatives	Diphenylmethanes	635	-5.01	-6.35088	-6	5.01	6.35088	6	1.36092	0.752345	0.352	0.407	0.6	0.276	0.376	12	1	0	0	0	2	0	0	2	269.127	4.45	12	2	2	2	0	0	0	0.111111	18	0	0	81.207	27	2	0	0	2	0	0	0	2
Dichlorophen	ZINC000000056435	Benzene and substituted derivatives	Diphenylmethanes	636	-5	-6.44322	-6.1	5	6.44322	6.1	1.66096	0.90489	0.359	0.357	0.538	0.408	0.42825	12	1	0	0	0	2	0	0	2	269.127	4.45	12	2	2	2	0	0	0	0.111111	18	0	0	81.207	27	2	0	0	2	0	0	0	2
Dichlorophen	ZINC000000056435	Benzene and substituted derivatives	Diphenylmethanes	637	-4.94	-6.44147	-6.1	4.94	6.44147	6.1	0.409384	0.142248	0.39	0.358	0.538	0.006	0.235	12	1	0	0	0	2	0	0	2	269.127	4.45	12	2	2	2	0	0	0	0.111111	18	0	0	81.207	27	2	0	0	2	0	0	0	2
Butidrine	ZINC000004212253	Tetralins	?	638	-5.18	-7.03336	-7	5.18	7.03336	7	1.63421	0.878307	0.264	0.12	0.129	0.397	0.29675	10	6	0	1	0	1	0	0	2	247.382	7.9733	26	1	2	1	0	1	1	0.263158	19	0	0	104.765	43	0	0	0	0	0	0	1	1
Butidrine	ZINC000004212253	Tetralins	?	639	-4.93	-7.15729	-6.9	4.93	7.15729	6.9	1.75223	1.18721	0.395	0.092	0.158	0.451	0.36375	10	6	0	1	0	1	0	0	2	247.382	7.9733	26	1	2	1	0	1	1	0.263158	19	0	0	104.765	43	0	0	0	0	0	0	1	1
Butidrine	ZINC000004212253	Tetralins	?	640	-5.05	-7.0465	-6.9	5.05	7.0465	6.9	1.70504	1.06083	0.33	0.116	0.158	0.43	0.337	10	6	0	1	0	1	0	0	2	247.382	7.9733	26	1	2	1	0	1	1	0.263158	19	0	0	104.765	43	0	0	0	0	0	0	1	1
Amylmetacresol	ZINC000002039651	Phenols	Cresols	641	-3.61	-5.64872	-5.6	3.61	5.64872	5.6	1.92589	1.05222	0.951	0.798	0.81	0.532	0.70625	6	6	0	0	0	1	0	0	1	178.275	5.8059	19	1	1	1	0	0	0	0.307692	13	0	0	76.989	31	0	0	0	0	0	0	0	1
Amylmetacresol	ZINC000002039651	Phenols	Cresols	642	-3.48	-5.80263	-5.6	3.48	5.80263	5.6	1.82034	1.04662	0.97	0.724	0.81	0.479	0.6845	6	6	0	0	0	1	0	0	1	178.275	5.8059	19	1	1	1	0	0	0	0.307692	13	0	0	76.989	31	0	0	0	0	0	0	0	1
Amylmetacresol	ZINC000002039651	Phenols	Cresols	643	-3.7	-5.62926	-5.4	3.7	5.62926	5.4	2.19283	0.912529	0.934	0.808	0.888	0.655	0.783	6	6	0	0	0	1	0	0	1	178.275	5.8059	19	1	1	1	0	0	0	0.307692	13	0	0	76.989	31	0	0	0	0	0	0	0	1
Penbutolol	ZINC000000001898	Phenol ethers	?	644	-5.8	-6.26794	-6.1	5.8	6.26794	6.1	1.52721	0.901255	0.073	0.452	0.538	0.352	0.32875	11	7	0	1	0	2	0	0	2	291.435	8.9773	31	2	2	1	0	1	1	0.318182	22	0	0	120.012	50	0	0	0	0	0	0	1	2
Penbutolol	ZINC000000001898	Phenol ethers	?	645	-4.92	-6.18612	-6.1	4.92	6.18612	6.1	1.62868	0.984756	0.403	0.502	0.538	0.395	0.43275	11	7	0	1	0	2	0	0	2	291.435	8.9773	31	2	2	1	0	1	1	0.318182	22	0	0	120.012	50	0	0	0	0	0	0	1	2
Tolperisone	ZINC000000057519	Organooxygen compounds	Carbonyl compounds	646	-4.49	-6.65593	-6.6	4.49	6.65593	6.6	0.793673	0.540099	0.638	0.256	0.268	0.049	0.251	11	5	1	0	0	1	0	0	2	245.366	7.9494	24	1	1	1	0	0	1	0.210526	19	1	0	99.0874	41	0	0	0	0	0	0	1	1
Tolperisone	ZINC000000057519	Organooxygen compounds	Carbonyl compounds	647	-5.21	-6.87893	-6.9	5.21	6.87893	6.9	1.17446	0.795055	0.249	0.17	0.158	0.188	0.19575	11	5	1	0	0	1	0	0	2	245.366	7.9494	24	1	1	1	0	0	1	0.210526	19	1	0	99.0874	41	0	0	0	0	0	0	1	1
Tolperisone	ZINC000000057519	Organooxygen compounds	Carbonyl compounds	648	-4.94	-6.64985	-6.7	4.94	6.64985	6.7	0.556228	0.340466	0.39	0.26	0.229	0.017	0.16325	11	5	1	0	0	1	0	0	2	245.366	7.9494	24	1	1	1	0	0	1	0.210526	19	1	0	99.0874	41	0	0	0	0	0	0	1	1
Pentafluranol	ZINC000000000592	Stilbenes	?	649	-5.08	-7.78767	-7.4	5.08	7.78767	7.4	3.15587	1.61846	0.315	0.015	0.045	0.964	0.572	12	5	0	0	0	2	0	0	2	346.295	6.3513	17	2	2	2	0	0	0	0.2	25	0	0	95.807	39	5	0	0	0	0	5	0	2
Pentafluranol	ZINC000000000592	Stilbenes	?	650	-3.77	-7.43085	-6.9	3.77	7.43085	6.9	3.10028	1.58889	0.919	0.042	0.158	0.954	0.74625	15	2	0	0	0	2	0	0	3	346.295	6.3513	17	2	2	2	0	0	0	0.2	25	0	0	95.807	39	5	0	0	0	0	5	0	2
Pentafluranol	ZINC000000000592	Stilbenes	?	651	-4.89	-7.82993	-7.4	4.89	7.82993	7.4	3.02855	1.92474	0.418	0.012	0.045	0.939	0.58525	12	5	0	0	0	2	0	0	2	346.295	6.3513	17	2	2	2	0	0	0	0.2	25	0	0	95.807	39	5	0	0	0	0	5	0	2
Indalpine	ZINC000004674528	Indoles and derivatives	Indoles	652	-5.2	-7.06812	-7.1	5.2	7.06812	7.1	1.21074	0.835408	0.252	0.112	0.101	0.204	0.19025	13	2	2	0	0	0	0	0	3	228.339	7.6012	20	0	2	1	0	0	1	0.157895	19	2	0	92.4887	37	0	0	0	0	0	0	2	0
Indalpine	ZINC000004674528	Indoles and derivatives	Indoles	653	-5.34	-7.06557	-7.1	5.34	7.06557	7.1	1.0355	0.693968	0.195	0.113	0.101	0.122	0.135	13	2	2	0	0	0	0	0	3	228.339	7.6012	20	0	2	1	0	0	1	0.157895	19	2	0	92.4887	37	0	0	0	0	0	0	2	0
Indalpine	ZINC000004674528	Indoles and derivatives	Indoles	654	-5.33	-7.22523	-7.3	5.33	7.22523	7.3	1.4278	0.906072	0.2	0.079	0.061	0.309	0.21975	13	2	2	0	0	0	0	0	3	228.339	7.6012	20	0	2	1	0	0	1	0.157895	19	2	0	92.4887	37	0	0	0	0	0	0	2	0
Berlafenone	ZINC000002019970	Benzene and substituted derivatives	Biphenyls and derivatives	655	-5.46	-6.84863	-6.7	5.46	6.84863	6.7	2.25966	0.977785	0.156	0.178	0.229	0.682	0.43725	12	7	0	1	0	2	0	0	2	299.414	8.1164	27	2	2	1	0	1	1	0.304348	23	0	0	119.14	47	0	0	0	0	0	0	1	2
Berlafenone	ZINC000002019970	Benzene and substituted derivatives	Biphenyls and derivatives	656	-5.69	-6.64962	-6.5	5.69	6.64962	6.5	2.09104	0.729944	0.094	0.26	0.313	0.61	0.40675	12	7	0	1	0	2	0	0	2	299.414	8.1164	27	2	2	1	0	1	1	0.304348	23	0	0	119.14	47	0	0	0	0	0	0	1	2
Berlafenone	ZINC000002019970	Benzene and substituted derivatives	Biphenyls and derivatives	657	-5.2	-6.68159	-6.5	5.2	6.68159	6.5	2.23658	0.968633	0.252	0.245	0.313	0.671	0.47675	12	7	0	1	0	2	0	0	2	299.414	8.1164	27	2	2	1	0	1	1	0.304348	23	0	0	119.14	47	0	0	0	0	0	0	1	2
Cinnamedrine	ZINC000000000151	Benzene and substituted derivatives	Phenylpropanes	658	-5.21	-6.84693	-6.7	5.21	6.84693	6.7	1.83484	1.0441	0.249	0.179	0.229	0.486	0.3625	12	7	0	1	0	1	0	0	2	281.399	7.6147	24	1	2	2	0	1	1	0.272727	22	0	0	115.019	44	0	0	0	0	0	0	1	1
Cinnamedrine	ZINC000000000151	Benzene and substituted derivatives	Phenylpropanes	659	-4.43	-6.83545	-6.7	4.43	6.83545	6.7	1.95462	0.400849	0.669	0.183	0.229	0.543	0.496	12	7	0	1	0	1	0	0	2	281.399	7.6147	24	1	2	2	0	1	1	0.272727	22	0	0	115.019	44	0	0	0	0	0	0	1	1
Cinnamedrine	ZINC000000000151	Benzene and substituted derivatives	Phenylpropanes	660	-4.87	-7.46434	-7.3	4.87	7.46434	7.3	1.67673	1.04207	0.429	0.038	0.061	0.417	0.331	12	7	0	1	0	1	0	0	2	281.399	7.6147	24	1	2	2	0	1	1	0.272727	22	0	0	115.019	44	0	0	0	0	0	0	1	1
Benzphetamine	ZINC000000968306	Benzene and substituted derivatives	Phenethylamines	661	-4.11	-6.35893	-6.3	4.11	6.35893	6.3	1.02268	0.661412	0.821	0.404	0.421	0.117	0.369	12	5	0	1	0	0	0	0	2	239.362	7.7743	21	0	1	1	0	0	1	0.263158	19	0	0	101.474	39	0	0	0	0	0	0	1	0
Benzphetamine	ZINC000000968306	Benzene and substituted derivatives	Phenethylamines	662	-3.98	-7.10249	-6.8	3.98	7.10249	6.8	0.798507	0.553161	0.865	0.103	0.194	0.05	0.28975	12	5	0	1	0	0	0	0	2	239.362	7.7743	21	0	1	1	0	0	1	0.263158	19	0	0	101.474	39	0	0	0	0	0	0	1	0
Benzphetamine	ZINC000000968306	Benzene and substituted derivatives	Phenethylamines	663	-4.51	-6.64935	-6.6	4.51	6.64935	6.6	1.08552	0.231687	0.628	0.261	0.268	0.145	0.2965	12	5	0	1	0	0	0	0	2	239.362	7.7743	21	0	1	1	0	0	1	0.263158	19	0	0	101.474	39	0	0	0	0	0	0	1	0
Ciclafrine	ZINC000004626626	Azaspirodecane derivatives	?	664	-5.31	-7.98323	-7.8	5.31	7.98323	7.8	1.46942	0.843232	0.204	0.007	0.012	0.33	0.219	15	0	1	0	1	1	0	0	3	247.338	6.5237	23	2	2	1	0	0	1	0.05	20	1	0	92.7673	39	0	0	0	0	0	0	1	2
Ciclafrine	ZINC000004626626	Azaspirodecane derivatives	?	665	-5.03	-7.98839	-7.8	5.03	7.98839	7.8	1.29164	0.683027	0.342	0.006	0.012	0.243	0.21	15	0	1	0	1	1	0	0	3	247.338	6.5237	23	2	2	1	0	0	1	0.05	20	1	0	92.7673	39	0	0	0	0	0	0	1	2
Ciclafrine	ZINC000004626626	Azaspirodecane derivatives	?	666	-5.41	-8.00007	-7.6	5.41	8.00007	7.6	1.35716	0.684755	0.173	0.006	0.024	0.274	0.18625	15	0	1	0	1	1	0	0	3	247.338	6.5237	23	2	2	1	0	0	1	0.05	20	1	0	92.7673	39	0	0	0	0	0	0	1	2
Afalanine	ZINC000000135391	Carboxylic acids and derivatives	Amino acids, peptides, and analogues	667	-4.55	-5.67423	-5.7	4.55	5.67423	5.7	2.46877	0.7483	0.608	0.782	0.763	0.757	0.72125	0	3	0	1	0	2	0	0	1	206.221	3.8315	15	4	1	2	1	0	0	0.333333	15	0	0	66.0569	27	0	0	0	0	0	0	1	3
Afalanine	ZINC000000135391	Carboxylic acids and derivatives	Amino acids, peptides, and analogues	668	-4.16	-5.56591	-5.6	4.16	5.56591	5.6	2.355	1.66133	0.798	0.833	0.81	0.714	0.759	0	3	0	1	0	2	0	0	1	206.221	3.8315	15	4	1	2	1	0	0	0.333333	15	0	0	66.0569	27	0	0	0	0	0	0	1	3
Afalanine	ZINC000000135391	Carboxylic acids and derivatives	Amino acids, peptides, and analogues	669	-4.25	-5.71771	-5.7	4.25	5.71771	5.7	2.51729	0.782463	0.761	0.765	0.763	0.773	0.7675	0	3	0	1	0	2	0	0	1	206.221	3.8315	15	4	1	2	1	0	0	0.333333	15	0	0	66.0569	27	0	0	0	0	0	0	1	3
Tefazoline	ZINC000000002128	Tetralins	?	670	-4.33	-5.81887	-5.9	4.33	5.81887	5.9	1.15998	0.697117	0.724	0.718	0.662	0.178	0.4355	13	1	2	0	0	0	0	0	3	214.312	5.9564	20	2	1	1	0	0	1	0.111111	18	1	0	81.5368	34	0	0	0	0	0	0	2	0
Tefazoline	ZINC000000002128	Tetralins	?	671	-4.4	-5.82199	-5.8	4.4	5.82199	5.8	1.69704	1.16694	0.688	0.715	0.715	0.426	0.56375	13	1	2	0	0	0	0	0	3	214.312	5.9564	20	2	1	1	0	0	1	0.111111	18	1	0	81.5368	34	0	0	0	0	0	0	2	0
Tefazoline	ZINC000000002128	Tetralins	?	672	-4.73	-5.95222	-6	4.73	5.95222	6	1.41047	0.95884	0.505	0.637	0.6	0.301	0.42675	13	1	2	0	0	0	0	0	3	214.312	5.9564	20	2	1	1	0	0	1	0.111111	18	1	0	81.5368	34	0	0	0	0	0	0	2	0
Gemfibrozil	ZINC000001530641	Phenol ethers	?	673	-4.57	-6.50145	-6.5	4.57	6.50145	6.5	1.6521	0.670059	0.595	0.325	0.313	0.403	0.4285	6	9	0	0	0	3	0	0	1	249.33	7.4159	23	3	0	1	1	0	0	0.333333	18	0	0	93.4745	39	0	0	0	0	0	0	0	3
Gemfibrozil	ZINC000001530641	Phenol ethers	?	674	-4.11	-6.49736	-6.5	4.11	6.49736	6.5	1.21885	0.715028	0.821	0.328	0.313	0.208	0.3875	6	9	0	0	0	3	0	0	1	249.33	7.4159	23	3	0	1	1	0	0	0.333333	18	0	0	93.4745	39	0	0	0	0	0	0	0	3
Gemfibrozil	ZINC000001530641	Phenol ethers	?	675	-4.53	-6.49745	-6.5	4.53	6.49745	6.5	1.59545	1.06465	0.62	0.327	0.313	0.381	0.42375	6	9	0	0	0	3	0	0	1	249.33	7.4159	23	3	0	1	1	0	0	0.333333	18	0	0	93.4745	39	0	0	0	0	0	0	0	3
Hexacyprone	ZINC000001846045	Fatty Acyls	Fatty acids and conjugates	676	-3.08	-5.18938	-5.2	3.08	5.18938	5.2	2.21796	0.652443	0.995	0.938	0.933	0.663	0.8135	12	4	0	0	0	3	0	0	2	259.325	6.549	21	3	0	1	1	0	0	0.25	20	0	0	92.4095	38	0	0	0	0	0	0	0	3
Hexacyprone	ZINC000001846045	Fatty Acyls	Fatty acids and conjugates	677	-3.59	-5.05037	-5.1	3.59	5.05037	5.1	1.38131	0.49301	0.954	0.959	0.952	0.286	0.6195	12	4	0	0	0	3	0	0	2	259.325	6.549	21	3	0	1	1	0	0	0.25	20	0	0	92.4095	38	0	0	0	0	0	0	0	3
Hexacyprone	ZINC000001846045	Fatty Acyls	Fatty acids and conjugates	678	-3.05	-4.75947	-4.7	3.05	4.75947	4.7	2.99656	1.34479	0.996	0.982	0.985	0.931	0.96075	12	4	0	0	0	3	0	0	2	259.325	6.549	21	3	0	1	1	0	0	0.25	20	0	0	92.4095	38	0	0	0	0	0	0	0	3
Amfepentorex	ZINC000001842983	Benzene and substituted derivatives	Phenethylamines	679	-4.17	-5.77742	-5.7	4.17	5.77742	5.7	1.37115	0.216196	0.794	0.735	0.763	0.281	0.52975	6	9	0	1	0	0	0	0	1	219.372	8.8513	25	0	1	0	0	0	1	0.4375	16	0	0	100.413	41	0	0	0	0	0	0	1	0
Amfepentorex	ZINC000001842983	Benzene and substituted derivatives	Phenethylamines	680	-4.49	-6.05709	-6.1	4.49	6.05709	6.1	2.19545	1.48309	0.638	0.579	0.538	0.656	0.622	6	9	0	1	0	0	0	0	1	219.372	8.8513	25	0	1	0	0	0	1	0.4375	16	0	0	100.413	41	0	0	0	0	0	0	1	0
Amfepentorex	ZINC000001842983	Benzene and substituted derivatives	Phenethylamines	681	-4.8	-6.26299	-6.2	4.8	6.26299	6.2	1.22526	0.586782	0.47	0.455	0.474	0.21	0.341	6	9	0	1	0	0	0	0	1	219.372	8.8513	25	0	1	0	0	0	1	0.4375	16	0	0	100.413	41	0	0	0	0	0	0	1	0
Loxoprofen	ZINC000001846128	Phenylpropanoic acids	?	682	-4.05	-6.63061	-6.7	4.05	6.63061	6.7	2.19269	1.05192	0.839	0.266	0.229	0.655	0.5945	11	4	0	0	0	3	0	0	2	245.298	6.0349	19	3	0	1	1	0	0	0.210526	19	0	0	85.9075	35	0	0	0	0	0	0	0	3
Loxoprofen	ZINC000001846128	Phenylpropanoic acids	?	683	-4.28	-6.64975	-6.6	4.28	6.64975	6.6	2.26005	0.804591	0.746	0.26	0.268	0.682	0.5945	11	4	0	0	0	3	0	0	2	245.298	6.0349	19	3	0	1	1	0	0	0.210526	19	0	0	85.9075	35	0	0	0	0	0	0	0	3
Loxoprofen	ZINC000001846128	Phenylpropanoic acids	?	684	-4.42	-6.33586	-6.3	4.42	6.33586	6.3	2.24945	1.0921	0.677	0.416	0.421	0.676	0.6125	11	4	0	0	0	3	0	0	2	245.298	6.0349	19	3	0	1	1	0	0	0.210526	19	0	0	85.9075	35	0	0	0	0	0	0	0	3
Cyclizine	ZINC000019156872	Benzene and substituted derivatives	Diphenylmethanes	685	-4.33	-6.48701	-6.5	4.33	6.48701	6.5	0.570835	0.400873	0.724	0.334	0.313	0.019	0.26875	16	2	2	0	0	0	0	0	3	266.388	7.7922	22	0	2	2	0	0	2	0.136364	22	1	0	104.348	42	0	0	0	0	0	0	2	0
Cyclizine	ZINC000019156872	Benzene and substituted derivatives	Diphenylmethanes	686	-4.16	-5.82443	-5.8	4.16	5.82443	5.8	1.30044	0.905619	0.798	0.713	0.715	0.246	0.50125	16	2	2	0	0	0	0	0	3	266.388	7.7922	22	0	2	2	0	0	2	0.136364	22	1	0	104.348	42	0	0	0	0	0	0	2	0
Cyclizine	ZINC000019156872	Benzene and substituted derivatives	Diphenylmethanes	687	-4.8	-5.7957	-5.8	4.8	5.7957	5.8	1.15742	0.814349	0.47	0.728	0.715	0.177	0.38475	16	2	2	0	0	0	0	0	3	266.388	7.7922	22	0	2	2	0	0	2	0.136364	22	1	0	104.348	42	0	0	0	0	0	0	2	0
Benzoclidine	ZINC000000135992	Benzene and substituted derivatives	Benzoic acids and derivatives	688	-4.95	-6.76219	-6.7	4.95	6.76219	6.7	0.868367	0.527647	0.384	0.213	0.229	0.07	0.18825	13	1	1	0	0	2	0	0	3	231.295	5.9975	19	2	1	1	0	0	1	0.157895	19	2	0	81.9434	34	0	0	0	0	0	0	1	2
Benzoclidine	ZINC000000135992	Benzene and substituted derivatives	Benzoic acids and derivatives	689	-4.02	-6.77858	-6.7	4.02	6.77858	6.7	1.0439	0.64006	0.852	0.208	0.229	0.126	0.33325	13	1	1	0	0	2	0	0	3	231.295	5.9975	19	2	1	1	0	0	1	0.157895	19	2	0	81.9434	34	0	0	0	0	0	0	1	2
Benzoclidine	ZINC000000135992	Benzene and substituted derivatives	Benzoic acids and derivatives	690	-4.47	-5.97943	-5.9	4.47	5.97943	5.9	1.34601	0.820033	0.648	0.621	0.662	0.268	0.4615	13	1	1	0	0	2	0	0	3	231.295	5.9975	19	2	1	1	0	0	1	0.157895	19	2	0	81.9434	34	0	0	0	0	0	0	1	2
Naproxen	ZINC000000105216	Naphthalenes	?	691	-3.86	-6.72729	-6.7	3.86	6.72729	6.7	3.15022	2.1818	0.9	0.227	0.229	0.963	0.76375	10	4	0	0	0	3	0	0	2	229.255	5.518	15	3	0	1	1	0	0	0.166667	18	0	0	78.5905	30	0	0	0	0	0	0	0	3
Naproxen	ZINC000000105216	Naphthalenes	?	692	-4.27	-6.42642	-6.4	4.27	6.42642	6.4	2.22903	1.52193	0.751	0.367	0.362	0.667	0.61175	10	4	0	0	0	3	0	0	2	229.255	5.518	15	3	0	1	1	0	0	0.166667	18	0	0	78.5905	30	0	0	0	0	0	0	0	3
Naproxen	ZINC000000105216	Naphthalenes	?	693	-3.63	-6.17121	-6.2	3.63	6.17121	6.2	0.921189	0.308523	0.948	0.512	0.474	0.083	0.397	10	4	0	0	0	3	0	0	2	229.255	5.518	15	3	0	1	1	0	0	0.166667	18	0	0	78.5905	30	0	0	0	0	0	0	0	3
Fenoxazoline	ZINC000000001437	Benzene and substituted derivatives	Cumenes	694	-4.97	-5.78896	-5.8	4.97	5.78896	5.8	2.30731	1.59862	0.372	0.73	0.715	0.696	0.61975	9	4	2	0	0	1	0	0	2	218.3	5.7519	21	3	1	1	0	0	1	0.235294	17	1	0	80.2108	34	0	0	0	0	0	0	2	1
Fenoxazoline	ZINC000000001437	Benzene and substituted derivatives	Cumenes	695	-4.42	-6.10985	-6.1	4.42	6.10985	6.1	2.44195	1.65972	0.677	0.547	0.538	0.748	0.67775	9	4	2	0	0	1	0	0	2	218.3	5.7519	21	3	1	1	0	0	1	0.235294	17	1	0	80.2108	34	0	0	0	0	0	0	2	1
Fenoxazoline	ZINC000000001437	Benzene and substituted derivatives	Cumenes	696	-4.4	-5.62591	-5.8	4.4	5.62591	5.8	3.01189	0.828075	0.688	0.81	0.715	0.935	0.81825	9	4	2	0	0	1	0	0	2	218.3	5.7519	21	3	1	1	0	0	1	0.235294	17	1	0	80.2108	34	0	0	0	0	0	0	2	1
Ciprefadol	ZINC000003776671	Benzene and substituted derivatives	Cyclohexylphenols	697	-4.34	-4.60606	-4.4	4.34	4.60606	4.4	2.03762	1.16646	0.719	0.987	0.994	0.583	0.71975	18	1	1	0	0	1	0	0	4	285.431	8.8533	28	1	2	2	0	0	1	0.125	24	1	0	115.172	48	0	0	0	0	0	0	1	1
Homosalate	ZINC000000393813	Benzene and substituted derivatives	Benzoic acids and derivatives	698	-4.62	-6.67463	-6.5	4.62	6.67463	6.5	1.63632	1.03297	0.564	0.247	0.313	0.398	0.41825	12	4	0	0	0	3	0	0	2	262.349	7.0078	25	3	1	1	0	0	0	0.15	20	0	0	99.4185	41	0	0	0	0	0	0	0	3
Homosalate	ZINC000000393813	Benzene and substituted derivatives	Benzoic acids and derivatives	699	-4.43	-5.66311	-5.5	4.43	5.66311	5.5	1.54412	0.846656	0.669	0.788	0.852	0.359	0.55975	12	4	0	0	0	3	0	0	2	262.349	7.0078	25	3	1	1	0	0	0	0.15	20	0	0	99.4185	41	0	0	0	0	0	0	0	3
Homosalate	ZINC000000393813	Benzene and substituted derivatives	Benzoic acids and derivatives	700	-4.22	-6.69068	-6.5	4.22	6.69068	6.5	0.810822	0.434605	0.772	0.241	0.313	0.055	0.29875	12	4	0	0	0	3	0	0	2	262.349	7.0078	25	3	1	1	0	0	0	0.15	20	0	0	99.4185	41	0	0	0	0	0	0	0	3
Ibuprofen-piconol	ZINC000001851415	Prenol lipids	Monoterpenoids	701	-5.33	-7.23069	-7.1	5.33	7.23069	7.1	0.990282	0.618009	0.2	0.077	0.101	0.103	0.12675	11	8	1	0	0	2	0	0	2	297.398	8.0112	26	3	0	0	0	0	0	0.304348	23	1	0	113.094	45	0	0	0	0	0	0	1	2
Ibuprofen-piconol	ZINC000001851415	Prenol lipids	Monoterpenoids	702	-5.19	-6.43503	-6.4	5.19	6.43503	6.4	0.954597	0.633283	0.259	0.363	0.362	0.093	0.20175	11	8	1	0	0	2	0	0	2	297.398	8.0112	26	3	0	0	0	0	0	0.304348	23	1	0	113.094	45	0	0	0	0	0	0	1	2
Ibuprofen-piconol	ZINC000001851415	Prenol lipids	Monoterpenoids	703	-4.91	-7.21591	-7.2	4.91	7.21591	7.2	0.838086	0.539288	0.409	0.082	0.08	0.062	0.15325	11	8	1	0	0	2	0	0	2	297.398	8.0112	26	3	0	0	0	0	0	0.304348	23	1	0	113.094	45	0	0	0	0	0	0	1	2
Acequinoline	ZINC000001481715	Quinolines and derivatives	?	704	-4.06	-6.29775	-6.3	4.06	6.29775	6.3	0.909499	0.636035	0.836	0.437	0.421	0.081	0.35475	9	5	1	0	0	2	0	0	2	229.279	5.6574	18	3	0	0	0	0	0	0.111111	18	1	0	84.2165	32	0	0	0	0	0	0	1	2
Acequinoline	ZINC000001481715	Quinolines and derivatives	?	705	-4.38	-5.73356	-5.7	4.38	5.73356	5.7	1.28331	0.839096	0.698	0.757	0.763	0.238	0.48425	9	5	1	0	0	2	0	0	2	229.279	5.6574	18	3	0	0	0	0	0	0.111111	18	1	0	84.2165	32	0	0	0	0	0	0	1	2
Octisalate	ZINC000002041028	Benzene and substituted derivatives	Benzoic acids and derivatives	706	-4.23	-5.93436	-5.9	4.23	5.93436	5.9	1.92774	0.98814	0.768	0.648	0.662	0.533	0.624	6	9	0	0	0	3	0	0	1	250.338	7.0078	25	3	1	1	0	0	0	0.444444	18	0	0	96.9855	40	0	0	0	0	0	0	0	3
Octisalate	ZINC000002041028	Benzene and substituted derivatives	Benzoic acids and derivatives	707	-4.84	-6.00179	-6.1	4.84	6.00179	6.1	2.18371	1.05774	0.446	0.608	0.538	0.651	0.5715	6	9	0	0	0	3	0	0	1	250.338	7.0078	25	3	1	1	0	0	0	0.444444	18	0	0	96.9855	40	0	0	0	0	0	0	0	3
Octisalate	ZINC000002041028	Benzene and substituted derivatives	Benzoic acids and derivatives	708	-4.48	-6.2244	-6.1	4.48	6.2244	6.1	2.15781	1.30851	0.643	0.477	0.538	0.64	0.61525	6	9	0	0	0	3	0	0	1	250.338	7.0078	25	3	1	1	0	0	0	0.444444	18	0	0	96.9855	40	0	0	0	0	0	0	0	3
Seclazone	ZINC000002011672	Benzoxazines	?	709	-4.13	-5.85437	-5.9	4.13	5.85437	5.9	1.8462	1.29392	0.812	0.697	0.662	0.491	0.614	10	0	1	0	2	1	0	0	3	225.631	3.6668	12	4	0	0	0	0	0	0	17	2	0	58.9347	23	1	0	0	1	0	0	1	3
Seclazone	ZINC000002011672	Benzoxazines	?	710	-4.13	-6.27813	-6.3	4.13	6.27813	6.3	1.52027	1.04524	0.812	0.448	0.421	0.35	0.48325	10	0	1	0	2	1	0	0	3	225.631	3.6668	12	4	0	0	0	0	0	0	17	2	0	58.9347	23	1	0	0	1	0	0	1	3
Seclazone	ZINC000002011672	Benzoxazines	?	711	-4.18	-5.85306	-5.9	4.18	5.85306	5.9	0.268306	0.176772	0.789	0.698	0.662	0.001	0.36325	10	0	1	0	2	1	0	0	3	225.631	3.6668	12	4	0	0	0	0	0	0	17	2	0	58.9347	23	1	0	0	1	0	0	1	3
Menbutone	ZINC000000000446	Benzene and substituted derivatives	Butyrophenones	712	-4.01	-6.4479	-6.5	4.01	6.4479	6.5	2.57856	1.77269	0.856	0.355	0.313	0.796	0.69025	10	5	0	0	0	4	0	0	2	257.265	5.3526	16	4	0	1	1	0	0	0.25	20	0	0	83.819	32	0	0	0	0	0	0	0	4
Menbutone	ZINC000000000446	Benzene and substituted derivatives	Butyrophenones	713	-4.35	-5.72677	-5.8	4.35	5.72677	5.8	1.57694	0.906844	0.713	0.761	0.715	0.373	0.5435	10	5	0	0	0	4	0	0	2	257.265	5.3526	16	4	0	1	1	0	0	0.25	20	0	0	83.819	32	0	0	0	0	0	0	0	4
Menbutone	ZINC000000000446	Benzene and substituted derivatives	Butyrophenones	714	-4.33	-6.45964	-6.5	4.33	6.45964	6.5	1.61975	1.10536	0.724	0.349	0.313	0.39	0.45425	10	5	0	0	0	4	0	0	2	257.265	5.3526	16	4	0	1	1	0	0	0.25	20	0	0	83.819	32	0	0	0	0	0	0	0	4
Ibuprofen_guaiacol_ester	ZINC000000363995	Prenol lipids	Monoterpenoids	715	-5.09	-6.70487	-6.7	5.09	6.70487	6.7	1.9915	1.28915	0.31	0.236	0.229	0.559	0.41425	12	8	0	0	0	3	0	0	2	312.409	8.7619	27	3	0	0	0	0	0	0.291667	24	0	0	118.482	47	0	0	0	0	0	0	0	3
Ibuprofen_guaiacol_ester	ZINC000000363995	Prenol lipids	Monoterpenoids	716	-5.19	-6.60976	-7.3	5.19	6.60976	7.3	2.1043	0.777515	0.259	0.272	0.061	0.616	0.388	12	8	0	0	0	3	0	0	2	312.409	8.7619	27	3	0	0	0	0	0	0.291667	24	0	0	118.482	47	0	0	0	0	0	0	0	3
Ibuprofen_guaiacol_ester	ZINC000000363995	Prenol lipids	Monoterpenoids	717	-4.38	-7.38605	-7.3	4.38	7.38605	7.3	1.93778	1.30626	0.698	0.053	0.061	0.536	0.45775	12	8	0	0	0	3	0	0	2	312.409	8.7619	27	3	0	0	0	0	0	0.291667	24	0	0	118.482	47	0	0	0	0	0	0	0	3
Seletracetam	ZINC000011726774	Carboxylic acids and derivatives	Amino acids, peptides, and analogues	718	-4.37	-5.67946	-5.6	4.37	5.67946	5.6	1.66005	0.623518	0.702	0.78	0.81	0.407	0.5815	4	6	1	1	0	2	0	0	1	232.23	4.6869	18	4	1	0	0	0	0	0.25	16	1	0	66.091	30	2	0	0	0	0	2	2	2
Seletracetam	ZINC000011726774	Carboxylic acids and derivatives	Amino acids, peptides, and analogues	719	-4.71	-5.43203	-5.5	4.71	5.43203	5.5	1.3033	0.89349	0.516	0.882	0.852	0.246	0.465	4	6	1	1	0	2	0	0	1	232.23	4.6869	18	4	1	0	0	0	0	0.25	16	1	0	66.091	30	2	0	0	0	0	2	2	2
Seletracetam	ZINC000011726774	Carboxylic acids and derivatives	Amino acids, peptides, and analogues	720	-4.62	-5.40692	-5.4	4.62	5.40692	5.4	2.13025	1.50003	0.564	0.89	0.888	0.629	0.6775	4	6	1	1	0	2	0	0	1	232.23	4.6869	18	4	1	0	0	0	0	0.25	16	1	0	66.091	30	2	0	0	0	0	2	2	2
Pheneturide	ZINC000000000274	Benzene and substituted derivatives	Phenylacetamides	721	-4.56	-6.52655	-6.5	4.56	6.52655	6.5	2.20393	1.54948	0.601	0.311	0.313	0.66	0.5585	6	5	0	2	0	2	0	0	1	206.245	4.6988	18	4	2	1	0	0	0	0.333333	15	0	0	71.4492	29	0	0	0	0	0	0	2	2
Pheneturide	ZINC000000000274	Benzene and substituted derivatives	Phenylacetamides	722	-4.2	-6.51916	-6.5	4.2	6.51916	6.5	2.3802	1.67026	0.781	0.316	0.313	0.724	0.6355	6	5	0	2	0	2	0	0	1	206.245	4.6988	18	4	2	1	0	0	0	0.333333	15	0	0	71.4492	29	0	0	0	0	0	0	2	2
Pheneturide	ZINC000000000274	Benzene and substituted derivatives	Phenylacetamides	723	-4.31	-6.51549	-6.5	4.31	6.51549	6.5	2.2979	1.61811	0.734	0.319	0.313	0.692	0.60775	6	5	0	2	0	2	0	0	1	206.245	4.6988	18	4	2	1	0	0	0	0.333333	15	0	0	71.4492	29	0	0	0	0	0	0	2	2
Trimethyldiphenylpropylamine	ZINC000002015732	Benzene and substituted derivatives	Diphenylmethanes	724	-4.68	-6.53126	-6.6	4.68	6.53126	6.6	1.41012	0.971114	0.533	0.31	0.268	0.3	0.35025	12	6	0	1	0	0	0	0	2	253.389	8.4811	23	0	1	1	0	0	1	0.25	20	0	0	108.395	42	0	0	0	0	0	0	1	0
Trimethyldiphenylpropylamine	ZINC000002015732	Benzene and substituted derivatives	Diphenylmethanes	725	-4.3	-6.91343	-6.8	4.3	6.91343	6.8	3.25578	2.26035	0.738	0.158	0.194	0.977	0.7215	12	6	0	1	0	0	0	0	2	253.389	8.4811	23	0	1	1	0	0	1	0.25	20	0	0	108.395	42	0	0	0	0	0	0	1	0
Trimethyldiphenylpropylamine	ZINC000002015732	Benzene and substituted derivatives	Diphenylmethanes	726	-3.92	-6.35425	-6.4	3.92	6.35425	6.4	3.40373	1.6482	0.883	0.406	0.362	0.986	0.80425	12	6	0	1	0	0	0	0	2	253.389	8.4811	23	0	1	1	0	0	1	0.25	20	0	0	108.395	42	0	0	0	0	0	0	1	0
Paxamate	ZINC000000001892	Benzene and substituted derivatives	Biphenyls and derivatives	727	-5.03	-6.24784	-6.3	5.03	6.24784	6.3	1.79664	0.457733	0.342	0.464	0.421	0.469	0.42525	12	2	0	1	0	2	0	0	2	227.263	5.5712	16	3	1	1	0	0	0	0.222222	18	0	0	80.2144	30	0	0	0	0	0	0	1	2
Paxamate	ZINC000000001892	Benzene and substituted derivatives	Biphenyls and derivatives	728	-4.76	-7.35426	-7.3	4.76	7.35426	7.3	1.7906	1.25866	0.49	0.057	0.061	0.465	0.37025	12	2	0	1	0	2	0	0	2	227.263	5.5712	16	3	1	1	0	0	0	0.222222	18	0	0	80.2144	30	0	0	0	0	0	0	1	2
Paxamate	ZINC000000001892	Benzene and substituted derivatives	Biphenyls and derivatives	729	-5.22	-6.30834	-6.3	5.22	6.30834	6.3	1.53329	0.909016	0.243	0.429	0.421	0.355	0.3435	12	2	0	1	0	2	0	0	2	227.263	5.5712	16	3	1	1	0	0	0	0.222222	18	0	0	80.2144	30	0	0	0	0	0	0	1	2
Niflumic-acid	ZINC000000125031	Benzene and substituted derivatives	Trifluoromethylbenzenes	730	-4.76	-6.69336	-6.9	4.76	6.69336	6.9	0.937625	0.653744	0.49	0.239	0.158	0.088	0.206	11	2	1	1	0	2	0	0	2	281.213	4.9884	11	3	1	2	1	0	0	0.190476	21	1	0	72.1614	28	3	0	0	0	0	3	2	2
Niflumic-acid	ZINC000000125031	Benzene and substituted derivatives	Trifluoromethylbenzenes	731	-4.34	-7.07778	-7.1	4.34	7.07778	7.1	1.95763	1.33382	0.719	0.109	0.101	0.544	0.477	11	2	1	1	0	2	0	0	2	281.213	4.9884	11	3	1	2	1	0	0	0.190476	21	1	0	72.1614	28	3	0	0	0	0	3	2	2
Niflumic-acid	ZINC000000125031	Benzene and substituted derivatives	Trifluoromethylbenzenes	732	-4.92	-6.82662	-6.8	4.92	6.82662	6.8	2.00516	0.796443	0.403	0.188	0.194	0.565	0.43175	11	2	1	1	0	2	0	0	2	281.213	4.9884	11	3	1	2	1	0	0	0.190476	21	1	0	72.1614	28	3	0	0	0	0	3	2	2
Agomelatine	ZINC000000005608	Carboxylic acids and derivatives	Carboxylic acid derivatives	733	-5.12	-6.3049	-6.3	5.12	6.3049	6.3	2.70329	1.47607	0.295	0.432	0.421	0.838	0.598	10	5	0	1	0	2	0	0	2	243.306	6.2738	20	3	1	1	0	0	0	0.263158	19	0	0	90.7034	35	0	0	0	0	0	0	1	2
Agomelatine	ZINC000000005608	Carboxylic acids and derivatives	Carboxylic acid derivatives	734	-5.51	-6.64985	-6.6	5.51	6.64985	6.6	2.25817	1.51593	0.141	0.26	0.268	0.68	0.44225	10	5	0	1	0	2	0	0	2	243.306	6.2738	20	3	1	1	0	0	0	0.263158	19	0	0	90.7034	35	0	0	0	0	0	0	1	2
Agomelatine	ZINC000000005608	Carboxylic acids and derivatives	Carboxylic acid derivatives	735	-5.52	-6.67354	-6.6	5.52	6.67354	6.6	2.46556	1.65518	0.138	0.248	0.268	0.756	0.4795	10	5	0	1	0	2	0	0	2	243.306	6.2738	20	3	1	1	0	0	0	0.263158	19	0	0	90.7034	35	0	0	0	0	0	0	1	2
Tofetridine	ZINC000031538739	Quinolines and derivatives	Benzoquinolines	736	-4.26	-6.82651	-6.8	4.26	6.82651	6.8	2.05067	1.4458	0.756	0.188	0.194	0.589	0.532	13	2	1	0	0	1	0	0	3	231.339	7.4598	22	1	1	0	0	0	1	0.0526316	19	1	0	91.0103	38	0	0	0	0	0	0	1	1
Tofetridine	ZINC000031538739	Quinolines and derivatives	Benzoquinolines	737	-4.19	-6.83019	-6.8	4.19	6.83019	6.8	1.75547	1.22483	0.784	0.185	0.194	0.452	0.4705	13	2	1	0	0	1	0	0	3	231.339	7.4598	22	1	1	0	0	0	1	0.0526316	19	1	0	91.0103	38	0	0	0	0	0	0	1	1
Tofetridine	ZINC000031538739	Quinolines and derivatives	Benzoquinolines	738	-4.32	-6.82721	-6.8	4.32	6.82721	6.8	1.71821	1.20693	0.729	0.187	0.194	0.436	0.44875	13	2	1	0	0	1	0	0	3	231.339	7.4598	22	1	1	0	0	0	1	0.0526316	19	1	0	91.0103	38	0	0	0	0	0	0	1	1
Tiaprofenic-acid	ZINC000000000767	Organooxygen compounds	Carbonyl compounds	739	-4.21	-5.75868	-5.8	4.21	5.75868	5.8	2.77126	1.30076	0.777	0.745	0.715	0.866	0.806	10	4	0	0	0	3	0	1	2	259.306	4.9844	13	4	0	1	1	0	0	0.210526	19	1	0	80.23	29	0	0	0	0	0	0	0	3
Tiaprofenic-acid	ZINC000000000767	Organooxygen compounds	Carbonyl compounds	740	-4.75	-6.96282	-7	4.75	6.96282	7	2.82773	1.19774	0.495	0.142	0.129	0.885	0.5985	10	4	0	0	0	3	0	1	2	259.306	4.9844	13	4	0	1	1	0	0	0.210526	19	1	0	80.23	29	0	0	0	0	0	0	0	3
Tiaprofenic-acid	ZINC000000000767	Organooxygen compounds	Carbonyl compounds	741	-5.17	-6.96271	-7	5.17	6.96271	7	0.641362	0.17868	0.269	0.143	0.129	0.025	0.112	10	4	0	0	0	3	0	1	2	259.306	4.9844	13	4	0	1	1	0	0	0.210526	19	1	0	80.23	29	0	0	0	0	0	0	0	3
Profexalone	ZINC000002019921	Azolidines	Oxazolidines	742	-5.22	-6.39011	-6.4	5.22	6.39011	6.4	3.09348	2.14068	0.243	0.385	0.362	0.953	0.62775	9	4	1	1	1	2	0	0	2	248.282	5.761	21	5	1	1	0	0	0	0.263158	19	1	0	80.6946	34	0	0	0	0	0	0	2	3
Profexalone	ZINC000002019921	Azolidines	Oxazolidines	743	-4.48	-6.60592	-6.6	4.48	6.60592	6.6	2.94984	2.07399	0.643	0.275	0.268	0.918	0.68675	9	4	1	1	1	2	0	0	2	248.282	5.761	21	5	1	1	0	0	0	0.263158	19	1	0	80.6946	34	0	0	0	0	0	0	2	3
Profexalone	ZINC000002019921	Azolidines	Oxazolidines	744	-4.65	-6.03996	-6	4.65	6.03996	6	3.44729	2.3459	0.547	0.588	0.6	0.987	0.78025	9	4	1	1	1	2	0	0	2	248.282	5.761	21	5	1	1	0	0	0	0.263158	19	1	0	80.6946	34	0	0	0	0	0	0	2	3
Xenbucin	ZINC000002015169	Benzene and substituted derivatives	Biphenyls and derivatives	745	-3.73	-6.88217	-6.8	3.73	6.88217	6.8	1.81524	0.433521	0.929	0.169	0.194	0.477	0.51925	12	4	0	0	0	2	0	0	2	239.294	6.3117	16	2	0	1	1	0	0	0.210526	19	0	0	86.9495	33	0	0	0	0	0	0	0	2
Xenbucin	ZINC000002015169	Benzene and substituted derivatives	Biphenyls and derivatives	746	-3.53	-5.87046	-5.8	3.53	5.87046	5.8	1.72799	0.720253	0.963	0.689	0.715	0.442	0.6405	12	4	0	0	0	2	0	0	2	239.294	6.3117	16	2	0	1	1	0	0	0.210526	19	0	0	86.9495	33	0	0	0	0	0	0	0	2
Xenbucin	ZINC000002015169	Benzene and substituted derivatives	Biphenyls and derivatives	747	-3.66	-6.87639	-6.8	3.66	6.87639	6.8	1.82339	0.657753	0.942	0.171	0.194	0.48	0.524	12	4	0	0	0	2	0	0	2	239.294	6.3117	16	2	0	1	1	0	0	0.210526	19	0	0	86.9495	33	0	0	0	0	0	0	0	2
Ibuverine	ZINC000000000382	Benzene and substituted derivatives	?	748	-3.81	-5.77265	-5.6	3.81	5.77265	5.6	2.80838	1.83505	0.912	0.737	0.81	0.879	0.87	12	6	0	0	0	3	0	0	2	290.403	7.8038	29	3	1	1	0	1	0	0.272727	22	0	0	112.321	47	0	0	0	0	0	0	0	3
Ibuverine	ZINC000000000382	Benzene and substituted derivatives	?	749	-3.3	-5.42413	-5.8	3.3	5.42413	5.8	2.55806	1.01643	0.984	0.884	0.715	0.786	0.81775	12	6	0	0	0	3	0	0	2	290.403	7.8038	29	3	1	1	0	1	0	0.272727	22	0	0	112.321	47	0	0	0	0	0	0	0	3
Ibuverine	ZINC000000000382	Benzene and substituted derivatives	?	750	-3.59	-5.5623	-5.7	3.59	5.5623	5.7	2.67202	1.44781	0.954	0.834	0.763	0.829	0.84375	12	6	0	0	0	3	0	0	2	290.403	7.8038	29	3	1	1	0	1	0	0.272727	22	0	0	112.321	47	0	0	0	0	0	0	0	3
Triafungin	ZINC000000002210	Triazines	1,2,4-triazines	751	-5.15	-7.56937	-7.6	5.15	7.56937	7.6	0.627523	0.405867	0.281	0.028	0.024	0.025	0.08875	12	1	4	0	0	0	0	0	3	222.251	3.507	14	4	0	0	0	0	0	0.105263	19	2	0	75.151	27	0	0	0	0	0	0	4	0
Triafungin	ZINC000000002210	Triazines	1,2,4-triazines	752	-4.92	-7.57137	-7.6	4.92	7.57137	7.6	0.554535	0.360619	0.403	0.028	0.024	0.017	0.11525	12	1	4	0	0	0	0	0	3	222.251	3.507	14	4	0	0	0	0	0	0.105263	19	2	0	75.151	27	0	0	0	0	0	0	4	0
Triafungin	ZINC000000002210	Triazines	1,2,4-triazines	753	-4.9	-6.59283	-6.6	4.9	6.59283	6.6	0.840624	0.577869	0.413	0.281	0.268	0.063	0.20175	12	1	4	0	0	0	0	0	3	222.251	3.507	14	4	0	0	0	0	0	0.105263	19	2	0	75.151	27	0	0	0	0	0	0	4	0
Benproperine	ZINC000001481729	Benzene and substituted derivatives	Diphenylmethanes	754	-4.95	-7.39131	-7.4	4.95	7.39131	7.4	3.05912	1.46486	0.384	0.052	0.045	0.947	0.58075	17	4	1	0	0	1	0	0	3	309.453	10.0135	28	1	1	1	0	0	1	0.24	25	1	0	124.1	50	0	0	0	0	0	0	1	1
Benproperine	ZINC000001481729	Benzene and substituted derivatives	Diphenylmethanes	755	-6.12	-7.35231	-7.4	6.12	7.35231	7.4	1.17182	0.743099	0.031	0.057	0.045	0.185	0.1115	17	4	1	0	0	1	0	0	3	309.453	10.0135	28	1	1	1	0	0	1	0.24	25	1	0	124.1	50	0	0	0	0	0	0	1	1
Benproperine	ZINC000001481729	Benzene and substituted derivatives	Diphenylmethanes	756	-5.53	-7.71274	-7.7	5.53	7.71274	7.7	2.79725	1.2873	0.134	0.018	0.016	0.874	0.4745	17	4	1	0	0	1	0	0	3	309.453	10.0135	28	1	1	1	0	0	1	0.24	25	1	0	124.1	50	0	0	0	0	0	0	1	1
Emixustat	ZINC000059126886	Phenol ethers	?	757	-5.08	-6.80334	-6.6	5.08	6.80334	6.6	1.73795	0.309756	0.315	0.198	0.268	0.445	0.36825	12	4	0	1	0	2	0	0	2	263.381	8.166	27	2	2	1	0	1	0	0.3	20	0	0	105.943	44	0	0	0	0	0	0	1	2
Emixustat	ZINC000059126886	Phenol ethers	?	758	-5.5	-7.36144	-7.1	5.5	7.36144	7.1	2.05358	0.920335	0.144	0.056	0.101	0.59	0.35625	12	4	0	1	0	2	0	0	2	263.381	8.166	27	2	2	1	0	1	0	0.3	20	0	0	105.943	44	0	0	0	0	0	0	1	2
Emixustat	ZINC000059126886	Phenol ethers	?	759	-5.08	-7.36428	-7.1	5.08	7.36428	7.1	1.78087	0.813962	0.315	0.056	0.101	0.461	0.3345	12	4	0	1	0	2	0	0	2	263.381	8.166	27	2	2	1	0	1	0	0.3	20	0	0	105.943	44	0	0	0	0	0	0	1	2
Alphaprodine	ZINC000001087483	Piperidines	Phenylpiperidines	760	-3.18	-3.34381	-3.9	3.18	3.34381	3.9	2.14198	0.748241	0.991	1	0.998	0.632	0.81325	11	5	1	0	0	2	0	0	2	261.365	7.3261	25	2	1	1	0	0	1	0.2	20	1	0	99.6749	42	0	0	0	0	0	0	1	2
Alphaprodine	ZINC000001087483	Piperidines	Phenylpiperidines	761	-3.17	-4.65802	-4.6	3.17	4.65802	4.6	1.95417	1.28108	0.991	0.987	0.988	0.543	0.76625	11	5	1	0	0	2	0	0	2	261.365	7.3261	25	2	1	1	0	0	1	0.2	20	1	0	99.6749	42	0	0	0	0	0	0	1	2
Alphaprodine	ZINC000001087483	Piperidines	Phenylpiperidines	762	-3.64	-3.98605	-4	3.64	3.98605	4	2.39647	1.25541	0.947	0.998	0.998	0.73	0.85125	11	5	1	0	0	2	0	0	2	261.365	7.3261	25	2	1	1	0	0	1	0.2	20	1	0	99.6749	42	0	0	0	0	0	0	1	2
Dibemethine	ZINC000001234761	Benzene and substituted derivatives	Phenylmethylamines	763	-4.01	-6.03111	-5.9	4.01	6.03111	5.9	0.485469	0.15809	0.856	0.592	0.662	0.011	0.385	12	3	0	1	0	0	0	0	2	211.308	6.3607	17	0	1	1	0	0	1	0.235294	17	0	0	87.6317	33	0	0	0	0	0	0	1	0
Dibemethine	ZINC000001234761	Benzene and substituted derivatives	Phenylmethylamines	764	-4.31	-5.70614	-6	4.31	5.70614	6	1.46856	0.131756	0.734	0.769	0.6	0.328	0.4975	12	3	0	1	0	0	0	0	2	211.308	6.3607	17	0	1	1	0	0	1	0.235294	17	0	0	87.6317	33	0	0	0	0	0	0	1	0
Dibemethine	ZINC000001234761	Benzene and substituted derivatives	Phenylmethylamines	765	-4.04	-6.04613	-5.9	4.04	6.04613	5.9	1.35635	0.235807	0.844	0.584	0.662	0.274	0.5135	12	3	0	1	0	0	0	0	2	211.308	6.3607	17	0	1	1	0	0	1	0.235294	17	0	0	87.6317	33	0	0	0	0	0	0	1	0
Colfenamate	ZINC000000001214	Benzene and substituted derivatives	Benzoic acids and derivatives	766	-6.53	-7.64808	-7.7	6.53	7.64808	7.7	1.21821	0.326288	0.009	0.023	0.016	0.207	0.10975	12	4	0	2	0	3	0	0	2	338.285	6.1553	18	4	2	1	0	0	0	0.28	25	0	0	93.4397	37	3	0	0	0	0	3	2	3
Colfenamate	ZINC000000001214	Benzene and substituted derivatives	Benzoic acids and derivatives	767	-6.05	-7.65209	-7.6	6.05	7.65209	7.6	2.58647	1.28974	0.04	0.022	0.024	0.799	0.4155	12	4	0	2	0	3	0	0	2	338.285	6.1553	18	4	2	1	0	0	0	0.28	25	0	0	93.4397	37	3	0	0	0	0	3	2	3
Colfenamate	ZINC000000001214	Benzene and substituted derivatives	Benzoic acids and derivatives	768	-6.4	-7.65854	-7.7	6.4	7.65854	7.7	1.38811	0.442179	0.013	0.022	0.016	0.29	0.15225	12	4	0	2	0	3	0	0	2	338.285	6.1553	18	4	2	1	0	0	0	0.28	25	0	0	93.4397	37	3	0	0	0	0	3	2	3
Phenacemide	ZINC000000001916	Benzene and substituted derivatives	Phenylacetamides	769	-4.63	-5.76913	-6	4.63	5.76913	6	1.60116	0.583686	0.556	0.739	0.6	0.383	0.4805	6	3	0	2	0	2	0	0	1	178.191	3.2852	14	4	2	1	0	0	0	0.307692	13	0	0	57.6072	23	0	0	0	0	0	0	2	2
Phenacemide	ZINC000000001916	Benzene and substituted derivatives	Phenylacetamides	770	-4.8	-6.66771	-6.7	4.8	6.66771	6.7	1.23264	0.803777	0.47	0.251	0.229	0.215	0.28225	6	3	0	2	0	2	0	0	1	178.191	3.2852	14	4	2	1	0	0	0	0.307692	13	0	0	57.6072	23	0	0	0	0	0	0	2	2
Phenacemide	ZINC000000001916	Benzene and substituted derivatives	Phenylacetamides	771	-4.72	-6.69269	-6.7	4.72	6.69269	6.7	1.43214	0.932399	0.511	0.24	0.229	0.311	0.3405	6	3	0	2	0	2	0	0	1	178.191	3.2852	14	4	2	1	0	0	0	0.307692	13	0	0	57.6072	23	0	0	0	0	0	0	2	2
Piridocaine	ZINC000001996127	Benzene and substituted derivatives	Benzoic acids and derivatives	772	-5.67	-6.93862	-6.8	5.67	6.93862	6.8	1.17264	0.468931	0.098	0.149	0.194	0.186	0.166	11	3	1	1	0	2	0	0	2	248.326	7.1407	23	3	2	0	0	0	1	0.263158	19	1	0	91.2556	38	0	0	0	0	0	0	2	2
Piridocaine	ZINC000001996127	Benzene and substituted derivatives	Benzoic acids and derivatives	773	-5.65	-6.94163	-6.8	5.65	6.94163	6.8	1.28301	0.693163	0.101	0.148	0.194	0.238	0.19275	11	3	1	1	0	2	0	0	2	248.326	7.1407	23	3	2	0	0	0	1	0.263158	19	1	0	91.2556	38	0	0	0	0	0	0	2	2
Piridocaine	ZINC000001996127	Benzene and substituted derivatives	Benzoic acids and derivatives	774	-5.76	-6.55494	-6.7	5.76	6.55494	6.7	0.958598	0.200952	0.081	0.298	0.229	0.094	0.1245	11	3	1	1	0	2	0	0	2	248.326	7.1407	23	3	2	0	0	0	1	0.263158	19	1	0	91.2556	38	0	0	0	0	0	0	2	2
Lofemizole	ZINC000000001627	Azoles	Imidazoles	775	-4.38	-5.78501	-5.7	4.38	5.78501	5.7	1.62516	0.905718	0.698	0.731	0.763	0.393	0.56175	9	1	2	0	0	0	0	0	2	192.649	4.367	10	1	1	1	0	0	0	0.0714286	14	1	0	63.4184	22	1	0	0	1	0	0	2	0
Lofemizole	ZINC000000001627	Azoles	Imidazoles	776	-4.37	-5.01906	-5	4.37	5.01906	5	1.52451	0.266402	0.702	0.963	0.963	0.352	0.59225	9	1	2	0	0	0	0	0	2	192.649	4.367	10	1	1	1	0	0	0	0.0714286	14	1	0	63.4184	22	1	0	0	1	0	0	2	0
Lofemizole	ZINC000000001627	Azoles	Imidazoles	777	-4.13	-5.63197	-5.6	4.13	5.63197	5.6	1.56989	1.04567	0.812	0.806	0.81	0.371	0.591	9	1	2	0	0	0	0	0	2	192.649	4.367	10	1	1	1	0	0	0	0.0714286	14	1	0	63.4184	22	1	0	0	1	0	0	2	0
Diazoxide	ZINC000003872277	Thiadiazines	Benzothiadiazines	778	-5.09	-5.45397	-5.5	5.09	5.45397	5.5	1.12969	0.78959	0.31	0.872	0.852	0.165	0.373	7	1	2	0	0	2	0	1	2	230.676	3.5499	11	4	1	1	0	0	1	0	15	1	0	56.7188	21	1	0	0	1	0	0	2	2
Diazoxide	ZINC000003872277	Thiadiazines	Benzothiadiazines	779	-5.07	-5.44836	-5.4	5.07	5.44836	5.4	0.657183	0.431323	0.32	0.874	0.888	0.027	0.3155	7	1	2	0	0	2	0	1	2	230.676	3.5499	11	4	1	1	0	0	1	0	15	1	0	56.7188	21	1	0	0	1	0	0	2	2
Diazoxide	ZINC000003872277	Thiadiazines	Benzothiadiazines	780	-5.21	-5.98925	-6	5.21	5.98925	6	2.03099	1.43022	0.249	0.614	0.6	0.578	0.50125	7	1	2	0	0	2	0	1	2	230.676	3.5499	11	4	1	1	0	0	1	0	15	1	0	56.7188	21	1	0	0	1	0	0	2	2
Dimefadane	ZINC000002037189	Indanes	?	781	-3.66	-6.07437	-6.2	3.66	6.07437	6.2	0.67088	0.430994	0.942	0.568	0.474	0.03	0.369	15	2	0	1	0	0	0	0	3	237.346	7.2602	19	0	1	1	0	0	1	0.1	20	0	0	97.4047	37	0	0	0	0	0	0	1	0
Dimefadane	ZINC000002037189	Indanes	?	782	-3.99	-5.89574	-6.1	3.99	5.89574	6.1	1.01635	0.672762	0.862	0.674	0.538	0.114	0.407	15	2	0	1	0	0	0	0	3	237.346	7.2602	19	0	1	1	0	0	1	0.1	20	0	0	97.4047	37	0	0	0	0	0	0	1	0
Dimefadane	ZINC000002037189	Indanes	?	783	-3.4	-6.05344	-6.2	3.4	6.05344	6.2	1.56092	1.0901	0.978	0.58	0.474	0.367	0.5465	15	2	0	1	0	0	0	0	3	237.346	7.2602	19	0	1	1	0	0	1	0.1	20	0	0	97.4047	37	0	0	0	0	0	0	1	0
Drofenine	ZINC000001675361	Benzene and substituted derivatives	?	784	-5.54	-6.67851	-6.7	5.54	6.67851	6.7	2.53344	1.72518	0.13	0.246	0.229	0.778	0.47875	12	8	0	1	0	2	0	0	2	317.473	10.5269	33	2	1	1	0	0	1	0.375	24	0	0	129.991	54	0	0	0	0	0	0	1	2
Drofenine	ZINC000001675361	Benzene and substituted derivatives	?	785	-4.66	-6.40078	-6.5	4.66	6.40078	6.5	2.90726	1.35411	0.543	0.38	0.313	0.907	0.6675	12	8	0	1	0	2	0	0	2	317.473	10.5269	33	2	1	1	0	0	1	0.375	24	0	0	129.991	54	0	0	0	0	0	0	1	2
Drofenine	ZINC000001675361	Benzene and substituted derivatives	?	786	-4.91	-6.68163	-6.7	4.91	6.68163	6.7	2.89645	1.35494	0.409	0.245	0.229	0.904	0.6115	12	8	0	1	0	2	0	0	2	317.473	10.5269	33	2	1	1	0	0	1	0.375	24	0	0	129.991	54	0	0	0	0	0	0	1	2
Diphenan	ZINC000000001314	Benzene and substituted derivatives	Diphenylmethanes	787	-4.53	-7.346	-7.3	4.53	7.346	7.3	1.93756	1.34696	0.62	0.058	0.061	0.535	0.43775	12	2	0	1	0	2	0	0	2	227.263	5.483	16	3	1	0	0	0	0	0.222222	18	0	0	79.2358	30	0	0	0	0	0	0	1	2
Diphenan	ZINC000000001314	Benzene and substituted derivatives	Diphenylmethanes	788	-5	-6.55952	-6.5	5	6.55952	6.5	2.19007	0.770728	0.359	0.297	0.313	0.654	0.495	12	2	0	1	0	2	0	0	2	227.263	5.483	16	3	1	0	0	0	0	0.222222	18	0	0	79.2358	30	0	0	0	0	0	0	1	2
Diphenan	ZINC000000001314	Benzene and substituted derivatives	Diphenylmethanes	789	-5.17	-7.29592	-7.3	5.17	7.29592	7.3	0.826397	0.557788	0.269	0.066	0.061	0.059	0.112	12	2	0	1	0	2	0	0	2	227.263	5.483	16	3	1	0	0	0	0	0.222222	18	0	0	79.2358	30	0	0	0	0	0	0	1	2
Tolnidamine	ZINC000000002192	Benzopyrazoles	Indazoles	790	-5.88	-7.40766	-7.4	5.88	7.40766	7.4	2.63477	1.40056	0.061	0.047	0.045	0.819	0.436	13	3	2	0	0	2	0	0	3	299.737	5.9153	14	4	0	1	1	0	0	0.130435	23	1	0	93.159	33	1	0	0	1	0	0	2	2
Tolnidamine	ZINC000000002192	Benzopyrazoles	Indazoles	791	-5.91	-7.35022	-7.4	5.91	7.35022	7.4	2.56999	1.81008	0.059	0.057	0.045	0.792	0.422	13	3	2	0	0	2	0	0	3	299.737	5.9153	14	4	0	1	1	0	0	0.130435	23	1	0	93.159	33	1	0	0	1	0	0	2	2
Hexylcaine	ZINC000002034892	Benzene and substituted derivatives	Benzoic acids and derivatives	792	-4.99	-7.40516	-7.4	4.99	7.40516	7.4	1.17228	0.775291	0.364	0.049	0.045	0.186	0.19525	12	4	0	1	0	2	0	0	2	261.365	8.1476	25	2	1	0	0	0	1	0.3	20	0	0	102.34	42	0	0	0	0	0	0	1	2
Hexylcaine	ZINC000002034892	Benzene and substituted derivatives	Benzoic acids and derivatives	793	-4.94	-7.09219	-7.1	4.94	7.09219	7.1	0.934481	0.571942	0.39	0.105	0.101	0.087	0.16625	12	4	0	1	0	2	0	0	2	261.365	8.1476	25	2	1	0	0	0	1	0.3	20	0	0	102.34	42	0	0	0	0	0	0	1	2
Hexylcaine	ZINC000002034892	Benzene and substituted derivatives	Benzoic acids and derivatives	794	-4.61	-7.08985	-7.1	4.61	7.08985	7.1	1.40132	0.932128	0.569	0.106	0.101	0.296	0.3155	12	4	0	1	0	2	0	0	2	261.365	8.1476	25	2	1	0	0	0	1	0.3	20	0	0	102.34	42	0	0	0	0	0	0	1	2
Exepanol	ZINC000004626743	Benzoxepines	?	795	-4.56	-6.32022	-6.1	4.56	6.32022	6.1	0.670328	0.22008	0.601	0.422	0.538	0.03	0.29975	10	1	0	1	1	1	0	0	2	193.246	4.4496	17	2	2	1	0	1	1	0.0666667	15	1	0	71.5269	29	0	0	0	0	0	0	1	2
Exepanol	ZINC000004626743	Benzoxepines	?	796	-4.42	-6.31814	-6.1	4.42	6.31814	6.1	0.664573	0.168353	0.677	0.423	0.538	0.029	0.31825	10	1	0	1	1	1	0	0	2	193.246	4.4496	17	2	2	1	0	1	1	0.0666667	15	1	0	71.5269	29	0	0	0	0	0	0	1	2
Exepanol	ZINC000004626743	Benzoxepines	?	797	-4.46	-6.31448	-6.1	4.46	6.31448	6.1	1.37582	0.935976	0.652	0.425	0.538	0.283	0.439	10	1	0	1	1	1	0	0	2	193.246	4.4496	17	2	2	1	0	1	1	0.0666667	15	1	0	71.5269	29	0	0	0	0	0	0	1	2
Floxuridine	ZINC000003977743	Pyrimidine nucleosides	Pyrimidine 2-deoxyribonucleosides	798	-5.24	-6.75386	-6.4	5.24	6.75386	6.4	1.3402	0.751623	0.233	0.216	0.362	0.265	0.28125	4	0	2	0	0	2	0	0	2	246.194	0.4035	16	6	3	3	0	2	0	0.111111	18	2	0	65.274	28	1	0	0	0	0	1	2	5
Floxuridine	ZINC000003977743	Pyrimidine nucleosides	Pyrimidine 2-deoxyribonucleosides	799	-5.07	-6.33737	-6	5.07	6.33737	6	1.08084	0.489034	0.32	0.416	0.6	0.143	0.3015	4	0	2	0	0	2	0	0	2	246.194	0.4035	16	6	3	3	0	2	0	0.111111	18	2	0	65.274	28	1	0	0	0	0	1	2	5
Floxuridine	ZINC000003977743	Pyrimidine nucleosides	Pyrimidine 2-deoxyribonucleosides	800	-5.29	-6.12793	-5.8	5.29	6.12793	5.8	1.26718	0.759324	0.213	0.538	0.715	0.23	0.347	4	0	2	0	0	2	0	0	2	246.194	0.4035	16	6	3	3	0	2	0	0.111111	18	2	0	65.274	28	1	0	0	0	0	1	2	5
Nafimidone	ZINC000000001766	Naphthalenes	?	801	-5.43	-7.49449	-7.5	5.43	7.49449	7.5	1.00975	0.698433	0.165	0.036	0.031	0.11	0.104	13	2	2	0	0	1	0	0	3	236.274	4.6616	14	3	0	0	0	0	0	0.15	20	1	0	83.3945	30	0	0	0	0	0	0	2	1
Nafimidone	ZINC000000001766	Naphthalenes	?	802	-4.98	-7.49722	-7.5	4.98	7.49722	7.5	0.94626	0.667819	0.367	0.036	0.031	0.091	0.145	13	2	2	0	0	1	0	0	3	236.274	4.6616	14	3	0	0	0	0	0	0.15	20	1	0	83.3945	30	0	0	0	0	0	0	2	1
Nafimidone	ZINC000000001766	Naphthalenes	?	803	-4.91	-7.49288	-7.5	4.91	7.49288	7.5	0.949608	0.654379	0.409	0.037	0.031	0.092	0.156	13	2	2	0	0	1	0	0	3	236.274	4.6616	14	3	0	0	0	0	0	0.15	20	1	0	83.3945	30	0	0	0	0	0	0	2	1
Inaperisone	ZINC000002016043	Organooxygen compounds	Carbonyl compounds	804	-4.21	-6.25678	-6.3	4.21	6.25678	6.3	1.09188	0.727526	0.777	0.46	0.421	0.148	0.3735	10	6	1	0	0	1	0	0	2	245.366	7.9494	24	1	1	1	0	0	1	0.263158	19	1	0	99.0874	41	0	0	0	0	0	0	1	1
Inaperisone	ZINC000002016043	Organooxygen compounds	Carbonyl compounds	805	-4.49	-6.27315	-6.3	4.49	6.27315	6.3	1.23034	0.749222	0.638	0.451	0.421	0.214	0.37175	10	6	1	0	0	1	0	0	2	245.366	7.9494	24	1	1	1	0	0	1	0.263158	19	1	0	99.0874	41	0	0	0	0	0	0	1	1
Inaperisone	ZINC000002016043	Organooxygen compounds	Carbonyl compounds	806	-4.79	-6.26253	-6.3	4.79	6.26253	6.3	1.12801	0.782372	0.474	0.455	0.421	0.164	0.30575	10	6	1	0	0	1	0	0	2	245.366	7.9494	24	1	1	1	0	0	1	0.263158	19	1	0	99.0874	41	0	0	0	0	0	0	1	1
Glipalamide	ZINC000005781568	Benzene and substituted derivatives	Benzenesulfonamides	807	-5.26	-7.13676	-7.2	5.26	7.13676	7.2	1.58248	1.05063	0.225	0.096	0.08	0.376	0.26425	9	3	2	1	0	3	0	1	2	281.337	4.8436	21	6	1	1	0	1	1	0.15	20	1	0	85.0282	34	0	0	0	0	0	0	3	3
Glipalamide	ZINC000005781568	Benzene and substituted derivatives	Benzenesulfonamides	808	-5.28	-7.14844	-7.2	5.28	7.14844	7.2	1.80521	1.22126	0.217	0.094	0.08	0.473	0.31075	9	3	2	1	0	3	0	1	2	281.337	4.8436	21	6	1	1	0	1	1	0.15	20	1	0	85.0282	34	0	0	0	0	0	0	3	3
Glipalamide	ZINC000005781568	Benzene and substituted derivatives	Benzenesulfonamides	809	-5.25	-6.36927	-6.4	5.25	6.36927	6.4	1.67011	1.14274	0.228	0.396	0.362	0.414	0.3545	9	3	2	1	0	3	0	1	2	281.337	4.8436	21	6	1	1	0	1	1	0.15	20	1	0	85.0282	34	0	0	0	0	0	0	3	3
Sampirtine	ZINC000053277475	Pyridines and derivatives	Aminopyridines and derivatives	810	-5.75	-6.61008	-6.3	5.75	6.61008	6.3	3.05967	1.82247	0.083	0.272	0.421	0.948	0.6	11	1	1	2	0	0	0	0	2	217.247	5.2455	15	3	2	0	0	0	0	0.117647	17	1	0	74.7636	28	1	0	0	0	0	1	3	0
Sampirtine	ZINC000053277475	Pyridines and derivatives	Aminopyridines and derivatives	811	-4.97	-7.37821	-7	4.97	7.37821	7	2.7878	1.79888	0.372	0.055	0.129	0.872	0.56125	11	1	1	2	0	0	0	0	2	217.247	5.2455	15	3	2	0	0	0	0	0.117647	17	1	0	74.7636	28	1	0	0	0	0	1	3	0
Sampirtine	ZINC000053277475	Pyridines and derivatives	Aminopyridines and derivatives	812	-5.06	-6.99943	-6.7	5.06	6.99943	6.7	2.69643	1.70715	0.326	0.131	0.229	0.836	0.55675	11	1	1	2	0	0	0	0	2	217.247	5.2455	15	3	2	0	0	0	0	0.117647	17	1	0	74.7636	28	1	0	0	0	0	1	3	0
Dronabinol	ZINC000002039624	Benzopyrans	1-benzopyrans	813	-5.13	-6.92509	-6.8	5.13	6.92509	6.8	2.73738	1.57222	0.29	0.155	0.194	0.852	0.547	13	8	0	0	1	1	0	0	3	314.469	10.1179	32	2	1	1	0	0	0	0.16	25	1	0	129.957	53	0	0	0	0	0	0	0	2
Pentapiperide	ZINC000000155897	Benzene and substituted derivatives	Phenylpropanes	814	-3.69	-6.0331	-5.7	3.69	6.0331	5.7	1.99719	1.36989	0.936	0.59	0.763	0.562	0.70575	11	7	1	0	0	2	0	0	2	289.419	9.0512	29	2	1	1	0	0	1	0.272727	22	1	0	113.634	48	0	0	0	0	0	0	1	2
Pentapiperide	ZINC000000155897	Benzene and substituted derivatives	Phenylpropanes	815	-3.18	-5.76209	-5.5	3.18	5.76209	5.5	2.11136	1.44806	0.991	0.742	0.852	0.619	0.77025	11	7	1	0	0	2	0	0	2	289.419	9.0512	29	2	1	1	0	0	1	0.272727	22	1	0	113.634	48	0	0	0	0	0	0	1	2
Pentapiperide	ZINC000000155897	Benzene and substituted derivatives	Phenylpropanes	816	-3.95	-6.02096	-5.8	3.95	6.02096	5.8	3.22575	2.24439	0.874	0.6	0.715	0.973	0.88375	11	7	1	0	0	2	0	0	2	289.419	9.0512	29	2	1	1	0	0	1	0.272727	22	1	0	113.634	48	0	0	0	0	0	0	1	2
Mabuprofen	ZINC000001999469	Prenol lipids	Monoterpenoids	817	-5.4	-6.6564	-6.5	5.4	6.6564	6.5	1.30971	0.660135	0.176	0.255	0.313	0.249	0.24675	6	9	0	1	0	2	0	0	1	249.354	6.6429	26	3	2	2	0	1	0	0.388889	18	0	0	98.7412	41	0	0	0	0	0	0	1	2
Mabuprofen	ZINC000001999469	Prenol lipids	Monoterpenoids	818	-4.97	-6.36747	-6.2	4.97	6.36747	6.2	0.806079	0.317141	0.372	0.398	0.474	0.053	0.238	6	9	0	1	0	2	0	0	1	249.354	6.6429	26	3	2	2	0	1	0	0.388889	18	0	0	98.7412	41	0	0	0	0	0	0	1	2
Mabuprofen	ZINC000001999469	Prenol lipids	Monoterpenoids	819	-4.69	-6.66744	-6.5	4.69	6.66744	6.5	1.12682	0.747592	0.528	0.251	0.313	0.163	0.29175	6	9	0	1	0	2	0	0	1	249.354	6.6429	26	3	2	2	0	1	0	0.388889	18	0	0	98.7412	41	0	0	0	0	0	0	1	2
Sumanirole	ZINC000003960633	Quinolines and derivatives	Aminoquinolines and derivatives	820	-4.56	-6.25682	-6.3	4.56	6.25682	6.3	1.23381	0.858223	0.601	0.46	0.421	0.216	0.3635	10	1	2	1	0	1	0	0	3	203.245	4.017	14	2	2	1	0	0	1	0.0588235	17	2	0	73.8985	28	0	0	0	0	0	0	3	1
Sumanirole	ZINC000003960633	Quinolines and derivatives	Aminoquinolines and derivatives	821	-4.59	-6.56175	-6.5	4.59	6.56175	6.5	1.21602	0.829287	0.581	0.296	0.313	0.206	0.3265	10	1	2	1	0	1	0	0	3	203.245	4.017	14	2	2	1	0	0	1	0.0588235	17	2	0	73.8985	28	0	0	0	0	0	0	3	1
Sumanirole	ZINC000003960633	Quinolines and derivatives	Aminoquinolines and derivatives	822	-4.56	-6.25153	-6.3	4.56	6.25153	6.3	2.16086	1.51778	0.601	0.463	0.421	0.641	0.576	10	1	2	1	0	1	0	0	3	203.245	4.017	14	2	2	1	0	0	1	0.0588235	17	2	0	73.8985	28	0	0	0	0	0	0	3	1
Cypenamine	ZINC000002037168	Organonitrogen compounds	Amines	823	-3.51	-5.82638	-5.7	3.51	5.82638	5.7	1.24131	0.295345	0.965	0.712	0.763	0.218	0.541	11	0	0	1	0	0	0	0	2	161.248	5.7366	15	0	1	0	0	0	0	0.0769231	13	0	0	68.1535	27	0	0	0	0	0	0	1	0
Cypenamine	ZINC000002037168	Organonitrogen compounds	Amines	824	-3.49	-5.83205	-5.7	3.49	5.83205	5.7	1.53433	0.144035	0.969	0.709	0.763	0.356	0.611	11	0	0	1	0	0	0	0	2	161.248	5.7366	15	0	1	0	0	0	0	0.0769231	13	0	0	68.1535	27	0	0	0	0	0	0	1	0
Cypenamine	ZINC000002037168	Organonitrogen compounds	Amines	825	-3.58	-5.81209	-5.7	3.58	5.81209	5.7	0.848581	0.329743	0.956	0.72	0.763	0.064	0.46175	11	0	0	1	0	0	0	0	2	161.248	5.7366	15	0	1	0	0	0	0	0.0769231	13	0	0	68.1535	27	0	0	0	0	0	0	1	0
Cloquinozine	ZINC000000000172	Piperidines	Benzylpiperidines	826	-4.55	-6.84447	-6.9	4.55	6.84447	6.9	1.50736	0.49398	0.608	0.18	0.158	0.343	0.363	15	1	1	0	0	0	0	0	3	263.812	8.8821	22	0	1	1	0	0	1	0.1	20	2	0	100.346	40	1	0	0	1	0	0	1	0
Cloquinozine	ZINC000000000172	Piperidines	Benzylpiperidines	827	-4.31	-7.08423	-7.1	4.31	7.08423	7.1	0.904603	0.637766	0.734	0.107	0.101	0.078	0.24775	15	1	1	0	0	0	0	0	3	263.812	8.8821	22	0	1	1	0	0	1	0.1	20	2	0	100.346	40	1	0	0	1	0	0	1	0
Cloquinozine	ZINC000000000172	Piperidines	Benzylpiperidines	828	-4.63	-7.08687	-7.1	4.63	7.08687	7.1	0.703225	0.493881	0.556	0.106	0.101	0.036	0.18225	15	1	1	0	0	0	0	0	3	263.812	8.8821	22	0	1	1	0	0	1	0.1	20	2	0	100.346	40	1	0	0	1	0	0	1	0
Xenbucin	ZINC000002015169	Benzene and substituted derivatives	Biphenyls and derivatives	829	-3.36	-5.65755	-5.7	3.36	5.65755	5.7	1.8037	0.74909	0.982	0.792	0.763	0.473	0.67275	12	4	0	0	0	2	0	0	2	239.294	6.3117	16	2	0	1	1	0	0	0.210526	19	0	0	86.9495	33	0	0	0	0	0	0	0	2
Xenbucin	ZINC000002015169	Benzene and substituted derivatives	Biphenyls and derivatives	830	-3.78	-6.06416	-6.1	3.78	6.06416	6.1	1.86964	0.39976	0.917	0.574	0.538	0.502	0.61475	12	4	0	0	0	2	0	0	2	239.294	6.3117	16	2	0	1	1	0	0	0.210526	19	0	0	86.9495	33	0	0	0	0	0	0	0	2
Xenbucin	ZINC000002015169	Benzene and substituted derivatives	Biphenyls and derivatives	831	-3.46	-7.32635	-7.3	3.46	7.32635	7.3	1.41445	0.970653	0.972	0.061	0.061	0.302	0.40925	12	4	0	0	0	2	0	0	2	239.294	6.3117	16	2	0	1	1	0	0	0.210526	19	0	0	86.9495	33	0	0	0	0	0	0	0	2
Phenampromide	ZINC000000000604	Benzene and substituted derivatives	Anilides	832	-5.56	-5.34752	-5.4	5.56	5.34752	5.4	1.31149	0.237334	0.123	0.908	0.888	0.25	0.37775	11	6	1	1	0	1	0	0	2	274.408	8.5389	28	2	1	1	0	0	1	0.285714	21	1	0	111.119	46	0	0	0	0	0	0	2	1
Phenampromide	ZINC000000000604	Benzene and substituted derivatives	Anilides	833	-4.29	-5.50269	-5.4	4.29	5.50269	5.4	2.04771	1.4359	0.743	0.858	0.888	0.587	0.70125	11	6	1	1	0	1	0	0	2	274.408	8.5389	28	2	1	1	0	0	1	0.285714	21	1	0	111.119	46	0	0	0	0	0	0	2	1
Phenampromide	ZINC000000000604	Benzene and substituted derivatives	Anilides	834	-4.72	-5.37124	-5.4	4.72	5.37124	5.4	1.77283	1.15842	0.511	0.901	0.888	0.456	0.57775	11	6	1	1	0	1	0	0	2	274.408	8.5389	28	2	1	1	0	0	1	0.285714	21	1	0	111.119	46	0	0	0	0	0	0	2	1
Butidrine	ZINC000004212253	Tetralins	?	835	-5.58	-6.62978	-6.7	5.58	6.62978	6.7	1.64627	1.00303	0.117	0.266	0.229	0.401	0.287	10	6	0	1	0	1	0	0	2	247.382	7.9733	26	1	2	1	0	1	1	0.263158	19	0	0	104.765	43	0	0	0	0	0	0	1	1
Butidrine	ZINC000004212253	Tetralins	?	836	-5.5	-6.98367	-6.9	5.5	6.98367	6.9	1.9051	0.949535	0.144	0.137	0.158	0.524	0.3375	10	6	0	1	0	1	0	0	2	247.382	7.9733	26	1	2	1	0	1	1	0.263158	19	0	0	104.765	43	0	0	0	0	0	0	1	1
Butidrine	ZINC000004212253	Tetralins	?	837	-4.91	-7.12243	-6.7	4.91	7.12243	6.7	1.58205	1.00392	0.409	0.099	0.229	0.375	0.347	10	6	0	1	0	1	0	0	2	247.382	7.9733	26	1	2	1	0	1	1	0.263158	19	0	0	104.765	43	0	0	0	0	0	0	1	1
Ibuproxam	ZINC000005284667	Prenol lipids	Monoterpenoids	838	-4.96	-6.7183	-6.6	4.96	6.7183	6.6	0.782705	0.405536	0.378	0.23	0.268	0.047	0.185	6	7	0	1	0	2	0	0	1	221.3	6.1931	21	3	2	2	1	0	0	0.3125	16	0	0	84.0346	35	0	0	0	0	0	0	1	2
Ibuproxam	ZINC000005284667	Prenol lipids	Monoterpenoids	839	-4.87	-6.8093	-6.6	4.87	6.8093	6.6	0.868906	0.415097	0.429	0.196	0.268	0.07	0.20925	6	7	0	1	0	2	0	0	1	221.3	6.1931	21	3	2	2	1	0	0	0.3125	16	0	0	84.0346	35	0	0	0	0	0	0	1	2
Ibuproxam	ZINC000005284667	Prenol lipids	Monoterpenoids	840	-4.94	-6.77903	-6.6	4.94	6.77903	6.6	1.40488	0.238997	0.39	0.208	0.268	0.297	0.313	6	7	0	1	0	2	0	0	1	221.3	6.1931	21	3	2	2	1	0	0	0.3125	16	0	0	84.0346	35	0	0	0	0	0	0	1	2
Detomidine	ZINC000005116305	Benzene and substituted derivatives	Xylenes	841	-4.19	-5.89978	-5.9	4.19	5.89978	5.9	1.11977	0.771708	0.784	0.67	0.662	0.159	0.441	9	3	2	0	0	0	0	0	2	186.258	4.9575	15	1	1	1	0	0	0	0.133333	15	1	0	72.6764	28	0	0	0	0	0	0	2	0
Detomidine	ZINC000005116305	Benzene and substituted derivatives	Xylenes	842	-4.19	-5.9043	-5.9	4.19	5.9043	5.9	0.664905	0.430612	0.784	0.668	0.662	0.03	0.3765	9	3	2	0	0	0	0	0	2	186.258	4.9575	15	1	1	1	0	0	0	0.133333	15	1	0	72.6764	28	0	0	0	0	0	0	2	0
Detomidine	ZINC000005116305	Benzene and substituted derivatives	Xylenes	843	-4.36	-5.88457	-5.9	4.36	5.88457	5.9	0.712399	0.446171	0.707	0.68	0.662	0.037	0.36075	9	3	2	0	0	0	0	0	2	186.258	4.9575	15	1	1	1	0	0	0	0.133333	15	1	0	72.6764	28	0	0	0	0	0	0	2	0
Piraxelate	ZINC000033852272	Carboxylic acids and derivatives	Amino acids, peptides, and analogues	844	-4.19	-4.98757	-5.1	4.19	4.98757	5.1	1.31324	0.304081	0.784	0.966	0.952	0.252	0.56	10	5	1	0	0	3	0	0	2	267.369	7.4166	29	4	0	0	0	0	0	0.2	20	1	0	98.3172	44	0	0	0	0	0	0	1	3
Piraxelate	ZINC000033852272	Carboxylic acids and derivatives	Amino acids, peptides, and analogues	845	-4.78	-6.22911	-6.1	4.78	6.22911	6.1	1.02147	0.610879	0.478	0.475	0.538	0.116	0.312	10	5	1	0	0	3	0	0	2	267.369	7.4166	29	4	0	0	0	0	0	0.2	20	1	0	98.3172	44	0	0	0	0	0	0	1	3
Piraxelate	ZINC000033852272	Carboxylic acids and derivatives	Amino acids, peptides, and analogues	846	-4.18	-6.00478	-5.9	4.18	6.00478	5.9	1.01426	0.703761	0.789	0.606	0.662	0.113	0.41925	10	5	1	0	0	3	0	0	2	267.369	7.4166	29	4	0	0	0	0	0	0.2	20	1	0	98.3172	44	0	0	0	0	0	0	1	3
Azapetine	ZINC000001481977	Benzazepines	?	847	-4.62	-5.93277	-5.9	4.62	5.93277	5.9	1.13175	0.743945	0.564	0.649	0.662	0.165	0.389	14	3	1	0	0	0	0	0	3	235.33	6.8352	17	0	1	1	0	0	1	0.1	20	1	0	93.2509	35	0	0	0	0	0	0	1	0
Azapetine	ZINC000001481977	Benzazepines	?	848	-4.81	-6.73763	-6.7	4.81	6.73763	6.7	0.944522	0.597768	0.461	0.224	0.229	0.09	0.2175	14	3	1	0	0	0	0	0	3	235.33	6.8352	17	0	1	1	0	0	1	0.1	20	1	0	93.2509	35	0	0	0	0	0	0	1	0
Azapetine	ZINC000001481977	Benzazepines	?	849	-4.66	-6.7273	-6.7	4.66	6.7273	6.7	1.22758	0.803696	0.543	0.227	0.229	0.211	0.2985	14	3	1	0	0	0	0	0	3	235.33	6.8352	17	0	1	1	0	0	1	0.1	20	1	0	93.2509	35	0	0	0	0	0	0	1	0
Dextrofemine	ZINC000001842961	Benzene and substituted derivatives	Phenethylamines	850	-4.93	-7.27419	-7.2	4.93	7.27419	7.2	1.51384	0.988683	0.395	0.07	0.08	0.347	0.29225	12	6	0	1	0	1	0	0	2	269.388	8.6517	24	1	1	0	0	0	1	0.333333	21	0	0	109.732	43	0	0	0	0	0	0	1	1
Dextrofemine	ZINC000001842961	Benzene and substituted derivatives	Phenethylamines	851	-4.92	-7.27962	-7.3	4.92	7.27962	7.3	1.6312	0.428658	0.403	0.069	0.061	0.395	0.3135	12	6	0	1	0	1	0	0	2	269.388	8.6517	24	1	1	0	0	0	1	0.333333	21	0	0	109.732	43	0	0	0	0	0	0	1	1
Dextrofemine	ZINC000001842961	Benzene and substituted derivatives	Phenethylamines	852	-4.82	-6.59512	-6.7	4.82	6.59512	6.7	1.37207	0.138356	0.456	0.28	0.229	0.282	0.31225	12	6	0	1	0	1	0	0	2	269.388	8.6517	24	1	1	0	0	0	1	0.333333	21	0	0	109.732	43	0	0	0	0	0	0	1	1
Cloridarol	ZINC000000000176	Benzofurans	?	853	-5.37	-7.40575	-7.2	5.37	7.40575	7.2	2.12198	1.3267	0.184	0.048	0.08	0.624	0.378	14	1	0	0	1	1	0	0	3	258.704	5.2257	12	2	1	1	0	1	0	0.1	20	1	0	83.8038	29	1	0	0	1	0	0	0	2
Cloridarol	ZINC000000000176	Benzofurans	?	854	-5.38	-7.41468	-7.2	5.38	7.41468	7.2	2.07424	1.40577	0.182	0.045	0.08	0.602	0.3665	14	1	0	0	1	1	0	0	3	258.704	5.2257	12	2	1	1	0	1	0	0.1	20	1	0	83.8038	29	1	0	0	1	0	0	0	2
Cloridarol	ZINC000000000176	Benzofurans	?	855	-5.13	-7.41305	-7.2	5.13	7.41305	7.2	2.09243	1.19584	0.29	0.045	0.08	0.61	0.3975	14	1	0	0	1	1	0	0	3	258.704	5.2257	12	2	1	1	0	1	0	0.1	20	1	0	83.8038	29	1	0	0	1	0	0	0	2
Idropranolol	ZINC000000000383	Naphthalenes	?	856	-5.21	-6.86304	-6.6	5.21	6.86304	6.6	2.05246	0.7807	0.249	0.176	0.268	0.589	0.42375	10	6	0	1	0	2	0	0	2	261.365	7.459	25	2	2	1	0	1	1	0.3	20	0	0	104.495	42	0	0	0	0	0	0	1	2
Idropranolol	ZINC000000000383	Naphthalenes	?	857	-4.83	-6.92806	-6.8	4.83	6.92806	6.8	1.77437	1.16634	0.451	0.153	0.194	0.456	0.38925	10	6	0	1	0	2	0	0	2	261.365	7.459	25	2	2	1	0	1	1	0.3	20	0	0	104.495	42	0	0	0	0	0	0	1	2
Idropranolol	ZINC000000000383	Naphthalenes	?	858	-4.94	-6.99572	-6.8	4.94	6.99572	6.8	1.54933	0.955552	0.39	0.132	0.194	0.362	0.327	10	6	0	1	0	2	0	0	2	261.365	7.459	25	2	2	1	0	1	1	0.3	20	0	0	104.495	42	0	0	0	0	0	0	1	2
Fenfluramine	ZINC000000001612	Benzene and substituted derivatives	Phenethylamines	859	-4.39	-5.86348	-5.8	4.39	5.86348	5.8	2.94959	1.4063	0.692	0.693	0.715	0.917	0.81025	6	6	0	1	0	0	0	0	1	231.261	6.942	16	0	1	0	0	0	1	0.3125	16	0	0	76.5151	32	3	0	0	0	0	3	1	0
Fenfluramine	ZINC000000001612	Benzene and substituted derivatives	Phenethylamines	860	-3.92	-6.02399	-6	3.92	6.02399	6	2.89291	2.02335	0.883	0.597	0.6	0.903	0.82225	6	6	0	1	0	0	0	0	1	231.261	6.942	16	0	1	0	0	0	1	0.3125	16	0	0	76.5151	32	3	0	0	0	0	3	1	0
Fenfluramine	ZINC000000001612	Benzene and substituted derivatives	Phenethylamines	861	-3.69	-6.18266	-6.2	3.69	6.18266	6.2	2.97177	1.44128	0.936	0.505	0.474	0.924	0.8145	6	6	0	1	0	0	0	0	1	231.261	6.942	16	0	1	0	0	0	1	0.3125	16	0	0	76.5151	32	3	0	0	0	0	3	1	0
Tegafur	ZINC000000016956	Diazines	Pyrimidines and pyrimidine derivatives	862	-3.98	-5.14297	-5.2	3.98	5.14297	5.2	1.59019	1.07376	0.865	0.946	0.933	0.378	0.6385	8	0	2	0	1	2	0	0	2	200.169	1.8381	12	4	1	1	0	0	0	0.0666667	15	2	0	55.3534	23	1	0	0	0	0	1	2	3
Tegafur	ZINC000000016956	Diazines	Pyrimidines and pyrimidine derivatives	863	-4.33	-5.46037	-5.5	4.33	5.46037	5.5	1.51028	1.03967	0.724	0.87	0.852	0.345	0.5665	8	0	2	0	1	2	0	0	2	200.169	1.8381	12	4	1	1	0	0	0	0.0666667	15	2	0	55.3534	23	1	0	0	0	0	1	2	3
Tegafur	ZINC000000016956	Diazines	Pyrimidines and pyrimidine derivatives	864	-4.49	-5.52654	-5.5	4.49	5.52654	5.5	1.24829	0.871757	0.638	0.847	0.852	0.222	0.4835	8	0	2	0	1	2	0	0	2	200.169	1.8381	12	4	1	1	0	0	0	0.0666667	15	2	0	55.3534	23	1	0	0	0	0	1	2	3
Ethotoin	ZINC000000897291	Azolidines	Imidazolidines	865	-4.68	-5.9135	-5.9	4.68	5.9135	5.9	1.06094	0.718577	0.533	0.664	0.662	0.133	0.36525	9	2	2	0	0	2	0	0	2	204.229	3.7178	16	4	1	1	0	0	0	0.125	16	1	0	63.1588	27	0	0	0	0	0	0	2	2
Ethotoin	ZINC000000897291	Azolidines	Imidazolidines	866	-4.67	-5.94568	-5.9	4.67	5.94568	5.9	1.00508	0.658745	0.538	0.641	0.662	0.109	0.3545	9	2	2	0	0	2	0	0	2	204.229	3.7178	16	4	1	1	0	0	0	0.125	16	1	0	63.1588	27	0	0	0	0	0	0	2	2
Ethotoin	ZINC000000897291	Azolidines	Imidazolidines	867	-4.82	-5.53668	-5.5	4.82	5.53668	5.5	1.58559	1.11536	0.456	0.844	0.852	0.377	0.5155	9	2	2	0	0	2	0	0	2	204.229	3.7178	16	4	1	1	0	0	0	0.125	16	1	0	63.1588	27	0	0	0	0	0	0	2	2
Demelverine	ZINC000008462709	Benzene and substituted derivatives	Phenethylamines	868	-4.87	-6.51378	-6.5	4.87	6.51378	6.5	1.19007	0.189719	0.429	0.32	0.313	0.193	0.282	12	5	0	1	0	0	0	0	2	239.362	7.7743	21	0	1	1	0	0	1	0.315789	19	0	0	101.474	39	0	0	0	0	0	0	1	0
Demelverine	ZINC000008462709	Benzene and substituted derivatives	Phenethylamines	869	-5.42	-7.00007	-7	5.42	7.00007	7	1.14257	0.195138	0.169	0.13	0.129	0.171	0.16	12	5	0	1	0	0	0	0	2	239.362	7.7743	21	0	1	1	0	0	1	0.315789	19	0	0	101.474	39	0	0	0	0	0	0	1	0
Demelverine	ZINC000008462709	Benzene and substituted derivatives	Phenethylamines	870	-5.3	-6.93522	-6.9	5.3	6.93522	6.9	1.39571	0.219708	0.208	0.15	0.158	0.293	0.238	12	5	0	1	0	0	0	0	2	239.362	7.7743	21	0	1	1	0	0	1	0.315789	19	0	0	101.474	39	0	0	0	0	0	0	1	0
Besipirdine	ZINC000000004896	Indoles and derivatives	Indoles	871	-4.42	-5.63656	-5.6	4.42	5.63656	5.6	2.23668	1.54375	0.677	0.804	0.81	0.671	0.70725	13	3	2	1	0	0	0	0	3	251.333	6.3667	19	2	0	0	0	0	0	0.190476	21	2	0	97.499	36	0	0	0	0	0	0	3	0
Besipirdine	ZINC000000004896	Indoles and derivatives	Indoles	872	-4.75	-5.35598	-5.4	4.75	5.35598	5.4	2.37205	1.66444	0.495	0.905	0.888	0.719	0.70525	13	3	2	1	0	0	0	0	3	251.333	6.3667	19	2	0	0	0	0	0	0.190476	21	2	0	97.499	36	0	0	0	0	0	0	3	0
Besipirdine	ZINC000000004896	Indoles and derivatives	Indoles	873	-4.54	-5.61279	-5.6	4.54	5.61279	5.6	1.77558	1.23131	0.614	0.815	0.81	0.458	0.585	13	3	2	1	0	0	0	0	3	251.333	6.3667	19	2	0	0	0	0	0	0.190476	21	2	0	97.499	36	0	0	0	0	0	0	3	0
Levofacetoperane	ZINC000032228596	Benzene and substituted derivatives	Benzyloxycarbonyls	874	-4.62	-5.50432	-5.9	4.62	5.50432	5.9	2.41114	1.64074	0.564	0.857	0.662	0.735	0.674	11	3	1	0	0	2	0	0	2	233.311	6.4064	21	2	1	0	0	0	1	0.222222	18	1	0	85.7613	36	0	0	0	0	0	0	1	2
Levofacetoperane	ZINC000032228596	Benzene and substituted derivatives	Benzyloxycarbonyls	875	-4.31	-6.2781	-6.3	4.31	6.2781	6.3	2.3296	1.63799	0.734	0.449	0.421	0.704	0.64075	11	3	1	0	0	2	0	0	2	233.311	6.4064	21	2	1	0	0	0	1	0.222222	18	1	0	85.7613	36	0	0	0	0	0	0	1	2
Levofacetoperane	ZINC000032228596	Benzene and substituted derivatives	Benzyloxycarbonyls	876	-3.86	-5.65135	-5.7	3.86	5.65135	5.7	2.35931	1.60541	0.9	0.796	0.763	0.716	0.77375	11	3	1	0	0	2	0	0	2	233.311	6.4064	21	2	1	0	0	0	1	0.222222	18	1	0	85.7613	36	0	0	0	0	0	0	1	2
Dimefadane	ZINC000002037189	Indanes	?	877	-4.01	-6.53647	-6.5	4.01	6.53647	6.5	1.6958	1.19087	0.856	0.307	0.313	0.425	0.50475	15	2	0	1	0	0	0	0	3	237.346	7.2602	19	0	1	1	0	0	1	0.1	20	0	0	97.4047	37	0	0	0	0	0	0	1	0
Dimefadane	ZINC000002037189	Indanes	?	878	-4.34	-6.53263	-6.6	4.34	6.53263	6.6	1.29027	0.885082	0.719	0.309	0.268	0.242	0.36775	15	2	0	1	0	0	0	0	3	237.346	7.2602	19	0	1	1	0	0	1	0.1	20	0	0	97.4047	37	0	0	0	0	0	0	1	0
Dimefadane	ZINC000002037189	Indanes	?	879	-3.95	-6.02213	-6	3.95	6.02213	6	1.19574	0.840013	0.874	0.599	0.6	0.197	0.467	15	2	0	1	0	0	0	0	3	237.346	7.2602	19	0	1	1	0	0	1	0.1	20	0	0	97.4047	37	0	0	0	0	0	0	1	0
Meseclazone	ZINC000005573063	Benzoxazines	?	880	-4.13	-6.25642	-6.3	4.13	6.25642	6.3	0.732921	0.471739	0.812	0.46	0.421	0.039	0.32775	10	1	1	0	2	1	0	0	3	239.658	4.3736	14	4	0	0	0	0	0	0	18	2	0	65.8557	26	1	0	0	1	0	0	1	3
Meseclazone	ZINC000005573063	Benzoxazines	?	881	-4.22	-6.38779	-6.4	4.22	6.38779	6.4	0.894873	0.628016	0.772	0.386	0.362	0.076	0.3215	10	1	1	0	2	1	0	0	3	239.658	4.3736	14	4	0	0	0	0	0	0	18	2	0	65.8557	26	1	0	0	1	0	0	1	3
Meseclazone	ZINC000005573063	Benzoxazines	?	882	-4.23	-6.66061	-6.7	4.23	6.66061	6.7	1.86902	1.31554	0.768	0.254	0.229	0.501	0.49975	10	1	1	0	2	1	0	0	3	239.658	4.3736	14	4	0	0	0	0	0	0	18	2	0	65.8557	26	1	0	0	1	0	0	1	3
Amfepentorex	ZINC000001842983	Benzene and substituted derivatives	Phenethylamines	883	-4.49	-5.96851	-6	4.49	5.96851	6	0.69272	0.425531	0.638	0.626	0.6	0.033	0.326	6	9	0	1	0	0	0	0	1	219.372	8.8513	25	0	1	0	0	0	1	0.4375	16	0	0	100.413	41	0	0	0	0	0	0	1	0
Amfepentorex	ZINC000001842983	Benzene and substituted derivatives	Phenethylamines	884	-4.62	-6.10531	-5.9	4.62	6.10531	5.9	0.997222	0.613138	0.564	0.551	0.662	0.106	0.3595	6	9	0	1	0	0	0	0	1	219.372	8.8513	25	0	1	0	0	0	1	0.4375	16	0	0	100.413	41	0	0	0	0	0	0	1	0
Amfepentorex	ZINC000001842983	Benzene and substituted derivatives	Phenethylamines	885	-4.38	-6.08186	-6.1	4.38	6.08186	6.1	2.39771	0.898677	0.698	0.564	0.538	0.731	0.6745	6	9	0	1	0	0	0	0	1	219.372	8.8513	25	0	1	0	0	0	1	0.4375	16	0	0	100.413	41	0	0	0	0	0	0	1	0
Cyclexanone	ZINC000038600699	Oxazinanes	Morpholines	886	-4.68	-5.25134	-5.2	4.68	5.25134	5.2	2.5137	1.7135	0.533	0.924	0.933	0.773	0.753	14	2	1	0	1	1	0	0	3	263.381	8.1577	27	2	1	1	0	0	1	0.190476	21	1	0	101.299	44	0	0	0	0	0	0	1	2
Cyclexanone	ZINC000038600699	Oxazinanes	Morpholines	887	-3.67	-5.7295	-5.9	3.67	5.7295	5.9	2.53521	1.78841	0.94	0.759	0.662	0.778	0.7895	14	2	1	0	1	1	0	0	3	263.381	8.1577	27	2	1	1	0	0	1	0.190476	21	1	0	101.299	44	0	0	0	0	0	0	1	2
Cyclexanone	ZINC000038600699	Oxazinanes	Morpholines	888	-3.74	-4.76887	-4.8	3.74	4.76887	4.8	2.28205	1.59544	0.927	0.982	0.979	0.688	0.8205	14	2	1	0	1	1	0	0	3	263.381	8.1577	27	2	1	1	0	0	1	0.190476	21	1	0	101.299	44	0	0	0	0	0	0	1	2
Berefrine	ZINC000013901022	Phenols	1-hydroxy-4-unsubstituted benzenoids	889	-4.23	-6.23893	-6.1	4.23	6.23893	6.1	0.828061	0.51092	0.768	0.467	0.538	0.06	0.3565	9	5	1	0	1	1	0	0	2	235.327	6.3316	23	2	2	2	0	0	1	0.111111	18	1	0	89.9649	38	0	0	0	0	0	0	1	2
Berefrine	ZINC000013901022	Phenols	1-hydroxy-4-unsubstituted benzenoids	890	-3.55	-5.96449	-5.7	3.55	5.96449	5.7	1.2029	0.562376	0.96	0.628	0.763	0.201	0.53125	9	5	1	0	1	1	0	0	2	235.327	6.3316	23	2	2	2	0	0	1	0.111111	18	1	0	89.9649	38	0	0	0	0	0	0	1	2
Berefrine	ZINC000013901022	Phenols	1-hydroxy-4-unsubstituted benzenoids	891	-4.11	-6.68423	-6.5	4.11	6.68423	6.5	1.48524	0.761683	0.821	0.243	0.313	0.336	0.4515	9	5	1	0	1	1	0	0	2	235.327	6.3316	23	2	2	2	0	0	1	0.111111	18	1	0	89.9649	38	0	0	0	0	0	0	1	2
Piraxelate	ZINC000033852272	Carboxylic acids and derivatives	Amino acids, peptides, and analogues	892	-3.86	-6.37515	-6.4	3.86	6.37515	6.4	1.39203	0.96551	0.9	0.393	0.362	0.292	0.4615	10	5	1	0	0	3	0	0	2	267.369	7.4166	29	4	0	0	0	0	0	0.2	20	1	0	98.3172	44	0	0	0	0	0	0	1	3
Piraxelate	ZINC000033852272	Carboxylic acids and derivatives	Amino acids, peptides, and analogues	893	-4.57	-5.68502	-5.7	4.57	5.68502	5.7	0.896844	0.468382	0.595	0.777	0.763	0.076	0.3775	10	5	1	0	0	3	0	0	2	267.369	7.4166	29	4	0	0	0	0	0	0.2	20	1	0	98.3172	44	0	0	0	0	0	0	1	3
Piraxelate	ZINC000033852272	Carboxylic acids and derivatives	Amino acids, peptides, and analogues	894	-4.14	-6.11824	-6.1	4.14	6.11824	6.1	1.13499	0.769456	0.806	0.543	0.538	0.167	0.4195	10	5	1	0	0	3	0	0	2	267.369	7.4166	29	4	0	0	0	0	0	0.2	20	1	0	98.3172	44	0	0	0	0	0	0	1	3
Esflurbiprofen	ZINC000000008667	Benzene and substituted derivatives	Biphenyls and derivatives	895	-4.12	-7.20365	-7.2	4.12	7.20365	7.2	1.16718	0.786917	0.816	0.085	0.08	0.183	0.3155	12	3	0	0	0	2	0	0	2	243.257	5.621	13	2	0	1	1	0	0	0.157895	19	0	0	78.9295	30	1	0	0	0	0	1	0	2
Esflurbiprofen	ZINC000000008667	Benzene and substituted derivatives	Biphenyls and derivatives	896	-3.83	-6.72964	-6.8	3.83	6.72964	6.8	1.05714	0.228113	0.906	0.226	0.194	0.131	0.3405	12	3	0	0	0	2	0	0	2	243.257	5.621	13	2	0	1	1	0	0	0.157895	19	0	0	78.9295	30	1	0	0	0	0	1	0	2
Esflurbiprofen	ZINC000000008667	Benzene and substituted derivatives	Biphenyls and derivatives	897	-3.89	-6.38747	-6.4	3.89	6.38747	6.4	0.584019	0.259314	0.891	0.387	0.362	0.02	0.32325	12	3	0	0	0	2	0	0	2	243.257	5.621	13	2	0	1	1	0	0	0.157895	19	0	0	78.9295	30	1	0	0	0	0	1	0	2
Budralazine	ZINC000011616689	Diazanaphthalenes	Benzodiazines	898	-4.68	-6.47269	-6.4	4.68	6.47269	6.4	1.14054	0.752247	0.533	0.343	0.362	0.171	0.30925	8	6	2	2	0	0	0	0	2	240.31	5.7281	20	4	1	1	0	0	0	0.157895	19	1	0	92.9074	34	0	0	0	0	0	0	4	0
Budralazine	ZINC000011616689	Diazanaphthalenes	Benzodiazines	899	-5.5	-6.45396	-6.5	5.5	6.45396	6.5	0.305093	0.194738	0.144	0.351	0.313	0.002	0.11525	8	6	2	2	0	0	0	0	2	240.31	5.7281	20	4	1	1	0	0	0	0.157895	19	1	0	92.9074	34	0	0	0	0	0	0	4	0
Budralazine	ZINC000011616689	Diazanaphthalenes	Benzodiazines	900	-5.53	-6.46071	-6.5	5.53	6.46071	6.5	0.322313	0.209487	0.134	0.348	0.313	0.002	0.11275	8	6	2	2	0	0	0	0	2	240.31	5.7281	20	4	1	1	0	0	0	0.157895	19	1	0	92.9074	34	0	0	0	0	0	0	4	0
Picilorex	ZINC000031519739	Pyrrolidines	Phenylpyrrolidines	901	-3.74	-5.46107	-5.5	3.74	5.46107	5.5	1.07623	0.672648	0.927	0.87	0.852	0.141	0.51525	13	1	1	0	0	0	0	0	3	235.758	7.6509	18	0	1	0	0	0	1	0.111111	18	1	0	86.3153	34	1	0	0	1	0	0	1	0
Picilorex	ZINC000031519739	Pyrrolidines	Phenylpyrrolidines	902	-4.39	-5.97401	-6	4.39	5.97401	6	1.01181	0.689018	0.692	0.624	0.6	0.112	0.379	13	1	1	0	0	0	0	0	3	235.758	7.6509	18	0	1	0	0	0	1	0.111111	18	1	0	86.3153	34	1	0	0	1	0	0	1	0
Picilorex	ZINC000031519739	Pyrrolidines	Phenylpyrrolidines	903	-4.07	-6.3455	-6.4	4.07	6.3455	6.4	1.52223	1.06843	0.832	0.411	0.362	0.351	0.474	13	1	1	0	0	0	0	0	3	235.758	7.6509	18	0	1	0	0	0	1	0.111111	18	1	0	86.3153	34	1	0	0	1	0	0	1	0
Dezocine	ZINC000003830683	Tetralins	?	904	-4.23	-6.9286	-6.5	4.23	6.9286	6.5	2.72682	1.4422	0.768	0.153	0.313	0.847	0.69375	15	1	0	1	0	1	0	0	3	245.366	7.6297	24	1	2	1	0	0	0	0	20	0	0	100.933	41	0	0	0	0	0	0	1	1
Dezocine	ZINC000003830683	Tetralins	?	905	-4.74	-6.57218	-6.1	4.74	6.57218	6.1	3.99779	2.53656	0.499	0.29	0.538	0.999	0.75875	15	1	0	1	0	1	0	0	3	245.366	7.6297	24	1	2	1	0	0	0	0	20	0	0	100.933	41	0	0	0	0	0	0	1	1
Propenzolate	ZINC000004214202	Piperidines	?	906	-4.3	-6.37063	-6.3	4.3	6.37063	6.3	2.85765	1.78237	0.738	0.396	0.421	0.895	0.73725	16	4	1	0	0	3	0	0	3	331.456	8.5906	32	3	2	2	0	1	1	0.192308	26	1	0	124.631	53	0	0	0	0	0	0	1	3
Propenzolate	ZINC000004214202	Piperidines	?	907	-5.21	-6.43503	-6.3	5.21	6.43503	6.3	3.24286	1.59116	0.249	0.363	0.421	0.975	0.655	16	4	1	0	0	3	0	0	3	331.456	8.5906	32	3	2	2	0	1	1	0.192308	26	1	0	124.631	53	0	0	0	0	0	0	1	3
Propenzolate	ZINC000004214202	Piperidines	?	908	-5.57	-6.02948	-5.9	5.57	6.02948	5.9	2.75509	1.78996	0.12	0.593	0.662	0.861	0.626	16	4	1	0	0	3	0	0	3	331.456	8.5906	32	3	2	2	0	1	1	0.192308	26	1	0	124.631	53	0	0	0	0	0	0	1	3
Sinitrodil	ZINC000003777871	Benzoxazines	?	909	-5.21	-5.70148	-5.7	5.21	5.70148	5.7	1.36363	0.451057	0.249	0.771	0.763	0.277	0.3915	8	2	1	1	1	4	0	0	2	238.199	3.1098	15	3	0	0	0	0	0	0.222222	18	1	0	64.0901	27	0	0	0	0	0	0	2	5
Sinitrodil	ZINC000003777871	Benzoxazines	?	910	-4.94	-5.6311	-5.6	4.94	5.6311	5.6	0.840485	0.122283	0.39	0.807	0.81	0.062	0.331	8	2	1	1	1	4	0	0	2	238.199	3.1098	15	3	0	0	0	0	0	0.222222	18	1	0	64.0901	27	0	0	0	0	0	0	2	5
Sinitrodil	ZINC000003777871	Benzoxazines	?	911	-5.26	-6.11403	-6.1	5.26	6.11403	6.1	1.88767	0.823462	0.225	0.545	0.538	0.513	0.44725	8	2	1	1	1	4	0	0	2	238.199	3.1098	15	3	0	0	0	0	0	0.222222	18	1	0	64.0901	27	0	0	0	0	0	0	2	5
Orphenadrine	ZINC000000155269	Benzene and substituted derivatives	Diphenylmethanes	912	-4.59	-6.18954	-6	4.59	6.18954	6	1.83402	1.196	0.581	0.5	0.6	0.485	0.53775	12	6	0	1	0	1	0	0	2	269.388	8.3906	24	1	1	1	0	0	1	0.285714	21	0	0	109.639	43	0	0	0	0	0	0	1	1
Orphenadrine	ZINC000000155269	Benzene and substituted derivatives	Diphenylmethanes	913	-4.68	-5.68022	-5.7	4.68	5.68022	5.7	1.71468	1.16218	0.533	0.779	0.763	0.435	0.5415	12	6	0	1	0	1	0	0	2	269.388	8.3906	24	1	1	1	0	0	1	0.285714	21	0	0	109.639	43	0	0	0	0	0	0	1	1
Orphenadrine	ZINC000000155269	Benzene and substituted derivatives	Diphenylmethanes	914	-4.84	-5.86644	-5.8	4.84	5.86644	5.8	1.82939	0.95006	0.446	0.691	0.715	0.483	0.53175	12	6	0	1	0	1	0	0	2	269.388	8.3906	24	1	1	1	0	0	1	0.285714	21	0	0	109.639	43	0	0	0	0	0	0	1	1
Suprofen	ZINC000000057503	Organooxygen compounds	Carbonyl compounds	915	-4.26	-6.77617	-6.7	4.26	6.77617	6.7	1.20882	0.360462	0.756	0.21	0.229	0.203	0.34775	10	4	0	0	0	3	0	1	2	259.306	4.9844	13	4	0	1	1	0	0	0.210526	19	1	0	80.23	29	0	0	0	0	0	0	0	3
Suprofen	ZINC000000057503	Organooxygen compounds	Carbonyl compounds	916	-5.35	-6.10428	-5.8	5.35	6.10428	5.8	2.68319	1.19663	0.191	0.552	0.715	0.833	0.643	10	4	0	0	0	3	0	1	2	259.306	4.9844	13	4	0	1	1	0	0	0.210526	19	1	0	80.23	29	0	0	0	0	0	0	0	3
Suprofen	ZINC000000057503	Organooxygen compounds	Carbonyl compounds	917	-4.53	-6.13152	-6.1	4.53	6.13152	6.1	2.72708	0.986728	0.62	0.536	0.538	0.847	0.713	10	4	0	0	0	3	0	1	2	259.306	4.9844	13	4	0	1	1	0	0	0.210526	19	1	0	80.23	29	0	0	0	0	0	0	0	3
Furegrelate	ZINC000000001495	Benzofurans	?	918	-5.16	-6.91024	-6.9	5.16	6.91024	6.9	3.35862	2.32191	0.277	0.159	0.158	0.983	0.60025	13	2	1	0	1	2	0	0	3	252.249	4.9112	12	4	0	1	1	0	0	0.142857	21	2	0	79.049	29	0	0	0	0	0	0	1	3
Furegrelate	ZINC000000001495	Benzofurans	?	919	-4.84	-6.90598	-6.9	4.84	6.90598	6.9	3.25273	2.13581	0.446	0.16	0.158	0.976	0.639	13	2	1	0	1	2	0	0	3	252.249	4.9112	12	4	0	1	1	0	0	0.142857	21	2	0	79.049	29	0	0	0	0	0	0	1	3
Furegrelate	ZINC000000001495	Benzofurans	?	920	-5.07	-6.67073	-6.7	5.07	6.67073	6.7	3.12307	1.96369	0.32	0.25	0.229	0.959	0.61675	13	2	1	0	1	2	0	0	3	252.249	4.9112	12	4	0	1	1	0	0	0.142857	21	2	0	79.049	29	0	0	0	0	0	0	1	3
Metomidate	ZINC000000000496	Azoles	Imidazoles	921	-4.57	-6.47386	-6.5	4.57	6.47386	6.5	0.988512	0.625898	0.595	0.342	0.313	0.103	0.2785	9	4	2	0	0	2	0	0	2	230.267	4.5855	17	4	0	0	0	0	0	0.222222	18	1	0	78.8605	31	0	0	0	0	0	0	2	2
Metomidate	ZINC000000000496	Azoles	Imidazoles	922	-4.15	-6.64657	-6.7	4.15	6.64657	6.7	2.37327	1.6593	0.803	0.262	0.229	0.72	0.618	9	4	2	0	0	2	0	0	2	230.267	4.5855	17	4	0	0	0	0	0	0.222222	18	1	0	78.8605	31	0	0	0	0	0	0	2	2
Metomidate	ZINC000000000496	?	?	923	-4.42	-6.65601	-6.6	4.42	6.65601	6.6	2.80464	1.96977	0.677	0.256	0.268	0.877	0.67475	9	4	2	0	0	2	0	0	2	230.267	4.5855	17	4	0	0	0	0	0	0.222222	18	1	0	78.8605	31	0	0	0	0	0	0	2	2
Zileuton	ZINC000000000850	Benzothiophenes	1-benzothiophenes	924	-5.24	-6.55372	-6.6	5.24	6.55372	6.6	1.06732	0.390216	0.233	0.299	0.268	0.137	0.19375	8	3	0	2	0	2	0	1	2	236.296	5.3483	15	5	2	1	1	0	0	0.176471	17	1	0	75.728	28	0	0	0	0	0	0	2	2
Zileuton	ZINC000000000850	Benzothiophenes	1-benzothiophenes	925	-5.01	-5.72455	-5.6	5.01	5.72455	5.6	1.49398	1.04417	0.352	0.762	0.81	0.338	0.4595	8	3	0	2	0	2	0	1	2	236.296	5.3483	15	5	2	1	1	0	0	0.176471	17	1	0	75.728	28	0	0	0	0	0	0	2	2
Zileuton	ZINC000000000850	Benzothiophenes	1-benzothiophenes	926	-4.95	-5.73445	-5.6	4.95	5.73445	5.6	1.17012	0.580184	0.384	0.755	0.81	0.184	0.3905	8	3	0	2	0	2	0	1	2	236.296	5.3483	15	5	2	1	1	0	0	0.176471	17	1	0	75.728	28	0	0	0	0	0	0	2	2
Metaxalone	ZINC000000000471	Phenol ethers	?	927	-4.57	-5.94418	-5.9	4.57	5.94418	5.9	1.20375	0.798992	0.595	0.642	0.662	0.201	0.41475	9	3	1	0	1	2	0	0	2	221.256	5.5727	19	4	1	1	0	0	0	0.176471	17	1	0	73.1896	31	0	0	0	0	0	0	1	3
Metaxalone	ZINC000000000471	Phenol ethers	?	928	-4.49	-5.96236	-5.9	4.49	5.96236	5.9	1.29941	0.63706	0.638	0.63	0.662	0.245	0.4475	9	3	1	0	1	2	0	0	2	221.256	5.5727	19	4	1	1	0	0	0	0.176471	17	1	0	73.1896	31	0	0	0	0	0	0	1	3
Metaxalone	ZINC000000000471	Phenol ethers	?	929	-4.27	-6.48845	-6.5	4.27	6.48845	6.5	1.07878	0.70736	0.751	0.333	0.313	0.142	0.337	9	3	1	0	1	2	0	0	2	221.256	5.5727	19	4	1	1	0	0	0	0.176471	17	1	0	73.1896	31	0	0	0	0	0	0	1	3
Mepiperphenidol	ZINC000001748000	Benzene and substituted derivatives	Phenylbutylamines	930	-3.52	-6.39725	-6.2	3.52	6.39725	6.2	1.98093	1.14518	0.964	0.383	0.474	0.554	0.6365	11	8	1	0	0	1	0	0	2	290.471	10.1394	33	1	1	1	0	1	1	0.272727	22	1	0	124.035	53	0	0	0	0	0	0	1	1
Mepiperphenidol	ZINC000001748000	Benzene and substituted derivatives	Phenylbutylamines	931	-4.69	-6.36283	-6.2	4.69	6.36283	6.2	2.03042	1.16976	0.528	0.402	0.474	0.578	0.5395	11	8	1	0	0	1	0	0	2	290.471	10.1394	33	1	1	1	0	1	1	0.272727	22	1	0	124.035	53	0	0	0	0	0	0	1	1
Mepiperphenidol	ZINC000001748000	Benzene and substituted derivatives	Phenylbutylamines	932	-3.95	-6.36417	-6.2	3.95	6.36417	6.2	1.8519	1.17397	0.874	0.401	0.474	0.494	0.584	11	8	1	0	0	1	0	0	2	290.471	10.1394	33	1	1	1	0	1	1	0.272727	22	1	0	124.035	53	0	0	0	0	0	0	1	1
Dacopafant	ZINC000003799334	Pyrroles	Pyrrole carboxylic acids and derivatives	933	-5.01	-5.43736	-5.4	5.01	5.43736	5.4	1.65781	1.13982	0.352	0.879	0.888	0.406	0.513	11	1	2	1	0	1	0	1	3	245.307	4.3733	15	5	1	0	0	0	0	0.105263	19	3	0	77.9523	28	0	0	0	0	0	0	3	1
Dacopafant	ZINC000003799334	Pyrroles	Pyrrole carboxylic acids and derivatives	934	-5.37	-5.61053	-5.6	5.37	5.61053	5.6	1.24418	0.867635	0.184	0.817	0.81	0.22	0.3585	11	1	2	1	0	1	0	1	3	245.307	4.3733	15	5	1	0	0	0	0	0.105263	19	3	0	77.9523	28	0	0	0	0	0	0	3	1
Nifluridide	ZINC000003809180	Benzene and substituted derivatives	Trifluoromethylbenzenes	935	-5.99	-7.50134	-7.4	5.99	7.50134	7.4	2.8894	1.57135	0.048	0.035	0.045	0.901	0.47375	6	4	0	3	0	3	0	0	1	349.162	5.1204	10	3	2	1	0	0	0	0.26087	23	0	0	67.9236	29	7	0	0	0	0	7	3	3
Nifluridide	ZINC000003809180	Benzene and substituted derivatives	Trifluoromethylbenzenes	936	-5.76	-8.04135	-7.8	5.76	8.04135	7.8	1.80164	1.09466	0.081	0.005	0.012	0.472	0.25925	6	4	0	3	0	3	0	0	1	349.162	5.1204	10	3	2	1	0	0	0	0.26087	23	0	0	67.9236	29	7	0	0	0	0	7	3	3
Nifluridide	ZINC000003809180	Benzene and substituted derivatives	Trifluoromethylbenzenes	937	-6.58	-8.05208	-7.8	6.58	8.05208	7.8	2.494	1.62773	0.008	0.005	0.012	0.765	0.3875	6	4	0	3	0	3	0	0	1	349.162	5.1204	10	3	2	1	0	0	0	0.26087	23	0	0	67.9236	29	7	0	0	0	0	7	3	3
Meradimate	ZINC000003999653	Prenol lipids	Monoterpenoids	938	-5.04	-6.82538	-6.7	5.04	6.82538	6.7	0.901232	0.358265	0.336	0.189	0.229	0.078	0.18025	12	5	0	1	0	2	0	0	2	275.392	9.2135	28	3	1	0	0	0	0	0.190476	21	0	0	109.511	45	0	0	0	0	0	0	1	2
Meradimate	ZINC000003999653	Prenol lipids	Monoterpenoids	939	-5.15	-6.84862	-6.7	5.15	6.84862	6.7	0.934284	0.429531	0.281	0.179	0.229	0.086	0.1705	12	5	0	1	0	2	0	0	2	275.392	9.2135	28	3	1	0	0	0	0	0.190476	21	0	0	109.511	45	0	0	0	0	0	0	1	2
Meradimate	ZINC000003999653	Prenol lipids	Monoterpenoids	940	-5.12	-6.79637	-6.6	5.12	6.79637	6.6	1.38621	0.831946	0.295	0.201	0.268	0.289	0.28525	12	5	0	1	0	2	0	0	2	275.392	9.2135	28	3	1	0	0	0	0	0.190476	21	0	0	109.511	45	0	0	0	0	0	0	1	2
Cinnofuradione	ZINC000000000152	?	?	941	-5.25	-7.17309	-7.2	5.25	7.17309	7.2	2.33101	1.63702	0.228	0.09	0.08	0.704	0.429	19	1	2	0	1	2	0	0	4	334.375	6.7562	23	5	0	0	0	0	0	0.0689655	29	3	0	107.289	43	0	0	0	0	0	0	2	3
Cyclazodone	ZINC000000000190	Benzene and substituted derivatives	?	942	-4.73	-6.15521	-6.2	4.73	6.15521	6.2	1.07559	0.748638	0.505	0.522	0.474	0.141	0.31525	12	0	1	1	1	1	0	0	3	216.24	3.443	16	4	1	1	0	0	1	0.166667	18	1	0	68.7676	28	0	0	0	0	0	0	2	2
Cyclazodone	ZINC000000000190	Benzene and substituted derivatives	?	943	-4.91	-6.35335	-6.2	4.91	6.35335	6.2	1.17088	0.648217	0.409	0.406	0.474	0.184	0.31275	12	0	1	1	1	1	0	0	3	216.24	3.443	16	4	1	1	0	0	1	0.166667	18	1	0	68.7676	28	0	0	0	0	0	0	2	2
Cyclazodone	ZINC000000000190	Benzene and substituted derivatives	?	944	-4.72	-6.08377	-6.1	4.72	6.08377	6.1	1.11214	0.227236	0.511	0.564	0.538	0.157	0.34075	12	0	1	1	1	1	0	0	3	216.24	3.443	16	4	1	1	0	0	1	0.166667	18	1	0	68.7676	28	0	0	0	0	0	0	2	2
Diphenidol	ZINC000000968266	Benzene and substituted derivatives	Diphenylmethanes	945	-4.6	-5.94784	-6.2	4.6	5.94784	6.2	2.8316	1.28462	0.575	0.64	0.474	0.887	0.70575	17	4	1	0	0	1	0	0	3	309.453	8.6652	28	1	2	2	0	1	1	0.24	25	1	0	123.798	50	0	0	0	0	0	0	1	1
Diphenidol	ZINC000000968266	Benzene and substituted derivatives	Diphenylmethanes	946	-5.18	-6.26104	-6.5	5.18	6.26104	6.5	2.59645	1.60802	0.264	0.457	0.313	0.803	0.54575	17	4	1	0	0	1	0	0	3	309.453	8.6652	28	1	2	2	0	1	1	0.24	25	1	0	123.798	50	0	0	0	0	0	0	1	1
Diphenidol	ZINC000000968266	Benzene and substituted derivatives	Diphenylmethanes	947	-4.2	-6.49034	-6.5	4.2	6.49034	6.5	2.82823	1.76973	0.781	0.332	0.313	0.886	0.7165	17	4	1	0	0	1	0	0	3	309.453	8.6652	28	1	2	2	0	1	1	0.24	25	1	0	123.798	50	0	0	0	0	0	0	1	1
Rimiterol	ZINC000001565247	Phenols	Benzenediols	948	-4.52	-6.89467	-6.4	4.52	6.89467	6.4	1.8548	0.953067	0.625	0.164	0.362	0.495	0.49425	11	1	1	0	0	3	0	0	2	223.272	3.4976	20	3	4	3	0	1	1	0.117647	17	1	0	78.9701	33	0	0	0	0	0	0	1	3
Rimiterol	ZINC000001565247	Phenols	Benzenediols	949	-4.58	-6.86815	-6.4	4.58	6.86815	6.4	2.2548	1.30756	0.587	0.173	0.362	0.678	0.57625	11	1	1	0	0	3	0	0	2	223.272	3.4976	20	3	4	3	0	1	1	0.117647	17	1	0	78.9701	33	0	0	0	0	0	0	1	3
Rimiterol	ZINC000001565247	Phenols	Benzenediols	950	-4.64	-6.89449	-6.4	4.64	6.89449	6.4	2.15522	1.07166	0.551	0.165	0.362	0.638	0.54725	11	1	1	0	0	3	0	0	2	223.272	3.4976	20	3	4	3	0	1	1	0.117647	17	1	0	78.9701	33	0	0	0	0	0	0	1	3
Tiflorex	ZINC000000000772	Benzene and substituted derivatives	Phenethylamines	951	-5.03	-5.55709	-5.6	5.03	5.55709	5.6	1.22614	0.653942	0.342	0.836	0.81	0.211	0.3935	6	6	0	1	0	0	0	1	1	263.328	7.5351	17	1	1	0	0	0	1	0.352941	17	0	0	83.4251	33	3	0	0	0	0	3	1	0
Tiflorex	ZINC000000000772	Benzene and substituted derivatives	Phenethylamines	952	-4.57	-6.09129	-6.1	4.57	6.09129	6.1	2.50036	1.07093	0.595	0.558	0.538	0.767	0.66675	6	6	0	1	0	0	0	1	1	263.328	7.5351	17	1	1	0	0	0	1	0.352941	17	0	0	83.4251	33	3	0	0	0	0	3	1	0
Tiflorex	ZINC000000000772	Benzene and substituted derivatives	Phenethylamines	953	-5.38	-5.61111	-5.5	5.38	5.61111	5.5	1.37588	0.856502	0.182	0.816	0.852	0.284	0.4005	6	6	0	1	0	0	0	1	1	263.328	7.5351	17	1	1	0	0	0	1	0.352941	17	0	0	83.4251	33	3	0	0	0	0	3	1	0
Methastyridone	ZINC000000000479	Benzene and substituted derivatives	Styrenes	954	-4.59	-6.99872	-7	4.59	6.99872	7	1.09098	0.732429	0.581	0.132	0.129	0.147	0.251	9	4	1	0	1	1	0	0	2	217.268	4.7772	18	3	1	1	0	0	0	0.117647	17	1	0	76.1196	31	0	0	0	0	0	0	1	2
Methastyridone	ZINC000000000479	Benzene and substituted derivatives	Styrenes	955	-4.67	-7.00306	-7	4.67	7.00306	7	1.42931	0.248232	0.538	0.129	0.129	0.31	0.32175	9	4	1	0	1	1	0	0	2	217.268	4.7772	18	3	1	1	0	0	0	0.117647	17	1	0	76.1196	31	0	0	0	0	0	0	1	2
Methastyridone	ZINC000000000479	Benzene and substituted derivatives	Styrenes	956	-4.34	-6.04644	-6.1	4.34	6.04644	6.1	1.23019	0.842805	0.719	0.584	0.538	0.213	0.42075	9	4	1	0	1	1	0	0	2	217.268	4.7772	18	3	1	1	0	0	0	0.117647	17	1	0	76.1196	31	0	0	0	0	0	0	1	2
Methylphenidate	ZINC000000001267	Organonitrogen compounds	Amines	957	-4.01	-5.54902	-5.5	4.01	5.54902	5.5	2.2213	1.53008	0.856	0.839	0.852	0.664	0.759	11	3	1	0	0	2	0	0	2	233.311	6.4064	21	2	1	0	0	0	1	0.222222	18	1	0	85.7613	36	0	0	0	0	0	0	1	2
Methylphenidate	ZINC000000001267	Organonitrogen compounds	Amines	958	-4.21	-6.2674	-6.2	4.21	6.2674	6.2	2.60123	1.72737	0.777	0.453	0.474	0.805	0.71525	11	3	1	0	0	2	0	0	2	233.311	6.4064	21	2	1	0	0	0	1	0.222222	18	1	0	85.7613	36	0	0	0	0	0	0	1	2
Methylphenidate	ZINC000000001267	Organonitrogen compounds	Amines	959	-4.25	-6.2628	-6.2	4.25	6.2628	6.2	2.26486	1.51531	0.761	0.455	0.474	0.683	0.65025	11	3	1	0	0	2	0	0	2	233.311	6.4064	21	2	1	0	0	0	1	0.222222	18	1	0	85.7613	36	0	0	0	0	0	0	1	2
Robenacoxib	ZINC000000007562	Benzene and substituted derivatives	Aniline and substituted anilines	960	-4.78	-7.45697	-7.4	4.78	7.45697	7.4	2.08422	1.4598	0.478	0.04	0.045	0.606	0.43375	12	4	0	1	0	2	0	0	2	326.269	6.7178	14	2	1	2	1	0	0	0.208333	24	0	0	87.7829	35	4	0	0	0	0	4	1	2
Robenacoxib	ZINC000000007562	Benzene and substituted derivatives	Aniline and substituted anilines	961	-5.12	-6.74497	-6.7	5.12	6.74497	6.7	2.10345	1.46797	0.295	0.222	0.229	0.616	0.439	12	4	0	1	0	2	0	0	2	326.269	6.7178	14	2	1	2	1	0	0	0.208333	24	0	0	87.7829	35	4	0	0	0	0	4	1	2
Robenacoxib	ZINC000000007562	Benzene and substituted derivatives	Aniline and substituted anilines	962	-5.46	-7.07805	-7.1	5.46	7.07805	7.1	2.2401	1.15273	0.156	0.108	0.101	0.673	0.40075	12	4	0	1	0	2	0	0	2	326.269	6.7178	14	2	1	2	1	0	0	0.208333	24	0	0	87.7829	35	4	0	0	0	0	4	1	2
Bufexamac	ZINC000003871797	Benzene and substituted derivatives	Phenylacetamides	963	-5.16	-6.40413	-6.3	5.16	6.40413	6.3	2.60316	1.58122	0.277	0.377	0.421	0.806	0.5775	6	6	0	1	0	3	0	0	1	223.272	5.4745	20	4	2	2	1	0	0	0.4375	16	0	0	78.6396	33	0	0	0	0	0	0	1	3
Bufexamac	ZINC000003871797	Benzene and substituted derivatives	Phenylacetamides	964	-5.19	-6.39263	-6.3	5.19	6.39263	6.3	0.977694	0.400616	0.259	0.384	0.421	0.099	0.2195	6	6	0	1	0	3	0	0	1	223.272	5.4745	20	4	2	2	1	0	0	0.4375	16	0	0	78.6396	33	0	0	0	0	0	0	1	3
Bufexamac	ZINC000003871797	Benzene and substituted derivatives	Phenylacetamides	965	-5.16	-6.41942	-6.3	5.16	6.41942	6.3	0.840474	0.428088	0.277	0.37	0.421	0.062	0.2055	6	6	0	1	0	3	0	0	1	223.272	5.4745	20	4	2	2	1	0	0	0.4375	16	0	0	78.6396	33	0	0	0	0	0	0	1	3
Isbogrel	ZINC000013437583	Benzene and substituted derivatives	Styrenes	966	-4.8	-6.30449	-6.4	4.8	6.30449	6.4	1.21875	0.527802	0.47	0.432	0.362	0.207	0.3115	11	7	1	0	0	2	0	0	2	280.347	6.9531	20	3	0	1	1	0	0	0.318182	22	1	0	101.705	39	0	0	0	0	0	0	1	2
Isbogrel	ZINC000013437583	Benzene and substituted derivatives	Styrenes	967	-4.69	-6.22314	-6.2	4.69	6.22314	6.2	1.03588	0.259638	0.528	0.479	0.474	0.122	0.3115	11	7	1	0	0	2	0	0	2	280.347	6.9531	20	3	0	1	1	0	0	0.318182	22	1	0	101.705	39	0	0	0	0	0	0	1	2
Isbogrel	ZINC000013437583	Benzene and substituted derivatives	Styrenes	968	-5.18	-6.37935	-6.3	5.18	6.37935	6.3	1.07519	0.204429	0.264	0.39	0.421	0.14	0.24125	11	7	1	0	0	2	0	0	2	280.347	6.9531	20	3	0	1	1	0	0	0.318182	22	1	0	101.705	39	0	0	0	0	0	0	1	2
Seproxetine	ZINC000000004531	Benzene and substituted derivatives	Trifluoromethylbenzenes	969	-4.81	-7.13717	-7	4.81	7.13717	7	1.78569	0.254003	0.461	0.096	0.129	0.462	0.3785	12	4	0	1	0	1	0	0	2	295.304	7.6095	17	1	1	0	0	0	0	0.272727	22	0	0	92.7255	37	3	0	0	0	0	3	1	1
Seproxetine	ZINC000000004531	Benzene and substituted derivatives	Trifluoromethylbenzenes	970	-4.71	-6.47764	-6.3	4.71	6.47764	6.3	3.02666	1.7463	0.516	0.339	0.421	0.938	0.70325	12	4	0	1	0	1	0	0	2	295.304	7.6095	17	1	1	0	0	0	0	0.272727	22	0	0	92.7255	37	3	0	0	0	0	3	1	1
Seproxetine	ZINC000000004531	Benzene and substituted derivatives	Trifluoromethylbenzenes	971	-5.03	-7.01479	-7	5.03	7.01479	7	3.23262	1.71185	0.342	0.124	0.129	0.974	0.60475	12	4	0	1	0	1	0	0	2	295.304	7.6095	17	1	1	0	0	0	0	0.272727	22	0	0	92.7255	37	3	0	0	0	0	3	1	1
Mivazerol	ZINC000004674535	Benzene and substituted derivatives	Benzoic acids and derivatives	972	-5.55	-5.91605	-5.9	5.55	5.91605	5.9	2.60196	1.77502	0.126	0.662	0.662	0.805	0.5995	9	2	2	1	0	2	0	0	2	217.228	2.8774	15	4	3	2	0	0	0	0.176471	17	1	0	69.8407	27	0	0	0	0	0	0	3	2
Mivazerol	ZINC000004674535	Benzene and substituted derivatives	Benzoic acids and derivatives	973	-5.86	-5.9314	-5.9	5.86	5.9314	5.9	2.39582	1.67419	0.065	0.65	0.662	0.73	0.54675	9	2	2	1	0	2	0	0	2	217.228	2.8774	15	4	3	2	0	0	0	0.176471	17	1	0	69.8407	27	0	0	0	0	0	0	3	2
Mivazerol	ZINC000004674535	Benzene and substituted derivatives	Benzoic acids and derivatives	974	-5.43	-5.92526	-5.9	5.43	5.92526	5.9	2.23445	1.56663	0.165	0.655	0.662	0.67	0.54175	9	2	2	1	0	2	0	0	2	217.228	2.8774	15	4	3	2	0	0	0	0.176471	17	1	0	69.8407	27	0	0	0	0	0	0	3	2
Pranosal	ZINC000001999276	Benzene and substituted derivatives	Benzoic acids and derivatives	975	-4.75	-6.56441	-6.4	4.75	6.56441	6.4	1.0727	0.465614	0.495	0.293	0.362	0.139	0.28375	10	6	1	0	0	3	0	0	2	277.364	7.0878	26	3	2	2	0	0	1	0.285714	21	1	0	102.374	43	0	0	0	0	0	0	1	3
Pranosal	ZINC000001999276	Benzene and substituted derivatives	Benzoic acids and derivatives	976	-5.3	-6.48141	-6.3	5.3	6.48141	6.3	1.3344	0.680638	0.208	0.338	0.421	0.261	0.28775	10	6	1	0	0	3	0	0	2	277.364	7.0878	26	3	2	2	0	0	1	0.285714	21	1	0	102.374	43	0	0	0	0	0	0	1	3
Pranosal	ZINC000001999276	Benzene and substituted derivatives	Benzoic acids and derivatives	977	-5.46	-6.4852	-6.3	5.46	6.4852	6.3	1.4913	0.785783	0.156	0.336	0.421	0.337	0.31275	10	6	1	0	0	3	0	0	2	277.364	7.0878	26	3	2	2	0	0	1	0.285714	21	1	0	102.374	43	0	0	0	0	0	0	1	3
Odalprofen	ZINC000003777867	Benzene and substituted derivatives	Diphenylmethanes	978	-4.21	-7.9214	-7.9	4.21	7.9214	7.9	2.49944	1.07592	0.777	0.009	0.008	0.767	0.57975	15	5	2	0	0	2	0	0	3	320.392	6.9373	23	4	0	0	0	0	0	0.230769	26	1	0	114.275	44	0	0	0	0	0	0	2	2
Odalprofen	ZINC000003777867	Benzene and substituted derivatives	Diphenylmethanes	979	-4.38	-6.45694	-6.5	4.38	6.45694	6.5	2.50616	1.72737	0.698	0.349	0.313	0.769	0.63725	15	5	2	0	0	2	0	0	3	320.392	6.9373	23	4	0	0	0	0	0	0.230769	26	1	0	114.275	44	0	0	0	0	0	0	2	2
Odalprofen	ZINC000003777867	Benzene and substituted derivatives	Diphenylmethanes	980	-4.37	-7.94166	-8	4.37	7.94166	8	2.7311	1.86309	0.702	0.008	0.005	0.849	0.60125	15	5	2	0	0	2	0	0	3	320.392	6.9373	23	4	0	0	0	0	0	0.230769	26	1	0	114.275	44	0	0	0	0	0	0	2	2
Litoxetine	ZINC000000003647	Naphthalenes	?	981	-4.91	-6.81981	-6.9	4.91	6.81981	6.9	1.01378	0.672234	0.409	0.192	0.158	0.113	0.19825	15	1	1	0	0	1	0	0	3	241.334	7.5297	20	1	1	0	0	0	1	0.15	20	1	0	93.4533	37	0	0	0	0	0	0	1	1
Litoxetine	ZINC000000003647	Naphthalenes	?	982	-4.71	-6.61807	-6.6	4.71	6.61807	6.6	0.651633	0.41905	0.516	0.269	0.268	0.026	0.209	15	1	1	0	0	1	0	0	3	241.334	7.5297	20	1	1	0	0	0	1	0.15	20	1	0	93.4533	37	0	0	0	0	0	0	1	1
Litoxetine	ZINC000000003647	Naphthalenes	?	983	-4.62	-7.06339	-7	4.62	7.06339	7	1.17358	0.797019	0.564	0.113	0.129	0.187	0.26675	15	1	1	0	0	1	0	0	3	241.334	7.5297	20	1	1	0	0	0	1	0.15	20	1	0	93.4533	37	0	0	0	0	0	0	1	1
Flerobuterol	ZINC000001999470	Benzene and substituted derivatives	Halobenzenes	984	-4.05	-5.76895	-5.7	4.05	5.76895	5.7	1.8781	1.20734	0.839	0.74	0.763	0.507	0.654	6	6	0	1	0	1	0	0	1	211.28	5.2785	19	1	2	1	0	1	1	0.266667	15	0	0	79.9299	33	1	0	0	0	0	1	1	1
Flerobuterol	ZINC000001999470	Benzene and substituted derivatives	Halobenzenes	985	-3.66	-5.95462	-5.8	3.66	5.95462	5.8	1.91499	1.01155	0.942	0.634	0.715	0.528	0.67825	6	6	0	1	0	1	0	0	1	211.28	5.2785	19	1	2	1	0	1	1	0.266667	15	0	0	79.9299	33	1	0	0	0	0	1	1	1
Flerobuterol	ZINC000001999470	Benzene and substituted derivatives	Halobenzenes	986	-3.92	-5.80106	-5.7	3.92	5.80106	5.7	1.95388	1.20567	0.883	0.726	0.763	0.542	0.6825	6	6	0	1	0	1	0	0	1	211.28	5.2785	19	1	2	1	0	1	1	0.266667	15	0	0	79.9299	33	1	0	0	0	0	1	1	1
Cypenamine	ZINC000002037168	Organonitrogen compounds	Amines	987	-3.73	-6.07017	-6	3.73	6.07017	6	1.01066	0.0802987	0.929	0.569	0.6	0.111	0.43775	11	0	0	1	0	0	0	0	2	161.248	5.7366	15	0	1	0	0	0	0	0.0769231	13	0	0	68.1535	27	0	0	0	0	0	0	1	0
Cypenamine	ZINC000002037168	Organonitrogen compounds	Amines	988	-3.66	-6.07862	-6	3.66	6.07862	6	0.739398	0.084538	0.942	0.566	0.6	0.04	0.4055	11	0	0	1	0	0	0	0	2	161.248	5.7366	15	0	1	0	0	0	0	0.0769231	13	0	0	68.1535	27	0	0	0	0	0	0	1	0
Cypenamine	ZINC000002037168	Organonitrogen compounds	Amines	989	-3.28	-6.05263	-5.9	3.28	6.05263	5.9	0.793841	0.222589	0.986	0.58	0.662	0.049	0.4365	11	0	0	1	0	0	0	0	2	161.248	5.7366	15	0	1	0	0	0	0	0.0769231	13	0	0	68.1535	27	0	0	0	0	0	0	1	0
Pyrovalerone	ZINC000000000681	Organooxygen compounds	Carbonyl compounds	990	-4.29	-5.75945	-5.8	4.29	5.75945	5.8	2.74767	1.93844	0.743	0.744	0.715	0.857	0.793	10	6	1	0	0	1	0	0	2	245.366	7.9494	24	1	1	1	0	0	1	0.263158	19	1	0	99.0874	41	0	0	0	0	0	0	1	1
Pyrovalerone	ZINC000000000681	Organooxygen compounds	Carbonyl compounds	991	-4.8	-6.03263	-6.1	4.8	6.03263	6.1	2.76939	1.94054	0.47	0.59	0.538	0.866	0.685	10	6	1	0	0	1	0	0	2	245.366	7.9494	24	1	1	1	0	0	1	0.263158	19	1	0	99.0874	41	0	0	0	0	0	0	1	1
Pyrovalerone	ZINC000000000681	Organooxygen compounds	Carbonyl compounds	992	-4.62	-5.77668	-5.8	4.62	5.77668	5.8	2.76096	1.91682	0.564	0.736	0.715	0.862	0.75075	10	6	1	0	0	1	0	0	2	245.366	7.9494	24	1	1	1	0	0	1	0.263158	19	1	0	99.0874	41	0	0	0	0	0	0	1	1
Mepiperphenidol	ZINC000001748000	Benzene and substituted derivatives	Phenylbutylamines	993	-3.8	-6.25511	-6.1	3.8	6.25511	6.1	2.41195	0.932099	0.913	0.461	0.538	0.736	0.73075	14	5	1	0	0	1	0	0	3	290.471	10.1394	33	1	1	1	0	1	1	0.272727	22	1	0	124.035	53	0	0	0	0	0	0	1	1
Mepiperphenidol	ZINC000001748000	Benzene and substituted derivatives	Phenylbutylamines	994	-3.68	-6.26198	-6.3	3.68	6.26198	6.3	1.84042	1.02874	0.938	0.456	0.421	0.489	0.58425	11	8	1	0	0	1	0	0	2	290.471	10.1394	33	1	1	1	0	1	1	0.272727	22	1	0	124.035	53	0	0	0	0	0	0	1	1
Mepiperphenidol	ZINC000001748000	Benzene and substituted derivatives	Phenylbutylamines	995	-4.95	-6.59089	-6.4	4.95	6.59089	6.4	1.47033	0.868628	0.384	0.282	0.362	0.33	0.3515	11	8	1	0	0	1	0	0	2	290.471	10.1394	33	1	1	1	0	1	1	0.272727	22	1	0	124.035	53	0	0	0	0	0	0	1	1
Idropranolol	ZINC000000000383	Naphthalenes	?	996	-5	-6.47709	-6.3	5	6.47709	6.3	1.789	0.544446	0.359	0.34	0.421	0.464	0.427	10	6	0	1	0	2	0	0	2	261.365	7.459	25	2	2	1	0	1	1	0.3	20	0	0	104.495	42	0	0	0	0	0	0	1	2
Idropranolol	ZINC000000000383	Naphthalenes	?	997	-5.01	-6.28089	-6.1	5.01	6.28089	6.1	2.00683	0.539897	0.352	0.447	0.538	0.566	0.5055	10	6	0	1	0	2	0	0	2	261.365	7.459	25	2	2	1	0	1	1	0.3	20	0	0	104.495	42	0	0	0	0	0	0	1	2
Idropranolol	ZINC000000000383	Naphthalenes	?	998	-5.3	-6.53721	-6.2	5.3	6.53721	6.2	2.17658	1.18653	0.208	0.306	0.474	0.648	0.4945	10	6	0	1	0	2	0	0	2	261.365	7.459	25	2	2	1	0	1	1	0.3	20	0	0	104.495	42	0	0	0	0	0	0	1	2
Centanafadine	ZINC000034986938	Naphthalenes	?	999	-4.33	-7.7224	-7.7	4.33	7.7224	7.7	1.15664	0.773942	0.724	0.017	0.016	0.176	0.273	15	0	1	0	0	0	0	0	4	209.292	6.0878	15	0	1	0	0	0	1	0.0526316	19	1	0	81.1023	31	0	0	0	0	0	0	1	0
Centanafadine	ZINC000034986938	Naphthalenes	?	1000	-4.46	-7.40953	-7.4	4.46	7.40953	7.4	0.9776	0.661602	0.652	0.047	0.045	0.099	0.22375	15	0	1	0	0	0	0	0	4	209.292	6.0878	15	0	1	0	0	0	1	0.0526316	19	1	0	81.1023	31	0	0	0	0	0	0	1	0
Centanafadine	ZINC000034986938	Naphthalenes	?	1001	-4.15	-7.72591	-7.7	4.15	7.72591	7.7	1.10101	0.740155	0.803	0.017	0.016	0.153	0.28125	15	0	1	0	0	0	0	0	4	209.292	6.0878	15	0	1	0	0	0	1	0.0526316	19	1	0	81.1023	31	0	0	0	0	0	0	1	0
Atipamezole	ZINC000005424171	Indanes	?	1002	-4.27	-6.26748	-6.3	4.27	6.26748	6.3	1.33571	0.905083	0.751	0.452	0.421	0.262	0.424	12	2	2	0	0	0	0	0	3	212.296	5.5897	17	1	1	1	0	0	0	0.111111	18	1	0	82.0144	32	0	0	0	0	0	0	2	0
Atipamezole	ZINC000005424171	Indanes	?	1003	-4.12	-6.26462	-6.3	4.12	6.26462	6.3	1.33214	0.925802	0.816	0.454	0.421	0.26	0.43925	12	2	2	0	0	0	0	0	3	212.296	5.5897	17	1	1	1	0	0	0	0.111111	18	1	0	82.0144	32	0	0	0	0	0	0	2	0
Atipamezole	ZINC000005424171	Indanes	?	1004	-4.13	-6.8182	-6.8	4.13	6.8182	6.8	1.65514	1.13106	0.812	0.192	0.194	0.404	0.4535	12	2	2	0	0	0	0	0	3	212.296	5.5897	17	1	1	1	0	0	0	0.111111	18	1	0	82.0144	32	0	0	0	0	0	0	2	0
Zoniclezole	ZINC000001851203	Benzisoxazoles	?	1005	-4.92	-5.73814	-5.7	4.92	5.73814	5.7	1.40894	0.986334	0.403	0.752	0.763	0.3	0.4415	10	2	3	0	1	0	0	0	3	247.685	4.6832	12	4	0	0	0	0	0	0.105263	19	2	0	75.93	27	1	0	0	1	0	0	3	1
Zoniclezole	ZINC000001851203	Benzisoxazoles	?	1006	-4.72	-5.69173	-5.7	4.72	5.69173	5.7	1.067	0.739335	0.511	0.774	0.763	0.136	0.3865	10	2	3	0	1	0	0	0	3	247.685	4.6832	12	4	0	0	0	0	0	0.105263	19	2	0	75.93	27	1	0	0	1	0	0	3	1
Zoniclezole	ZINC000001851203	Benzisoxazoles	?	1007	-4.82	-5.62356	-5.7	4.82	5.62356	5.7	0.888759	0.522028	0.456	0.811	0.763	0.074	0.34175	10	2	3	0	1	0	0	0	3	247.685	4.6832	12	4	0	0	0	0	0	0.105263	19	2	0	75.93	27	1	0	0	1	0	0	3	1
Brosuximide	ZINC000095564734	Pyrrolidines	Phenylpyrrolidines	1008	-4.18	-6.18284	-6.2	4.18	6.18284	6.2	1.28153	0.883691	0.789	0.504	0.474	0.237	0.43425	10	0	1	0	0	2	0	0	2	254.083	3.1494	11	3	1	1	0	0	0	0.0666667	15	1	0	60.7586	22	1	0	1	0	0	0	1	2
Brosuximide	ZINC000095564734	Pyrrolidines	Phenylpyrrolidines	1009	-4.44	-5.85169	-5.9	4.44	5.85169	5.9	1.28107	0.816201	0.664	0.698	0.662	0.237	0.45	10	0	1	0	0	2	0	0	2	254.083	3.1494	11	3	1	1	0	0	0	0.0666667	15	1	0	60.7586	22	1	0	1	0	0	0	1	2
Brosuximide	ZINC000095564734	Pyrrolidines	Phenylpyrrolidines	1010	-4.39	-6.19749	-6.2	4.39	6.19749	6.2	1.67084	1.08427	0.692	0.495	0.474	0.414	0.4985	10	0	1	0	0	2	0	0	2	254.083	3.1494	11	3	1	1	0	0	0	0.0666667	15	1	0	60.7586	22	1	0	1	0	0	0	1	2
Levofacetoperane	ZINC000032228596	Benzene and substituted derivatives	Benzyloxycarbonyls	1011	-4.39	-5.99967	-6	4.39	5.99967	6	2.57143	1.04127	0.692	0.609	0.6	0.793	0.7195	11	3	1	0	0	2	0	0	2	233.311	6.4064	21	2	1	0	0	0	1	0.222222	18	1	0	85.7613	36	0	0	0	0	0	0	1	2
Levofacetoperane	ZINC000032228596	Benzene and substituted derivatives	Benzyloxycarbonyls	1012	-3.78	-6.00424	-6	3.78	6.00424	6	2.35657	1.65569	0.917	0.606	0.6	0.715	0.73675	11	3	1	0	0	2	0	0	2	233.311	6.4064	21	2	1	0	0	0	1	0.222222	18	1	0	85.7613	36	0	0	0	0	0	0	1	2
Levofacetoperane	ZINC000032228596	Benzene and substituted derivatives	Benzyloxycarbonyls	1013	-4.01	-5.87819	-5.9	4.01	5.87819	5.9	2.23921	1.48764	0.856	0.684	0.662	0.672	0.7155	11	3	1	0	0	2	0	0	2	233.311	6.4064	21	2	1	0	0	0	1	0.222222	18	1	0	85.7613	36	0	0	0	0	0	0	1	2
Piraxelate	ZINC000033852272	Carboxylic acids and derivatives	Amino acids, peptides, and analogues	1014	-3.99	-6.01707	-5.9	3.99	6.01707	5.9	1.4609	1.02605	0.862	0.601	0.662	0.324	0.543	10	5	1	0	0	3	0	0	2	267.369	7.4166	29	4	0	0	0	0	0	0.2	20	1	0	98.3172	44	0	0	0	0	0	0	1	3
Piraxelate	ZINC000033852272	Carboxylic acids and derivatives	Amino acids, peptides, and analogues	1015	-4.02	-6.19008	-6.2	4.02	6.19008	6.2	1.00674	0.682271	0.852	0.5	0.474	0.109	0.386	10	5	1	0	0	3	0	0	2	267.369	7.4166	29	4	0	0	0	0	0	0.2	20	1	0	98.3172	44	0	0	0	0	0	0	1	3
Piraxelate	ZINC000033852272	Carboxylic acids and derivatives	Amino acids, peptides, and analogues	1016	-4.42	-6.27326	-6.2	4.42	6.27326	6.2	1.49501	0.329666	0.677	0.45	0.474	0.338	0.45675	10	5	1	0	0	3	0	0	2	267.369	7.4166	29	4	0	0	0	0	0	0.2	20	1	0	98.3172	44	0	0	0	0	0	0	1	3
Dioxadrol	ZINC000003080605	Benzene and substituted derivatives	Diphenylmethanes	1017	-4.74	-7.61366	-7.6	4.74	7.61366	7.6	2.98704	2.10559	0.499	0.025	0.024	0.928	0.59475	20	0	1	0	2	0	0	0	4	309.409	8.5827	25	2	1	0	0	0	1	0.115385	26	2	0	113.13	46	0	0	0	0	0	0	1	2
Feprosidnine	ZINC000020805626	Benzene and substituted derivatives	Phenethylamines	1018	-4.65	-6.30196	-6.3	4.65	6.30196	6.3	2.63541	1.46878	0.547	0.435	0.421	0.819	0.6515	8	3	2	1	1	0	0	0	2	204.253	4.2662	16	3	1	0	0	0	0	0.1875	16	1	0	73.2088	29	0	0	0	0	0	0	3	1
Feprosidnine	ZINC000020805626	Benzene and substituted derivatives	Phenethylamines	1019	-4.45	-6.1613	-5.7	4.45	6.1613	5.7	2.389	0.787177	0.658	0.518	0.763	0.728	0.71925	8	3	2	1	1	0	0	0	2	204.253	4.2662	16	3	1	0	0	0	0	0.1875	16	1	0	73.2088	29	0	0	0	0	0	0	3	1
Feprosidnine	ZINC000020805626	Benzene and substituted derivatives	Phenethylamines	1020	-4.15	-6.30344	-6.2	4.15	6.30344	6.2	2.47525	1.41434	0.803	0.433	0.474	0.759	0.69875	8	3	2	1	1	0	0	0	2	204.253	4.2662	16	3	1	0	0	0	0	0.1875	16	1	0	73.2088	29	0	0	0	0	0	0	3	1
Triflusal	ZINC000000002220	Benzene and substituted derivatives	Benzoic acids and derivatives	1021	-3.91	-5.77954	-5.8	3.91	5.77954	5.8	2.16615	0.684407	0.885	0.734	0.715	0.644	0.722	6	4	0	0	0	4	0	0	1	247.148	3.4356	9	4	0	1	1	0	0	0.235294	17	0	0	54.302	23	3	0	0	0	0	3	0	4
Triflusal	ZINC000000002220	Benzene and substituted derivatives	Benzoic acids and derivatives	1022	-3.86	-5.64376	-5.8	3.86	5.64376	5.8	2.05584	0.773549	0.9	0.801	0.715	0.591	0.69925	6	4	0	0	0	4	0	0	1	247.148	3.4356	9	4	0	1	1	0	0	0.235294	17	0	0	54.302	23	3	0	0	0	0	3	0	4
Triflusal	ZINC000000002220	Benzene and substituted derivatives	Benzoic acids and derivatives	1023	-4.09	-5.92898	-6	4.09	5.92898	6	2.21888	1.05494	0.826	0.652	0.6	0.663	0.688	6	4	0	0	0	4	0	0	1	247.148	3.4356	9	4	0	1	1	0	0	0.235294	17	0	0	54.302	23	3	0	0	0	0	3	0	4
Dextrofemine	ZINC000001842961	Benzene and substituted derivatives	Phenethylamines	1024	-5.57	-6.99734	-7	5.57	6.99734	7	1.4282	0.268986	0.12	0.132	0.129	0.309	0.21675	12	6	0	1	0	1	0	0	2	269.388	8.6517	24	1	1	0	0	0	1	0.333333	21	0	0	109.732	43	0	0	0	0	0	0	1	1
Dextrofemine	ZINC000001842961	Benzene and substituted derivatives	Phenethylamines	1025	-5.11	-6.98319	-7	5.11	6.98319	7	1.32038	0.314136	0.3	0.137	0.129	0.256	0.23525	12	6	0	1	0	1	0	0	2	269.388	8.6517	24	1	1	0	0	0	1	0.333333	21	0	0	109.732	43	0	0	0	0	0	0	1	1
Dextrofemine	ZINC000001842961	Benzene and substituted derivatives	Phenethylamines	1026	-4.85	-7.20556	-7.2	4.85	7.20556	7.2	0.869655	0.573263	0.44	0.084	0.08	0.071	0.1655	12	6	0	1	0	1	0	0	2	269.388	8.6517	24	1	1	0	0	0	1	0.333333	21	0	0	109.732	43	0	0	0	0	0	0	1	1
Dazadrol	ZINC000011616987	Benzene and substituted derivatives	Halobenzenes	1027	-4.13	-5.67011	-5.5	4.13	5.67011	5.5	2.72039	1.74152	0.812	0.784	0.852	0.845	0.8385	14	1	3	0	0	1	0	0	3	287.75	3.9961	18	4	2	2	0	1	1	0.136364	22	2	0	88.5516	34	1	0	0	1	0	0	3	1
Dazadrol	ZINC000011616987	Benzene and substituted derivatives	Halobenzenes	1028	-4.38	-6.00369	-5.9	4.38	6.00369	5.9	2.12051	1.26488	0.698	0.606	0.662	0.624	0.652	14	1	3	0	0	1	0	0	3	287.75	3.9961	18	4	2	2	0	1	1	0.136364	22	2	0	88.5516	34	1	0	0	1	0	0	3	1
Dazadrol	ZINC000011616987	Benzene and substituted derivatives	Halobenzenes	1029	-4.49	-5.65355	-5.5	4.49	5.65355	5.5	2.03663	1.18313	0.638	0.794	0.852	0.582	0.6635	14	1	3	0	0	1	0	0	3	287.75	3.9961	18	4	2	2	0	1	1	0.136364	22	2	0	88.5516	34	1	0	0	1	0	0	3	1
Butaverine	ZINC000001569382	Fatty Acyls	Fatty acid esters	1030	-5.4	-5.59319	-5.3	5.4	5.59319	5.3	1.97584	1.26699	0.176	0.824	0.912	0.552	0.548	11	7	1	0	0	2	0	0	2	289.419	9.0512	29	2	1	1	0	0	1	0.363636	22	1	0	113.634	48	0	0	0	0	0	0	1	2
Butaverine	ZINC000001569382	Fatty Acyls	Fatty acid esters	1031	-5.44	-5.45643	-5.7	5.44	5.45643	5.7	1.98753	1.35568	0.162	0.871	0.763	0.557	0.50975	11	7	1	0	0	2	0	0	2	289.419	9.0512	29	2	1	1	0	0	1	0.363636	22	1	0	113.634	48	0	0	0	0	0	0	1	2
Butaverine	ZINC000001569382	Fatty Acyls	Fatty acid esters	1032	-5.24	-6.18542	-6.1	5.24	6.18542	6.1	2.98845	2.0584	0.233	0.502	0.538	0.928	0.65675	11	7	1	0	0	2	0	0	2	289.419	9.0512	29	2	1	1	0	0	1	0.363636	22	1	0	113.634	48	0	0	0	0	0	0	1	2
Pyrovalerone	ZINC000000000681	Organooxygen compounds	Carbonyl compounds	1033	-3.9	-5.56527	-5.6	3.9	5.56527	5.6	2.78701	1.18976	0.887	0.833	0.81	0.871	0.85975	10	6	1	0	0	1	0	0	2	245.366	7.9494	24	1	1	1	0	0	1	0.263158	19	1	0	99.0874	41	0	0	0	0	0	0	1	1
Pyrovalerone	ZINC000000000681	Organooxygen compounds	Carbonyl compounds	1034	-4.69	-5.55472	-5.6	4.69	5.55472	5.6	2.53707	1.76083	0.528	0.837	0.81	0.779	0.724	10	6	1	0	0	1	0	0	2	245.366	7.9494	24	1	1	1	0	0	1	0.263158	19	1	0	99.0874	41	0	0	0	0	0	0	1	1
Pyrovalerone	ZINC000000000681	Organooxygen compounds	Carbonyl compounds	1035	-4.28	-5.98929	-6.1	4.28	5.98929	6.1	2.335	1.61424	0.746	0.614	0.538	0.706	0.674	10	6	1	0	0	1	0	0	2	245.366	7.9494	24	1	1	1	0	0	1	0.263158	19	1	0	99.0874	41	0	0	0	0	0	0	1	1
Diphenhydramine	ZINC000000020244	Benzene and substituted derivatives	Diphenylmethanes	1036	-5.09	-6.29699	-6.3	5.09	6.29699	6.3	1.49916	1.04453	0.31	0.437	0.421	0.34	0.35275	12	5	0	1	0	1	0	0	2	255.361	7.7059	22	1	1	1	0	0	1	0.3	20	0	0	102.559	40	0	0	0	0	0	0	1	1
Diphenhydramine	ZINC000000020244	Benzene and substituted derivatives	Diphenylmethanes	1037	-4.91	-6.24041	-6.3	4.91	6.24041	6.3	1.66578	1.11129	0.409	0.467	0.421	0.411	0.413	12	5	0	1	0	1	0	0	2	255.361	7.7059	22	1	1	1	0	0	1	0.3	20	0	0	102.559	40	0	0	0	0	0	0	1	1
Diphenhydramine	ZINC000000020244	Benzene and substituted derivatives	Diphenylmethanes	1038	-4.8	-6.13342	-6.1	4.8	6.13342	6.1	1.56596	1.08389	0.47	0.534	0.538	0.368	0.436	12	5	0	1	0	1	0	0	2	255.361	7.7059	22	1	1	1	0	0	1	0.3	20	0	0	102.559	40	0	0	0	0	0	0	1	1
Pridefine	ZINC000001482148	Benzene and substituted derivatives	Diphenylmethanes	1039	-3.89	-6.64654	-6.8	3.89	6.64654	6.8	2.87208	2.00702	0.891	0.262	0.194	0.898	0.72025	16	3	1	0	0	0	0	0	3	263.384	8.1313	21	0	1	1	0	0	1	0.136364	22	1	0	106.777	41	0	0	0	0	0	0	1	0
Pridefine	ZINC000001482148	Benzene and substituted derivatives	Diphenylmethanes	1040	-5.04	-7.10428	-6.8	5.04	7.10428	6.8	1.47221	0.265011	0.336	0.102	0.194	0.33	0.2975	16	3	1	0	0	0	0	0	3	263.384	8.1313	21	0	1	1	0	0	1	0.136364	22	1	0	106.777	41	0	0	0	0	0	0	1	0
Pridefine	ZINC000001482148	Benzene and substituted derivatives	Diphenylmethanes	1041	-4.12	-6.89991	-6.5	4.12	6.89991	6.5	2.83083	1.97461	0.816	0.162	0.313	0.887	0.72575	16	3	1	0	0	0	0	0	3	263.384	8.1313	21	0	1	1	0	0	1	0.136364	22	1	0	106.777	41	0	0	0	0	0	0	1	0
Fenbufen	ZINC000000001427	Organooxygen compounds	Carbonyl compounds	1042	-4.11	-7.31869	-7.3	4.11	7.31869	7.3	2.2606	0.824169	0.821	0.062	0.061	0.682	0.5615	12	4	0	0	0	3	0	0	2	253.277	5.4395	15	3	0	1	1	0	0	0.25	20	0	0	85.257	32	0	0	0	0	0	0	0	3
Fenbufen	ZINC000000001427	Organooxygen compounds	Carbonyl compounds	1043	-4.74	-6.07447	-6.1	4.74	6.07447	6.1	2.68267	1.05324	0.499	0.568	0.538	0.832	0.67525	12	4	0	0	0	3	0	0	2	253.277	5.4395	15	3	0	1	1	0	0	0.25	20	0	0	85.257	32	0	0	0	0	0	0	0	3
Fenbufen	ZINC000000001427	Organooxygen compounds	Carbonyl compounds	1044	-4.32	-5.85132	-5.7	4.32	5.85132	5.7	3.54953	0.0301331	0.729	0.699	0.763	0.993	0.8695	12	4	0	0	0	3	0	0	2	253.277	5.4395	15	3	0	1	1	0	0	0.25	20	0	0	85.257	32	0	0	0	0	0	0	0	3
Indenolol	ZINC000000000389	Indenes and isoindenes	?	1045	-5.03	-6.66002	-6.5	5.03	6.66002	6.5	1.80871	0.948475	0.342	0.254	0.313	0.474	0.40075	9	6	0	1	0	2	0	0	2	247.338	6.7522	23	2	2	1	0	1	1	0.315789	19	0	0	97.5739	39	0	0	0	0	0	0	1	2
Indenolol	ZINC000000000389	Indenes and isoindenes	?	1046	-4.14	-6.77647	-6.6	4.14	6.77647	6.6	1.3902	0.713909	0.806	0.209	0.268	0.291	0.414	9	6	0	1	0	2	0	0	2	247.338	6.7522	23	2	2	1	0	1	1	0.315789	19	0	0	97.5739	39	0	0	0	0	0	0	1	2
Indenolol	ZINC000000000389	Indenes and isoindenes	?	1047	-5.6	-6.78788	-6.6	5.6	6.78788	6.6	1.60608	0.89496	0.112	0.204	0.268	0.385	0.2875	9	6	0	1	0	2	0	0	2	247.338	6.7522	23	2	2	1	0	1	1	0.315789	19	0	0	97.5739	39	0	0	0	0	0	0	1	2
Bicifadine	ZINC000005781680	Piperidines	Phenylpiperidines	1048	-3.98	-6.02928	-6.1	3.98	6.02928	6.1	1.19175	0.705451	0.865	0.593	0.538	0.194	0.44775	11	1	1	0	0	0	0	0	3	173.259	5.3733	15	0	1	0	0	0	1	0.0666667	15	1	0	68.5623	28	0	0	0	0	0	0	1	0
Bicifadine	ZINC000005781680	Piperidines	Phenylpiperidines	1049	-3.76	-6.05637	-6.1	3.76	6.05637	6.1	1.41967	0.983845	0.922	0.579	0.538	0.304	0.517	11	1	1	0	0	0	0	0	3	173.259	5.3733	15	0	1	0	0	0	1	0.0666667	15	1	0	68.5623	28	0	0	0	0	0	0	1	0
Bicifadine	ZINC000005781680	Piperidines	Phenylpiperidines	1050	-4.02	-6.12627	-6.1	4.02	6.12627	6.1	1.06106	0.737744	0.852	0.539	0.538	0.133	0.414	11	1	1	0	0	0	0	0	3	173.259	5.3733	15	0	1	0	0	0	1	0.0666667	15	1	0	68.5623	28	0	0	0	0	0	0	1	0
Phenyramidol	ZINC000022910917	Pyridines and derivatives	Aminopyridines and derivatives	1051	-5.16	-6.37987	-6.2	5.16	6.37987	6.2	2.74853	1.09657	0.277	0.39	0.474	0.858	0.61675	11	2	1	1	0	1	0	0	2	214.268	4.2364	17	3	2	2	0	1	0	0.235294	17	1	0	79.0402	30	0	0	0	0	0	0	2	1
Phenyramidol	ZINC000022910917	Pyridines and derivatives	Aminopyridines and derivatives	1052	-4.77	-6.86962	-6.7	4.77	6.86962	6.7	2.33784	1.35798	0.483	0.173	0.229	0.708	0.532	11	2	1	1	0	1	0	0	2	214.268	4.2364	17	3	2	2	0	1	0	0.235294	17	1	0	79.0402	30	0	0	0	0	0	0	2	1
Phenyramidol	ZINC000022910917	Pyridines and derivatives	Aminopyridines and derivatives	1053	-5.02	-6.49418	-6.4	5.02	6.49418	6.4	2.72492	1.63791	0.346	0.329	0.362	0.846	0.6	11	2	1	1	0	1	0	0	2	214.268	4.2364	17	3	2	2	0	1	0	0.235294	17	1	0	79.0402	30	0	0	0	0	0	0	2	1
Naprodoxime	ZINC000006019931	Naphthalenes	?	1054	-4.55	-6.8659	-6.7	4.55	6.8659	6.7	1.34727	0.701868	0.608	0.175	0.229	0.269	0.34375	10	3	0	2	0	2	0	0	2	230.267	5.54	18	4	2	1	0	0	1	0.166667	18	0	0	81.691	31	0	0	0	0	0	0	2	2
Naprodoxime	ZINC000006019931	Naphthalenes	?	1055	-4.89	-6.57966	-6.4	4.89	6.57966	6.4	1.11084	0.692016	0.418	0.287	0.362	0.156	0.273	10	3	0	2	0	2	0	0	2	230.267	5.54	18	4	2	1	0	0	1	0.166667	18	0	0	81.691	31	0	0	0	0	0	0	2	2
Naprodoxime	ZINC000006019931	Naphthalenes	?	1056	-4.83	-6.31199	-6.3	4.83	6.31199	6.3	1.20532	0.305516	0.451	0.427	0.421	0.201	0.3185	10	3	0	2	0	2	0	0	2	230.267	5.54	18	4	2	1	0	0	1	0.166667	18	0	0	81.691	31	0	0	0	0	0	0	2	2
Clemeprol	ZINC000034220988	Benzene and substituted derivatives	Diphenylmethanes	1057	-3.86	-6.42114	-6.3	3.86	6.42114	6.3	2.37939	0.930568	0.9	0.369	0.421	0.723	0.69175	12	5	0	1	0	1	0	0	2	289.806	7.234	21	1	2	2	0	1	1	0.238095	21	0	0	106.926	40	1	0	0	1	0	0	1	1
Clemeprol	ZINC000034220988	Benzene and substituted derivatives	Diphenylmethanes	1058	-4.86	-6.23497	-6	4.86	6.23497	6	1.68762	0.937067	0.435	0.469	0.6	0.422	0.46975	12	5	0	1	0	1	0	0	2	289.806	7.234	21	1	2	2	0	1	1	0.238095	21	0	0	106.926	40	1	0	0	1	0	0	1	1
Clemeprol	ZINC000034220988	Benzene and substituted derivatives	Diphenylmethanes	1059	-4.53	-5.90392	-5.9	4.53	5.90392	5.9	2.67352	1.13054	0.62	0.669	0.662	0.83	0.7355	12	5	0	1	0	1	0	0	2	289.806	7.234	21	1	2	2	0	1	1	0.238095	21	0	0	106.926	40	1	0	0	1	0	0	1	1
Flumexadol	ZINC000001571539	Oxazinanes	Morpholines	1060	-4.23	-6.11149	-6.3	4.23	6.11149	6.3	2.15553	0.383357	0.768	0.546	0.421	0.639	0.61675	10	1	1	0	1	0	0	0	2	231.217	5.6127	13	1	1	0	0	0	1	0.117647	17	1	0	63.9363	28	3	0	0	0	0	3	1	1
Flumexadol	ZINC000001571539	Oxazinanes	Morpholines	1061	-4.47	-6.17962	-6.2	4.47	6.17962	6.2	1.62864	0.468458	0.648	0.507	0.474	0.395	0.478	10	1	1	0	1	0	0	0	2	231.217	5.6127	13	1	1	0	0	0	1	0.117647	17	1	0	63.9363	28	3	0	0	0	0	3	1	1
Flumexadol	ZINC000001571539	Oxazinanes	Morpholines	1062	-4.4	-6.29088	-6.3	4.4	6.29088	6.3	1.7027	0.550099	0.688	0.441	0.421	0.429	0.49175	10	1	1	0	1	0	0	0	2	231.217	5.6127	13	1	1	0	0	0	1	0.117647	17	1	0	63.9363	28	3	0	0	0	0	3	1	1
Ciclafrine	ZINC000004626626	Azaspirodecane derivatives	?	1063	-4.14	-6.09619	-5.9	4.14	6.09619	5.9	1.42706	0.897328	0.806	0.556	0.662	0.308	0.521	15	0	1	0	1	1	0	0	3	247.338	6.5237	23	2	2	1	0	0	1	0.05	20	1	0	92.7673	39	0	0	0	0	0	0	1	2
Ciclafrine	ZINC000004626626	Azaspirodecane derivatives	?	1064	-3.84	-6.84095	-6.6	3.84	6.84095	6.6	1.40594	0.70834	0.905	0.181	0.268	0.298	0.44225	15	0	1	0	1	1	0	0	3	247.338	6.5237	23	2	2	1	0	0	1	0.05	20	1	0	92.7673	39	0	0	0	0	0	0	1	2
Ciclafrine	ZINC000004626626	Azaspirodecane derivatives	?	1065	-4.88	-8.05459	-7.8	4.88	8.05459	7.8	1.40271	0.935527	0.422	0.004	0.012	0.297	0.257	15	0	1	0	1	1	0	0	3	247.338	6.5237	23	2	2	1	0	0	1	0.05	20	1	0	92.7673	39	0	0	0	0	0	0	1	2
Dexefaroxan	ZINC000001842775	Coumarans	?	1066	-4.16	-5.73376	-5.7	4.16	5.73376	5.7	1.31504	0.927593	0.798	0.756	0.763	0.253	0.51675	11	2	2	0	1	0	0	0	3	216.284	4.84	19	3	1	1	0	0	1	0.111111	18	2	0	76.0208	32	0	0	0	0	0	0	2	1
Dexefaroxan	ZINC000001842775	Coumarans	?	1067	-3.86	-5.73474	-5.7	3.86	5.73474	5.7	1.35339	0.942521	0.9	0.755	0.763	0.273	0.55225	11	2	2	0	1	0	0	0	3	216.284	4.84	19	3	1	1	0	0	1	0.111111	18	2	0	76.0208	32	0	0	0	0	0	0	2	1
Dexefaroxan	ZINC000001842775	Coumarans	?	1068	-4.57	-5.73413	-5.7	4.57	5.73413	5.7	1.52882	1.06872	0.595	0.756	0.763	0.353	0.516	11	2	2	0	1	0	0	0	3	216.284	4.84	19	3	1	1	0	0	1	0.111111	18	2	0	76.0208	32	0	0	0	0	0	0	2	1
Fluprofen	ZINC000003598315	Benzene and substituted derivatives	Biphenyls and derivatives	1069	-3.59	-7.08995	-7.1	3.59	7.08995	7.1	1.32347	0.926785	0.954	0.105	0.101	0.257	0.39225	12	3	0	0	0	2	0	0	2	243.257	5.621	13	2	0	1	1	0	0	0.157895	19	0	0	78.9295	30	1	0	0	0	0	1	0	2
Fluprofen	ZINC000003598315	Benzene and substituted derivatives	Biphenyls and derivatives	1070	-3.58	-6.36014	-6.4	3.58	6.36014	6.4	1.07631	0.261759	0.956	0.403	0.362	0.141	0.4	12	3	0	0	0	2	0	0	2	243.257	5.621	13	2	0	1	1	0	0	0.157895	19	0	0	78.9295	30	1	0	0	0	0	1	0	2
Fluprofen	ZINC000003598315	Benzene and substituted derivatives	Biphenyls and derivatives	1071	-3.91	-6.34217	-6.4	3.91	6.34217	6.4	1.19111	0.772051	0.885	0.413	0.362	0.193	0.40825	12	3	0	0	0	2	0	0	2	243.257	5.621	13	2	0	1	1	0	0	0.157895	19	0	0	78.9295	30	1	0	0	0	0	1	0	2
Trihexyphenidyl	ZINC000000968274	Organonitrogen compounds	Amines	1072	-4.1	-6.13754	-6	4.1	6.13754	6	2.37161	1.41165	0.823	0.532	0.6	0.719	0.71525	17	3	1	0	0	1	0	0	3	301.474	9.7967	32	1	2	2	0	1	1	0.208333	24	1	0	125.46	53	0	0	0	0	0	0	1	1
Trihexyphenidyl	ZINC000000968274	Organonitrogen compounds	Amines	1073	-4.18	-6.47694	-6.6	4.18	6.47694	6.6	2.81565	1.61967	0.789	0.34	0.268	0.882	0.70525	17	3	1	0	0	1	0	0	3	301.474	9.7967	32	1	2	2	0	1	1	0.208333	24	1	0	125.46	53	0	0	0	0	0	0	1	1
Trihexyphenidyl	ZINC000000968274	Organonitrogen compounds	Amines	1074	-4.26	-7.22721	-7	4.26	7.22721	7	2.59498	1.57005	0.756	0.078	0.129	0.803	0.62275	17	3	1	0	0	1	0	0	3	301.474	9.7967	32	1	2	2	0	1	1	0.208333	24	1	0	125.46	53	0	0	0	0	0	0	1	1
Tegafur	ZINC000000016956	Diazines	Pyrimidines and pyrimidine derivatives	1075	-4.37	-5.29107	-5.3	4.37	5.29107	5.3	1.4691	0.976294	0.702	0.919	0.912	0.329	0.568	8	0	2	0	1	2	0	0	2	200.169	1.8381	12	4	1	1	0	0	0	0.0666667	15	2	0	55.3534	23	1	0	0	0	0	1	2	3
Tegafur	ZINC000000016956	Diazines	Pyrimidines and pyrimidine derivatives	1076	-4.35	-5.31423	-5.3	4.35	5.31423	5.3	1.43789	1.00385	0.713	0.916	0.912	0.313	0.56275	8	0	2	0	1	2	0	0	2	200.169	1.8381	12	4	1	1	0	0	0	0.0666667	15	2	0	55.3534	23	1	0	0	0	0	1	2	3
Tegafur	ZINC000000016956	Diazines	Pyrimidines and pyrimidine derivatives	1077	-4.6	-5.31845	-5.3	4.6	5.31845	5.3	1.09302	0.747413	0.575	0.915	0.912	0.149	0.44625	8	0	2	0	1	2	0	0	2	200.169	1.8381	12	4	1	1	0	0	0	0.0666667	15	2	0	55.3534	23	1	0	0	0	0	1	2	3
Caroxazone	ZINC000000001095	Benzoxazines	?	1078	-4.52	-6.28904	-6.3	4.52	6.28904	6.3	1.22912	0.86335	0.625	0.443	0.421	0.212	0.3675	8	2	1	1	1	2	0	0	2	206.201	3.2216	15	5	1	0	0	0	0	0.125	16	1	0	59.954	25	0	0	0	0	0	0	2	3
Caroxazone	ZINC000000001095	Benzoxazines	?	1079	-4.52	-6.28031	-6.3	4.52	6.28031	6.3	0.674706	0.473913	0.625	0.447	0.421	0.032	0.2775	8	2	1	1	1	2	0	0	2	206.201	3.2216	15	5	1	0	0	0	0	0.125	16	1	0	59.954	25	0	0	0	0	0	0	2	3
Caroxazone	ZINC000000001095	Benzoxazines	?	1080	-4.52	-6.2757	-6.3	4.52	6.2757	6.3	0.67095	0.456832	0.625	0.45	0.421	0.031	0.277	8	2	1	1	1	2	0	0	2	206.201	3.2216	15	5	1	0	0	0	0	0.125	16	1	0	59.954	25	0	0	0	0	0	0	2	3
Cyclocumarol	ZINC000004212731	Coumarins and derivatives	Pyranocoumarins	1081	-5.14	-4.01587	-3.9	5.14	4.01587	3.9	2.11461	1.48485	0.285	0.997	0.998	0.621	0.63125	18	2	0	0	2	2	0	0	4	322.36	6.9392	21	4	0	0	0	0	0	0.0740741	27	2	0	110.885	42	0	0	0	0	0	0	0	4
Amoxydramine	ZINC000000000932	Benzene and substituted derivatives	Diphenylmethanes	1082	-4.59	-6.34948	-5.9	4.59	6.34948	5.9	1.84289	0.957884	0.581	0.408	0.662	0.49	0.55575	12	5	0	1	0	2	0	0	2	271.36	7.7185	22	2	0	1	0	0	1	0.285714	21	0	0	103.089	41	0	0	0	0	0	0	1	2
Amoxydramine	ZINC000000000932	Benzene and substituted derivatives	Diphenylmethanes	1083	-4.47	-5.91627	-6.4	4.47	5.91627	6.4	1.88452	0.667515	0.648	0.662	0.362	0.512	0.5085	12	5	0	1	0	2	0	0	2	271.36	7.7185	22	2	0	1	0	0	1	0.285714	21	0	0	103.089	41	0	0	0	0	0	0	1	2
Amoxydramine	ZINC000000000932	Benzene and substituted derivatives	Diphenylmethanes	1084	-4.42	-6.60244	-6.6	4.42	6.60244	6.6	2.10185	0.483151	0.677	0.277	0.268	0.615	0.54375	12	5	0	1	0	2	0	0	2	271.36	7.7185	22	2	0	1	0	0	1	0.285714	21	0	0	103.089	41	0	0	0	0	0	0	1	2
Tetriprofen	ZINC000006037100	Phenylpropanoic acids	?	1085	-3.62	-6.93383	-7	3.62	6.93383	7	1.31473	0.91831	0.949	0.151	0.129	0.253	0.396	12	3	0	0	0	2	0	0	2	229.299	6.6701	18	2	0	1	1	0	0	0.166667	18	0	0	86.0255	34	0	0	0	0	0	0	0	2
Tetriprofen	ZINC000006037100	Phenylpropanoic acids	?	1086	-3.56	-6.94914	-6.9	3.56	6.94914	6.9	0.994747	0.682967	0.958	0.146	0.158	0.104	0.331	12	3	0	0	0	2	0	0	2	229.299	6.6701	18	2	0	1	1	0	0	0.166667	18	0	0	86.0255	34	0	0	0	0	0	0	0	2
Tetriprofen	ZINC000006037100	Phenylpropanoic acids	?	1087	-3.3	-6.8215	-6.9	3.3	6.8215	6.9	1.26835	0.623624	0.984	0.191	0.158	0.231	0.401	12	3	0	0	0	2	0	0	2	229.299	6.6701	18	2	0	1	1	0	0	0.166667	18	0	0	86.0255	34	0	0	0	0	0	0	0	2
Nafagrel	ZINC000028762846	Naphthalenes	Naphthalenecarboxylic acids and derivatives	1088	-4.59	-6.82915	-6.8	4.59	6.82915	6.8	3.21678	2.20874	0.581	0.186	0.194	0.972	0.67975	13	2	2	0	0	2	0	0	3	255.297	5.6141	17	4	0	1	1	0	0	0.142857	21	1	0	86.121	34	0	0	0	0	0	0	2	2
Nafagrel	ZINC000028762846	Naphthalenes	Naphthalenecarboxylic acids and derivatives	1089	-4.73	-6.38093	-6.2	4.73	6.38093	6.2	3.1783	1.77096	0.505	0.389	0.474	0.967	0.72825	13	2	2	0	0	2	0	0	3	255.297	5.6141	17	4	0	1	1	0	0	0.142857	21	1	0	86.121	34	0	0	0	0	0	0	2	2
Dexelvucitabine	ZINC000000002300	Nucleoside and nucleotide analogues	?	1090	-4.89	-5.92112	-5.5	4.89	5.92112	5.5	1.36256	0.525862	0.418	0.659	0.852	0.277	0.456	8	1	2	1	1	2	0	0	2	227.195	1.9471	15	6	2	1	0	1	0	0.117647	17	2	0	63.7276	26	1	0	0	0	0	1	3	3
Dexelvucitabine	ZINC000000002300	Nucleoside and nucleotide analogues	?	1091	-5.07	-5.85713	-5.5	5.07	5.85713	5.5	1.34381	0.747531	0.32	0.696	0.852	0.267	0.4265	8	1	2	1	1	2	0	0	2	227.195	1.9471	15	6	2	1	0	1	0	0.117647	17	2	0	63.7276	26	1	0	0	0	0	1	3	3
Dexelvucitabine	ZINC000000002300	Nucleoside and nucleotide analogues	?	1092	-4.93	-6.12834	-5.7	4.93	6.12834	5.7	1.22656	0.346055	0.395	0.538	0.763	0.211	0.395	8	1	2	1	1	2	0	0	2	227.195	1.9471	15	6	2	1	0	1	0	0.117647	17	2	0	63.7276	26	1	0	0	0	0	1	3	3
Cyclazodone	ZINC000000000190	Benzene and substituted derivatives	?	1093	-5.18	-6.59813	-6.6	5.18	6.59813	6.6	0.416835	0.289456	0.264	0.279	0.268	0.006	0.136	12	0	1	1	1	1	0	0	3	216.24	3.443	16	4	1	1	0	0	1	0.166667	18	1	0	68.7676	28	0	0	0	0	0	0	2	2
Cyclazodone	ZINC000000000190	Benzene and substituted derivatives	?	1094	-5.19	-6.56676	-6.6	5.19	6.56676	6.6	0.955174	0.660255	0.259	0.292	0.268	0.093	0.17825	12	0	1	1	1	1	0	0	3	216.24	3.443	16	4	1	1	0	0	1	0.166667	18	1	0	68.7676	28	0	0	0	0	0	0	2	2
Cyclazodone	ZINC000000000190	Benzene and substituted derivatives	?	1095	-4.87	-6.60038	-6.6	4.87	6.60038	6.6	0.831679	0.570944	0.429	0.277	0.268	0.061	0.20475	12	0	1	1	1	1	0	0	3	216.24	3.443	16	4	1	1	0	0	1	0.166667	18	1	0	68.7676	28	0	0	0	0	0	0	2	2
Alclofenac	ZINC000002014875	Phenol ethers	?	1096	-4.3	-5.89669	-5.9	4.3	5.89669	5.9	0.767782	0.0997014	0.738	0.673	0.662	0.045	0.3725	6	5	0	0	0	3	0	0	1	225.651	4.7446	12	3	0	1	1	0	0	0.333333	15	0	0	67.2565	25	1	0	0	1	0	0	0	3
Alclofenac	ZINC000002014875	Phenol ethers	?	1097	-4.08	-5.54426	-5.6	4.08	5.54426	5.6	1.50626	1.00305	0.829	0.841	0.81	0.343	0.58125	6	5	0	0	0	3	0	0	1	225.651	4.7446	12	3	0	1	1	0	0	0.333333	15	0	0	67.2565	25	1	0	0	1	0	0	0	3
Alclofenac	ZINC000002014875	Phenol ethers	?	1098	-4.31	-5.87419	-5.9	4.31	5.87419	5.9	1.88963	0.790451	0.734	0.687	0.662	0.514	0.606	6	5	0	0	0	3	0	0	1	225.651	4.7446	12	3	0	1	1	0	0	0.333333	15	0	0	67.2565	25	1	0	0	1	0	0	0	3
Pentamoxane	ZINC000020137760	Benzodioxanes	Benzo-1,4-dioxanes	1099	-4.74	-6.57793	-6.6	4.74	6.57793	6.6	0.861054	0.53239	0.499	0.289	0.268	0.067	0.22525	8	6	0	1	2	0	0	0	2	235.327	7.6289	23	2	1	0	0	0	1	0.277778	18	1	0	92.3161	38	0	0	0	0	0	0	1	2
Pentamoxane	ZINC000020137760	Benzodioxanes	Benzo-1,4-dioxanes	1100	-5.16	-6.62215	-6.6	5.16	6.62215	6.6	0.465762	0.292528	0.277	0.268	0.268	0.009	0.14075	8	6	0	1	2	0	0	0	2	235.327	7.6289	23	2	1	0	0	0	1	0.277778	18	1	0	92.3161	38	0	0	0	0	0	0	1	2
Pentamoxane	ZINC000020137760	Benzodioxanes	Benzo-1,4-dioxanes	1101	-4.6	-6.40705	-6.4	4.6	6.40705	6.4	0.705383	0.467344	0.575	0.376	0.362	0.036	0.25225	8	6	0	1	2	0	0	0	2	235.327	7.6289	23	2	1	0	0	0	1	0.277778	18	1	0	92.3161	38	0	0	0	0	0	0	1	2
Feprosidnine	ZINC000020805626	Benzene and substituted derivatives	Phenethylamines	1102	-4.67	-6.03065	-5.9	4.67	6.03065	5.9	2.50207	1.51649	0.538	0.593	0.662	0.767	0.6835	8	3	2	1	1	0	0	0	2	204.253	4.2662	16	3	1	0	0	0	0	0.1875	16	1	0	73.2088	29	0	0	0	0	0	0	3	1
Feprosidnine	ZINC000020805626	Benzene and substituted derivatives	Phenethylamines	1103	-4.79	-6.22617	-6	4.79	6.22617	6	2.15359	1.2062	0.474	0.476	0.6	0.637	0.587	8	3	2	1	1	0	0	0	2	204.253	4.2662	16	3	1	0	0	0	0	0.1875	16	1	0	73.2088	29	0	0	0	0	0	0	3	1
Feprosidnine	ZINC000020805626	Benzene and substituted derivatives	Phenethylamines	1104	-4.52	-6.05731	-5.9	4.52	6.05731	5.9	2.16869	0.674045	0.625	0.578	0.662	0.645	0.64425	8	3	2	1	1	0	0	0	2	204.253	4.2662	16	3	1	0	0	0	0	0.1875	16	1	0	73.2088	29	0	0	0	0	0	0	3	1
Etaqualone	ZINC000000001378	Diazanaphthalenes	Benzodiazines	1105	-4.55	-5.3494	-5.4	4.55	5.3494	5.4	1.18723	0.832318	0.608	0.907	0.888	0.191	0.4695	14	3	2	0	0	1	0	0	3	264.328	5.6919	18	3	0	0	0	0	0	0.0909091	22	1	0	98.991	36	0	0	0	0	0	0	2	1
Etaqualone	ZINC000000001378	Diazanaphthalenes	Benzodiazines	1106	-4.65	-5.36547	-5.4	4.65	5.36547	5.4	1.1605	0.816514	0.547	0.903	0.888	0.179	0.44825	14	3	2	0	0	1	0	0	3	264.328	5.6919	18	3	0	0	0	0	0	0.0909091	22	1	0	98.991	36	0	0	0	0	0	0	2	1
Etaqualone	ZINC000000001378	Diazanaphthalenes	Benzodiazines	1107	-3.55	-5.68217	-5.7	3.55	5.68217	5.7	0.659686	0.435175	0.96	0.779	0.763	0.028	0.44475	14	3	2	0	0	1	0	0	3	264.328	5.6919	18	3	0	0	0	0	0	0.0909091	22	1	0	98.991	36	0	0	0	0	0	0	2	1
Lumiracoxib	ZINC000000007563	Benzene and substituted derivatives	Toluenes	1108	-4.69	-5.77158	-5.8	4.69	5.77158	5.8	1.13918	0.794263	0.528	0.738	0.715	0.17	0.39575	12	3	0	1	0	2	0	0	2	292.717	6.4931	14	2	1	2	1	0	0	0.190476	21	0	0	88.1119	32	2	0	0	1	0	1	1	2
Lumiracoxib	ZINC000000007563	Benzene and substituted derivatives	Toluenes	1109	-4.97	-5.83788	-5.8	4.97	5.83788	5.8	1.37584	0.514306	0.372	0.706	0.715	0.283	0.41325	12	3	0	1	0	2	0	0	2	292.717	6.4931	14	2	1	2	1	0	0	0.190476	21	0	0	88.1119	32	2	0	0	1	0	1	1	2
Lumiracoxib	ZINC000000007563	Benzene and substituted derivatives	Toluenes	1110	-4.43	-5.95303	-6	4.43	5.95303	6	1.36857	0.507013	0.669	0.636	0.6	0.28	0.45725	12	3	0	1	0	2	0	0	2	292.717	6.4931	14	2	1	2	1	0	0	0.190476	21	0	0	88.1119	32	2	0	0	1	0	1	1	2
Ibuprofen-piconol	ZINC000001851415	Prenol lipids	Monoterpenoids	1111	-5.28	-7.42644	-7.4	5.28	7.42644	7.4	1.01549	0.692646	0.217	0.043	0.045	0.114	0.1225	11	8	1	0	0	2	0	0	2	297.398	8.0112	26	3	0	0	0	0	0	0.304348	23	1	0	113.094	45	0	0	0	0	0	0	1	2
Ibuprofen-piconol	ZINC000001851415	Prenol lipids	Monoterpenoids	1112	-4.98	-6.60083	-6.7	4.98	6.60083	6.7	1.39838	0.0405024	0.367	0.277	0.229	0.295	0.2965	11	8	1	0	0	2	0	0	2	297.398	8.0112	26	3	0	0	0	0	0	0.304348	23	1	0	113.094	45	0	0	0	0	0	0	1	2
Ibuprofen-piconol	ZINC000001851415	Prenol lipids	Monoterpenoids	1113	-4.75	-6.98248	-6.9	4.75	6.98248	6.9	1.05343	0.645178	0.495	0.138	0.158	0.13	0.22825	11	8	1	0	0	2	0	0	2	297.398	8.0112	26	3	0	0	0	0	0	0.304348	23	1	0	113.094	45	0	0	0	0	0	0	1	2
Mabuterol	ZINC000001846294	Benzene and substituted derivatives	Trifluoromethylbenzenes	1114	-5.27	-7.01397	-6.7	5.27	7.01397	6.7	2.54424	1.13023	0.221	0.125	0.229	0.782	0.5035	6	7	0	2	0	1	0	0	1	310.747	7.1574	20	2	3	1	0	1	1	0.25	20	0	0	94.1997	38	4	0	0	1	0	3	2	1
Mabuterol	ZINC000001846294	Benzene and substituted derivatives	Trifluoromethylbenzenes	1115	-5.97	-6.40695	-6.2	5.97	6.40695	6.2	2.70742	1.56438	0.052	0.376	0.474	0.839	0.551	6	7	0	2	0	1	0	0	1	310.747	7.1574	20	2	3	1	0	1	1	0.25	20	0	0	94.1997	38	4	0	0	1	0	3	2	1
Batabulin	ZINC000002003142	Benzene and substituted derivatives	Sulfanilides	1116	-5.56	-7.94825	-7.9	5.56	7.94825	7.9	1.87828	1.30105	0.123	0.007	0.008	0.507	0.28625	12	1	0	1	0	3	0	1	2	371.258	5.8549	11	4	1	1	0	0	0	0.16	25	0	0	77.1004	31	6	0	0	0	0	6	1	3
Batabulin	ZINC000002003142	Benzene and substituted derivatives	Sulfanilides	1117	-5.87	-6.58404	-6.6	5.87	6.58404	6.6	1.88375	1.27762	0.063	0.286	0.268	0.511	0.33825	12	1	0	1	0	3	0	1	2	371.258	5.8549	11	4	1	1	0	0	0	0.16	25	0	0	77.1004	31	6	0	0	0	0	6	1	3
Batabulin	ZINC000002003142	Benzene and substituted derivatives	Sulfanilides	1118	-5.75	-7.95595	-7.9	5.75	7.95595	7.9	2.12329	1.18824	0.083	0.007	0.008	0.625	0.33525	12	1	0	1	0	3	0	1	2	371.258	5.8549	11	4	1	1	0	0	0	0.16	25	0	0	77.1004	31	6	0	0	0	0	6	1	3
Tofenacin	ZINC000001704297	Benzene and substituted derivatives	Diphenylmethanes	1119	-4.24	-6.10157	-6.3	4.24	6.10157	6.3	1.57161	1.09853	0.764	0.553	0.421	0.372	0.48225	12	5	0	1	0	1	0	0	2	255.361	7.8662	22	1	1	0	0	0	1	0.3	20	0	0	102.529	40	0	0	0	0	0	0	1	1
Tofenacin	ZINC000001704297	Benzene and substituted derivatives	Diphenylmethanes	1120	-4.44	-6.18311	-6.1	4.44	6.18311	6.1	1.89323	1.29491	0.664	0.504	0.538	0.516	0.5585	12	5	0	1	0	1	0	0	2	255.361	7.8662	22	1	1	0	0	0	1	0.3	20	0	0	102.529	40	0	0	0	0	0	0	1	1
Tofenacin	ZINC000001704297	Benzene and substituted derivatives	Diphenylmethanes	1121	-4.08	-5.61794	-5.7	4.08	5.61794	5.7	1.84438	0.556389	0.829	0.813	0.763	0.491	0.6435	12	5	0	1	0	1	0	0	2	255.361	7.8662	22	1	1	0	0	0	1	0.3	20	0	0	102.529	40	0	0	0	0	0	0	1	1
Mefenamic-acid	ZINC000000020241	Benzene and substituted derivatives	Benzoic acids and derivatives	1122	-4.26	-6.68619	-6.5	4.26	6.68619	6.5	0.871703	0.542332	0.756	0.242	0.313	0.072	0.30325	12	3	0	1	0	2	0	0	2	240.282	6.19	16	2	1	2	1	0	0	0.157895	19	0	0	85.6384	32	0	0	0	0	0	0	1	2
Mefenamic-acid	ZINC000000020241	Benzene and substituted derivatives	Benzoic acids and derivatives	1123	-4.21	-6.64131	-6.6	4.21	6.64131	6.6	0.87057	0.593907	0.777	0.264	0.268	0.071	0.29675	12	3	0	1	0	2	0	0	2	240.282	6.19	16	2	1	2	1	0	0	0.157895	19	0	0	85.6384	32	0	0	0	0	0	0	1	2
Mefenamic-acid	ZINC000000020241	Benzene and substituted derivatives	Benzoic acids and derivatives	1124	-4.86	-6.34561	-6.4	4.86	6.34561	6.4	1.30541	0.901346	0.435	0.411	0.362	0.248	0.32325	12	3	0	1	0	2	0	0	2	240.282	6.19	16	2	1	2	1	0	0	0.157895	19	0	0	85.6384	32	0	0	0	0	0	0	1	2
Propenzolate	ZINC000004214202	Piperidines	?	1125	-4.4	-6.18363	-6.1	4.4	6.18363	6.1	2.30706	1.59224	0.688	0.503	0.538	0.695	0.654	17	3	1	0	0	3	0	0	3	331.456	8.5906	32	3	2	2	0	1	1	0.192308	26	1	0	124.631	53	0	0	0	0	0	0	1	3
Propenzolate	ZINC000004214202	Piperidines	?	1126	-4.71	-6.18812	-6.1	4.71	6.18812	6.1	2.39304	1.44491	0.516	0.501	0.538	0.729	0.628	17	3	1	0	0	3	0	0	3	331.456	8.5906	32	3	2	2	0	1	1	0.192308	26	1	0	124.631	53	0	0	0	0	0	0	1	3
Propenzolate	ZINC000004214202	Piperidines	?	1127	-3.74	-6.74512	-6.6	3.74	6.74512	6.6	2.25729	1.49051	0.927	0.221	0.268	0.679	0.63825	17	3	1	0	0	3	0	0	3	331.456	8.5906	32	3	2	2	0	1	1	0.192308	26	1	0	124.631	53	0	0	0	0	0	0	1	3
Mefenidramium	ZINC000000001666	Benzene and substituted derivatives	Diphenylmethanes	1128	-4.44	-6.05343	-6.3	4.44	6.05343	6.3	1.9906	0.405175	0.664	0.58	0.421	0.558	0.55025	12	6	0	1	0	1	0	0	2	270.396	8.6378	25	1	0	0	0	0	1	0.285714	21	0	0	108.757	44	0	0	0	0	0	0	1	1
Mefenidramium	ZINC000000001666	Benzene and substituted derivatives	Diphenylmethanes	1129	-4.31	-6.30269	-6.3	4.31	6.30269	6.3	1.88434	0.575109	0.734	0.434	0.421	0.511	0.54425	12	6	0	1	0	1	0	0	2	270.396	8.6378	25	1	0	0	0	0	1	0.285714	21	0	0	108.757	44	0	0	0	0	0	0	1	1
Mefenidramium	ZINC000000001666	Benzene and substituted derivatives	Diphenylmethanes	1130	-4.7	-6.05965	-6.1	4.7	6.05965	6.1	1.83848	0.541538	0.522	0.577	0.538	0.488	0.509	12	6	0	1	0	1	0	0	2	270.396	8.6378	25	1	0	0	0	0	1	0.285714	21	0	0	108.757	44	0	0	0	0	0	0	1	1
Norletimol	ZINC000100091581	Phenols	1-hydroxy-4-unsubstituted benzenoids	1131	-4.55	-6.61145	-6.3	4.55	6.61145	6.3	0.651663	0.15409	0.608	0.272	0.421	0.026	0.27025	12	2	0	1	0	1	0	0	2	211.264	4.3558	15	2	1	1	0	0	0	0.176471	17	0	0	80.489	29	0	0	0	0	0	0	1	1
Norletimol	ZINC000100091581	Phenols	1-hydroxy-4-unsubstituted benzenoids	1132	-4.48	-6.81471	-6.7	4.48	6.81471	6.7	1.06278	0.449728	0.643	0.194	0.229	0.134	0.285	12	2	0	1	0	1	0	0	2	211.264	4.3558	15	2	1	1	0	0	0	0.176471	17	0	0	80.489	29	0	0	0	0	0	0	1	1
Norletimol	ZINC000100091581	Phenols	1-hydroxy-4-unsubstituted benzenoids	1133	-4.47	-6.82127	-6.6	4.47	6.82127	6.6	0.98371	0.32872	0.648	0.191	0.268	0.101	0.2795	12	2	0	1	0	1	0	0	2	211.264	4.3558	15	2	1	1	0	0	0	0.176471	17	0	0	80.489	29	0	0	0	0	0	0	1	1
Cliprofen	ZINC000006037080	Organooxygen compounds	Carbonyl compounds	1134	-5.16	-6.76037	-6.7	5.16	6.76037	6.7	2.61525	1.36441	0.277	0.213	0.229	0.81	0.5315	10	4	0	0	0	3	0	1	2	293.751	5.5148	12	4	0	1	1	0	0	0.2	20	1	0	84.183	29	1	0	0	1	0	0	0	3
Cliprofen	ZINC000006037080	Organooxygen compounds	Carbonyl compounds	1135	-4.75	-6.81994	-6.8	4.75	6.81994	6.8	2.47077	1.74136	0.495	0.192	0.194	0.758	0.55125	10	4	0	0	0	3	0	1	2	293.751	5.5148	12	4	0	1	1	0	0	0.2	20	1	0	84.183	29	1	0	0	1	0	0	0	3
Cliprofen	ZINC000006037080	Organooxygen compounds	Carbonyl compounds	1136	-4.91	-6.74401	-6.7	4.91	6.74401	6.7	0.882193	0.584237	0.409	0.222	0.229	0.073	0.196	10	4	0	0	0	3	0	1	2	293.751	5.5148	12	4	0	1	1	0	0	0.2	20	1	0	84.183	29	1	0	0	1	0	0	0	3
Tricyclamol	ZINC000001481939	Organonitrogen compounds	Amines	1137	-3.51	-6.14964	-5.9	3.51	6.14964	5.9	2.61465	1.62761	0.965	0.525	0.662	0.809	0.81125	16	4	1	0	0	1	0	0	3	302.482	10.0427	33	1	1	1	0	1	1	0.208333	24	1	0	126.611	54	0	0	0	0	0	0	1	1
Tricyclamol	ZINC000001481939	Organonitrogen compounds	Amines	1138	-3.76	-5.40511	-5.7	3.76	5.40511	5.7	3.00863	1.36485	0.922	0.89	0.763	0.935	0.88875	16	4	1	0	0	1	0	0	3	302.482	10.0427	33	1	1	1	0	1	1	0.208333	24	1	0	126.611	54	0	0	0	0	0	0	1	1
Tricyclamol	ZINC000001481939	Organonitrogen compounds	Amines	1139	-3.13	-5.85596	-5.8	3.13	5.85596	5.8	2.43187	1.55573	0.993	0.697	0.715	0.744	0.799	16	4	1	0	0	1	0	0	3	302.482	10.0427	33	1	1	1	0	1	1	0.208333	24	1	0	126.611	54	0	0	0	0	0	0	1	1
Hexylcaine	ZINC000002034892	Benzene and substituted derivatives	Benzoic acids and derivatives	1140	-5.35	-6.64958	-6.7	5.35	6.64958	6.7	1.03526	0.471602	0.191	0.261	0.229	0.121	0.1655	12	4	0	1	0	2	0	0	2	261.365	8.1476	25	2	1	0	0	0	1	0.3	20	0	0	102.34	42	0	0	0	0	0	0	1	2
Hexylcaine	ZINC000002034892	Benzene and substituted derivatives	Benzoic acids and derivatives	1141	-4.7	-6.58473	-6.6	4.7	6.58473	6.6	1.17875	0.209931	0.522	0.285	0.268	0.189	0.292	12	4	0	1	0	2	0	0	2	261.365	8.1476	25	2	1	0	0	0	1	0.3	20	0	0	102.34	42	0	0	0	0	0	0	1	2
Hexylcaine	ZINC000002034892	Benzene and substituted derivatives	Benzoic acids and derivatives	1142	-5.22	-6.58453	-6.6	5.22	6.58453	6.6	1.28446	0.889934	0.243	0.285	0.268	0.239	0.24725	12	4	0	1	0	2	0	0	2	261.365	8.1476	25	2	1	0	0	0	1	0.3	20	0	0	102.34	42	0	0	0	0	0	0	1	2
Rofelodine	ZINC000031297912	Pyrrolidines	Phenylpyrrolidines	1143	-4.65	-5.98504	-6	4.65	5.98504	6	1.86973	1.28437	0.547	0.617	0.6	0.502	0.53775	13	0	2	0	0	1	0	0	3	214.268	3.9737	17	3	0	0	0	0	1	0.0555556	18	2	0	72.5724	30	0	0	0	0	0	0	2	1
Rofelodine	ZINC000031297912	Pyrrolidines	Phenylpyrrolidines	1144	-4.58	-6.98959	-7	4.58	6.98959	7	1.66557	1.10987	0.587	0.135	0.129	0.411	0.3845	13	0	2	0	0	1	0	0	3	214.268	3.9737	17	3	0	0	0	0	1	0.0555556	18	2	0	72.5724	30	0	0	0	0	0	0	2	1
Rofelodine	ZINC000031297912	Pyrrolidines	Phenylpyrrolidines	1145	-4.92	-6.99241	-7	4.92	6.99241	7	1.54214	0.297713	0.403	0.133	0.129	0.358	0.312	13	0	2	0	0	1	0	0	3	214.268	3.9737	17	3	0	0	0	0	1	0.0555556	18	2	0	72.5724	30	0	0	0	0	0	0	2	1
Brofoxine	ZINC000002016193	Benzoxazines	?	1146	-4.09	-6.21153	-6.2	4.09	6.21153	6.2	1.33173	0.928094	0.826	0.488	0.474	0.259	0.4545	8	2	1	0	1	1	0	0	2	256.099	4.8469	13	3	1	1	0	0	0	0	15	1	0	64.7466	24	1	0	1	0	0	0	1	2
Brofoxine	ZINC000002016193	Benzoxazines	?	1147	-4.79	-5.1926	-5.2	4.79	5.1926	5.2	2.12522	1.47961	0.474	0.938	0.933	0.626	0.66475	8	2	1	0	1	1	0	0	2	256.099	4.8469	13	3	1	1	0	0	0	0	15	1	0	64.7466	24	1	0	1	0	0	0	1	2
Brofoxine	ZINC000002016193	Benzoxazines	?	1148	-4.11	-6.20529	-6.2	4.11	6.20529	6.2	1.33399	0.94238	0.821	0.492	0.474	0.26	0.45375	8	2	1	0	1	1	0	0	2	256.099	4.8469	13	3	1	1	0	0	0	0	15	1	0	64.7466	24	1	0	1	0	0	0	1	2
Prazitone	ZINC000033854762	Diazines	Pyrimidines and pyrimidine derivatives	1149	-4.53	-4.0804	-4.1	4.53	4.0804	4.1	1.50809	1.05215	0.62	0.997	0.996	0.344	0.576	15	1	3	0	0	3	0	0	3	301.346	5.5715	24	5	3	2	0	1	1	0.125	24	2	0	96.3319	41	0	0	0	0	0	0	3	3
Hydralazine	ZINC000012360535	Diazanaphthalenes	Benzodiazines	1150	-4.45	-5.82331	-5.7	4.45	5.82331	5.7	1.25719	0.849415	0.658	0.714	0.763	0.226	0.46825	8	0	2	2	0	0	0	0	2	160.18	2.9463	12	4	2	1	0	0	0	0.0769231	13	1	0	54.9172	20	0	0	0	0	0	0	4	0
Hydralazine	ZINC000012360535	Diazanaphthalenes	Benzodiazines	1151	-4.6	-5.42694	-5.3	4.6	5.42694	5.3	1.86425	0.8757	0.575	0.884	0.912	0.498	0.62075	8	0	2	2	0	0	0	0	2	160.18	2.9463	12	4	2	1	0	0	0	0.0769231	13	1	0	54.9172	20	0	0	0	0	0	0	4	0
Hydralazine	ZINC000012360535	Diazanaphthalenes	Benzodiazines	1152	-4.67	-5.92366	-5.8	4.67	5.92366	5.8	1.59467	0.848281	0.538	0.656	0.715	0.38	0.50325	8	0	2	2	0	0	0	0	2	160.18	2.9463	12	4	2	1	0	0	0	0.0769231	13	1	0	54.9172	20	0	0	0	0	0	0	4	0
Flecainide	ZINC000003830842	Benzene and substituted derivatives	Benzoic acids and derivatives	1153	-6.38	-7.38814	-5.9	6.38	7.38814	5.9	1.91957	0.214969	0.014	0.052	0.662	0.529	0.4335	11	6	1	1	0	3	0	0	2	414.346	9.108	24	4	2	1	0	0	1	0.344828	29	1	0	106.835	48	6	0	0	0	0	6	2	3
Flecainide	ZINC000003830842	Benzene and substituted derivatives	Benzoic acids and derivatives	1154	-6.79	-7.03485	-7.4	6.79	7.03485	7.4	2.42906	1.00459	0.005	0.119	0.045	0.743	0.384	11	6	1	1	0	3	0	0	2	414.346	9.108	24	4	2	1	0	0	1	0.344828	29	1	0	106.835	48	6	0	0	0	0	6	2	3
Nadoxolol	ZINC000004213923	Naphthalenes	?	1155	-5.36	-6.56557	-6.4	5.36	6.56557	6.4	2.18514	1.15416	0.188	0.293	0.362	0.652	0.4635	10	4	0	2	0	3	0	0	2	260.293	5.1761	21	5	3	2	0	1	1	0.25	20	0	0	90.1118	35	0	0	0	0	0	0	2	3
Nadoxolol	ZINC000004213923	Naphthalenes	?	1156	-5.35	-6.49293	-6.3	5.35	6.49293	6.3	1.45578	0.678232	0.191	0.331	0.421	0.319	0.3125	10	4	0	2	0	3	0	0	2	260.293	5.1761	21	5	3	2	0	1	1	0.25	20	0	0	90.1118	35	0	0	0	0	0	0	2	3
Nadoxolol	ZINC000004213923	Naphthalenes	?	1157	-5.51	-6.56915	-6.4	5.51	6.56915	6.4	1.81657	0.8952	0.141	0.291	0.362	0.478	0.36475	10	4	0	2	0	3	0	0	2	260.293	5.1761	21	5	3	2	0	1	1	0.25	20	0	0	90.1118	35	0	0	0	0	0	0	2	3
Dextrofemine	ZINC000001842963	Benzene and substituted derivatives	Phenethylamines	1158	-5.08	-6.34921	-6.4	5.08	6.34921	6.4	1.75371	0.501025	0.315	0.409	0.362	0.451	0.39475	12	6	0	1	0	1	0	0	2	269.388	8.6517	24	1	1	0	0	0	1	0.333333	21	0	0	109.732	43	0	0	0	0	0	0	1	1
Dextrofemine	ZINC000001842963	Benzene and substituted derivatives	Phenethylamines	1159	-4.6	-6.97954	-6.9	4.6	6.97954	6.9	2.21165	1.39169	0.575	0.139	0.158	0.661	0.51375	12	6	0	1	0	1	0	0	2	269.388	8.6517	24	1	1	0	0	0	1	0.333333	21	0	0	109.732	43	0	0	0	0	0	0	1	1
Dextrofemine	ZINC000001842963	Benzene and substituted derivatives	Phenethylamines	1160	-4.5	-6.41064	-6.3	4.5	6.41064	6.3	1.74584	0.213366	0.634	0.373	0.421	0.449	0.48825	12	6	0	1	0	1	0	0	2	269.388	8.6517	24	1	1	0	0	0	1	0.333333	21	0	0	109.732	43	0	0	0	0	0	0	1	1
Difemetorex	ZINC000001481782	Benzene and substituted derivatives	Diphenylmethanes	1161	-4.18	-5.51187	-5.4	4.18	5.51187	5.4	2.06749	0.755148	0.789	0.855	0.888	0.598	0.71825	17	3	1	0	0	1	0	0	3	295.426	8.2699	26	1	2	2	0	1	1	0.208333	24	1	0	116.994	47	0	0	0	0	0	0	1	1
Difemetorex	ZINC000001481782	Benzene and substituted derivatives	Diphenylmethanes	1162	-4.14	-5.40854	-5.3	4.14	5.40854	5.3	0.660864	0.243938	0.806	0.889	0.912	0.028	0.4435	17	3	1	0	0	1	0	0	3	295.426	8.2699	26	1	2	2	0	1	1	0.208333	24	1	0	116.994	47	0	0	0	0	0	0	1	1
Bupropion	ZINC000000057206	Organooxygen compounds	Carbonyl compounds	1163	-4.34	-5.98729	-6	4.34	5.98729	6	0.964334	0.0422007	0.719	0.616	0.6	0.095	0.37725	6	7	0	1	0	1	0	0	1	239.746	6.6981	19	1	1	0	0	0	1	0.25	16	0	0	88.7106	34	1	0	0	1	0	0	1	1
Bupropion	ZINC000000057206	Organooxygen compounds	Carbonyl compounds	1164	-4.34	-5.99848	-6	4.34	5.99848	6	0.665454	0.455296	0.719	0.61	0.6	0.03	0.34475	6	7	0	1	0	1	0	0	1	239.746	6.6981	19	1	1	0	0	0	1	0.25	16	0	0	88.7106	34	1	0	0	1	0	0	1	1
Bupropion	ZINC000000057206	Organooxygen compounds	Carbonyl compounds	1165	-4.68	-6.41763	-6.4	4.68	6.41763	6.4	1.30864	0.875427	0.533	0.371	0.362	0.249	0.34825	6	7	0	1	0	1	0	0	1	239.746	6.6981	19	1	1	0	0	0	1	0.25	16	0	0	88.7106	34	1	0	0	1	0	0	1	1
Nicotredole	ZINC000000004164	Indoles and derivatives	Indoles	1166	-6.09	-7.46117	-7.4	6.09	7.46117	7.4	1.17098	0.797127	0.034	0.039	0.045	0.184	0.11175	13	3	2	1	0	1	0	0	3	265.316	5.6384	18	3	2	2	0	0	0	0.227273	22	2	0	94.0503	35	0	0	0	0	0	0	3	1
Nicotredole	ZINC000000004164	Indoles and derivatives	Indoles	1167	-6.17	-7.21604	-7.2	6.17	7.21604	7.2	1.34329	0.902004	0.027	0.082	0.08	0.266	0.15975	13	3	2	1	0	1	0	0	3	265.316	5.6384	18	3	2	2	0	0	0	0.227273	22	2	0	94.0503	35	0	0	0	0	0	0	3	1
Nicotredole	ZINC000000004164	Indoles and derivatives	Indoles	1168	-5.93	-7.57607	-7.4	5.93	7.57607	7.4	0.815467	0.53846	0.056	0.027	0.045	0.056	0.05325	13	3	2	1	0	1	0	0	3	265.316	5.6384	18	3	2	2	0	0	0	0.227273	22	2	0	94.0503	35	0	0	0	0	0	0	3	1
Flumetramide	ZINC000002029585	Oxazinanes	Morpholines	1169	-4.9	-7.00297	-7	4.9	7.00297	7	1.045	0.0809147	0.413	0.129	0.129	0.126	0.1985	10	1	1	0	1	1	0	0	2	245.2	4.475	13	3	1	1	0	0	0	0.111111	18	1	0	61.0596	27	3	0	0	0	0	3	1	2
Flumetramide	ZINC000002029585	Oxazinanes	Morpholines	1170	-4.62	-7.00357	-7	4.62	7.00357	7	1.26746	0.856128	0.564	0.129	0.129	0.23	0.28825	10	1	1	0	1	1	0	0	2	245.2	4.475	13	3	1	1	0	0	0	0.111111	18	1	0	61.0596	27	3	0	0	0	0	3	1	2
Flumetramide	ZINC000002029585	Oxazinanes	Morpholines	1171	-4.45	-7.00149	-7	4.45	7.00149	7	1.16498	0.792167	0.658	0.129	0.129	0.181	0.28725	10	1	1	0	1	1	0	0	2	245.2	4.475	13	3	1	1	0	0	0	0.111111	18	1	0	61.0596	27	3	0	0	0	0	3	1	2
Pirprofen	ZINC000000000646	Pyrrolines	Phenylpyrrolines	1172	-3.79	-5.39328	-5.4	3.79	5.39328	5.4	1.99626	0.898814	0.915	0.894	0.888	0.561	0.73125	10	3	1	0	0	2	0	0	2	250.705	5.8691	15	3	0	1	1	0	0	0.166667	18	1	0	77.6357	30	1	0	0	1	0	0	1	2
Pirprofen	ZINC000000000646	Pyrrolines	Phenylpyrrolines	1173	-4.51	-5.12161	-5.1	4.51	5.12161	5.1	1.4216	0.493739	0.628	0.948	0.952	0.305	0.5475	10	3	1	0	0	2	0	0	2	250.705	5.8691	15	3	0	1	1	0	0	0.166667	18	1	0	77.6357	30	1	0	0	1	0	0	1	2
Pirprofen	ZINC000000000646	Pyrrolines	Phenylpyrrolines	1174	-4.07	-6.3114	-6.3	4.07	6.3114	6.3	1.67876	1.14471	0.832	0.428	0.421	0.418	0.52225	10	3	1	0	0	2	0	0	2	250.705	5.8691	15	3	0	1	1	0	0	0.166667	18	1	0	77.6357	30	1	0	0	1	0	0	1	2
Camonagrel	ZINC000002016018	Indanes	?	1175	-5.18	-6.82902	-6.8	5.18	6.82902	6.8	3.4511	1.96513	0.264	0.187	0.194	0.988	0.6085	12	3	2	0	0	3	0	0	3	271.296	5.3368	18	5	0	1	1	0	0	0.227273	22	1	0	87.4255	35	0	0	0	0	0	0	2	3
Camonagrel	ZINC000002016018	Indanes	?	1176	-4.85	-6.80367	-6.7	4.85	6.80367	6.7	3.69976	1.85227	0.44	0.197	0.229	0.997	0.66575	12	3	2	0	0	3	0	0	3	271.296	5.3368	18	5	0	1	1	0	0	0.227273	22	1	0	87.4255	35	0	0	0	0	0	0	2	3
Camonagrel	ZINC000002016018	Indanes	?	1177	-4.83	-6.75561	-6.8	4.83	6.75561	6.8	3.65611	2.00431	0.451	0.215	0.194	0.996	0.65925	12	3	2	0	0	3	0	0	3	271.296	5.3368	18	5	0	1	1	0	0	0.227273	22	1	0	87.4255	35	0	0	0	0	0	0	2	3
Etoloxamine	ZINC000000001407	Benzene and substituted derivatives	Diphenylmethanes	1178	-5.95	-7.02532	-7.1	5.95	7.02532	7.1	0.458554	0.186802	0.054	0.121	0.101	0.008	0.04275	12	7	0	1	0	1	0	0	2	283.415	9.154	26	1	1	1	0	0	1	0.363636	22	0	0	117.001	46	0	0	0	0	0	0	1	1
Etoloxamine	ZINC000000001407	Benzene and substituted derivatives	Diphenylmethanes	1179	-5.42	-7.07153	-7.1	5.42	7.07153	7.1	0.960555	0.599407	0.169	0.111	0.101	0.095	0.115	12	7	0	1	0	1	0	0	2	283.415	9.154	26	1	1	1	0	0	1	0.363636	22	0	0	117.001	46	0	0	0	0	0	0	1	1
Etoloxamine	ZINC000000001407	Benzene and substituted derivatives	Diphenylmethanes	1180	-5.5	-5.91236	-5.9	5.5	5.91236	5.9	2.01145	1.31502	0.144	0.664	0.662	0.569	0.486	12	7	0	1	0	1	0	0	2	283.415	9.154	26	1	1	1	0	0	1	0.363636	22	0	0	117.001	46	0	0	0	0	0	0	1	1
Benzalamide	ZINC000002029423	Benzene and substituted derivatives	?	1181	-3.91	-6.38008	-6.4	3.91	6.38008	6.4	1.40449	0.992091	0.885	0.39	0.362	0.297	0.46025	6	5	0	1	0	1	0	0	1	175.231	4.5884	15	2	1	0	0	0	0	0.230769	13	0	0	67.4138	26	0	0	0	0	0	0	1	1
Benzalamide	ZINC000002029423	Benzene and substituted derivatives	?	1182	-3.86	-6.40239	-6.4	3.86	6.40239	6.4	1.5648	1.05107	0.9	0.379	0.362	0.368	0.4995	6	5	0	1	0	1	0	0	1	175.231	4.5884	15	2	1	0	0	0	0	0.230769	13	0	0	67.4138	26	0	0	0	0	0	0	1	1
Benzalamide	ZINC000002029423	Benzene and substituted derivatives	?	1183	-4.08	-6.37432	-6.4	4.08	6.37432	6.4	1.63994	1.1389	0.829	0.393	0.362	0.399	0.49725	6	5	0	1	0	1	0	0	1	175.231	4.5884	15	2	1	0	0	0	0	0.230769	13	0	0	67.4138	26	0	0	0	0	0	0	1	1
Amiflamine	ZINC000029212975	Benzene and substituted derivatives	?	1184	-3.97	-5.69499	-5.6	3.97	5.69499	5.6	3.12401	1.41526	0.868	0.774	0.81	0.959	0.899	6	6	0	2	0	0	0	0	1	192.306	7.0173	21	1	1	0	0	0	0	0.214286	14	0	0	85.1115	34	0	0	0	0	0	0	2	0
Amiflamine	ZINC000029212975	Benzene and substituted derivatives	Phenethylamines	1185	-3.67	-5.09838	-5.1	3.67	5.09838	5.1	2.592	1.53353	0.94	0.952	0.952	0.801	0.8735	6	6	0	2	0	0	0	0	1	192.306	7.0173	21	1	1	0	0	0	0	0.214286	14	0	0	85.1115	34	0	0	0	0	0	0	2	0
Amiflamine	ZINC000029212975	Benzene and substituted derivatives	?	1186	-4.17	-5.49905	-5.4	4.17	5.49905	5.4	3.2479	1.46181	0.794	0.86	0.888	0.976	0.9085	6	6	0	2	0	0	0	0	1	192.306	7.0173	21	1	1	0	0	0	0	0.214286	14	0	0	85.1115	34	0	0	0	0	0	0	2	0
Flerobuterol	ZINC000001999470	Benzene and substituted derivatives	Halobenzenes	1187	-4.16	-6.21914	-6.1	4.16	6.21914	6.1	1.88485	1.03976	0.798	0.482	0.538	0.512	0.59	6	6	0	1	0	1	0	0	1	211.28	5.2785	19	1	2	1	0	1	1	0.266667	15	0	0	79.9299	33	1	0	0	0	0	1	1	1
Flerobuterol	ZINC000001999470	Benzene and substituted derivatives	Halobenzenes	1188	-3.83	-6.13547	-6	3.83	6.13547	6	1.89841	1.04706	0.906	0.532	0.6	0.52	0.6365	6	6	0	1	0	1	0	0	1	211.28	5.2785	19	1	2	1	0	1	1	0.266667	15	0	0	79.9299	33	1	0	0	0	0	1	1	1
Flerobuterol	ZINC000001999470	Benzene and substituted derivatives	Halobenzenes	1189	-3.95	-6.21481	-6.1	3.95	6.21481	6.1	1.97023	1.11325	0.874	0.486	0.538	0.549	0.6275	6	6	0	1	0	1	0	0	1	211.28	5.2785	19	1	2	1	0	1	1	0.266667	15	0	0	79.9299	33	1	0	0	0	0	1	1	1
Cliprofen	ZINC000006037080	Organooxygen compounds	Carbonyl compounds	1190	-4.6	-6.57211	-6.6	4.6	6.57211	6.6	2.30506	1.61953	0.575	0.291	0.268	0.694	0.55775	10	4	0	0	0	3	0	1	2	293.751	5.5148	12	4	0	1	1	0	0	0.2	20	1	0	84.183	29	1	0	0	1	0	0	0	3
Cliprofen	ZINC000006037080	Organooxygen compounds	Carbonyl compounds	1191	-4.81	-5.65791	-5.8	4.81	5.65791	5.8	2.72836	1.89619	0.461	0.791	0.715	0.848	0.718	10	4	0	0	0	3	0	1	2	293.751	5.5148	12	4	0	1	1	0	0	0.2	20	1	0	84.183	29	1	0	0	1	0	0	0	3
Cliprofen	ZINC000006037080	Organooxygen compounds	Carbonyl compounds	1192	-5.03	-6.95756	-7	5.03	6.95756	7	2.25871	1.57965	0.342	0.143	0.129	0.681	0.45825	10	4	0	0	0	3	0	1	2	293.751	5.5148	12	4	0	1	1	0	0	0.2	20	1	0	84.183	29	1	0	0	1	0	0	0	3
Cyclandelate	ZINC000008551998	Benzene and substituted derivatives	?	1193	-4.27	-7.09209	-6.8	4.27	7.09209	6.8	1.71611	0.954891	0.751	0.105	0.194	0.436	0.45425	12	5	0	0	0	3	0	0	2	276.376	7.1937	27	3	1	1	0	1	0	0.190476	21	0	0	105.257	44	0	0	0	0	0	0	0	3
Cyclandelate	ZINC000008551998	Benzene and substituted derivatives	?	1194	-4.22	-6.2065	-6.1	4.22	6.2065	6.1	1.48127	0.943776	0.772	0.492	0.538	0.334	0.4945	12	5	0	0	0	3	0	0	2	276.376	7.1937	27	3	1	1	0	1	0	0.190476	21	0	0	105.257	44	0	0	0	0	0	0	0	3
Cyclandelate	ZINC000008551998	Benzene and substituted derivatives	?	1195	-4.26	-6.31163	-6	4.26	6.31163	6	1.53209	0.917437	0.756	0.427	0.6	0.355	0.5165	12	5	0	0	0	3	0	0	2	276.376	7.1937	27	3	1	1	0	1	0	0.190476	21	0	0	105.257	44	0	0	0	0	0	0	0	3
Naprodoxime	ZINC000006019931	Naphthalenes	?	1196	-4.74	-6.43079	-6.3	4.74	6.43079	6.3	1.84763	1.10729	0.499	0.365	0.421	0.492	0.476	10	3	0	2	0	2	0	0	2	230.267	5.54	18	4	2	1	0	0	1	0.166667	18	0	0	81.691	31	0	0	0	0	0	0	2	2
Naprodoxime	ZINC000006019931	Naphthalenes	?	1197	-4.96	-6.29555	-6.2	4.96	6.29555	6.2	1.55776	0.875376	0.378	0.438	0.474	0.365	0.3955	10	3	0	2	0	2	0	0	2	230.267	5.54	18	4	2	1	0	0	1	0.166667	18	0	0	81.691	31	0	0	0	0	0	0	2	2
Naprodoxime	ZINC000006019931	Naphthalenes	?	1198	-4.51	-6.31241	-6.2	4.51	6.31241	6.2	1.35178	0.636251	0.628	0.427	0.474	0.271	0.411	10	3	0	2	0	2	0	0	2	230.267	5.54	18	4	2	1	0	0	1	0.166667	18	0	0	81.691	31	0	0	0	0	0	0	2	2
Loxoprofen	ZINC000001846128	Phenylpropanoic acids	?	1199	-4.47	-6.69962	-6.7	4.47	6.69962	6.7	2.00773	1.38493	0.648	0.238	0.229	0.566	0.50225	11	4	0	0	0	3	0	0	2	245.298	6.0349	19	3	0	1	1	0	0	0.210526	19	0	0	85.9075	35	0	0	0	0	0	0	0	3
Loxoprofen	ZINC000001846128	Phenylpropanoic acids	?	1200	-4.55	-6.2614	-6.3	4.55	6.2614	6.3	2.31018	1.12411	0.608	0.456	0.421	0.697	0.60575	11	4	0	0	0	3	0	0	2	245.298	6.0349	19	3	0	1	1	0	0	0.210526	19	0	0	85.9075	35	0	0	0	0	0	0	0	3
Loxoprofen	ZINC000001846128	Phenylpropanoic acids	?	1201	-4.39	-6.7049	-6.7	4.39	6.7049	6.7	1.84548	1.26716	0.692	0.235	0.229	0.491	0.47575	11	4	0	0	0	3	0	0	2	245.298	6.0349	19	3	0	1	1	0	0	0.210526	19	0	0	85.9075	35	0	0	0	0	0	0	0	3
Piridocaine	ZINC000001996127	Benzene and substituted derivatives	Benzoic acids and derivatives	1202	-5.71	-6.64591	-6.5	5.71	6.64591	6.5	1.1512	0.732177	0.09	0.262	0.313	0.174	0.18775	11	3	1	1	0	2	0	0	2	248.326	7.1407	23	3	2	0	0	0	1	0.263158	19	1	0	91.2556	38	0	0	0	0	0	0	2	2
Piridocaine	ZINC000001996127	Benzene and substituted derivatives	Benzoic acids and derivatives	1203	-5.24	-6.54926	-6.5	5.24	6.54926	6.5	0.767723	0.272017	0.233	0.301	0.313	0.044	0.1585	11	3	1	1	0	2	0	0	2	248.326	7.1407	23	3	2	0	0	0	1	0.263158	19	1	0	91.2556	38	0	0	0	0	0	0	2	2
Piridocaine	ZINC000001996127	Benzene and substituted derivatives	Benzoic acids and derivatives	1204	-5.82	-6.70464	-6.6	5.82	6.70464	6.6	1.12959	0.588065	0.07	0.236	0.268	0.165	0.167	11	3	1	1	0	2	0	0	2	248.326	7.1407	23	3	2	0	0	0	1	0.263158	19	1	0	91.2556	38	0	0	0	0	0	0	2	2
Metbufen	ZINC000000000474	Organooxygen compounds	Carbonyl compounds	1205	-4.92	-5.95805	-6.3	4.92	5.95805	6.3	3.1088	0.509791	0.403	0.632	0.421	0.956	0.684	12	5	0	0	0	3	0	0	2	267.304	6.1463	17	3	0	1	1	0	0	0.238095	21	0	0	92.178	35	0	0	0	0	0	0	0	3
Metbufen	ZINC000000000474	Organooxygen compounds	Carbonyl compounds	1206	-4.68	-6.28973	-6.4	4.68	6.28973	6.4	2.97442	1.24213	0.533	0.443	0.362	0.925	0.68625	12	5	0	0	0	3	0	0	2	267.304	6.1463	17	3	0	1	1	0	0	0.238095	21	0	0	92.178	35	0	0	0	0	0	0	0	3
Metbufen	ZINC000000000474	Organooxygen compounds	Carbonyl compounds	1207	-4.42	-6.8813	-6.9	4.42	6.8813	6.9	2.3613	0.771709	0.677	0.169	0.158	0.717	0.56725	12	5	0	0	0	3	0	0	2	267.304	6.1463	17	3	0	1	1	0	0	0.238095	21	0	0	92.178	35	0	0	0	0	0	0	0	3
Xenalipin	ZINC000000439311	Benzene and substituted derivatives	Biphenyls and derivatives	1208	-3.77	-5.92137	-5.9	3.77	5.92137	5.9	1.05685	0.5541	0.919	0.659	0.662	0.131	0.46075	12	2	0	0	0	2	0	0	2	265.21	5.3526	9	2	0	1	1	0	0	0.15	20	0	0	70.353	27	3	0	0	0	0	3	0	2
Xenalipin	ZINC000000439311	Benzene and substituted derivatives	Biphenyls and derivatives	1209	-4.04	-6.59255	-6.6	4.04	6.59255	6.6	0.758657	0.141225	0.844	0.281	0.268	0.043	0.2995	12	2	0	0	0	2	0	0	2	265.21	5.3526	9	2	0	1	1	0	0	0.15	20	0	0	70.353	27	3	0	0	0	0	3	0	2
Xenalipin	ZINC000000439311	Benzene and substituted derivatives	Biphenyls and derivatives	1210	-4	-6.58281	-6.6	4	6.58281	6.6	1.27316	0.261804	0.86	0.286	0.268	0.234	0.399	12	2	0	0	0	2	0	0	2	265.21	5.3526	9	2	0	1	1	0	0	0.15	20	0	0	70.353	27	3	0	0	0	0	3	0	2
Benzarone	ZINC000000000071	Organooxygen compounds	Carbonyl compounds	1211	-4.66	-7.55943	-7.4	4.66	7.55943	7.4	2.18752	1.29567	0.543	0.029	0.045	0.653	0.4735	14	3	0	0	1	2	0	0	3	266.296	5.47	16	3	1	1	0	0	0	0.136364	22	1	0	93.0205	34	0	0	0	0	0	0	0	3
Benzarone	ZINC000000000071	Organooxygen compounds	Carbonyl compounds	1212	-4.61	-6.43904	-6.3	4.61	6.43904	6.3	1.8354	1.22351	0.569	0.361	0.421	0.486	0.4905	14	3	0	0	1	2	0	0	3	266.296	5.47	16	3	1	1	0	0	0	0.136364	22	1	0	93.0205	34	0	0	0	0	0	0	0	3
Benzarone	ZINC000000000071	Organooxygen compounds	Carbonyl compounds	1213	-5.24	-7.5941	-7.4	5.24	7.5941	7.4	2.17333	1.30081	0.233	0.026	0.045	0.647	0.393	14	3	0	0	1	2	0	0	3	266.296	5.47	16	3	1	1	0	0	0	0.136364	22	1	0	93.0205	34	0	0	0	0	0	0	0	3
Efetozole	ZINC000017022433	Azoles	Imidazoles	1214	-4.07	-5.63377	-5.6	4.07	5.63377	5.6	0.699541	0.458195	0.832	0.805	0.81	0.035	0.428	9	3	2	0	0	0	0	0	2	186.258	4.8193	15	2	0	0	0	0	0	0.133333	15	1	0	72.547	28	0	0	0	0	0	0	2	0
Efetozole	ZINC000017022433	Azoles	Imidazoles	1215	-3.55	-5.93389	-5.9	3.55	5.93389	5.9	1.3897	0.980648	0.96	0.648	0.662	0.291	0.551	9	3	2	0	0	0	0	0	2	186.258	4.8193	15	2	0	0	0	0	0	0.133333	15	1	0	72.547	28	0	0	0	0	0	0	2	0
Efetozole	ZINC000017022433	Azoles	Imidazoles	1216	-3.96	-5.63354	-5.6	3.96	5.63354	5.6	0.697187	0.47696	0.871	0.806	0.81	0.035	0.43775	9	3	2	0	0	0	0	0	2	186.258	4.8193	15	2	0	0	0	0	0	0.133333	15	1	0	72.547	28	0	0	0	0	0	0	2	0
Cyclandelate	ZINC000008551998	Benzene and substituted derivatives	?	1217	-4.48	-6.47494	-6.3	4.48	6.47494	6.3	1.79598	0.42779	0.643	0.341	0.421	0.467	0.4995	12	5	0	0	0	3	0	0	2	276.376	7.1937	27	3	1	1	0	1	0	0.190476	21	0	0	105.257	44	0	0	0	0	0	0	0	3
Cyclandelate	ZINC000008551998	Benzene and substituted derivatives	?	1218	-4.53	-5.9321	-5.8	4.53	5.9321	5.8	1.50521	1.03316	0.62	0.65	0.715	0.342	0.50475	12	5	0	0	0	3	0	0	2	276.376	7.1937	27	3	1	1	0	1	0	0.190476	21	0	0	105.257	44	0	0	0	0	0	0	0	3
Cyclandelate	ZINC000008551998	Benzene and substituted derivatives	?	1219	-3.76	-5.92021	-5.8	3.76	5.92021	5.8	1.56764	0.954433	0.922	0.66	0.715	0.37	0.59425	12	5	0	0	0	3	0	0	2	276.376	7.1937	27	3	1	1	0	1	0	0.190476	21	0	0	105.257	44	0	0	0	0	0	0	0	3
Salnacedin	ZINC000004217434	Carboxylic acids and derivatives	Amino acids, peptides, and analogues	1220	-5.17	-5.752	-5.7	5.17	5.752	5.7	1.77535	0.737001	0.269	0.748	0.763	0.457	0.4865	6	6	0	1	0	5	0	1	1	282.297	3.499	18	7	2	3	1	0	0	0.368421	19	0	0	81.2374	31	0	0	0	0	0	0	1	5
Salnacedin	ZINC000004217434	Carboxylic acids and derivatives	Amino acids, peptides, and analogues	1221	-5.34	-6.03243	-5.6	5.34	6.03243	5.6	1.90941	0.888822	0.195	0.59	0.81	0.526	0.51425	6	6	0	1	0	5	0	1	1	282.297	3.499	18	7	2	3	1	0	0	0.368421	19	0	0	81.2374	31	0	0	0	0	0	0	1	5
Salnacedin	ZINC000004217434	Carboxylic acids and derivatives	Amino acids, peptides, and analogues	1222	-5.54	-6.23447	-6.1	5.54	6.23447	6.1	1.83001	1.01672	0.13	0.47	0.538	0.483	0.4085	6	6	0	1	0	5	0	1	1	282.297	3.499	18	7	2	3	1	0	0	0.368421	19	0	0	81.2374	31	0	0	0	0	0	0	1	5
Octazamide	ZINC000002002432	Benzene and substituted derivatives	Benzoic acids and derivatives	1223	-4.01	-6.61691	-6.6	4.01	6.61691	6.6	0.450529	0.317724	0.856	0.27	0.268	0.008	0.285	12	1	1	0	1	1	0	0	3	217.268	5.2907	18	3	0	0	0	0	0	0.111111	18	2	0	74.0597	31	0	0	0	0	0	0	1	2
Octazamide	ZINC000002002432	Benzene and substituted derivatives	Benzoic acids and derivatives	1224	-4.04	-6.62535	-6.6	4.04	6.62535	6.6	0.528681	0.338861	0.844	0.267	0.268	0.014	0.285	12	1	1	0	1	1	0	0	3	217.268	5.2907	18	3	0	0	0	0	0	0.111111	18	2	0	74.0597	31	0	0	0	0	0	0	1	2
Octazamide	ZINC000002002432	Benzene and substituted derivatives	Benzoic acids and derivatives	1225	-4.02	-6.61685	-6.6	4.02	6.61685	6.6	0.484522	0.340129	0.852	0.27	0.268	0.01	0.285	12	1	1	0	1	1	0	0	3	217.268	5.2907	18	3	0	0	0	0	0	0.111111	18	2	0	74.0597	31	0	0	0	0	0	0	1	2
Prefenamate	ZINC000000001973	Benzene and substituted derivatives	Benzoic acids and derivatives	1226	-6.01	-7.81219	-7.8	6.01	7.81219	7.8	1.46474	0.286422	0.045	0.014	0.012	0.326	0.17725	12	7	0	1	0	2	0	0	2	349.352	8.5099	21	2	1	1	0	0	0	0.269231	26	0	0	109.953	43	3	0	0	0	0	3	1	2
Prefenamate	ZINC000000001973	Benzene and substituted derivatives	Benzoic acids and derivatives	1227	-6.57	-7.52742	-7.3	6.57	7.52742	7.3	1.24421	0.132496	0.008	0.033	0.061	0.22	0.12725	12	7	0	1	0	2	0	0	2	349.352	8.5099	21	2	1	1	0	0	0	0.269231	26	0	0	109.953	43	3	0	0	0	0	3	1	2
Prefenamate	ZINC000000001973	Benzene and substituted derivatives	Benzoic acids and derivatives	1228	-6.66	-7.79016	-7.8	6.66	7.79016	7.8	2.50336	1.01054	0.006	0.015	0.012	0.768	0.3885	12	7	0	1	0	2	0	0	2	349.352	8.5099	21	2	1	1	0	0	0	0.269231	26	0	0	109.953	43	3	0	0	0	0	3	1	2
Tetriprofen	ZINC000006037100	Phenylpropanoic acids	?	1229	-3.69	-6.37394	-6.4	3.69	6.37394	6.4	0.999715	0.652718	0.936	0.394	0.362	0.107	0.378	12	3	0	0	0	2	0	0	2	229.299	6.6701	18	2	0	1	1	0	0	0.166667	18	0	0	86.0255	34	0	0	0	0	0	0	0	2
Tetriprofen	ZINC000006037100	Phenylpropanoic acids	?	1230	-3.58	-6.365	-6.4	3.58	6.365	6.4	1.13616	0.299173	0.956	0.401	0.362	0.168	0.4135	12	3	0	0	0	2	0	0	2	229.299	6.6701	18	2	0	1	1	0	0	0.166667	18	0	0	86.0255	34	0	0	0	0	0	0	0	2
Tetriprofen	ZINC000006037100	Phenylpropanoic acids	?	1231	-3.43	-7.35592	-7.3	3.43	7.35592	7.3	0.570546	0.372684	0.973	0.057	0.061	0.019	0.268	12	3	0	0	0	2	0	0	2	229.299	6.6701	18	2	0	1	1	0	0	0.166667	18	0	0	86.0255	34	0	0	0	0	0	0	0	2
Amylocaine	ZINC000002034893	Benzene and substituted derivatives	Benzoic acids and derivatives	1232	-3.87	-5.37124	-5.3	3.87	5.37124	5.3	2.27794	1.43932	0.896	0.901	0.912	0.687	0.7955	10	4	1	0	0	2	0	0	2	235.327	6.6237	23	2	1	1	0	0	1	0.352941	17	0	0	92.9522	38	0	0	0	0	0	0	1	2
Amylocaine	ZINC000002034893	Benzene and substituted derivatives	Benzoic acids and derivatives	1233	-3.81	-5.7707	-5.8	3.81	5.7707	5.8	2.5217	1.77569	0.912	0.738	0.715	0.774	0.79375	10	4	1	0	0	2	0	0	2	235.327	6.6237	23	2	1	1	0	0	1	0.352941	17	0	0	92.9522	38	0	0	0	0	0	0	1	2
Amylocaine	ZINC000002034893	Benzene and substituted derivatives	Benzoic acids and derivatives	1234	-3.78	-5.51559	-5.5	3.78	5.51559	5.5	1.56693	0.320145	0.917	0.853	0.852	0.369	0.62675	6	8	0	1	0	2	0	0	1	235.327	6.6237	23	2	1	1	0	0	1	0.352941	17	0	0	92.9522	38	0	0	0	0	0	0	1	2
Fluprofen	ZINC000003598315	Benzene and substituted derivatives	Biphenyls and derivatives	1235	-4.13	-6.7492	-6.8	4.13	6.7492	6.8	0.497873	0.329548	0.812	0.219	0.194	0.012	0.2575	12	3	0	0	0	2	0	0	2	243.257	5.621	13	2	0	1	1	0	0	0.157895	19	0	0	78.9295	30	1	0	0	0	0	1	0	2
Fluprofen	ZINC000003598315	Benzene and substituted derivatives	Biphenyls and derivatives	1236	-3.86	-6.7481	-6.8	3.86	6.7481	6.8	0.546923	0.242278	0.9	0.22	0.194	0.016	0.2815	12	3	0	0	0	2	0	0	2	243.257	5.621	13	2	0	1	1	0	0	0.157895	19	0	0	78.9295	30	1	0	0	0	0	1	0	2
Fluprofen	ZINC000003598315	Benzene and substituted derivatives	Biphenyls and derivatives	1237	-3.9	-7.47396	-7.5	3.9	7.47396	7.5	1.18146	0.334392	0.887	0.038	0.031	0.189	0.324	12	3	0	0	0	2	0	0	2	243.257	5.621	13	2	0	1	1	0	0	0.157895	19	0	0	78.9295	30	1	0	0	0	0	1	0	2
Toloxatone	ZINC000002011566	Benzene and substituted derivatives	Toluenes	1238	-4.32	-6.21429	-6.1	4.32	6.21429	6.1	0.596634	0.0747453	0.729	0.486	0.538	0.021	0.32725	9	2	1	0	1	2	0	0	2	207.229	3.9726	17	4	1	1	0	1	0	0.125	16	1	0	66.83	28	0	0	0	0	0	0	1	3
Toloxatone	ZINC000002011566	Benzene and substituted derivatives	Toluenes	1239	-4.27	-6.21626	-6	4.27	6.21626	6	0.579691	0.134718	0.751	0.484	0.6	0.019	0.34725	9	2	1	0	1	2	0	0	2	207.229	3.9726	17	4	1	1	0	1	0	0.125	16	1	0	66.83	28	0	0	0	0	0	0	1	3
Toloxatone	ZINC000002011566	Benzene and substituted derivatives	Toluenes	1240	-4.26	-6.22295	-6.1	4.26	6.22295	6.1	0.865642	0.108728	0.756	0.479	0.538	0.068	0.3575	9	2	1	0	1	2	0	0	2	207.229	3.9726	17	4	1	1	0	1	0	0.125	16	1	0	66.83	28	0	0	0	0	0	0	1	3
Levofacetoperane	ZINC000032228596	Benzene and substituted derivatives	Benzyloxycarbonyls	1241	-4.41	-6.16506	-6.2	4.41	6.16506	6.2	2.12914	1.49138	0.682	0.516	0.474	0.628	0.603	11	3	1	0	0	2	0	0	2	233.311	6.4064	21	2	1	0	0	0	1	0.222222	18	1	0	85.7613	36	0	0	0	0	0	0	1	2
Levofacetoperane	ZINC000032228596	Benzene and substituted derivatives	Benzyloxycarbonyls	1242	-3.94	-6.1718	-6.2	3.94	6.1718	6.2	2.55628	1.03058	0.877	0.512	0.474	0.785	0.73025	11	3	1	0	0	2	0	0	2	233.311	6.4064	21	2	1	0	0	0	1	0.222222	18	1	0	85.7613	36	0	0	0	0	0	0	1	2
Levofacetoperane	ZINC000032228596	Benzene and substituted derivatives	Benzyloxycarbonyls	1243	-4.21	-6.15613	-6.2	4.21	6.15613	6.2	2.44101	1.65132	0.777	0.522	0.474	0.747	0.68625	11	3	1	0	0	2	0	0	2	233.311	6.4064	21	2	1	0	0	0	1	0.222222	18	1	0	85.7613	36	0	0	0	0	0	0	1	2
Clobenzorex	ZINC000019890803	Benzene and substituted derivatives	Phenethylamines	1244	-4.32	-6.61444	-6.6	4.32	6.61444	6.6	1.19677	0.738358	0.729	0.271	0.268	0.197	0.34775	12	4	0	1	0	0	0	0	2	259.78	7.7803	18	0	1	0	0	0	1	0.263158	19	0	0	98.3171	36	1	0	0	1	0	0	1	0
Clobenzorex	ZINC000019890803	Benzene and substituted derivatives	Phenethylamines	1245	-4.78	-6.84424	-6.8	4.78	6.84424	6.8	0.387435	0.0735293	0.478	0.18	0.194	0.004	0.17	12	4	0	1	0	0	0	0	2	259.78	7.7803	18	0	1	0	0	0	1	0.263158	19	0	0	98.3171	36	1	0	0	1	0	0	1	0
Clobenzorex	ZINC000019890803	Benzene and substituted derivatives	Phenethylamines	1246	-4.72	-6.72062	-6.7	4.72	6.72062	6.7	1.42351	0.28354	0.511	0.23	0.229	0.306	0.338	12	4	0	1	0	0	0	0	2	259.78	7.7803	18	0	1	0	0	0	1	0.263158	19	0	0	98.3171	36	1	0	0	1	0	0	1	0
phenbenzamine	ZINC000000001425	Benzene and substituted derivatives	Phenylmethylamines	1247	-4.54	-5.82964	-5.8	4.54	5.82964	5.8	1.0563	0.699992	0.614	0.71	0.715	0.131	0.39775	12	5	0	2	0	0	0	0	2	254.377	7.9004	23	1	1	1	0	0	1	0.3	20	0	0	106.965	41	0	0	0	0	0	0	2	0
phenbenzamine	ZINC000000001425	Benzene and substituted derivatives	Phenylmethylamines	1248	-5	-5.66398	-5.7	5	5.66398	5.7	1.65423	0.349285	0.359	0.787	0.763	0.404	0.4825	12	5	0	2	0	0	0	0	2	254.377	7.9004	23	1	1	1	0	0	1	0.3	20	0	0	106.965	41	0	0	0	0	0	0	2	0
phenbenzamine	ZINC000000001425	Benzene and substituted derivatives	Phenylmethylamines	1249	-4.95	-5.46734	-5.5	4.95	5.46734	5.5	1.10077	0.765832	0.384	0.868	0.852	0.153	0.3855	12	5	0	2	0	0	0	0	2	254.377	7.9004	23	1	1	1	0	0	1	0.3	20	0	0	106.965	41	0	0	0	0	0	0	2	0
Pentafluranol	ZINC000000000592	Stilbenes	?	1250	-3.87	-7.64643	-7.3	3.87	7.64643	7.3	3.51135	1.87953	0.896	0.023	0.061	0.99	0.73425	12	5	0	0	0	2	0	0	2	346.295	6.3513	17	2	2	2	0	0	0	0.2	25	0	0	95.807	39	5	0	0	0	0	5	0	2
Pentafluranol	ZINC000000000592	Stilbenes	?	1251	-4.02	-6.68213	-6.4	4.02	6.68213	6.4	3.06394	1.53944	0.852	0.244	0.362	0.949	0.778	12	5	0	0	0	2	0	0	2	346.295	6.3513	17	2	2	2	0	0	0	0.2	25	0	0	95.807	39	5	0	0	0	0	5	0	2
Pentafluranol	ZINC000000000592	Stilbenes	?	1252	-4.34	-6.71907	-6.5	4.34	6.71907	6.5	3.4587	2.36394	0.719	0.23	0.313	0.988	0.752	12	5	0	0	0	2	0	0	2	346.295	6.3513	17	2	2	2	0	0	0	0.2	25	0	0	95.807	39	5	0	0	0	0	5	0	2
Dicarbine	ZINC000000518701	Indoles and derivatives	Indolines	1253	-4.67	-7.28257	-7.3	4.67	7.28257	7.3	2.08928	1.47064	0.538	0.069	0.061	0.609	0.45425	11	2	2	0	0	0	0	0	3	202.301	6.5606	19	1	2	2	0	0	1	0	17	2	0	78.0505	33	0	0	0	0	0	0	2	0
Dicarbine	ZINC000000518701	Indoles and derivatives	Indolines	1254	-5.04	-5.62625	-5.6	5.04	5.62625	5.6	1.54707	1.065	0.336	0.81	0.81	0.361	0.467	11	2	2	0	0	0	0	0	3	202.301	6.5606	19	1	2	2	0	0	1	0	17	2	0	78.0505	33	0	0	0	0	0	0	2	0
Dicarbine	ZINC000000518701	Indoles and derivatives	Indolines	1255	-4.68	-7.27722	-7.3	4.68	7.27722	7.3	2.06906	1.45627	0.533	0.069	0.061	0.599	0.448	11	2	2	0	0	0	0	0	3	202.301	6.5606	19	1	2	2	0	0	1	0	17	2	0	78.0505	33	0	0	0	0	0	0	2	0
Padimate-o	ZINC000002016258	Benzene and substituted derivatives	Benzoic acids and derivatives	1256	-4.41	-6.33065	-6	4.41	6.33065	6	1.89102	0.764912	0.682	0.418	0.6	0.515	0.578	6	11	0	1	0	2	0	0	1	277.408	9.3407	30	3	0	0	0	0	0	0.45	20	0	0	114.116	47	0	0	0	0	0	0	1	2
Padimate-o	ZINC000002016258	Benzene and substituted derivatives	Benzoic acids and derivatives	1257	-5.1	-6.18077	-6.3	5.1	6.18077	6.3	1.89361	0.770811	0.304	0.506	0.421	0.517	0.43975	6	11	0	1	0	2	0	0	1	277.408	9.3407	30	3	0	0	0	0	0	0.45	20	0	0	114.116	47	0	0	0	0	0	0	1	2
Padimate-o	ZINC000002016258	Benzene and substituted derivatives	Benzoic acids and derivatives	1258	-5.16	-6.32318	-5.9	5.16	6.32318	5.9	1.7567	0.593986	0.277	0.421	0.662	0.452	0.46075	6	11	0	1	0	2	0	0	1	277.408	9.3407	30	3	0	0	0	0	0	0.45	20	0	0	114.116	47	0	0	0	0	0	0	1	2
Brosuximide	ZINC000095564734	Pyrrolidines	Phenylpyrrolidines	1259	-4.56	-5.96901	-6	4.56	5.96901	6	1.51199	1.01057	0.601	0.626	0.6	0.347	0.47375	10	0	1	0	0	2	0	0	2	254.083	3.1494	11	3	1	1	0	0	0	0.0666667	15	1	0	60.7586	22	1	0	1	0	0	0	1	2
Brosuximide	ZINC000095564734	Pyrrolidines	Phenylpyrrolidines	1260	-4.53	-5.97198	-6	4.53	5.97198	6	1.55647	1.0609	0.62	0.625	0.6	0.365	0.4875	10	0	1	0	0	2	0	0	2	254.083	3.1494	11	3	1	1	0	0	0	0.0666667	15	1	0	60.7586	22	1	0	1	0	0	0	1	2
Brosuximide	ZINC000095564734	Pyrrolidines	Phenylpyrrolidines	1261	-4.52	-6.01275	-6	4.52	6.01275	6	1.20924	0.817087	0.625	0.603	0.6	0.203	0.40775	10	0	1	0	0	2	0	0	2	254.083	3.1494	11	3	1	1	0	0	0	0.0666667	15	1	0	60.7586	22	1	0	1	0	0	0	1	2
Aletamine	ZINC000001678582	Benzene and substituted derivatives	Phenethylamines	1262	-3.82	-5.42219	-5.3	3.82	5.42219	5.3	1.65991	0.548108	0.91	0.885	0.912	0.406	0.6585	6	5	0	1	0	0	0	0	1	161.248	5.6172	15	0	1	0	0	0	0	0.333333	12	0	0	69.7935	27	0	0	0	0	0	0	1	0
Aletamine	ZINC000001678582	Benzene and substituted derivatives	Phenethylamines	1263	-3.86	-5.59793	-5.5	3.86	5.59793	5.5	1.78672	1.13711	0.9	0.822	0.852	0.462	0.669	6	5	0	1	0	0	0	0	1	161.248	5.6172	15	0	1	0	0	0	0	0.333333	12	0	0	69.7935	27	0	0	0	0	0	0	1	0
Aletamine	ZINC000001678582	Benzene and substituted derivatives	Phenethylamines	1264	-4.11	-5.44685	-5.3	4.11	5.44685	5.3	1.658	0.909878	0.821	0.875	0.912	0.406	0.63625	6	5	0	1	0	0	0	0	1	161.248	5.6172	15	0	1	0	0	0	0	0.333333	12	0	0	69.7935	27	0	0	0	0	0	0	1	0
Meso-hexestrol	ZINC000000056549	Stilbenes	?	1265	-4.18	-5.65768	-5.4	4.18	5.65768	5.4	2.65434	1.62982	0.789	0.791	0.888	0.824	0.83125	12	6	0	0	0	2	0	0	2	270.372	6.9232	24	2	2	2	0	0	0	0.238095	21	0	0	107.906	42	0	0	0	0	0	0	0	2
Meso-hexestrol	ZINC000000056549	Stilbenes	?	1266	-3.75	-5.6469	-5.2	3.75	5.6469	5.2	2.64975	1.60355	0.925	0.799	0.933	0.822	0.8755	15	3	0	0	0	2	0	0	3	270.372	6.9232	24	2	2	2	0	0	0	0.238095	21	0	0	107.906	42	0	0	0	0	0	0	0	2
Meso-hexestrol	ZINC000000056549	Stilbenes	?	1267	-4.18	-5.46389	-5.4	4.18	5.46389	5.4	3.06496	1.07855	0.789	0.869	0.888	0.949	0.89375	12	6	0	0	0	2	0	0	2	270.372	6.9232	24	2	2	2	0	0	0	0.238095	21	0	0	107.906	42	0	0	0	0	0	0	0	2
Phenampromide	ZINC000000000604	Benzene and substituted derivatives	Anilides	1268	-4.2	-5.78051	-5.9	4.2	5.78051	5.9	1.05323	0.66814	0.781	0.733	0.662	0.129	0.42525	11	6	1	1	0	1	0	0	2	274.408	8.5389	28	2	1	1	0	0	1	0.285714	21	1	0	111.119	46	0	0	0	0	0	0	2	1
Phenampromide	ZINC000000000604	Benzene and substituted derivatives	Anilides	1269	-5.74	-6.47948	-6.4	5.74	6.47948	6.4	2.11834	1.37787	0.085	0.339	0.362	0.623	0.42325	11	6	1	1	0	1	0	0	2	274.408	8.5389	28	2	1	1	0	0	1	0.285714	21	1	0	111.119	46	0	0	0	0	0	0	2	1
Phenampromide	ZINC000000000604	Benzene and substituted derivatives	Anilides	1270	-3.79	-5.05678	-5	3.79	5.05678	5	2.21406	1.55709	0.915	0.958	0.963	0.662	0.8005	11	6	1	1	0	1	0	0	2	274.408	8.5389	28	2	1	1	0	0	1	0.285714	21	1	0	111.119	46	0	0	0	0	0	0	2	1
Ramelteon	ZINC000000007031	Indanes	?	1271	-5.23	-6.94086	-6.9	5.23	6.94086	6.9	1.16373	0.780101	0.239	0.148	0.158	0.18	0.18925	11	5	0	1	1	1	0	0	3	259.349	7.3804	24	3	1	1	0	0	0	0.238095	21	1	0	97.5504	40	0	0	0	0	0	0	1	2
Ramelteon	ZINC000000007031	Indanes	?	1272	-5.11	-6.92653	-6.9	5.11	6.92653	6.9	0.81048	0.512983	0.3	0.154	0.158	0.054	0.1415	11	5	0	1	1	1	0	0	3	259.349	7.3804	24	3	1	1	0	0	0	0.238095	21	1	0	97.5504	40	0	0	0	0	0	0	1	2
Diethylpropion	ZINC000000000215	Organooxygen compounds	Carbonyl compounds	1273	-3.68	-5.06846	-5.1	3.68	5.06846	5.1	1.56859	1.0713	0.938	0.957	0.952	0.37	0.6575	6	7	0	1	0	1	0	0	1	205.301	6.4052	20	1	1	1	0	0	1	0.333333	15	0	0	84.9082	34	0	0	0	0	0	0	1	1
Diethylpropion	ZINC000000000215	Organooxygen compounds	Carbonyl compounds	1274	-4.45	-5.64906	-5.6	4.45	5.64906	5.6	1.3815	0.904667	0.658	0.797	0.81	0.286	0.51	6	7	0	1	0	1	0	0	1	205.301	6.4052	20	1	1	1	0	0	1	0.333333	15	0	0	84.9082	34	0	0	0	0	0	0	1	1
Diethylpropion	ZINC000000000215	Organooxygen compounds	Carbonyl compounds	1275	-3.96	-5.6572	-5.5	3.96	5.6572	5.5	1.87958	0.813662	0.871	0.792	0.852	0.508	0.68475	6	7	0	1	0	1	0	0	1	205.301	6.4052	20	1	1	1	0	0	1	0.333333	15	0	0	84.9082	34	0	0	0	0	0	0	1	1
Pheniprazine	ZINC000019166939	Benzene and substituted derivatives	Phenethylamines	1276	-4.14	-5.4507	-5.3	4.14	5.4507	5.3	1.87993	1.18117	0.806	0.873	0.912	0.508	0.6835	6	3	0	2	0	0	0	0	1	150.225	4.9247	16	2	2	1	0	0	0	0.272727	11	0	0	61.0462	25	0	0	0	0	0	0	2	0
Pheniprazine	ZINC000019166939	Benzene and substituted derivatives	Phenethylamines	1277	-3.84	-5.39872	-5.3	3.84	5.39872	5.3	2.66393	1.18727	0.905	0.892	0.912	0.827	0.86775	6	3	0	2	0	0	0	0	1	150.225	4.9247	16	2	2	1	0	0	0	0.272727	11	0	0	61.0462	25	0	0	0	0	0	0	2	0
Pheniprazine	ZINC000019166939	Benzene and substituted derivatives	Phenethylamines	1278	-3.98	-5.39348	-5.2	3.98	5.39348	5.2	1.93899	0.731949	0.865	0.894	0.933	0.536	0.7175	6	3	0	2	0	0	0	0	1	150.225	4.9247	16	2	2	1	0	0	0	0.272727	11	0	0	61.0462	25	0	0	0	0	0	0	2	0
Atomoxetine	ZINC000002570822	Phenol ethers	?	1279	-5.12	-5.95637	-5.9	5.12	5.95637	5.9	1.17709	0.793191	0.295	0.633	0.662	0.188	0.33325	12	5	0	1	0	1	0	0	2	255.361	7.9228	22	1	1	0	0	0	1	0.3	20	0	0	102.97	40	0	0	0	0	0	0	1	1
Atomoxetine	ZINC000002570822	Phenol ethers	?	1280	-4.4	-6.34178	-6.4	4.4	6.34178	6.4	1.3457	0.212603	0.688	0.413	0.362	0.267	0.396	12	5	0	1	0	1	0	0	2	255.361	7.9228	22	1	1	0	0	0	1	0.3	20	0	0	102.97	40	0	0	0	0	0	0	1	1
Atomoxetine	ZINC000002570822	Phenol ethers	?	1281	-4.79	-5.92317	-5.9	4.79	5.92317	5.9	1.46906	0.977168	0.474	0.656	0.662	0.329	0.4485	12	5	0	1	0	1	0	0	2	255.361	7.9228	22	1	1	0	0	0	1	0.3	20	0	0	102.97	40	0	0	0	0	0	0	1	1
Pibecarb	ZINC000000001939	Organooxygen compounds	Carbonyl compounds	1282	-4.22	-6.18419	-6.2	4.22	6.18419	6.2	1.38737	0.966906	0.772	0.503	0.474	0.29	0.4565	6	7	0	0	0	3	0	0	1	220.268	5.057	19	3	0	0	0	0	0	0.3125	16	0	0	78.6085	32	0	0	0	0	0	0	0	3
Pibecarb	ZINC000000001939	Organooxygen compounds	Carbonyl compounds	1283	-3.75	-5.99689	-6	3.75	5.99689	6	1.70181	0.445528	0.925	0.611	0.6	0.428	0.59525	6	7	0	0	0	3	0	0	1	220.268	5.057	19	3	0	0	0	0	0	0.3125	16	0	0	78.6085	32	0	0	0	0	0	0	0	3
Pibecarb	ZINC000000001939	Organooxygen compounds	Carbonyl compounds	1284	-3.6	-6.16842	-6.2	3.6	6.16842	6.2	1.78298	0.491607	0.953	0.513	0.474	0.462	0.58775	6	7	0	0	0	3	0	0	1	220.268	5.057	19	3	0	0	0	0	0	0.3125	16	0	0	78.6085	32	0	0	0	0	0	0	0	3
Benzylsulfamide	ZINC000000001022	Benzene and substituted derivatives	Phenylmethylamines	1285	-6.34	-6.71092	-6.6	6.34	6.71092	6.6	2.88553	1.89321	0.016	0.233	0.268	0.901	0.5215	12	1	0	2	0	2	0	1	2	262.334	6.0622	18	4	2	1	0	0	0	0.210526	19	0	0	85.7442	32	0	0	0	0	0	0	2	2
Benzylsulfamide	ZINC000000001022	Benzene and substituted derivatives	Phenylmethylamines	1286	-6.13	-7.66359	-7.5	6.13	7.66359	7.5	2.72808	1.16582	0.03	0.021	0.031	0.848	0.43925	12	1	0	2	0	2	0	1	2	262.334	6.0622	18	4	2	1	0	0	0	0.210526	19	0	0	85.7442	32	0	0	0	0	0	0	2	2
Benzylsulfamide	ZINC000000001022	Benzene and substituted derivatives	Phenylmethylamines	1287	-6.69	-6.00211	-6.6	6.69	6.00211	6.6	3.52787	1.76545	0.005	0.607	0.268	0.991	0.56375	12	1	0	2	0	2	0	1	2	262.334	6.0622	18	4	2	1	0	0	0	0.210526	19	0	0	85.7442	32	0	0	0	0	0	0	2	2
Bropirimine	ZINC000016051409	Diazines	Pyrimidines and pyrimidine derivatives	1288	-5.49	-5.80214	-5.7	5.49	5.80214	5.7	0.929911	0.515783	0.148	0.725	0.763	0.086	0.27075	10	0	2	1	0	1	0	0	2	266.098	3.6204	11	3	2	1	0	0	0	0.0625	16	1	0	70.5712	23	1	0	1	0	0	0	3	1
Bropirimine	ZINC000016051409	Diazines	Pyrimidines and pyrimidine derivatives	1289	-4.72	-6.32976	-6.2	4.72	6.32976	6.2	1.28022	0.712071	0.511	0.419	0.474	0.237	0.36475	10	0	2	1	0	1	0	0	2	266.098	3.6204	11	3	2	1	0	0	0	0.0625	16	1	0	70.5712	23	1	0	1	0	0	0	3	1
Bropirimine	ZINC000016051409	Diazines	Pyrimidines and pyrimidine derivatives	1290	-4.97	-6.29246	-6.2	4.97	6.29246	6.2	1.06754	0.499815	0.372	0.44	0.474	0.137	0.28	10	0	2	1	0	1	0	0	2	266.098	3.6204	11	3	2	1	0	0	0	0.0625	16	1	0	70.5712	23	1	0	1	0	0	0	3	1
Prodolic-acid	ZINC000002008408	Indoles and derivatives	Indolyl carboxylic acids and derivatives	1291	-4.06	-6.37764	-6.3	4.06	6.37764	6.3	2.03601	0.978233	0.836	0.39	0.421	0.581	0.60475	11	5	1	0	1	2	0	0	3	272.324	6.7814	20	3	1	2	1	0	0	0.181818	22	2	0	94.6879	38	0	0	0	0	0	0	1	3
Prodolic-acid	ZINC000002008408	Indoles and derivatives	Indolyl carboxylic acids and derivatives	1292	-3.89	-4.72751	-4.7	3.89	4.72751	4.7	2.16988	1.45991	0.891	0.983	0.985	0.646	0.792	11	5	1	0	1	2	0	0	3	272.324	6.7814	20	3	1	2	1	0	0	0.181818	22	2	0	94.6879	38	0	0	0	0	0	0	1	3
Prodolic-acid	ZINC000002008408	Indoles and derivatives	Indolyl carboxylic acids and derivatives	1293	-4.38	-5.55463	-5.5	4.38	5.55463	5.5	1.99062	1.34397	0.698	0.837	0.852	0.558	0.6665	11	5	1	0	1	2	0	0	3	272.324	6.7814	20	3	1	2	1	0	0	0.181818	22	2	0	94.6879	38	0	0	0	0	0	0	1	3
Phencyclidine	ZINC000000968311	Organonitrogen compounds	Amines	1294	-3.38	-5.45258	-5.4	3.38	5.45258	5.4	1.65369	0.394286	0.98	0.872	0.888	0.404	0.669	17	0	1	0	0	0	0	0	3	243.394	8.747	25	0	1	1	0	0	1	0.1	20	1	0	103.197	43	0	0	0	0	0	0	1	0
Phencyclidine	ZINC000000968311	Organonitrogen compounds	Amines	1295	-2.96	-5.09821	-5.1	2.96	5.09821	5.1	1.17443	0.772925	0.999	0.952	0.952	0.188	0.58175	17	0	1	0	0	0	0	0	3	243.394	8.747	25	0	1	1	0	0	1	0.1	20	1	0	103.197	43	0	0	0	0	0	0	1	0
Phencyclidine	ZINC000000968311	Organonitrogen compounds	Amines	1296	-3.16	-5.44767	-5.4	3.16	5.44767	5.4	1.25137	0.883629	0.991	0.874	0.888	0.224	0.58175	17	0	1	0	0	0	0	0	3	243.394	8.747	25	0	1	1	0	0	1	0.1	20	1	0	103.197	43	0	0	0	0	0	0	1	0
Pirprofen	ZINC000000000646	Pyrrolines	Phenylpyrrolines	1297	-4.25	-5.93753	-5.9	4.25	5.93753	5.9	1.56724	1.09426	0.761	0.645	0.662	0.369	0.54025	10	3	1	0	0	2	0	0	2	250.705	5.8691	15	3	0	1	1	0	0	0.166667	18	1	0	77.6357	30	1	0	0	1	0	0	1	2
Pirprofen	ZINC000000000646	Pyrrolines	Phenylpyrrolines	1298	-3.94	-5.94235	-5.9	3.94	5.94235	5.9	1.79635	1.25436	0.877	0.643	0.662	0.468	0.61875	10	3	1	0	0	2	0	0	2	250.705	5.8691	15	3	0	1	1	0	0	0.166667	18	1	0	77.6357	30	1	0	0	1	0	0	1	2
Pirprofen	ZINC000000000646	Pyrrolines	Phenylpyrrolines	1299	-3.89	-5.94025	-6	3.89	5.94025	6	1.42414	0.98903	0.891	0.643	0.6	0.306	0.52575	10	3	1	0	0	2	0	0	2	250.705	5.8691	15	3	0	1	1	0	0	0.166667	18	1	0	77.6357	30	1	0	0	1	0	0	1	2
Altinicline	ZINC000003826943	Pyridines and derivatives	Pyrrolidinylpyridines	1300	-3.99	-5.72193	-5.7	3.99	5.72193	5.7	2.2587	1.57438	0.862	0.763	0.763	0.681	0.74675	9	3	2	0	0	0	0	0	2	186.258	4.563	15	1	1	1	0	0	1	0.0666667	15	2	0	70.6889	28	0	0	0	0	0	0	2	0
Altinicline	ZINC000003826943	Pyridines and derivatives	Pyrrolidinylpyridines	1301	-3.84	-5.61263	-5.6	3.84	5.61263	5.6	1.98675	1.25037	0.905	0.816	0.81	0.556	0.70675	9	3	2	0	0	0	0	0	2	186.258	4.563	15	1	1	1	0	0	1	0.0666667	15	2	0	70.6889	28	0	0	0	0	0	0	2	0
Altinicline	ZINC000003826943	Pyridines and derivatives	Pyrrolidinylpyridines	1302	-3.76	-5.25914	-5.3	3.76	5.25914	5.3	1.94115	1.34004	0.922	0.922	0.912	0.538	0.7275	9	3	2	0	0	0	0	0	2	186.258	4.563	15	1	1	1	0	0	1	0.0666667	15	2	0	70.6889	28	0	0	0	0	0	0	2	0
Droclidinium	ZINC000001842894	Quinuclidines	?	1303	-4.29	-6.03189	-5.9	4.29	6.03189	5.9	2.59987	1.74126	0.743	0.591	0.662	0.804	0.75325	19	3	1	0	0	3	0	0	4	358.502	9.7582	35	3	1	1	0	1	1	0.172414	29	2	0	135.396	58	0	0	0	0	0	0	1	3
Droclidinium	ZINC000001842894	Quinuclidines	?	1304	-3.36	-6.55919	-6	3.36	6.55919	6	2.01631	1.28072	0.982	0.297	0.6	0.572	0.6815	19	3	1	0	0	3	0	0	4	358.502	9.7582	35	3	1	1	0	1	1	0.172414	29	2	0	135.396	58	0	0	0	0	0	0	1	3
Etomidate	ZINC000000001408	Azoles	Imidazoles	1305	-4.58	-5.67461	-5.7	4.58	5.67461	5.7	3.0388	2.07726	0.587	0.782	0.763	0.942	0.8085	9	5	2	0	0	2	0	0	2	244.294	5.2923	19	4	0	0	0	0	0	0.263158	19	1	0	85.7815	34	0	0	0	0	0	0	2	2
Etomidate	ZINC000000001408	Azoles	Imidazoles	1306	-4.02	-6.29437	-6.3	4.02	6.29437	6.3	0.851224	0.526796	0.852	0.439	0.421	0.065	0.35075	9	5	2	0	0	2	0	0	2	244.294	5.2923	19	4	0	0	0	0	0	0.263158	19	1	0	85.7815	34	0	0	0	0	0	0	2	2
Etomidate	ZINC000000001408	Azoles	Imidazoles	1307	-3.84	-5.86148	-5.9	3.84	5.86148	5.9	2.31604	1.58491	0.905	0.695	0.662	0.699	0.74125	9	5	2	0	0	2	0	0	2	244.294	5.2923	19	4	0	0	0	0	0	0.263158	19	1	0	85.7815	34	0	0	0	0	0	0	2	2
Alprenolol	ZINC000000000023	Phenol ethers	?	1308	-4.63	-6.02309	-5.9	4.63	6.02309	5.9	1.06207	0.533444	0.556	0.598	0.662	0.134	0.3715	6	9	0	1	0	2	0	0	1	249.354	7.1574	25	2	2	1	0	1	1	0.444444	18	0	0	100.851	41	0	0	0	0	0	0	1	2
Alprenolol	ZINC000000000023	Phenol ethers	?	1309	-5.25	-6.20955	-6.1	5.25	6.20955	6.1	2.13143	1.29901	0.228	0.489	0.538	0.63	0.5065	6	9	0	1	0	2	0	0	1	249.354	7.1574	25	2	2	1	0	1	1	0.444444	18	0	0	100.851	41	0	0	0	0	0	0	1	2
Alprenolol	ZINC000000000023	Phenol ethers	?	1310	-4.92	-6.21549	-6.1	4.92	6.21549	6.1	1.99615	1.22267	0.403	0.485	0.538	0.561	0.51575	6	9	0	1	0	2	0	0	1	249.354	7.1574	25	2	2	1	0	1	1	0.444444	18	0	0	100.851	41	0	0	0	0	0	0	1	2
Coumazoline	ZINC000000001218	Benzofurans	?	1311	-5.42	-6.18012	-6.2	5.42	6.18012	6.2	1.53969	1.05199	0.169	0.506	0.474	0.357	0.33925	11	3	2	0	1	0	0	0	3	228.295	5.8031	18	3	1	1	0	0	1	0.157895	19	2	0	81.5358	33	0	0	0	0	0	0	2	1
Coumazoline	ZINC000000001218	Benzofurans	?	1312	-4.7	-6.06091	-6.1	4.7	6.06091	6.1	1.66045	1.14009	0.522	0.577	0.538	0.407	0.4685	11	3	2	0	1	0	0	0	3	228.295	5.8031	18	3	1	1	0	0	1	0.157895	19	2	0	81.5358	33	0	0	0	0	0	0	2	1
Coumazoline	ZINC000000001218	Benzofurans	?	1313	-5.12	-6.18875	-6.2	5.12	6.18875	6.2	1.67619	1.15744	0.295	0.5	0.474	0.416	0.40025	11	3	2	0	1	0	0	0	3	228.295	5.8031	18	3	1	1	0	0	1	0.157895	19	2	0	81.5358	33	0	0	0	0	0	0	2	1
Cicloprofen	ZINC000000000144	Fluorenes	?	1314	-3.89	-7.71585	-7.7	3.89	7.71585	7.7	2.08023	0.973004	0.891	0.018	0.016	0.604	0.52875	13	3	0	0	0	2	0	0	3	237.278	5.7755	14	2	0	1	1	0	0	0.1	20	0	0	83.0395	31	0	0	0	0	0	0	0	2
Cicloprofen	ZINC000000000144	Fluorenes	?	1315	-3.92	-7.70534	-7.7	3.92	7.70534	7.7	1.95145	1.36178	0.883	0.019	0.016	0.541	0.49525	13	3	0	0	0	2	0	0	3	237.278	5.7755	14	2	0	1	1	0	0	0.1	20	0	0	83.0395	31	0	0	0	0	0	0	0	2
Cicloprofen	ZINC000000000144	Fluorenes	?	1316	-4.09	-6.18813	-6.4	4.09	6.18813	6.4	1.724	1.08446	0.826	0.501	0.362	0.439	0.5165	13	3	0	0	0	2	0	0	3	237.278	5.7755	14	2	0	1	1	0	0	0.1	20	0	0	83.0395	31	0	0	0	0	0	0	0	2
Procinolol	ZINC000001567464	Phenol ethers	?	1317	-5.37	-6.12184	-6	5.37	6.12184	6	1.83055	1.22623	0.184	0.541	0.6	0.484	0.438	9	6	0	1	0	2	0	0	2	249.354	7.2768	25	2	2	1	0	1	1	0.368421	19	0	0	99.2109	41	0	0	0	0	0	0	1	2
Procinolol	ZINC000001567464	Phenol ethers	?	1318	-4.53	-5.68344	-5.9	4.53	5.68344	5.9	1.80003	0.9428	0.62	0.778	0.662	0.47	0.5555	9	6	0	1	0	2	0	0	2	249.354	7.2768	25	2	2	1	0	1	1	0.368421	19	0	0	99.2109	41	0	0	0	0	0	0	1	2
Procinolol	ZINC000001567464	Phenol ethers	?	1319	-4.74	-6.0928	-5.7	4.74	6.0928	5.7	1.27011	0.752141	0.499	0.558	0.763	0.232	0.4315	9	6	0	1	0	2	0	0	2	249.354	7.2768	25	2	2	1	0	1	1	0.368421	19	0	0	99.2109	41	0	0	0	0	0	0	1	2
Phenyltoloxamine	ZINC000000001931	Benzene and substituted derivatives	Diphenylmethanes	1320	-5.68	-6.70284	-6.8	5.68	6.70284	6.8	0.31671	0.186373	0.096	0.237	0.194	0.002	0.0735	12	5	0	1	0	1	0	0	2	255.361	7.7404	22	1	1	1	0	0	1	0.3	20	0	0	103.159	40	0	0	0	0	0	0	1	1
Phenyltoloxamine	ZINC000000001931	Benzene and substituted derivatives	Diphenylmethanes	1321	-5.44	-6.72555	-6.7	5.44	6.72555	6.7	1.46882	0.308437	0.162	0.228	0.229	0.329	0.26225	12	5	0	1	0	1	0	0	2	255.361	7.7404	22	1	1	1	0	0	1	0.3	20	0	0	103.159	40	0	0	0	0	0	0	1	1
Phenyltoloxamine	ZINC000000001931	Benzene and substituted derivatives	Diphenylmethanes	1322	-5.36	-6.39857	-6.3	5.36	6.39857	6.3	1.74134	1.11836	0.188	0.382	0.421	0.447	0.37575	12	5	0	1	0	1	0	0	2	255.361	7.7404	22	1	1	1	0	0	1	0.3	20	0	0	103.159	40	0	0	0	0	0	0	1	1
Hexacyprone	ZINC000001846045	Fatty Acyls	Fatty acids and conjugates	1323	-3.07	-5.09749	-5.1	3.07	5.09749	5.1	1.79869	0.494805	0.996	0.953	0.952	0.47	0.722	12	4	0	0	0	3	0	0	2	259.325	6.549	21	3	0	1	1	0	0	0.25	20	0	0	92.4095	38	0	0	0	0	0	0	0	3
Hexacyprone	ZINC000001846045	Fatty Acyls	Fatty acids and conjugates	1324	-3.67	-5.35763	-5.1	3.67	5.35763	5.1	1.97055	0.907558	0.94	0.904	0.952	0.549	0.7475	12	4	0	0	0	3	0	0	2	259.325	6.549	21	3	0	1	1	0	0	0.25	20	0	0	92.4095	38	0	0	0	0	0	0	0	3
Hexacyprone	ZINC000001846045	Fatty Acyls	Fatty acids and conjugates	1325	-3.4	-4.77555	-5	3.4	4.77555	5	1.99878	0.928624	0.978	0.981	0.963	0.562	0.76625	12	4	0	0	0	3	0	0	2	259.325	6.549	21	3	0	1	1	0	0	0.25	20	0	0	92.4095	38	0	0	0	0	0	0	0	3
Piperphenidol	ZINC000000000632	Benzene and substituted derivatives	Phenylbutylamines	1326	-3.87	-6.04161	-5.9	3.87	6.04161	5.9	2.31863	1.40548	0.896	0.587	0.662	0.7	0.7395	11	7	1	0	0	1	0	0	2	275.436	9.1866	30	1	2	2	0	1	1	0.285714	21	1	0	115.963	49	0	0	0	0	0	0	1	1
Piperphenidol	ZINC000000000632	Benzene and substituted derivatives	Phenylbutylamines	1327	-4.23	-6.49001	-6.5	4.23	6.49001	6.5	2.30847	1.18965	0.768	0.332	0.313	0.696	0.61825	11	7	1	0	0	1	0	0	2	275.436	9.1866	30	1	2	2	0	1	1	0.285714	21	1	0	115.963	49	0	0	0	0	0	0	1	1
Piperphenidol	ZINC000000000632	Benzene and substituted derivatives	Phenylbutylamines	1328	-3.81	-6.1413	-6	3.81	6.1413	6	2.02488	1.39587	0.912	0.53	0.6	0.577	0.6665	11	7	1	0	0	1	0	0	2	275.436	9.1866	30	1	2	2	0	1	1	0.285714	21	1	0	115.963	49	0	0	0	0	0	0	1	1
Fenyripol	ZINC000000000306	Diazines	Pyrimidines and pyrimidine derivatives	1329	-4.81	-6.92676	-6.8	4.81	6.92676	6.8	2.34311	1.3975	0.461	0.154	0.194	0.711	0.51925	10	2	2	1	0	1	0	0	2	215.256	3.5084	17	4	2	2	0	1	0	0.235294	17	1	0	75.7782	29	0	0	0	0	0	0	3	1
Fenyripol	ZINC000000000306	Diazines	Pyrimidines and pyrimidine derivatives	1330	-4.86	-6.92612	-6.8	4.86	6.92612	6.8	2.9729	1.94695	0.435	0.155	0.194	0.924	0.61925	10	2	2	1	0	1	0	0	2	215.256	3.5084	17	4	2	2	0	1	0	0.235294	17	1	0	75.7782	29	0	0	0	0	0	0	3	1
Fenyripol	ZINC000000000306	Diazines	Pyrimidines and pyrimidine derivatives	1331	-4.78	-6.92673	-6.8	4.78	6.92673	6.8	2.75628	1.67978	0.478	0.154	0.194	0.862	0.599	10	2	2	1	0	1	0	0	2	215.256	3.5084	17	4	2	2	0	1	0	0.235294	17	1	0	75.7782	29	0	0	0	0	0	0	3	1
Tulobuterol	ZINC000000020236	Benzene and substituted derivatives	Halobenzenes	1332	-4.39	-5.57908	-5.7	4.39	5.57908	5.7	1.89732	1.06392	0.692	0.829	0.763	0.52	0.62375	6	6	0	1	0	1	0	0	1	227.735	5.7928	19	1	2	1	0	1	1	0.266667	15	0	0	84.9819	33	1	0	0	1	0	0	1	1
Tulobuterol	ZINC000000020236	Benzene and substituted derivatives	Halobenzenes	1333	-4.31	-5.78474	-5.7	4.31	5.78474	5.7	1.92042	0.58311	0.734	0.732	0.763	0.53	0.63925	6	6	0	1	0	1	0	0	1	227.735	5.7928	19	1	2	1	0	1	1	0.266667	15	0	0	84.9819	33	1	0	0	1	0	0	1	1
Tulobuterol	ZINC000000020236	Benzene and substituted derivatives	Halobenzenes	1334	-4.17	-5.6087	-5.9	4.17	5.6087	5.9	1.92498	0.503032	0.794	0.818	0.662	0.532	0.63	6	6	0	1	0	1	0	0	1	227.735	5.7928	19	1	2	1	0	1	1	0.266667	15	0	0	84.9819	33	1	0	0	1	0	0	1	1
Clonazoline	ZINC000000001193	Naphthalenes	Chloronaphthalenes	1335	-5.47	-6.218	-6.2	5.47	6.218	6.2	0.490097	0.331104	0.153	0.483	0.474	0.011	0.16225	13	1	2	0	0	0	0	0	3	244.725	5.595	15	2	1	1	0	0	1	0.105263	19	1	0	81.3358	30	1	0	0	1	0	0	2	0
Clonazoline	ZINC000000001193	Naphthalenes	Chloronaphthalenes	1336	-4.88	-6.25445	-6.2	4.88	6.25445	6.2	1.53369	1.05823	0.422	0.461	0.474	0.355	0.4015	13	1	2	0	0	0	0	0	3	244.725	5.595	15	2	1	1	0	0	1	0.105263	19	1	0	81.3358	30	1	0	0	1	0	0	2	0
Clonazoline	ZINC000000001193	Naphthalenes	Chloronaphthalenes	1337	-4.57	-6.84269	-6.8	4.57	6.84269	6.8	2.03626	1.40407	0.595	0.18	0.194	0.581	0.48775	13	1	2	0	0	0	0	0	3	244.725	5.595	15	2	1	1	0	0	1	0.105263	19	1	0	81.3358	30	1	0	0	1	0	0	2	0
Furfenorex	ZINC000031544973	Benzene and substituted derivatives	Phenethylamines	1338	-3.78	-6.14459	-6.1	3.78	6.14459	6.1	1.87461	1.30452	0.917	0.527	0.538	0.504	0.61575	10	5	0	1	1	0	0	0	2	229.323	7.1213	19	1	1	1	0	0	1	0.277778	18	1	0	91.6257	36	0	0	0	0	0	0	1	1
Furfenorex	ZINC000031544973	Benzene and substituted derivatives	Phenethylamines	1339	-3.74	-6.22767	-6.2	3.74	6.22767	6.2	1.89283	1.32052	0.927	0.475	0.474	0.516	0.60825	10	5	0	1	1	0	0	0	2	229.323	7.1213	19	1	1	1	0	0	1	0.277778	18	1	0	91.6257	36	0	0	0	0	0	0	1	1
Furfenorex	ZINC000031544973	Benzene and substituted derivatives	Phenethylamines	1340	-4.14	-6.60537	-6.6	4.14	6.60537	6.6	2.1826	1.53635	0.806	0.275	0.268	0.65	0.5935	10	5	0	1	1	0	0	0	2	229.323	7.1213	19	1	1	1	0	0	1	0.277778	18	1	0	91.6257	36	0	0	0	0	0	0	1	1
Cetoxime	ZINC000004215288	Benzene and substituted derivatives	Phenylmethylamines	1341	-4.63	-5.658	-5.5	4.63	5.658	5.5	2.40486	0.675411	0.556	0.791	0.852	0.734	0.719	12	3	0	3	0	1	0	0	2	255.321	6.1892	21	4	2	1	0	0	1	0.25	20	0	0	94.751	36	0	0	0	0	0	0	3	1
Cetoxime	ZINC000004215288	Benzene and substituted derivatives	Phenylmethylamines	1342	-4.84	-5.71765	-5.6	4.84	5.71765	5.6	2.11452	1.35243	0.446	0.765	0.81	0.621	0.6245	12	3	0	3	0	1	0	0	2	255.321	6.1892	21	4	2	1	0	0	1	0.25	20	0	0	94.751	36	0	0	0	0	0	0	3	1
Cetoxime	ZINC000004215288	Benzene and substituted derivatives	Phenylmethylamines	1343	-5.1	-5.73357	-5.6	5.1	5.73357	5.6	1.99118	1.26861	0.304	0.756	0.81	0.559	0.558	12	3	0	3	0	1	0	0	2	255.321	6.1892	21	4	2	1	0	0	1	0.25	20	0	0	94.751	36	0	0	0	0	0	0	3	1
Alphameprodine	ZINC000001850976	Piperidines	Phenylpiperidines	1344	-3.54	-4.48754	-4.5	3.54	4.48754	4.5	2.10765	1.47585	0.961	0.991	0.99	0.618	0.79675	11	6	1	0	0	2	0	0	2	275.392	8.0329	27	2	1	1	0	0	1	0.238095	21	1	0	106.596	45	0	0	0	0	0	0	1	2
Alphameprodine	ZINC000001850976	Piperidines	Phenylpiperidines	1345	-3.58	-2.80267	-2.8	3.58	2.80267	2.8	2.3752	1.58135	0.956	1	1	0.721	0.8495	11	6	1	0	0	2	0	0	2	275.392	8.0329	27	2	1	1	0	0	1	0.238095	21	1	0	106.596	45	0	0	0	0	0	0	1	2
Alphameprodine	ZINC000001850976	Piperidines	Phenylpiperidines	1346	-3.12	-4.40756	-4.4	3.12	4.40756	4.4	2.38326	1.65004	0.993	0.992	0.994	0.725	0.85925	11	6	1	0	0	2	0	0	2	275.392	8.0329	27	2	1	1	0	0	1	0.238095	21	1	0	106.596	45	0	0	0	0	0	0	1	2
Losmiprofen	ZINC000000000433	Benzene and substituted derivatives	Benzophenones	1347	-5.9	-7.25569	-7.2	5.9	7.25569	7.2	1.26313	0.225673	0.06	0.074	0.08	0.228	0.149	12	5	0	0	0	4	0	0	2	317.748	6.3722	17	4	0	1	1	0	0	0.217391	23	0	0	97.026	36	1	0	0	1	0	0	0	4
Losmiprofen	ZINC000000000433	Benzene and substituted derivatives	Benzophenones	1348	-3.91	-6.88229	-6.9	3.91	6.88229	6.9	1.12242	0.773984	0.885	0.168	0.158	0.16	0.34075	12	5	0	0	0	4	0	0	2	317.748	6.3722	17	4	0	1	1	0	0	0.217391	23	0	0	97.026	36	1	0	0	1	0	0	0	4
Losmiprofen	ZINC000000000433	Benzene and substituted derivatives	Benzophenones	1349	-5.51	-7.25696	-7	5.51	7.25696	7	0.694165	0.409781	0.141	0.073	0.129	0.034	0.0845	12	5	0	0	0	4	0	0	2	317.748	6.3722	17	4	0	1	1	0	0	0.217391	23	0	0	97.026	36	1	0	0	1	0	0	0	4
Amiflamine	ZINC000029212975	Benzene and substituted derivatives	?	1350	-4.29	-5.92406	-5.8	4.29	5.92406	5.8	2.98175	1.64611	0.743	0.655	0.715	0.927	0.828	6	6	0	2	0	0	0	0	1	192.306	7.0173	21	1	1	0	0	0	0	0.214286	14	0	0	85.1115	34	0	0	0	0	0	0	2	0
Amiflamine	ZINC000029212975	Benzene and substituted derivatives	?	1351	-4	-5.91452	-5.7	4	5.91452	5.7	2.83007	0.953914	0.86	0.664	0.763	0.886	0.84875	6	6	0	2	0	0	0	0	1	192.306	7.0173	21	1	1	0	0	0	0	0.214286	14	0	0	85.1115	34	0	0	0	0	0	0	2	0
Amiflamine	ZINC000029212975	Benzene and substituted derivatives	?	1352	-4.16	-5.92343	-5.8	4.16	5.92343	5.8	2.78631	1.94731	0.798	0.656	0.715	0.871	0.81375	6	6	0	2	0	0	0	0	1	192.306	7.0173	21	1	1	0	0	0	0	0.214286	14	0	0	85.1115	34	0	0	0	0	0	0	2	0
Seclazone	ZINC000002011672	Benzoxazines	?	1353	-4.03	-6.25772	-6.3	4.03	6.25772	6.3	1.4187	0.989201	0.847	0.459	0.421	0.304	0.469	10	0	1	0	2	1	0	0	3	225.631	3.6668	12	4	0	0	0	0	0	0	17	2	0	58.9347	23	1	0	0	1	0	0	1	3
Seclazone	ZINC000002011672	Benzoxazines	?	1354	-4.32	-5.83134	-5.8	4.32	5.83134	5.8	1.52332	1.06625	0.729	0.709	0.715	0.351	0.5365	10	0	1	0	2	1	0	0	3	225.631	3.6668	12	4	0	0	0	0	0	0	17	2	0	58.9347	23	1	0	0	1	0	0	1	3
Seclazone	ZINC000002011672	Benzoxazines	?	1355	-4.31	-5.92239	-6	4.31	5.92239	6	1.46483	0.891047	0.734	0.658	0.6	0.326	0.4965	10	0	1	0	2	1	0	0	3	225.631	3.6668	12	4	0	0	0	0	0	0	17	2	0	58.9347	23	1	0	0	1	0	0	1	3
Bicifadine	ZINC000005781680	Piperidines	Phenylpiperidines	1356	-3.61	-6.72462	-6.7	3.61	6.72462	6.7	0.860779	0.552197	0.951	0.228	0.229	0.067	0.3285	11	1	1	0	0	0	0	0	3	173.259	5.3733	15	0	1	0	0	0	1	0.0666667	15	1	0	68.5623	28	0	0	0	0	0	0	1	0
Bicifadine	ZINC000005781680	Piperidines	Phenylpiperidines	1357	-3.76	-6.73266	-6.7	3.76	6.73266	6.7	1.31696	0.912225	0.922	0.226	0.229	0.254	0.41475	11	1	1	0	0	0	0	0	3	173.259	5.3733	15	0	1	0	0	0	1	0.0666667	15	1	0	68.5623	28	0	0	0	0	0	0	1	0
Bicifadine	ZINC000005781680	Piperidines	Phenylpiperidines	1358	-3.89	-5.84464	-5.9	3.89	5.84464	5.9	1.28431	0.875202	0.891	0.703	0.662	0.239	0.50775	11	1	1	0	0	0	0	0	3	173.259	5.3733	15	0	1	0	0	0	1	0.0666667	15	1	0	68.5623	28	0	0	0	0	0	0	1	0
Alifedrine	ZINC000001999497	Benzene and substituted derivatives	Phenylpropanes	1359	-5.87	-7.57158	-7.4	5.87	7.57158	7.4	1.37015	0.865108	0.063	0.028	0.045	0.28	0.167	12	6	0	1	0	2	0	0	2	289.419	8.2934	29	2	2	1	0	1	1	0.318182	22	0	0	116.375	48	0	0	0	0	0	0	1	2
Alifedrine	ZINC000001999497	Benzene and substituted derivatives	Phenylpropanes	1360	-6.41	-7.59423	-7.4	6.41	7.59423	7.4	1.2915	0.68649	0.013	0.026	0.045	0.243	0.136	12	6	0	1	0	2	0	0	2	289.419	8.2934	29	2	2	1	0	1	1	0.318182	22	0	0	116.375	48	0	0	0	0	0	0	1	2
Alifedrine	ZINC000001999497	Benzene and substituted derivatives	Phenylpropanes	1361	-6.18	-7.59503	-7.4	6.18	7.59503	7.4	1.5664	0.851105	0.026	0.026	0.045	0.369	0.20225	12	6	0	1	0	2	0	0	2	289.419	8.2934	29	2	2	1	0	1	1	0.318182	22	0	0	116.375	48	0	0	0	0	0	0	1	2
Triflocin	ZINC000030691313	Benzene and substituted derivatives	Trifluoromethylbenzenes	1362	-5.09	-7.27302	-7.3	5.09	7.27302	7.3	1.31603	0.917291	0.31	0.071	0.061	0.254	0.21975	11	2	1	1	0	2	0	0	2	281.213	4.9884	11	3	1	2	1	0	0	0.190476	21	1	0	72.1614	28	3	0	0	0	0	3	2	2
Triflocin	ZINC000030691313	Benzene and substituted derivatives	Trifluoromethylbenzenes	1363	-5.14	-6.9169	-6.9	5.14	6.9169	6.9	0.486431	0.221489	0.285	0.157	0.158	0.011	0.11625	11	2	1	1	0	2	0	0	2	281.213	4.9884	11	3	1	2	1	0	0	0.190476	21	1	0	72.1614	28	3	0	0	0	0	3	2	2
Triflocin	ZINC000030691313	Benzene and substituted derivatives	Trifluoromethylbenzenes	1364	-5.23	-7.30156	-7.3	5.23	7.30156	7.3	0.949637	0.0755834	0.239	0.065	0.061	0.092	0.121	11	2	1	1	0	2	0	0	2	281.213	4.9884	11	3	1	2	1	0	0	0.190476	21	1	0	72.1614	28	3	0	0	0	0	3	2	2
Butofilolol	ZINC000001846206	Organooxygen compounds	Carbonyl compounds	1365	-4.85	-6.49319	-6.4	4.85	6.49319	6.4	1.52227	0.45384	0.44	0.331	0.362	0.351	0.376	6	11	0	1	0	3	0	0	1	311.397	7.9064	29	3	2	1	0	1	1	0.409091	22	0	0	114.527	48	1	0	0	0	0	1	1	3
Butofilolol	ZINC000001846206	Organooxygen compounds	Carbonyl compounds	1366	-5.02	-6.46764	-6.3	5.02	6.46764	6.3	1.04232	0.489329	0.346	0.345	0.421	0.125	0.25425	6	11	0	1	0	3	0	0	1	311.397	7.9064	29	3	2	1	0	1	1	0.409091	22	0	0	114.527	48	1	0	0	0	0	1	1	3
Butofilolol	ZINC000001846206	Organooxygen compounds	Carbonyl compounds	1367	-5.8	-6.1616	-6	5.8	6.1616	6	1.33974	0.318929	0.073	0.517	0.6	0.264	0.30025	6	11	0	1	0	3	0	0	1	311.397	7.9064	29	3	2	1	0	1	1	0.409091	22	0	0	114.527	48	1	0	0	0	0	1	1	3
Metoprine	ZINC000000001723	Benzene and substituted derivatives	Halobenzenes	1368	-5.77	-7.09977	-7.3	5.77	7.09977	7.3	2.16618	1.35423	0.079	0.103	0.061	0.644	0.357	10	1	2	2	0	0	0	0	2	269.135	5.8107	14	4	2	0	0	0	0	0.0555556	18	1	0	81.4556	27	2	0	0	2	0	0	4	0
Metoprine	ZINC000000001723	Benzene and substituted derivatives	Halobenzenes	1369	-5.54	-7.12258	-6.8	5.54	7.12258	6.8	2.2373	1.26633	0.13	0.099	0.194	0.671	0.4165	10	1	2	2	0	0	0	0	2	269.135	5.8107	14	4	2	0	0	0	0	0.0555556	18	1	0	81.4556	27	2	0	0	2	0	0	4	0
Fenpentadiol	ZINC000003830834	Benzene and substituted derivatives	Halobenzenes	1370	-4.24	-5.42983	-5.2	4.24	5.42983	5.2	1.87576	0.907414	0.764	0.883	0.933	0.505	0.67675	6	6	0	0	0	2	0	0	1	228.719	4.3009	19	2	2	2	0	2	0	0.2	15	0	0	81.3426	32	1	0	0	1	0	0	0	2
Fenpentadiol	ZINC000003830834	Benzene and substituted derivatives	Halobenzenes	1371	-4.13	-5.27359	-5.2	4.13	5.27359	5.2	2.1358	0.316298	0.812	0.921	0.933	0.63	0.75125	6	6	0	0	0	2	0	0	1	228.719	4.3009	19	2	2	2	0	2	0	0.2	15	0	0	81.3426	32	1	0	0	1	0	0	0	2
Fenpentadiol	ZINC000003830834	Benzene and substituted derivatives	Halobenzenes	1372	-4.33	-5.38977	-5.2	4.33	5.38977	5.2	1.77957	0.953151	0.724	0.896	0.933	0.46	0.64425	6	6	0	0	0	2	0	0	1	228.719	4.3009	19	2	2	2	0	2	0	0.2	15	0	0	81.3426	32	1	0	0	1	0	0	0	2
Prilocaine	ZINC000001530816	Carboxylic acids and derivatives	Amino acids, peptides, and analogues	1373	-4.56	-5.92399	-5.9	4.56	5.92399	5.9	2.10195	1.40013	0.601	0.656	0.662	0.615	0.62325	6	7	0	2	0	1	0	0	1	220.316	6.6085	22	2	2	1	0	0	1	0.375	16	0	0	89.9595	36	0	0	0	0	0	0	2	1
Prilocaine	ZINC000001530816	Carboxylic acids and derivatives	Amino acids, peptides, and analogues	1374	-4.6	-5.96799	-6	4.6	5.96799	6	1.8433	1.28151	0.575	0.627	0.6	0.49	0.53875	6	7	0	2	0	1	0	0	1	220.316	6.6085	22	2	2	1	0	0	1	0.375	16	0	0	89.9595	36	0	0	0	0	0	0	2	1
Prilocaine	ZINC000001530816	Carboxylic acids and derivatives	Amino acids, peptides, and analogues	1375	-4.88	-5.95075	-5.9	4.88	5.95075	5.9	1.97028	1.34288	0.422	0.638	0.662	0.549	0.5455	6	7	0	2	0	1	0	0	1	220.316	6.6085	22	2	2	1	0	0	1	0.375	16	0	0	89.9595	36	0	0	0	0	0	0	2	1
Eslicarbazepine-acetate	ZINC000000023896	Benzazepines	Dibenzazepines	1376	-5.15	-4.85582	-4.9	5.15	4.85582	4.9	2.11408	1.44229	0.281	0.975	0.97	0.621	0.62325	14	3	1	1	0	3	0	0	3	296.326	6.412	21	4	1	0	0	0	0	0.125	24	1	0	96.424	38	0	0	0	0	0	0	2	3
Eslicarbazepine-acetate	ZINC000000023896	Benzazepines	Dibenzazepines	1377	-4.22	-6.42328	-6.3	4.22	6.42328	6.3	2.59711	1.82282	0.772	0.368	0.421	0.803	0.69975	14	3	1	1	0	3	0	0	3	296.326	6.412	21	4	1	0	0	0	0	0.125	24	1	0	96.424	38	0	0	0	0	0	0	2	3
Metaxalone	ZINC000000000471	Phenol ethers	?	1378	-4.65	-6.08173	-6.1	4.65	6.08173	6.1	0.900535	0.593251	0.547	0.565	0.538	0.077	0.30975	9	3	1	0	1	2	0	0	2	221.256	5.5727	19	4	1	1	0	0	0	0.176471	17	1	0	73.1896	31	0	0	0	0	0	0	1	3
Metaxalone	ZINC000000000471	Phenol ethers	?	1379	-4.62	-6.08207	-6	4.62	6.08207	6	0.905209	0.563794	0.564	0.564	0.6	0.079	0.3305	9	3	1	0	1	2	0	0	2	221.256	5.5727	19	4	1	1	0	0	0	0.176471	17	1	0	73.1896	31	0	0	0	0	0	0	1	3
Metaxalone	ZINC000000000471	Phenol ethers	?	1380	-4.61	-6.12103	-6.1	4.61	6.12103	6.1	1.07264	0.730966	0.569	0.541	0.538	0.138	0.34575	9	3	1	0	1	2	0	0	2	221.256	5.5727	19	4	1	1	0	0	0	0.176471	17	1	0	73.1896	31	0	0	0	0	0	0	1	3
Triprolidine	ZINC000012503099	Benzene and substituted derivatives	Styrenes	1381	-4.9	-6.81055	-6.8	4.9	6.81055	6.8	0.913109	0.587005	0.413	0.195	0.194	0.082	0.19275	15	4	2	0	0	0	0	0	3	278.399	8.088	23	1	1	1	0	0	1	0.173913	23	2	0	110.595	43	0	0	0	0	0	0	2	0
Triprolidine	ZINC000012503099	Benzene and substituted derivatives	Styrenes	1382	-6.18	-7.04892	-7.1	6.18	7.04892	7.1	0.98697	0.574596	0.026	0.115	0.101	0.103	0.08325	15	4	2	0	0	0	0	0	3	278.399	8.088	23	1	1	1	0	0	1	0.173913	23	2	0	110.595	43	0	0	0	0	0	0	2	0
Triprolidine	ZINC000012503099	Benzene and substituted derivatives	Styrenes	1383	-5.48	-7.08338	-7.1	5.48	7.08338	7.1	1.24981	0.201869	0.152	0.107	0.101	0.223	0.17475	15	4	2	0	0	0	0	0	3	278.399	8.088	23	1	1	1	0	0	1	0.173913	23	2	0	110.595	43	0	0	0	0	0	0	2	0
Tiflorex	ZINC000000000772	Benzene and substituted derivatives	Phenethylamines	1384	-5.18	-6.24867	-6.1	5.18	6.24867	6.1	2.82424	1.31665	0.264	0.463	0.538	0.884	0.6425	6	6	0	1	0	0	0	1	1	263.328	7.5351	17	1	1	0	0	0	1	0.352941	17	0	0	83.4251	33	3	0	0	0	0	3	1	0
Tiflorex	ZINC000000000772	Benzene and substituted derivatives	Phenethylamines	1385	-4.4	-5.73575	-5.6	4.4	5.73575	5.6	1.19296	0.809404	0.688	0.754	0.81	0.195	0.472	6	6	0	1	0	0	0	1	1	263.328	7.5351	17	1	1	0	0	0	1	0.352941	17	0	0	83.4251	33	3	0	0	0	0	3	1	0
Tiflorex	ZINC000000000772	Benzene and substituted derivatives	Phenethylamines	1386	-4.86	-6.26059	-6.3	4.86	6.26059	6.3	1.13678	0.77105	0.435	0.457	0.421	0.168	0.298	6	6	0	1	0	0	0	1	1	263.328	7.5351	17	1	1	0	0	0	1	0.352941	17	0	0	83.4251	33	3	0	0	0	0	3	1	0
Bifemelane	ZINC000001542896	Benzene and substituted derivatives	Diphenylmethanes	1387	-4.85	-6.51285	-6.5	4.85	6.51285	6.5	1.44903	0.295981	0.44	0.32	0.313	0.317	0.34675	12	6	0	1	0	1	0	0	2	269.388	8.6296	24	1	1	0	0	0	1	0.380952	21	0	0	109.891	43	0	0	0	0	0	0	1	1
Bifemelane	ZINC000001542896	Benzene and substituted derivatives	Diphenylmethanes	1388	-5.13	-6.51286	-6.5	5.13	6.51286	6.5	1.98003	1.29183	0.29	0.32	0.313	0.553	0.42725	12	6	0	1	0	1	0	0	2	269.388	8.6296	24	1	1	0	0	0	1	0.380952	21	0	0	109.891	43	0	0	0	0	0	0	1	1
Bifemelane	ZINC000001542896	Benzene and substituted derivatives	Diphenylmethanes	1389	-5.69	-6.5369	-6.5	5.69	6.5369	6.5	1.13813	0.196462	0.094	0.306	0.313	0.169	0.18625	12	6	0	1	0	1	0	0	2	269.388	8.6296	24	1	1	0	0	0	1	0.380952	21	0	0	109.891	43	0	0	0	0	0	0	1	1
Caramiphen	ZINC000001847743	Benzene and substituted derivatives	?	1390	-5.34	-5.53552	-5.5	5.34	5.53552	5.5	2.94754	2.03698	0.195	0.844	0.852	0.917	0.72025	11	7	0	1	0	2	0	0	2	289.419	8.8018	29	2	1	1	0	0	1	0.363636	22	0	0	116.032	48	0	0	0	0	0	0	1	2
Caramiphen	ZINC000001847743	Benzene and substituted derivatives	?	1391	-4.21	-5.4801	-5.5	4.21	5.4801	5.5	3.12478	2.14287	0.777	0.865	0.852	0.96	0.88725	11	7	0	1	0	2	0	0	2	289.419	8.8018	29	2	1	1	0	0	1	0.363636	22	0	0	116.032	48	0	0	0	0	0	0	1	2
Caramiphen	ZINC000001847743	Benzene and substituted derivatives	?	1392	-4.18	-5.42262	-5.5	4.18	5.42262	5.5	3.46443	1.43092	0.789	0.885	0.852	0.988	0.90425	11	7	0	1	0	2	0	0	2	289.419	8.8018	29	2	1	1	0	0	1	0.363636	22	0	0	116.032	48	0	0	0	0	0	0	1	2
Tofenacin	ZINC000001704297	Benzene and substituted derivatives	Diphenylmethanes	1393	-4.37	-5.80564	-5.4	4.37	5.80564	5.4	1.59392	1.08898	0.702	0.723	0.888	0.38	0.5875	12	5	0	1	0	1	0	0	2	255.361	7.8662	22	1	1	0	0	0	1	0.3	20	0	0	102.529	40	0	0	0	0	0	0	1	1
Tofenacin	ZINC000001704297	Benzene and substituted derivatives	Diphenylmethanes	1394	-4.54	-5.42878	-5.4	4.54	5.42878	5.4	1.69515	1.1471	0.614	0.883	0.888	0.425	0.588	12	5	0	1	0	1	0	0	2	255.361	7.8662	22	1	1	0	0	0	1	0.3	20	0	0	102.529	40	0	0	0	0	0	0	1	1
Tofenacin	ZINC000001704297	Benzene and substituted derivatives	Diphenylmethanes	1395	-4.41	-5.68318	-5.4	4.41	5.68318	5.4	2.03881	0.471025	0.682	0.778	0.888	0.584	0.6845	12	5	0	1	0	1	0	0	2	255.361	7.8662	22	1	1	0	0	0	1	0.3	20	0	0	102.529	40	0	0	0	0	0	0	1	1
Alagebrium	ZINC000003916477	Organooxygen compounds	Carbonyl compounds	1396	-4.1	-6.21732	-6	4.1	6.21732	6	1.25283	0.873033	0.823	0.483	0.6	0.224	0.46775	9	4	1	0	0	1	0	1	2	232.328	4.7843	15	2	0	0	0	0	0	0.176471	17	1	0	82.3555	30	0	0	0	0	0	0	1	1
Alagebrium	ZINC000003916477	Organooxygen compounds	Carbonyl compounds	1397	-4.71	-6.21325	-6	4.71	6.21325	6	0.831598	0.574067	0.516	0.487	0.6	0.06	0.309	9	4	1	0	0	1	0	1	2	232.328	4.7843	15	2	0	0	0	0	0	0.176471	17	1	0	82.3555	30	0	0	0	0	0	0	1	1
Alagebrium	ZINC000003916477	Organooxygen compounds	Carbonyl compounds	1398	-4.62	-6.13424	-6	4.62	6.13424	6	0.550421	0.369585	0.564	0.534	0.6	0.016	0.299	9	4	1	0	0	1	0	1	2	232.328	4.7843	15	2	0	0	0	0	0	0.176471	17	1	0	82.3555	30	0	0	0	0	0	0	1	1
Benzalamide	ZINC000002029423	Benzene and substituted derivatives	?	1399	-3.55	-5.52704	-5.5	3.55	5.52704	5.5	1.46262	0.969062	0.96	0.847	0.852	0.324	0.615	6	5	0	1	0	1	0	0	1	175.231	4.5884	15	2	1	0	0	0	0	0.230769	13	0	0	67.4138	26	0	0	0	0	0	0	1	1
Benzalamide	ZINC000002029423	Benzene and substituted derivatives	?	1400	-4.01	-5.49975	-5.5	4.01	5.49975	5.5	1.56702	1.02516	0.856	0.859	0.852	0.369	0.6115	6	5	0	1	0	1	0	0	1	175.231	4.5884	15	2	1	0	0	0	0	0.230769	13	0	0	67.4138	26	0	0	0	0	0	0	1	1
Benzalamide	ZINC000002029423	Benzene and substituted derivatives	?	1401	-3.46	-5.20773	-5.5	3.46	5.20773	5.5	1.98914	0.469686	0.972	0.933	0.852	0.558	0.735	6	5	0	1	0	1	0	0	1	175.231	4.5884	15	2	1	0	0	0	0	0.230769	13	0	0	67.4138	26	0	0	0	0	0	0	1	1
Lonidamine	ZINC000000001632	Benzopyrazoles	Indazoles	1402	-6.16	-5.98712	-6.1	6.16	5.98712	6.1	2.71812	1.73607	0.028	0.616	0.538	0.843	0.563	13	2	2	0	0	2	0	0	3	320.155	5.761	11	4	0	1	1	0	0	0.130435	23	1	0	90.032	30	2	0	0	2	0	0	2	2
Lonidamine	ZINC000000001632	Benzopyrazoles	Indazoles	1403	-6.11	-7.2884	-7.3	6.11	7.2884	7.3	2.76289	1.93265	0.032	0.068	0.061	0.863	0.45475	13	2	2	0	0	2	0	0	3	320.155	5.761	11	4	0	1	1	0	0	0.130435	23	1	0	90.032	30	2	0	0	2	0	0	2	2
Cloridarol	ZINC000000000176	Benzofurans	?	1404	-5.22	-6.74244	-6.6	5.22	6.74244	6.6	2.15843	1.24459	0.243	0.222	0.268	0.64	0.44775	14	1	0	0	1	1	0	0	3	258.704	5.2257	12	2	1	1	0	1	0	0.1	20	1	0	83.8038	29	1	0	0	1	0	0	0	2
Cloridarol	ZINC000000000176	Benzofurans	?	1405	-4.92	-7.31668	-7.1	4.92	7.31668	7.1	2.01713	1.39741	0.403	0.063	0.101	0.572	0.412	14	1	0	0	1	1	0	0	3	258.704	5.2257	12	2	1	1	0	1	0	0.1	20	1	0	83.8038	29	1	0	0	1	0	0	0	2
Cloridarol	ZINC000000000176	Benzofurans	?	1406	-5.23	-6.77103	-6.6	5.23	6.77103	6.6	2.23824	1.32975	0.239	0.211	0.268	0.672	0.46275	14	1	0	0	1	1	0	0	3	258.704	5.2257	12	2	1	1	0	1	0	0.1	20	1	0	83.8038	29	1	0	0	1	0	0	0	2
Cirazoline	ZINC000000001160	Phenol ethers	?	1407	-4.48	-5.71542	-5.7	4.48	5.71542	5.7	2.53978	1.73225	0.643	0.766	0.763	0.781	0.742	12	1	2	0	0	1	0	0	3	216.284	5.2599	19	3	1	1	0	0	1	0.222222	18	1	0	75.9828	32	0	0	0	0	0	0	2	1
Cirazoline	ZINC000000001160	Phenol ethers	?	1408	-4.43	-6.15984	-6.1	4.43	6.15984	6.1	2.49366	1.68219	0.669	0.519	0.538	0.764	0.68375	12	1	2	0	0	1	0	0	3	216.284	5.2599	19	3	1	1	0	0	1	0.222222	18	1	0	75.9828	32	0	0	0	0	0	0	2	1
Cirazoline	ZINC000000001160	Phenol ethers	?	1409	-5.06	-5.88929	-5.9	5.06	5.88929	5.9	2.53203	1.73107	0.326	0.677	0.662	0.778	0.636	12	1	2	0	0	1	0	0	3	216.284	5.2599	19	3	1	1	0	0	1	0.222222	18	1	0	75.9828	32	0	0	0	0	0	0	2	1
Trifluridine	ZINC000000002219	Pyrimidine nucleosides	Pyrimidine 2-deoxyribonucleosides	1410	-5.08	-5.84297	-5.6	5.08	5.84297	5.6	1.2941	0.619619	0.315	0.704	0.81	0.244	0.40325	4	1	2	0	0	2	0	0	2	296.201	1.2832	16	6	3	3	0	2	0	0.142857	21	2	0	70.318	31	3	0	0	0	0	3	2	5
Trifluridine	ZINC000000002219	Pyrimidine nucleosides	Pyrimidine 2-deoxyribonucleosides	1411	-5.77	-5.715	-5.4	5.77	5.715	5.4	1.65321	0.522701	0.079	0.766	0.888	0.403	0.44325	4	1	2	0	0	2	0	0	2	296.201	1.2832	16	6	3	3	0	2	0	0.142857	21	2	0	70.318	31	3	0	0	0	0	3	2	5
Trifluridine	ZINC000000002219	Pyrimidine nucleosides	Pyrimidine 2-deoxyribonucleosides	1412	-5.74	-5.55734	-5.3	5.74	5.55734	5.3	1.42538	0.754054	0.085	0.835	0.912	0.307	0.40275	4	1	2	0	0	2	0	0	2	296.201	1.2832	16	6	3	3	0	2	0	0.142857	21	2	0	70.318	31	3	0	0	0	0	3	2	5
Tetriprofen	ZINC000006037100	Phenylpropanoic acids	?	1413	-3.65	-6.16768	-6.1	3.65	6.16768	6.1	0.982563	0.345768	0.944	0.514	0.538	0.1	0.4205	12	3	0	0	0	2	0	0	2	229.299	6.6701	18	2	0	1	1	0	0	0.166667	18	0	0	86.0255	34	0	0	0	0	0	0	0	2
Tetriprofen	ZINC000006037100	Phenylpropanoic acids	?	1414	-3.43	-6.12589	-6.2	3.43	6.12589	6.2	1.07976	0.26873	0.973	0.539	0.474	0.143	0.43325	12	3	0	0	0	2	0	0	2	229.299	6.6701	18	2	0	1	1	0	0	0.166667	18	0	0	86.0255	34	0	0	0	0	0	0	0	2
Tetriprofen	ZINC000006037100	Phenylpropanoic acids	?	1415	-3.54	-6.24173	-6	3.54	6.24173	6	0.915865	0.397731	0.961	0.466	0.6	0.082	0.43125	12	3	0	0	0	2	0	0	2	229.299	6.6701	18	2	0	1	1	0	0	0.166667	18	0	0	86.0255	34	0	0	0	0	0	0	0	2
Oxapadol	ZINC000001846290	Benzimidazoles	?	1416	-5.46	-7.3803	-7.4	5.46	7.3803	7.4	1.96351	1.35934	0.156	0.054	0.045	0.546	0.32325	17	0	2	0	2	0	0	0	5	278.311	5.493	17	4	0	0	0	0	0	0.04	25	3	0	92.685	35	0	0	0	0	0	0	2	2
Oxapadol	ZINC000001846290	Benzimidazoles	?	1417	-5.24	-7.39304	-7.4	5.24	7.39304	7.4	1.18353	0.82418	0.233	0.052	0.045	0.19	0.1645	17	0	2	0	2	0	0	0	5	278.311	5.493	17	4	0	0	0	0	0	0.04	25	3	0	92.685	35	0	0	0	0	0	0	2	2
Fenozolone	ZINC000000000302	Benzene and substituted derivatives	?	1418	-4.41	-5.82157	-5.6	4.41	5.82157	5.6	1.06679	0.440264	0.682	0.716	0.81	0.136	0.441	9	2	1	1	1	1	0	0	2	204.229	3.2282	16	4	1	1	0	0	1	0.1875	16	1	0	66.0746	27	0	0	0	0	0	0	2	2
Fenozolone	ZINC000000000302	Benzene and substituted derivatives	?	1419	-4.75	-5.62803	-5.6	4.75	5.62803	5.6	1.43694	0.170938	0.495	0.808	0.81	0.313	0.48275	9	2	1	1	1	1	0	0	2	204.229	3.2282	16	4	1	1	0	0	1	0.1875	16	1	0	66.0746	27	0	0	0	0	0	0	2	2
Fenozolone	ZINC000000000302	Benzene and substituted derivatives	?	1420	-4.67	-5.83041	-5.8	4.67	5.83041	5.8	1.36147	0.22503	0.538	0.71	0.715	0.276	0.45125	9	2	1	1	1	1	0	0	2	204.229	3.2282	16	4	1	1	0	0	1	0.1875	16	1	0	66.0746	27	0	0	0	0	0	0	2	2
Amezinium	ZINC000000000908	Diazines	Pyridazines and derivatives	1421	-4.58	-6.05906	-6	4.58	6.05906	6	2.18092	1.1387	0.587	0.578	0.6	0.649	0.62125	10	1	2	1	0	1	0	0	2	202.237	3.607	15	3	1	0	0	0	0	0.125	16	1	0	71.2948	27	0	0	0	0	0	0	3	1
Amezinium	ZINC000000000908	Diazines	Pyridazines and derivatives	1422	-4.3	-5.95355	-5.9	4.3	5.95355	5.9	1.90708	0.995922	0.738	0.635	0.662	0.524	0.612	10	1	2	1	0	1	0	0	2	202.237	3.607	15	3	1	0	0	0	0	0.125	16	1	0	71.2948	27	0	0	0	0	0	0	3	1
Amezinium	ZINC000000000908	Diazines	Pyridazines and derivatives	1423	-4.17	-5.96163	-5.9	4.17	5.96163	5.9	1.73872	1.20457	0.794	0.63	0.662	0.446	0.587	10	1	2	1	0	1	0	0	2	202.237	3.607	15	3	1	0	0	0	0	0.125	16	1	0	71.2948	27	0	0	0	0	0	0	3	1
Procinolol	ZINC000001567464	Phenol ethers	?	1424	-5.13	-6.29438	-6.2	5.13	6.29438	6.2	1.55133	1.00586	0.29	0.439	0.474	0.362	0.372	9	6	0	1	0	2	0	0	2	249.354	7.2768	25	2	2	1	0	1	1	0.368421	19	0	0	99.2109	41	0	0	0	0	0	0	1	2
Procinolol	ZINC000001567464	Phenol ethers	?	1425	-4.67	-5.88591	-5.7	4.67	5.88591	5.7	2.22348	1.35106	0.538	0.679	0.763	0.665	0.65775	9	6	0	1	0	2	0	0	2	249.354	7.2768	25	2	2	1	0	1	1	0.368421	19	0	0	99.2109	41	0	0	0	0	0	0	1	2
Procinolol	ZINC000001567464	Phenol ethers	?	1426	-4.73	-6.29802	-6.2	4.73	6.29802	6.2	2.46322	0.656261	0.505	0.437	0.474	0.755	0.62225	9	6	0	1	0	2	0	0	2	249.354	7.2768	25	2	2	1	0	1	1	0.368421	19	0	0	99.2109	41	0	0	0	0	0	0	1	2
Carbamazepine	ZINC000000004785	Benzazepines	Dibenzazepines	1427	-3.88	-5.67593	-5.7	3.88	5.67593	5.7	1.71935	1.21348	0.893	0.782	0.763	0.437	0.6325	14	1	1	1	0	1	0	0	3	236.274	5.8109	15	2	1	0	0	0	0	0.05	20	1	0	82.407	30	0	0	0	0	0	0	2	1
Carbamazepine	ZINC000000004785	Benzazepines	Dibenzazepines	1428	-3.88	-6.82547	-6.8	3.88	6.82547	6.8	2.56436	1.79868	0.893	0.189	0.194	0.789	0.66625	14	1	1	1	0	1	0	0	3	236.274	5.8109	15	2	1	0	0	0	0	0.05	20	1	0	82.407	30	0	0	0	0	0	0	2	1
Carbamazepine	ZINC000000004785	Benzazepines	Dibenzazepines	1429	-3.82	-5.724	-5.7	3.82	5.724	5.7	1.12002	0.781472	0.91	0.762	0.763	0.159	0.49775	14	1	1	1	0	1	0	0	3	236.274	5.8109	15	2	1	0	0	0	0	0.05	20	1	0	82.407	30	0	0	0	0	0	0	2	1
Nolomirole	ZINC000004634613	Tetralins	?	1430	-5.12	-5.64471	-5.7	5.12	5.64471	5.7	3.00338	1.50662	0.295	0.799	0.763	0.933	0.731	10	9	0	1	0	4	0	0	2	333.428	8.8433	31	4	1	0	0	0	1	0.28	25	0	0	123.411	51	0	0	0	0	0	0	1	4
Perhexiline	ZINC000001999542	Piperidines	?	1431	-4.95	-6.56664	-6.6	4.95	6.56664	6.6	2.18327	1.53442	0.384	0.292	0.268	0.65	0.488	17	2	1	0	0	0	0	0	3	277.496	12.4928	35	0	1	0	0	0	1	0.181818	22	1	0	125.55	55	0	0	0	0	0	0	1	0
Perhexiline	ZINC000001999542	Piperidines	?	1432	-4.66	-6.56214	-6.6	4.66	6.56214	6.6	2.06173	1.44864	0.543	0.295	0.268	0.596	0.50075	17	2	1	0	0	0	0	0	3	277.496	12.4928	35	0	1	0	0	0	1	0.181818	22	1	0	125.55	55	0	0	0	0	0	0	1	0
Perhexiline	ZINC000001999542	Piperidines	?	1433	-4.01	-6.26851	-6.3	4.01	6.26851	6.3	2.04888	1.4243	0.856	0.452	0.421	0.588	0.61325	17	2	1	0	0	0	0	0	3	277.496	12.4928	35	0	1	0	0	0	1	0.181818	22	1	0	125.55	55	0	0	0	0	0	0	1	0
Nifenalol	ZINC000000000539	Benzene and substituted derivatives	Nitrobenzenes	1434	-5.44	-5.97219	-5.8	5.44	5.97219	5.8	2.18691	0.986675	0.162	0.624	0.715	0.652	0.54525	6	5	0	2	0	3	0	0	1	224.26	4.7607	18	1	2	1	0	1	1	0.3125	16	0	0	79.6673	32	0	0	0	0	0	0	2	3
Nifenalol	ZINC000000000539	Benzene and substituted derivatives	Nitrobenzenes	1435	-5.58	-5.97348	-5.8	5.58	5.97348	5.8	2.07201	0.670955	0.117	0.624	0.715	0.601	0.5085	6	5	0	2	0	3	0	0	1	224.26	4.7607	18	1	2	1	0	1	1	0.3125	16	0	0	79.6673	32	0	0	0	0	0	0	2	3
Nifenalol	ZINC000000000539	Benzene and substituted derivatives	Nitrobenzenes	1436	-5.01	-5.98484	-5.8	5.01	5.98484	5.8	1.88014	1.04456	0.352	0.618	0.715	0.509	0.52125	6	5	0	2	0	3	0	0	1	224.26	4.7607	18	1	2	1	0	1	1	0.3125	16	0	0	79.6673	32	0	0	0	0	0	0	2	3
Metesculetol	ZINC000000001696	Coumarins and derivatives	Hydroxycoumarins	1437	-4.35	-6.41838	-6.3	4.35	6.41838	6.3	1.53841	0.546374	0.713	0.371	0.421	0.357	0.462	9	3	0	0	1	5	0	0	2	249.198	2.7031	13	6	1	2	1	0	0	0.157895	19	1	0	70.4525	27	0	0	0	0	0	0	0	6
Metesculetol	ZINC000000001696	Coumarins and derivatives	Hydroxycoumarins	1438	-4.46	-6.4208	-6.3	4.46	6.4208	6.3	2.33602	1.34775	0.652	0.369	0.421	0.707	0.62175	9	3	0	0	1	5	0	0	2	249.198	2.7031	13	6	1	2	1	0	0	0.157895	19	1	0	70.4525	27	0	0	0	0	0	0	0	6
Metesculetol	ZINC000000001696	Coumarins and derivatives	Hydroxycoumarins	1439	-4.38	-6.61059	-6.4	4.38	6.61059	6.4	1.44684	0.487028	0.698	0.272	0.362	0.317	0.4235	9	3	0	0	1	5	0	0	2	249.198	2.7031	13	6	1	2	1	0	0	0.157895	19	1	0	70.4525	27	0	0	0	0	0	0	0	6
Quatacaine	ZINC000002019972	Carboxylic acids and derivatives	Amino acids, peptides, and analogues	1440	-4.75	-5.88597	-5.9	4.75	5.88597	5.9	2.15916	1.47866	0.495	0.679	0.662	0.641	0.60975	6	8	0	2	0	1	0	0	1	234.343	6.8954	24	2	2	1	0	0	1	0.352941	17	0	0	96.9185	39	0	0	0	0	0	0	2	1
Quatacaine	ZINC000002019972	Carboxylic acids and derivatives	Amino acids, peptides, and analogues	1441	-4.35	-6.09971	-6.1	4.35	6.09971	6.1	2.12729	1.43346	0.713	0.555	0.538	0.627	0.62625	6	8	0	2	0	1	0	0	1	234.343	6.8954	24	2	2	1	0	0	1	0.352941	17	0	0	96.9185	39	0	0	0	0	0	0	2	1
Quatacaine	ZINC000002019972	Carboxylic acids and derivatives	Amino acids, peptides, and analogues	1442	-4.26	-5.8008	-5.7	4.26	5.8008	5.7	2.10357	1.16073	0.756	0.726	0.763	0.616	0.68775	6	8	0	2	0	1	0	0	1	234.343	6.8954	24	2	2	1	0	0	1	0.352941	17	0	0	96.9185	39	0	0	0	0	0	0	2	1
Idropranolol	ZINC000000000383	Naphthalenes	?	1443	-4.48	-6.46345	-6.3	4.48	6.46345	6.3	1.9064	1.30593	0.643	0.347	0.421	0.524	0.528	10	6	0	1	0	2	0	0	2	261.365	7.459	25	2	2	1	0	1	1	0.3	20	0	0	104.495	42	0	0	0	0	0	0	1	2
Idropranolol	ZINC000000000383	Naphthalenes	?	1444	-4.97	-6.24726	-6.3	4.97	6.24726	6.3	1.9055	0.505896	0.372	0.464	0.421	0.524	0.46025	10	6	0	1	0	2	0	0	2	261.365	7.459	25	2	2	1	0	1	1	0.3	20	0	0	104.495	42	0	0	0	0	0	0	1	2
Idropranolol	ZINC000000000383	Naphthalenes	?	1445	-4.85	-6.36507	-6.3	4.85	6.36507	6.3	1.81939	0.746731	0.44	0.4	0.421	0.478	0.45425	10	6	0	1	0	2	0	0	2	261.365	7.459	25	2	2	1	0	1	1	0.3	20	0	0	104.495	42	0	0	0	0	0	0	1	2
Tolfenamic-acid	ZINC000000002188	Benzene and substituted derivatives	Benzoic acids and derivatives	1446	-4.67	-6.17612	-6.2	4.67	6.17612	6.2	1.24479	0.862659	0.538	0.509	0.474	0.221	0.3635	12	2	0	1	0	2	0	0	2	260.7	6.0357	13	2	1	2	1	0	0	0.157895	19	0	0	82.5114	29	1	0	0	1	0	0	1	2
Tolfenamic-acid	ZINC000000002188	Benzene and substituted derivatives	Benzoic acids and derivatives	1447	-4.36	-6.06655	-6.1	4.36	6.06655	6.1	1.44166	1.00375	0.707	0.571	0.538	0.315	0.46875	12	2	0	1	0	2	0	0	2	260.7	6.0357	13	2	1	2	1	0	0	0.157895	19	0	0	82.5114	29	1	0	0	1	0	0	1	2
Tolfenamic-acid	ZINC000000002188	Benzene and substituted derivatives	Benzoic acids and derivatives	1448	-4.46	-6.22542	-6.2	4.46	6.22542	6.2	1.33467	0.90514	0.652	0.477	0.474	0.261	0.412	12	2	0	1	0	2	0	0	2	260.7	6.0357	13	2	1	2	1	0	0	0.157895	19	0	0	82.5114	29	1	0	0	1	0	0	1	2
Propiram	ZINC000001850621	Pyridines and derivatives	?	1449	-4.72	-5.6457	-5.6	4.72	5.6457	5.6	0.906714	0.605398	0.511	0.799	0.81	0.079	0.36975	10	6	2	1	0	1	0	0	2	275.396	7.8109	28	3	1	1	0	0	1	0.285714	21	2	0	107.857	45	0	0	0	0	0	0	3	1
Propiram	ZINC000001850621	Pyridines and derivatives	?	1450	-4.11	-5.10387	-5.2	4.11	5.10387	5.2	1.92331	1.34869	0.821	0.951	0.933	0.531	0.704	10	6	2	1	0	1	0	0	2	275.396	7.8109	28	3	1	1	0	0	1	0.285714	21	2	0	107.857	45	0	0	0	0	0	0	3	1
Propiram	ZINC000001850621	Pyridines and derivatives	?	1451	-4.36	-5.14966	-5.2	4.36	5.14966	5.2	1.78011	1.23156	0.707	0.944	0.933	0.46	0.64	10	6	2	1	0	1	0	0	2	275.396	7.8109	28	3	1	1	0	0	1	0.285714	21	2	0	107.857	45	0	0	0	0	0	0	3	1
Orphenadrine	ZINC000000155269	Benzene and substituted derivatives	Diphenylmethanes	1452	-4.83	-5.95673	-6	4.83	5.95673	6	1.6777	1.1581	0.451	0.633	0.6	0.417	0.47125	12	6	0	1	0	1	0	0	2	269.388	8.3906	24	1	1	1	0	0	1	0.285714	21	0	0	109.639	43	0	0	0	0	0	0	1	1
Orphenadrine	ZINC000000155269	Benzene and substituted derivatives	Diphenylmethanes	1453	-4.42	-5.91831	-6	4.42	5.91831	6	1.5078	1.0204	0.677	0.661	0.6	0.344	0.49125	12	6	0	1	0	1	0	0	2	269.388	8.3906	24	1	1	1	0	0	1	0.285714	21	0	0	109.639	43	0	0	0	0	0	0	1	1
Orphenadrine	ZINC000000155269	Benzene and substituted derivatives	Diphenylmethanes	1454	-4.21	-5.94789	-6	4.21	5.94789	6	1.3832	0.910551	0.777	0.639	0.6	0.288	0.48825	12	6	0	1	0	1	0	0	2	269.388	8.3906	24	1	1	1	0	0	1	0.285714	21	0	0	109.639	43	0	0	0	0	0	0	1	1
Benzestrol	ZINC000003875596	?	?	1455	-4.19	-6.35688	-5.2	4.19	6.35688	5.2	2.34885	1.35298	0.784	0.404	0.933	0.712	0.78525	12	8	0	0	0	2	0	0	2	298.426	8.3368	28	2	2	2	0	0	0	0.26087	23	0	0	121.748	48	0	0	0	0	0	0	0	2
Benzestrol	ZINC000003875596	?	?	1456	-4.41	-6.34568	-6.1	4.41	6.34568	6.1	2.33906	1.36556	0.682	0.411	0.538	0.709	0.6595	12	8	0	0	0	2	0	0	2	298.426	8.3368	28	2	2	2	0	0	0	0.26087	23	0	0	121.748	48	0	0	0	0	0	0	0	2
Benzestrol	ZINC000003875596	?	?	1457	-4.04	-5.84765	-5.1	4.04	5.84765	5.1	2.38586	1.29224	0.844	0.701	0.952	0.727	0.8125	12	8	0	0	0	2	0	0	2	298.426	8.3368	28	2	2	2	0	0	0	0.26087	23	0	0	121.748	48	0	0	0	0	0	0	0	2
Drofenine	ZINC000001675361	Benzene and substituted derivatives	?	1458	-5.43	-6.08856	-6.1	5.43	6.08856	6.1	2.47986	1.7278	0.165	0.561	0.538	0.761	0.55625	12	8	0	1	0	2	0	0	2	317.473	10.5269	33	2	1	1	0	0	1	0.375	24	0	0	129.991	54	0	0	0	0	0	0	1	2
Drofenine	ZINC000001675361	Benzene and substituted derivatives	?	1459	-4.93	-6.0981	-6.1	4.93	6.0981	6.1	2.71951	1.23164	0.395	0.555	0.538	0.844	0.65525	12	8	0	1	0	2	0	0	2	317.473	10.5269	33	2	1	1	0	0	1	0.375	24	0	0	129.991	54	0	0	0	0	0	0	1	2
Drofenine	ZINC000001675361	Benzene and substituted derivatives	?	1460	-4.91	-6.11328	-6.1	4.91	6.11328	6.1	2.20076	1.5206	0.409	0.545	0.538	0.658	0.56575	12	8	0	1	0	2	0	0	2	317.473	10.5269	33	2	1	1	0	0	1	0.375	24	0	0	129.991	54	0	0	0	0	0	0	1	2
Metanixin	ZINC000000001694	Pyridines and derivatives	Pyridinecarboxylic acids and derivatives	1461	-4.73	-5.82307	-5.8	4.73	5.82307	5.8	1.20712	0.721922	0.505	0.714	0.715	0.202	0.406	11	3	1	1	0	2	0	0	2	241.27	5.462	16	3	1	2	1	0	0	0.157895	19	1	0	82.3764	31	0	0	0	0	0	0	2	2
Metanixin	ZINC000000001694	Pyridines and derivatives	Pyridinecarboxylic acids and derivatives	1462	-4.39	-5.80073	-5.8	4.39	5.80073	5.8	1.76331	0.756399	0.692	0.726	0.715	0.454	0.57875	11	3	1	1	0	2	0	0	2	241.27	5.462	16	3	1	2	1	0	0	0.157895	19	1	0	82.3764	31	0	0	0	0	0	0	2	2
Metanixin	ZINC000000001694	Pyridines and derivatives	Pyridinecarboxylic acids and derivatives	1463	-4.32	-5.86884	-5.9	4.32	5.86884	5.9	1.45981	0.544982	0.729	0.69	0.662	0.323	0.50925	11	3	1	1	0	2	0	0	2	241.27	5.462	16	3	1	2	1	0	0	0.157895	19	1	0	82.3764	31	0	0	0	0	0	0	2	2
Chloroxine	ZINC000000001131	Quinolines and derivatives	Haloquinolines	1464	-4.07	-5.32515	-5.3	4.07	5.32515	5.3	2.25762	1.55061	0.832	0.913	0.912	0.68	0.776	9	0	1	0	0	1	0	0	2	214.051	3.3413	7	2	1	1	0	0	0	0	14	1	0	59.409	18	2	0	0	2	0	0	1	1
Chloroxine	ZINC000000001131	Quinolines and derivatives	Haloquinolines	1465	-4.1	-5.19424	-5.2	4.1	5.19424	5.2	1.98587	1.3718	0.823	0.937	0.933	0.556	0.717	9	0	1	0	0	1	0	0	2	214.051	3.3413	7	2	1	1	0	0	0	0	14	1	0	59.409	18	2	0	0	2	0	0	1	1
Chloroxine	ZINC000000001131	Quinolines and derivatives	Haloquinolines	1466	-4.17	-5.32233	-5.3	4.17	5.32233	5.3	3.06968	2.01711	0.794	0.914	0.912	0.949	0.901	9	0	1	0	0	1	0	0	2	214.051	3.3413	7	2	1	1	0	0	0	0	14	1	0	59.409	18	2	0	0	2	0	0	1	1
Tulobuterol	ZINC000000020236	Benzene and substituted derivatives	Halobenzenes	1467	-4.83	-5.60503	-5.5	4.83	5.60503	5.5	1.983	1.29194	0.451	0.819	0.852	0.554	0.60275	6	6	0	1	0	1	0	0	1	227.735	5.7928	19	1	2	1	0	1	1	0.266667	15	0	0	84.9819	33	1	0	0	1	0	0	1	1
Tulobuterol	ZINC000000020236	Benzene and substituted derivatives	Halobenzenes	1468	-4.12	-5.71969	-5.5	4.12	5.71969	5.5	2.30949	0.584344	0.816	0.764	0.852	0.696	0.765	6	6	0	1	0	1	0	0	1	227.735	5.7928	19	1	2	1	0	1	1	0.266667	15	0	0	84.9819	33	1	0	0	1	0	0	1	1
Tulobuterol	ZINC000000020236	Benzene and substituted derivatives	Halobenzenes	1469	-3.93	-6.15507	-6	3.93	6.15507	6	2.07514	0.689708	0.88	0.523	0.6	0.602	0.671	6	6	0	1	0	1	0	0	1	227.735	5.7928	19	1	2	1	0	1	1	0.266667	15	0	0	84.9819	33	1	0	0	1	0	0	1	1
Bunaprolast	ZINC000001542264	Naphthalenes	?	1470	-4.55	-6.45043	-6.4	4.55	6.45043	6.4	2.48962	1.67093	0.608	0.353	0.362	0.763	0.624	10	7	0	0	0	3	0	0	2	272.344	7.5438	23	3	0	0	0	0	0	0.285714	21	0	0	102.466	40	0	0	0	0	0	0	0	3
Bunaprolast	ZINC000001542264	Naphthalenes	?	1471	-3.93	-6.40338	-6.4	3.93	6.40338	6.4	2.50905	1.67114	0.88	0.378	0.362	0.771	0.696	10	7	0	0	0	3	0	0	2	272.344	7.5438	23	3	0	0	0	0	0	0.285714	21	0	0	102.466	40	0	0	0	0	0	0	0	3
Bunaprolast	ZINC000001542264	Naphthalenes	?	1472	-4.22	-6.44872	-6.5	4.22	6.44872	6.5	2.50683	1.70619	0.772	0.354	0.313	0.77	0.65625	10	7	0	0	0	3	0	0	2	272.344	7.5438	23	3	0	0	0	0	0	0.285714	21	0	0	102.466	40	0	0	0	0	0	0	0	3
Imipramine	ZINC000000020245	Benzazepines	Dibenzazepines	1473	-4.66	-5.81928	-5.8	4.66	5.81928	5.8	1.48025	0.992108	0.543	0.717	0.715	0.333	0.481	14	5	1	1	0	0	0	0	3	280.415	9.1687	25	0	1	1	0	0	1	0.173913	23	1	0	114.255	45	0	0	0	0	0	0	2	0
Alverine	ZINC000001481966	Benzene and substituted derivatives	Phenylpropylamines	1474	-5.24	-7.15311	-7.1	5.24	7.15311	7.1	0.806781	0.482324	0.233	0.093	0.101	0.053	0.11	12	8	0	1	0	0	0	0	2	281.443	9.8947	27	0	1	1	0	0	1	0.409091	22	0	0	122.237	48	0	0	0	0	0	0	1	0
Alverine	ZINC000001481966	Benzene and substituted derivatives	Phenylpropylamines	1475	-4.71	-6.99569	-7	4.71	6.99569	7	1.33921	0.243195	0.516	0.133	0.129	0.264	0.29325	12	8	0	1	0	0	0	0	2	281.443	9.8947	27	0	1	1	0	0	1	0.409091	22	0	0	122.237	48	0	0	0	0	0	0	1	0
Alverine	ZINC000001481966	Benzene and substituted derivatives	Phenylpropylamines	1476	-4.85	-7.02699	-7	4.85	7.02699	7	1.39011	0.2652	0.44	0.121	0.129	0.291	0.28775	12	8	0	1	0	0	0	0	2	281.443	9.8947	27	0	1	1	0	0	1	0.409091	22	0	0	122.237	48	0	0	0	0	0	0	1	0
Proclonol	ZINC000000001985	Benzene and substituted derivatives	Diphenylmethanes	1477	-3.79	-6.15862	-6.1	3.79	6.15862	6.1	1.95219	1.27791	0.915	0.52	0.538	0.541	0.63375	15	1	0	0	0	1	0	0	3	293.193	6.3268	15	1	1	1	0	1	0	0.142857	21	0	0	94.4028	33	2	0	0	2	0	0	0	1
Proclonol	ZINC000000001985	Benzene and substituted derivatives	Diphenylmethanes	1478	-4.69	-6.22434	-6.1	4.69	6.22434	6.1	2.38111	1.62642	0.528	0.478	0.538	0.724	0.6285	15	1	0	0	0	1	0	0	3	293.193	6.3268	15	1	1	1	0	1	0	0.142857	21	0	0	94.4028	33	2	0	0	2	0	0	0	1
Proclonol	ZINC000000001985	Benzene and substituted derivatives	Diphenylmethanes	1479	-4.8	-6.44987	-6.2	4.8	6.44987	6.2	2.22898	1.35963	0.47	0.353	0.474	0.667	0.5695	15	1	0	0	0	1	0	0	3	293.193	6.3268	15	1	1	1	0	1	0	0.142857	21	0	0	94.4028	33	2	0	0	2	0	0	0	1
Pentosalen	ZINC000000001904	Coumarins and derivatives	Furanocoumarins	1480	-5.29	-6.37636	-6.4	5.29	6.37636	6.4	1.43008	0.967933	0.213	0.391	0.362	0.31	0.29875	11	5	0	0	2	2	0	0	3	270.284	6.1659	16	4	0	0	0	0	0	0.136364	22	2	0	92.3	34	0	0	0	0	0	0	0	4
Pentosalen	ZINC000000001904	Coumarins and derivatives	Furanocoumarins	1481	-5.43	-6.79749	-6.8	5.43	6.79749	6.8	1.01814	0.683746	0.165	0.2	0.194	0.115	0.14725	11	5	0	0	2	2	0	0	3	270.284	6.1659	16	4	0	0	0	0	0	0.136364	22	2	0	92.3	34	0	0	0	0	0	0	0	4
Pentosalen	ZINC000000001904	Coumarins and derivatives	Furanocoumarins	1482	-4.99	-6.5899	-6.6	4.99	6.5899	6.6	0.738886	0.494504	0.364	0.283	0.268	0.04	0.178	11	5	0	0	2	2	0	0	3	270.284	6.1659	16	4	0	0	0	0	0	0.136364	22	2	0	92.3	34	0	0	0	0	0	0	0	4
Mepiperphenidol	ZINC000001748000	Benzene and substituted derivatives	Phenylbutylamines	1483	-3.97	-6.23799	-6.2	3.97	6.23799	6.2	2.02242	1.19703	0.868	0.468	0.474	0.575	0.623	11	8	1	0	0	1	0	0	2	290.471	10.1394	33	1	1	1	0	1	1	0.272727	22	1	0	124.035	53	0	0	0	0	0	0	1	1
Mepiperphenidol	ZINC000001748000	Benzene and substituted derivatives	Phenylbutylamines	1484	-4.29	-5.65757	-5.5	4.29	5.65757	5.5	2.01714	1.14979	0.743	0.792	0.852	0.572	0.68475	11	8	1	0	0	1	0	0	2	290.471	10.1394	33	1	1	1	0	1	1	0.272727	22	1	0	124.035	53	0	0	0	0	0	0	1	1
Mepiperphenidol	ZINC000001748000	Benzene and substituted derivatives	Phenylbutylamines	1485	-5.01	-6.62144	-6.5	5.01	6.62144	6.5	2.03893	0.666295	0.352	0.268	0.313	0.584	0.45825	11	8	1	0	0	1	0	0	2	290.471	10.1394	33	1	1	1	0	1	1	0.272727	22	1	0	124.035	53	0	0	0	0	0	0	1	1
Oxaprozin	ZINC000049643479	Azoles	Oxazoles	1486	-4.42	-6.08601	-6.1	4.42	6.08601	6.1	1.63241	0.70111	0.677	0.562	0.538	0.396	0.50175	15	3	1	0	1	2	0	0	3	292.314	6.3829	16	4	0	1	1	0	0	0.208333	24	1	0	96.5825	36	0	0	0	0	0	0	1	3
Oxaprozin	ZINC000049643479	Azoles	Oxazoles	1487	-5.68	-6.9065	-6.9	5.68	6.9065	6.9	1.10743	0.222984	0.096	0.16	0.158	0.154	0.1405	15	3	1	0	1	2	0	0	3	292.314	6.3829	16	4	0	1	1	0	0	0.208333	24	1	0	96.5825	36	0	0	0	0	0	0	1	3
Oxaprozin	ZINC000049643479	Azoles	Oxazoles	1488	-5.14	-6.86414	-6.8	5.14	6.86414	6.8	0.618188	0.117462	0.285	0.175	0.194	0.023	0.13125	15	3	1	0	1	2	0	0	3	292.314	6.3829	16	4	0	1	1	0	0	0.208333	24	1	0	96.5825	36	0	0	0	0	0	0	1	3
Mexoprofen	ZINC000038418475	Phenylpropanoic acids	?	1489	-3.46	-6.79392	-6.8	3.46	6.79392	6.8	1.03275	0.232328	0.972	0.202	0.194	0.12	0.3515	12	4	0	0	0	2	0	0	2	245.342	7.8794	22	2	0	1	1	0	0	0.157895	19	0	0	94.7425	39	0	0	0	0	0	0	0	2
Mexoprofen	ZINC000038418475	Phenylpropanoic acids	?	1490	-3.07	-6.06867	-6.1	3.07	6.06867	6.1	1.48854	0.87521	0.996	0.571	0.538	0.336	0.5515	12	4	0	0	0	2	0	0	2	245.342	7.8794	22	2	0	1	1	0	0	0.157895	19	0	0	94.7425	39	0	0	0	0	0	0	0	2
Mexoprofen	ZINC000038418475	Phenylpropanoic acids	?	1491	-3.28	-5.70846	-5.7	3.28	5.70846	5.7	1.43606	0.87403	0.986	0.769	0.763	0.312	0.59325	12	4	0	0	0	2	0	0	2	245.342	7.8794	22	2	0	1	1	0	0	0.157895	19	0	0	94.7425	39	0	0	0	0	0	0	0	2
Tolpropamine	ZINC000001481933	Benzene and substituted derivatives	Diphenylmethanes	1492	-4.45	-6.19142	-6.2	4.45	6.19142	6.2	1.36098	0.206477	0.658	0.499	0.474	0.276	0.421	12	6	0	1	0	0	0	0	2	253.389	8.459	23	0	1	1	0	0	1	0.25	20	0	0	108.554	42	0	0	0	0	0	0	1	0
Tolpropamine	ZINC000001481933	Benzene and substituted derivatives	Diphenylmethanes	1493	-4.4	-6.47455	-6.5	4.4	6.47455	6.5	1.14254	0.76315	0.688	0.342	0.313	0.171	0.33575	12	6	0	1	0	0	0	0	2	253.389	8.459	23	0	1	1	0	0	1	0.25	20	0	0	108.554	42	0	0	0	0	0	0	1	0
Tolpropamine	ZINC000001481933	Benzene and substituted derivatives	Diphenylmethanes	1494	-4.73	-6.46282	-6.5	4.73	6.46282	6.5	1.10979	0.751923	0.505	0.347	0.313	0.155	0.282	12	6	0	1	0	0	0	0	2	253.389	8.459	23	0	1	1	0	0	1	0.25	20	0	0	108.554	42	0	0	0	0	0	0	1	0
Adrafinil	ZINC000004611316	Benzene and substituted derivatives	Diphenylmethanes	1495	-4.82	-6.73826	-6.6	4.82	6.73826	6.6	2.9157	1.29969	0.456	0.223	0.268	0.91	0.636	12	3	0	1	0	3	0	1	2	289.356	5.8279	18	4	2	2	1	0	0	0.285714	21	0	0	93.1841	35	0	0	0	0	0	0	1	3
Adrafinil	ZINC000004611316	Benzene and substituted derivatives	Diphenylmethanes	1496	-5.65	-7.18059	-6.9	5.65	7.18059	6.9	2.53219	1.00992	0.101	0.088	0.158	0.778	0.45375	12	3	0	1	0	3	0	1	2	289.356	5.8279	18	4	2	2	1	0	0	0.285714	21	0	0	93.1841	35	0	0	0	0	0	0	1	3
Adrafinil	ZINC000004611316	Benzene and substituted derivatives	Diphenylmethanes	1497	-5.29	-6.78439	-6.7	5.29	6.78439	6.7	3.15243	1.48218	0.213	0.206	0.229	0.963	0.592	12	3	0	1	0	3	0	1	2	289.356	5.8279	18	4	2	2	1	0	0	0.285714	21	0	0	93.1841	35	0	0	0	0	0	0	1	3
Tedatioxetine	ZINC000034003654	Piperidines	Phenylpiperidines	1498	-4.98	-5.59351	-5.6	4.98	5.59351	5.6	1.13201	0.737312	0.367	0.824	0.81	0.166	0.37725	17	1	1	0	0	0	0	1	3	283.44	8.82	22	1	1	0	0	0	1	0.136364	22	1	0	107.7	41	0	0	0	0	0	0	1	0
Tedatioxetine	ZINC000034003654	Piperidines	Phenylpiperidines	1499	-4.63	-5.72772	-5.7	4.63	5.72772	5.7	1.30967	0.895714	0.556	0.76	0.763	0.249	0.45425	17	1	1	0	0	0	0	1	3	283.44	8.82	22	1	1	0	0	0	1	0.136364	22	1	0	107.7	41	0	0	0	0	0	0	1	0
Tedatioxetine	ZINC000034003654	Piperidines	Phenylpiperidines	1500	-5.29	-5.52608	-5.6	5.29	5.52608	5.6	1.61324	0.354149	0.213	0.847	0.81	0.388	0.44975	17	1	1	0	0	0	0	1	3	283.44	8.82	22	1	1	0	0	0	1	0.136364	22	1	0	107.7	41	0	0	0	0	0	0	1	0
Atropine-oxide	ZINC000100379436	Tropane alkaloids	?	1501	-4.5	-4.83187	-5.1	4.5	4.83187	5.1	1.73142	1.15232	0.634	0.977	0.952	0.444	0.6185	13	4	1	0	0	4	0	0	3	305.374	6.8152	26	4	1	2	0	1	1	0.208333	24	2	0	106.389	45	0	0	0	0	0	0	1	4
Atropine-oxide	ZINC000100379436	Tropane alkaloids	?	1502	-4.51	-5.34636	-4.9	4.51	5.34636	4.9	2.05339	1.12218	0.628	0.908	0.97	0.59	0.6945	13	4	1	0	0	4	0	0	3	305.374	6.8152	26	4	1	2	0	1	1	0.208333	24	2	0	106.389	45	0	0	0	0	0	0	1	4
Atropine-oxide	ZINC000100379436	Tropane alkaloids	?	1503	-4.24	-5.97981	-5.9	4.24	5.97981	5.9	2.14535	1.34984	0.764	0.62	0.662	0.633	0.673	13	4	1	0	0	4	0	0	3	305.374	6.8152	26	4	1	2	0	1	1	0.208333	24	2	0	106.389	45	0	0	0	0	0	0	1	4
Betamipron	ZINC000000012614	Benzene and substituted derivatives	?	1504	-3.98	-5.37993	-5.4	3.98	5.37993	5.4	1.24584	0.809711	0.865	0.899	0.888	0.221	0.54875	6	4	0	1	0	3	0	0	1	192.194	3.3902	13	4	1	2	1	0	0	0.357143	14	0	0	59.3574	24	0	0	0	0	0	0	1	3
Betamipron	ZINC000000012614	Benzene and substituted derivatives	?	1505	-4.31	-5.88011	-5.9	4.31	5.88011	5.9	1.13877	0.261882	0.734	0.683	0.662	0.17	0.434	6	4	0	1	0	3	0	0	1	192.194	3.3902	13	4	1	2	1	0	0	0.357143	14	0	0	59.3574	24	0	0	0	0	0	0	1	3
Betamipron	ZINC000000012614	Benzene and substituted derivatives	?	1506	-4.33	-5.39959	-5.4	4.33	5.39959	5.4	1.35844	0.838633	0.724	0.892	0.888	0.275	0.5405	6	4	0	1	0	3	0	0	1	192.194	3.3902	13	4	1	2	1	0	0	0.357143	14	0	0	59.3574	24	0	0	0	0	0	0	1	3
Peldesine	ZINC000005420970	Pyrrolopyrimidines	?	1507	-6.04	-7.33497	-7.1	6.04	7.33497	7.1	3.15878	1.8752	0.042	0.059	0.101	0.965	0.51825	11	1	4	1	0	1	0	0	3	241.254	3.3846	15	4	3	2	0	0	0	0.1	20	3	0	79.6166	29	0	0	0	0	0	0	5	1
Peldesine	ZINC000005420970	Pyrrolopyrimidines	?	1508	-6.04	-7.33505	-7.1	6.04	7.33505	7.1	2.71486	1.85849	0.042	0.059	0.101	0.843	0.45725	11	1	4	1	0	1	0	0	3	241.254	3.3846	15	4	3	2	0	0	0	0.1	20	3	0	79.6166	29	0	0	0	0	0	0	5	1
Peldesine	ZINC000005420970	Pyrrolopyrimidines	?	1509	-5.92	-7.30275	-7.1	5.92	7.30275	7.1	2.735	1.84967	0.058	0.065	0.101	0.851	0.46525	11	1	4	1	0	1	0	0	3	241.254	3.3846	15	4	3	2	0	0	0	0.1	20	3	0	79.6166	29	0	0	0	0	0	0	5	1
Prilocaine	ZINC000001530816	Carboxylic acids and derivatives	Amino acids, peptides, and analogues	1510	-3.95	-5.97833	-6	3.95	5.97833	6	2.20561	1.51811	0.874	0.621	0.6	0.661	0.699	6	7	0	2	0	1	0	0	1	220.316	6.6085	22	2	2	1	0	0	1	0.375	16	0	0	89.9595	36	0	0	0	0	0	0	2	1
Prilocaine	ZINC000001530816	Carboxylic acids and derivatives	Amino acids, peptides, and analogues	1511	-4.57	-5.95365	-6	4.57	5.95365	6	2.057	1.34843	0.595	0.635	0.6	0.592	0.59475	6	7	0	2	0	1	0	0	1	220.316	6.6085	22	2	2	1	0	0	1	0.375	16	0	0	89.9595	36	0	0	0	0	0	0	2	1
Prilocaine	ZINC000001530816	Carboxylic acids and derivatives	Amino acids, peptides, and analogues	1512	-4.7	-5.97039	-6.1	4.7	5.97039	6.1	2.01046	1.34599	0.522	0.625	0.538	0.568	0.549	6	7	0	2	0	1	0	0	1	220.316	6.6085	22	2	2	1	0	0	1	0.375	16	0	0	89.9595	36	0	0	0	0	0	0	2	1
Xylamidine	ZINC000005782247	Phenol ethers	Anisoles	1513	-6.35	-7.22605	-7.2	6.35	7.22605	7.2	1.35292	0.892964	0.015	0.078	0.08	0.272	0.15975	12	7	0	2	0	2	0	0	2	312.413	8.9294	28	4	2	2	0	0	1	0.333333	24	0	0	119.679	47	0	0	0	0	0	0	2	2
Xylamidine	ZINC000005782247	Phenol ethers	Anisoles	1514	-6.27	-7.23468	-7.2	6.27	7.23468	7.2	1.2773	0.859167	0.021	0.076	0.08	0.236	0.14325	12	7	0	2	0	2	0	0	2	312.413	8.9294	28	4	2	2	0	0	1	0.333333	24	0	0	119.679	47	0	0	0	0	0	0	2	2
Xylamidine	ZINC000005782247	Phenol ethers	Anisoles	1515	-6.39	-7.22885	-7.2	6.39	7.22885	7.2	1.61585	1.10887	0.014	0.077	0.08	0.389	0.218	12	7	0	2	0	2	0	0	2	312.413	8.9294	28	4	2	2	0	0	1	0.333333	24	0	0	119.679	47	0	0	0	0	0	0	2	2
Tolimidone	ZINC000017120697	Organooxygen compounds	Ethers	1516	-4.46	-6.14722	-6.2	4.46	6.14722	6.2	1.75097	1.2245	0.652	0.526	0.474	0.45	0.5065	10	1	2	0	0	2	0	0	2	202.213	3.3221	13	3	1	1	0	0	0	0.125	16	1	0	66.8154	25	0	0	0	0	0	0	2	2
Tolimidone	ZINC000017120697	Organooxygen compounds	Ethers	1517	-4.61	-6.43875	-6.4	4.61	6.43875	6.4	1.21002	0.833791	0.569	0.361	0.362	0.203	0.33425	10	1	2	0	0	2	0	0	2	202.213	3.3221	13	3	1	1	0	0	0	0.125	16	1	0	66.8154	25	0	0	0	0	0	0	2	2
Tolimidone	ZINC000017120697	Organooxygen compounds	Ethers	1518	-4.44	-6.15671	-6.2	4.44	6.15671	6.2	0.871806	0.562249	0.664	0.521	0.474	0.072	0.3205	10	1	2	0	0	2	0	0	2	202.213	3.3221	13	3	1	1	0	0	0	0.125	16	1	0	66.8154	25	0	0	0	0	0	0	2	2
Araprofen	ZINC000005141751	Phenylpropanoic acids	?	1519	-4.57	-6.59863	-6.5	4.57	6.59863	6.5	1.09348	0.326744	0.595	0.278	0.313	0.15	0.302	12	4	0	1	0	4	0	0	2	283.283	5.8419	16	4	1	3	2	0	0	0.227273	22	0	0	89.0589	34	0	0	0	0	0	0	1	4
Araprofen	ZINC000005141751	Phenylpropanoic acids	?	1520	-5.36	-6.97964	-7	5.36	6.97964	7	3.08437	1.73088	0.188	0.139	0.129	0.952	0.55525	12	4	0	1	0	4	0	0	2	283.283	5.8419	16	4	1	3	2	0	0	0.227273	22	0	0	89.0589	34	0	0	0	0	0	0	1	4
Araprofen	ZINC000005141751	Phenylpropanoic acids	?	1521	-5.15	-6.61364	-6.6	5.15	6.61364	6.6	1.00199	0.264137	0.281	0.271	0.268	0.108	0.19125	12	4	0	1	0	4	0	0	2	283.283	5.8419	16	4	1	3	2	0	0	0.227273	22	0	0	89.0589	34	0	0	0	0	0	0	1	4
Tarafenacin	ZINC000000593626	Benzene and substituted derivatives	Phenylcarbamic acid esters	1522	-5.92	-5.84597	-5.5	5.92	5.84597	5.5	3.26319	0.708149	0.058	0.702	0.852	0.977	0.716	19	2	1	1	0	2	0	0	4	408.395	9.1757	23	3	1	1	0	0	1	0.1875	32	2	0	118.842	49	4	0	0	0	0	4	2	2
Thurfyl-nicotinate	ZINC000000000765	Pyridines and derivatives	Pyridinecarboxylic acids and derivatives	1523	-4.17	-5.58979	-5.6	4.17	5.58979	5.6	1.31438	0.898823	0.794	0.826	0.81	0.252	0.527	9	2	1	0	1	2	0	0	2	207.229	4.4143	17	4	0	0	0	0	0	0.25	16	2	0	67.4565	28	0	0	0	0	0	0	1	3
Thurfyl-nicotinate	ZINC000000000765	Pyridines and derivatives	Pyridinecarboxylic acids and derivatives	1524	-4.13	-5.66172	-5.6	4.13	5.66172	5.6	1.19114	0.823996	0.812	0.789	0.81	0.193	0.502	9	2	1	0	1	2	0	0	2	207.229	4.4143	17	4	0	0	0	0	0	0.25	16	2	0	67.4565	28	0	0	0	0	0	0	1	3
Thurfyl-nicotinate	ZINC000000000765	Pyridines and derivatives	Pyridinecarboxylic acids and derivatives	1525	-4.14	-5.55978	-5.5	4.14	5.55978	5.5	1.74709	0.387313	0.806	0.835	0.852	0.449	0.639	9	2	1	0	1	2	0	0	2	207.229	4.4143	17	4	0	0	0	0	0	0.25	16	2	0	67.4565	28	0	0	0	0	0	0	1	3
Mirogabalin	ZINC000117200300	Carboxylic acids and derivatives	Amino acids, peptides, and analogues	1526	-4.41	-5.97616	-5.8	4.41	5.97616	5.8	2.54756	1.50442	0.682	0.623	0.715	0.783	0.74075	7	5	0	1	0	2	0	0	2	208.281	6.3785	19	2	1	1	1	0	0	0.25	16	0	0	77.468	33	0	0	0	0	0	0	1	2
Mirogabalin	ZINC000117200300	Carboxylic acids and derivatives	Amino acids, peptides, and analogues	1527	-3.82	-6.00518	-5.9	3.82	6.00518	5.9	2.72632	1.78042	0.91	0.605	0.662	0.847	0.8165	7	5	0	1	0	2	0	0	2	208.281	6.3785	19	2	1	1	1	0	0	0.25	16	0	0	77.468	33	0	0	0	0	0	0	1	2
Mirogabalin	ZINC000117200300	Carboxylic acids and derivatives	Amino acids, peptides, and analogues	1528	-4.25	-6.00766	-5.8	4.25	6.00766	5.8	2.40441	1.38075	0.761	0.604	0.715	0.733	0.7355	7	5	0	1	0	2	0	0	2	208.281	6.3785	19	2	1	1	1	0	0	0.25	16	0	0	77.468	33	0	0	0	0	0	0	1	2
Ciprofibrate	ZINC000002005072	Benzene and substituted derivatives	Phenoxyacetic acid derivatives	1529	-4.18	-6.22121	-6.2	4.18	6.22121	6.2	2.15505	1.4812	0.789	0.48	0.474	0.638	0.63475	9	4	0	0	0	3	0	0	2	288.15	5.7944	15	3	0	1	1	0	0	0.210526	19	0	0	83.0595	31	2	0	0	2	0	0	0	3
Ciprofibrate	ZINC000002005072	Benzene and substituted derivatives	Phenoxyacetic acid derivatives	1530	-4.17	-6.41867	-6.4	4.17	6.41867	6.4	2.14995	1.4891	0.794	0.371	0.362	0.635	0.6065	9	4	0	0	0	3	0	0	2	288.15	5.7944	15	3	0	1	1	0	0	0.210526	19	0	0	83.0595	31	2	0	0	2	0	0	0	3
Ciprofibrate	ZINC000002005072	Benzene and substituted derivatives	Phenoxyacetic acid derivatives	1531	-4.18	-6.16819	-6.1	4.18	6.16819	6.1	2.39089	1.1308	0.789	0.513	0.538	0.729	0.69625	9	4	0	0	0	3	0	0	2	288.15	5.7944	15	3	0	1	1	0	0	0.210526	19	0	0	83.0595	31	2	0	0	2	0	0	0	3
Oxindanac	ZINC000001846144	Benzene and substituted derivatives	Benzophenones	1532	-4.81	-6.68711	-6.6	4.81	6.68711	6.6	3.43248	2.24968	0.461	0.242	0.268	0.987	0.67575	15	2	0	0	0	4	0	0	3	281.287	4.5463	16	4	1	2	1	0	0	0.130435	23	0	0	89.68	34	0	0	0	0	0	0	0	4
Oxindanac	ZINC000001846144	Benzene and substituted derivatives	Benzophenones	1533	-5.59	-8.054	-7.9	5.59	8.054	7.9	3.17692	1.74664	0.114	0.004	0.008	0.967	0.514	15	2	0	0	0	4	0	0	3	281.287	4.5463	16	4	1	2	1	0	0	0.130435	23	0	0	89.68	34	0	0	0	0	0	0	0	4
Piroximone	ZINC000000001965	Pyridines and derivatives	Pyridinecarboxylic acids and derivatives	1534	-5.15	-5.66849	-5.7	5.15	5.66849	5.7	2.19868	1.48304	0.281	0.784	0.763	0.657	0.5895	8	3	3	0	0	2	0	0	2	217.228	2.7639	14	3	2	2	0	0	0	0.176471	17	2	0	70.2943	27	0	0	0	0	0	0	3	2
Piroximone	ZINC000000001965	Pyridines and derivatives	Pyridinecarboxylic acids and derivatives	1535	-5.34	-5.66374	-5.7	5.34	5.66374	5.7	1.60859	0.37887	0.195	0.787	0.763	0.386	0.4325	8	3	3	0	0	2	0	0	2	217.228	2.7639	14	3	2	2	0	0	0	0.176471	17	2	0	70.2943	27	0	0	0	0	0	0	3	2
Piroximone	ZINC000000001965	Pyridines and derivatives	Pyridinecarboxylic acids and derivatives	1536	-4.87	-6.54559	-6.5	4.87	6.54559	6.5	2.34032	1.63489	0.429	0.303	0.313	0.71	0.5405	8	3	3	0	0	2	0	0	2	217.228	2.7639	14	3	2	2	0	0	0	0.176471	17	2	0	70.2943	27	0	0	0	0	0	0	3	2
Brivaracetam	ZINC000003979899	Carboxylic acids and derivatives	Amino acids, peptides, and analogues	1537	-4.04	-4.9123	-5	4.04	4.9123	5	1.67001	1.1369	0.844	0.971	0.963	0.413	0.65825	4	7	1	1	0	2	0	0	1	212.293	5.6567	24	4	1	0	0	0	0	0.333333	15	1	0	77.612	35	0	0	0	0	0	0	2	2
Brivaracetam	ZINC000003979899	Carboxylic acids and derivatives	Amino acids, peptides, and analogues	1538	-4.31	-5.03292	-5	4.31	5.03292	5	2.53171	1.61995	0.734	0.962	0.963	0.777	0.81275	4	7	1	1	0	2	0	0	1	212.293	5.6567	24	4	1	0	0	0	0	0.333333	15	1	0	77.612	35	0	0	0	0	0	0	2	2
Brivaracetam	ZINC000003979899	Carboxylic acids and derivatives	Amino acids, peptides, and analogues	1539	-4.04	-5.14576	-5.2	4.04	5.14576	5.2	1.55451	0.799255	0.844	0.944	0.933	0.364	0.62625	4	7	1	1	0	2	0	0	1	212.293	5.6567	24	4	1	0	0	0	0	0.333333	15	1	0	77.612	35	0	0	0	0	0	0	2	2
Meso-hexestrol	ZINC000000056549	Stilbenes	?	1540	-4.66	-5.63687	-5.4	4.66	5.63687	5.4	2.6633	1.52502	0.543	0.804	0.888	0.827	0.77125	12	6	0	0	0	2	0	0	2	270.372	6.9232	24	2	2	2	0	0	0	0.238095	21	0	0	107.906	42	0	0	0	0	0	0	0	2
Meso-hexestrol	ZINC000000056549	Stilbenes	?	1541	-4.42	-6.76431	-6.3	4.42	6.76431	6.3	2.74253	1.72013	0.677	0.213	0.421	0.854	0.7015	12	6	0	0	0	2	0	0	2	270.372	6.9232	24	2	2	2	0	0	0	0.238095	21	0	0	107.906	42	0	0	0	0	0	0	0	2
Meso-hexestrol	ZINC000000056549	Stilbenes	?	1542	-4.19	-6.34267	-6.2	4.19	6.34267	6.2	2.7194	1.66609	0.784	0.412	0.474	0.844	0.7365	15	3	0	0	0	2	0	0	3	270.372	6.9232	24	2	2	2	0	0	0	0.238095	21	0	0	107.906	42	0	0	0	0	0	0	0	2
Clorindione	ZINC000100003913	Indanes	Indanones	1543	-4.64	-7.31454	-7.4	4.64	7.31454	7.4	1.12161	0.711136	0.551	0.063	0.045	0.16	0.229	15	0	0	0	0	2	0	0	3	256.688	4.7053	11	2	0	0	0	0	0	0.05	20	0	0	78.92	27	1	0	0	1	0	0	0	2
Clorindione	ZINC000100003913	Indanes	Indanones	1544	-4.69	-7.37065	-7.4	4.69	7.37065	7.4	1.59384	1.10282	0.528	0.055	0.045	0.38	0.33325	15	0	0	0	0	2	0	0	3	256.688	4.7053	11	2	0	0	0	0	0	0.05	20	0	0	78.92	27	1	0	0	1	0	0	0	2
Allylprodine	ZINC000005459478	Piperidines	Phenylpiperidines	1545	-4.04	-6.49106	-6.5	4.04	6.49106	6.5	2.09192	1.47311	0.844	0.332	0.313	0.61	0.59425	11	7	1	0	0	2	0	0	2	287.403	8.1283	27	2	1	1	0	0	1	0.272727	22	1	0	110.929	46	0	0	0	0	0	0	1	2
Allylprodine	ZINC000005459478	Piperidines	Phenylpiperidines	1546	-4.84	-4.00161	-4	4.84	4.00161	4	2.58744	1.76103	0.446	0.998	0.998	0.8	0.761	11	7	1	0	0	2	0	0	2	287.403	8.1283	27	2	1	1	0	0	1	0.272727	22	1	0	110.929	46	0	0	0	0	0	0	1	2
Allylprodine	ZINC000005459478	Piperidines	Phenylpiperidines	1547	-3.64	-5.80827	-5.8	3.64	5.80827	5.8	2.63064	1.13889	0.947	0.721	0.715	0.817	0.824	11	7	1	0	0	2	0	0	2	287.403	8.1283	27	2	1	1	0	0	1	0.272727	22	1	0	110.929	46	0	0	0	0	0	0	1	2
Hexopyrronium	ZINC000000000364	Benzene and substituted derivatives	?	1548	-4.99	-6.14407	-6	4.99	6.14407	6	3.02837	1.88895	0.364	0.528	0.6	0.939	0.7105	16	4	1	0	0	3	0	0	3	332.464	8.8366	33	3	1	1	0	1	1	0.192308	26	1	0	125.782	54	0	0	0	0	0	0	1	3
Hexopyrronium	ZINC000000000364	Benzene and substituted derivatives	?	1549	-3.64	-5.38295	-5.6	3.64	5.38295	5.6	2.57417	1.57205	0.947	0.898	0.81	0.794	0.83625	16	4	1	0	0	3	0	0	3	332.464	8.8366	33	3	1	1	0	1	1	0.192308	26	1	0	125.782	54	0	0	0	0	0	0	1	3
Hexopyrronium	ZINC000000000364	Benzene and substituted derivatives	?	1550	-4.93	-5.52285	-5.4	4.93	5.52285	5.4	2.99613	2.01859	0.395	0.849	0.888	0.93	0.78575	16	4	1	0	0	3	0	0	3	332.464	8.8366	33	3	1	1	0	1	1	0.192308	26	1	0	125.782	54	0	0	0	0	0	0	1	3
Terfluranol	ZINC000000002135	Stilbenes	?	1551	-4.03	-5.3444	-5.1	4.03	5.3444	5.1	3.53126	1.50541	0.847	0.909	0.952	0.991	0.94525	12	5	0	0	0	2	0	0	2	310.315	6.3191	19	2	2	2	0	0	0	0.217391	23	0	0	98.005	39	3	0	0	0	0	3	0	2
Terfluranol	ZINC000000002135	Stilbenes	?	1552	-4.71	-5.93318	-5.8	4.71	5.93318	5.8	3.87095	2.49519	0.516	0.648	0.715	0.999	0.80725	15	2	0	0	0	2	0	0	3	310.315	6.3191	19	2	2	2	0	0	0	0.217391	23	0	0	98.005	39	3	0	0	0	0	3	0	2
Terfluranol	ZINC000000002135	Stilbenes	?	1553	-3.9	-6.05739	-5.7	3.9	6.05739	5.7	3.79418	2.39118	0.887	0.578	0.763	0.998	0.9115	15	2	0	0	0	2	0	0	3	310.315	6.3191	19	2	2	2	0	0	0	0.217391	23	0	0	98.005	39	3	0	0	0	0	3	0	2
Indeloxazine	ZINC000000900543	Indenes and isoindenes	?	1554	-4.67	-6.58085	-6.5	4.67	6.58085	6.5	1.79003	1.25099	0.538	0.287	0.313	0.464	0.44475	13	1	1	0	1	1	0	0	3	231.295	6.4936	19	2	1	0	0	0	1	0.157895	19	1	0	83.4953	34	0	0	0	0	0	0	1	2
Indeloxazine	ZINC000000900543	Indenes and isoindenes	?	1555	-4.69	-6.4664	-6.4	4.69	6.4664	6.4	1.55842	1.08565	0.528	0.346	0.362	0.366	0.4055	13	1	1	0	1	1	0	0	3	231.295	6.4936	19	2	1	0	0	0	1	0.157895	19	1	0	83.4953	34	0	0	0	0	0	0	1	2
Indeloxazine	ZINC000000900543	Indenes and isoindenes	?	1556	-4.96	-6.4565	-6.4	4.96	6.4565	6.4	1.13078	0.790472	0.378	0.35	0.362	0.165	0.2675	13	1	1	0	1	1	0	0	3	231.295	6.4936	19	2	1	0	0	0	1	0.157895	19	1	0	83.4953	34	0	0	0	0	0	0	1	2
Flutomidate	ZINC000072266234	Azoles	Imidazoles	1557	-5.12	-6.14295	-6.1	5.12	6.14295	6.1	0.850369	0.577706	0.295	0.529	0.538	0.065	0.24075	9	5	2	0	0	2	0	0	2	262.284	5.3084	18	4	0	0	0	0	0	0.25	20	1	0	84.6825	34	1	0	0	0	0	1	2	2
Flutomidate	ZINC000072266234	Azoles	Imidazoles	1558	-4.69	-6.28959	-6.1	4.69	6.28959	6.1	3.00488	1.34426	0.528	0.443	0.538	0.934	0.7335	9	5	2	0	0	2	0	0	2	262.284	5.3084	18	4	0	0	0	0	0	0.25	20	1	0	84.6825	34	1	0	0	0	0	1	2	2
Flutomidate	ZINC000072266234	Azoles	Imidazoles	1559	-4.15	-6.40021	-5.9	4.15	6.40021	5.9	2.90328	1.28133	0.803	0.381	0.662	0.906	0.81925	9	5	2	0	0	2	0	0	2	262.284	5.3084	18	4	0	0	0	0	0	0.25	20	1	0	84.6825	34	1	0	0	0	0	1	2	2
Metazamide	ZINC000000000472	Azoles	Imidazoles	1560	-4.44	-5.57678	-5.6	4.44	5.57678	5.6	1.20261	0.815254	0.664	0.83	0.81	0.2	0.4685	9	2	2	0	0	2	0	0	2	204.229	3.5984	14	3	1	1	0	0	0	0.125	16	1	0	70.4374	27	0	0	0	0	0	0	2	2
Metazamide	ZINC000000000472	Azoles	Imidazoles	1561	-4.42	-5.885	-5.9	4.42	5.885	5.9	0.993797	0.672273	0.677	0.68	0.662	0.104	0.38675	9	2	2	0	0	2	0	0	2	204.229	3.5984	14	3	1	1	0	0	0	0.125	16	1	0	70.4374	27	0	0	0	0	0	0	2	2
Metazamide	ZINC000000000472	Azoles	Imidazoles	1562	-4.42	-5.89207	-5.9	4.42	5.89207	5.9	0.673438	0.443187	0.677	0.676	0.662	0.031	0.35025	9	2	2	0	0	2	0	0	2	204.229	3.5984	14	3	1	1	0	0	0	0.125	16	1	0	70.4374	27	0	0	0	0	0	0	2	2
Idropranolol	ZINC000000000383	Naphthalenes	?	1563	-4.99	-6.65095	-6.5	4.99	6.65095	6.5	1.41633	0.803787	0.364	0.259	0.313	0.302	0.32025	10	6	0	1	0	2	0	0	2	261.365	7.459	25	2	2	1	0	1	1	0.3	20	0	0	104.495	42	0	0	0	0	0	0	1	2
Idropranolol	ZINC000000000383	Naphthalenes	?	1564	-5.14	-6.44422	-6.4	5.14	6.44422	6.4	1.79606	0.66528	0.285	0.356	0.362	0.468	0.39575	10	6	0	1	0	2	0	0	2	261.365	7.459	25	2	2	1	0	1	1	0.3	20	0	0	104.495	42	0	0	0	0	0	0	1	2
Idropranolol	ZINC000000000383	Naphthalenes	?	1565	-5.18	-6.72491	-6.6	5.18	6.72491	6.6	1.50886	0.792431	0.264	0.228	0.268	0.345	0.3055	10	6	0	1	0	2	0	0	2	261.365	7.459	25	2	2	1	0	1	1	0.3	20	0	0	104.495	42	0	0	0	0	0	0	1	2
Lobenzarit	ZINC000000001625	Benzene and substituted derivatives	Benzoic acids and derivatives	1566	-5.19	-6.24656	-6.2	5.19	6.24656	6.2	2.50745	1.31024	0.259	0.464	0.474	0.77	0.56825	12	2	0	1	0	4	0	0	2	289.674	5.2242	11	4	1	3	2	0	0	0.190476	21	0	0	79.3914	28	1	0	0	1	0	0	1	4
Lobenzarit	ZINC000000001625	Benzene and substituted derivatives	Benzoic acids and derivatives	1567	-4.31	-5.73046	-5.8	4.31	5.73046	5.8	2.04407	0.782475	0.734	0.758	0.715	0.585	0.65475	12	2	0	1	0	4	0	0	2	289.674	5.2242	11	4	1	3	2	0	0	0.190476	21	0	0	79.3914	28	1	0	0	1	0	0	1	4
Lobenzarit	ZINC000000001625	Benzene and substituted derivatives	Benzoic acids and derivatives	1568	-4.37	-5.77061	-5.8	4.37	5.77061	5.8	2.02233	0.777323	0.702	0.738	0.715	0.575	0.64175	12	2	0	1	0	4	0	0	2	289.674	5.2242	11	4	1	3	2	0	0	0.190476	21	0	0	79.3914	28	1	0	0	1	0	0	1	4
Diclofenac	ZINC000000001281	Benzene and substituted derivatives	Halobenzenes	1569	-4.57	-6.67214	-6.7	4.57	6.67214	6.7	1.19463	0.829718	0.595	0.249	0.229	0.196	0.304	12	2	0	1	0	2	0	0	2	295.145	6.3227	12	2	1	2	1	0	0	0.2	20	0	0	86.0839	29	2	0	0	2	0	0	1	2
Diclofenac	ZINC000000001281	Benzene and substituted derivatives	Halobenzenes	1570	-4.5	-6.62902	-6.7	4.5	6.62902	6.7	1.4072	0.518888	0.634	0.266	0.229	0.299	0.36525	12	2	0	1	0	2	0	0	2	295.145	6.3227	12	2	1	2	1	0	0	0.2	20	0	0	86.0839	29	2	0	0	2	0	0	1	2
Diclofenac	ZINC000000001281	Benzene and substituted derivatives	Halobenzenes	1571	-4.85	-5.66727	-5.6	4.85	5.66727	5.6	0.302175	0.157147	0.44	0.785	0.81	0.002	0.3135	12	2	0	1	0	2	0	0	2	295.145	6.3227	12	2	1	2	1	0	0	0.2	20	0	0	86.0839	29	2	0	0	2	0	0	1	2
Butaverine	ZINC000001569382	Fatty Acyls	Fatty acid esters	1572	-5.07	-5.76118	-5.7	5.07	5.76118	5.7	2.18336	1.25145	0.32	0.743	0.763	0.651	0.59625	11	7	1	0	0	2	0	0	2	289.419	9.0512	29	2	1	1	0	0	1	0.363636	22	1	0	113.634	48	0	0	0	0	0	0	1	2
Butaverine	ZINC000001569382	Fatty Acyls	Fatty acid esters	1573	-4.49	-6.1809	-6.2	4.49	6.1809	6.2	2.24626	1.53133	0.638	0.505	0.474	0.675	0.6155	11	7	1	0	0	2	0	0	2	289.419	9.0512	29	2	1	1	0	0	1	0.363636	22	1	0	113.634	48	0	0	0	0	0	0	1	2
Butaverine	ZINC000001569382	Fatty Acyls	Fatty acid esters	1574	-4.64	-6.16819	-6.2	4.64	6.16819	6.2	2.02437	1.36185	0.551	0.513	0.474	0.576	0.54425	11	7	1	0	0	2	0	0	2	289.419	9.0512	29	2	1	1	0	0	1	0.363636	22	1	0	113.634	48	0	0	0	0	0	0	1	2
Acetomenaphthone	ZINC000000000867	Naphthalenes	?	1575	-4.54	-5.88304	-5.9	4.54	5.88304	5.9	0.601039	0.404354	0.614	0.681	0.662	0.022	0.33	10	5	0	0	0	4	0	0	2	258.273	4.9925	18	4	0	0	0	0	0	0.2	20	0	0	86.71	33	0	0	0	0	0	0	0	4
Acetomenaphthone	ZINC000000000867	Naphthalenes	?	1576	-4.36	-5.80144	-5.8	4.36	5.80144	5.8	2.0576	1.35113	0.707	0.725	0.715	0.592	0.6515	10	5	0	0	0	4	0	0	2	258.273	4.9925	18	4	0	0	0	0	0	0.2	20	0	0	86.71	33	0	0	0	0	0	0	0	4
Acetomenaphthone	ZINC000000000867	Naphthalenes	?	1577	-4	-6.39455	-6.4	4	6.39455	6.4	2.16878	0.963471	0.86	0.383	0.362	0.646	0.6285	10	5	0	0	0	4	0	0	2	258.273	4.9925	18	4	0	0	0	0	0	0.2	20	0	0	86.71	33	0	0	0	0	0	0	0	4
Milnacipran	ZINC000001846944	Benzene and substituted derivatives	Phenylacetamides	1578	-4.89	-4.19002	-4.1	4.89	4.19002	4.1	2.33476	1.22813	0.418	0.996	0.996	0.706	0.7065	9	6	0	2	0	1	0	0	2	246.354	7.0419	24	2	1	0	0	0	0	0.315789	19	0	0	97.7595	40	0	0	0	0	0	0	2	1
Milnacipran	ZINC000001846944	Benzene and substituted derivatives	Phenylacetamides	1579	-4.87	-4.34918	-4.2	4.87	4.34918	4.2	2.14725	1.45984	0.429	0.994	0.995	0.634	0.673	9	6	0	2	0	1	0	0	2	246.354	7.0419	24	2	1	0	0	0	0	0.315789	19	0	0	97.7595	40	0	0	0	0	0	0	2	1
Milnacipran	ZINC000001846944	Benzene and substituted derivatives	Phenylacetamides	1580	-4.13	-4.89441	-4.6	4.13	4.89441	4.6	2.30503	0.737144	0.812	0.972	0.988	0.694	0.797	9	6	0	2	0	1	0	0	2	246.354	7.0419	24	2	1	0	0	0	0	0.315789	19	0	0	97.7595	40	0	0	0	0	0	0	2	1
Arbaclofen	ZINC000000000061	Carboxylic acids and derivatives	Amino acids, peptides, and analogues	1581	-3.97	-5.26943	-5.1	3.97	5.26943	5.1	2.13656	0.963694	0.868	0.921	0.952	0.631	0.7705	6	4	0	1	0	2	0	0	1	212.656	4.9752	12	2	1	1	1	0	0	0.285714	14	0	0	66.072	25	1	0	0	1	0	0	1	2
Arbaclofen	ZINC000000000061	Carboxylic acids and derivatives	Amino acids, peptides, and analogues	1582	-3.94	-5.37115	-5.2	3.94	5.37115	5.2	2.60121	0.694151	0.877	0.902	0.933	0.804	0.8545	6	4	0	1	0	2	0	0	1	212.656	4.9752	12	2	1	1	1	0	0	0.285714	14	0	0	66.072	25	1	0	0	1	0	0	1	2
Arbaclofen	ZINC000000000061	Carboxylic acids and derivatives	Amino acids, peptides, and analogues	1583	-3.6	-5.75421	-5.6	3.6	5.75421	5.6	2.40114	1.57528	0.953	0.746	0.81	0.732	0.80675	6	4	0	1	0	2	0	0	1	212.656	4.9752	12	2	1	1	1	0	0	0.285714	14	0	0	66.072	25	1	0	0	1	0	0	1	2
Pentalamide	ZINC000001999301	Benzene and substituted derivatives	Benzoic acids and derivatives	1584	-4.46	-5.7288	-5.6	4.46	5.7288	5.6	2.61121	0.773186	0.652	0.76	0.81	0.807	0.769	6	6	0	1	0	2	0	0	1	207.273	6.0293	20	3	1	0	0	0	0	0.4	15	0	0	78.0373	32	0	0	0	0	0	0	1	2
Pentalamide	ZINC000001999301	Benzene and substituted derivatives	Benzoic acids and derivatives	1585	-4.35	-5.6733	-5.6	4.35	5.6733	5.6	2.3541	0.60999	0.713	0.783	0.81	0.714	0.73775	6	6	0	1	0	2	0	0	1	207.273	6.0293	20	3	1	0	0	0	0	0.4	15	0	0	78.0373	32	0	0	0	0	0	0	1	2
Pentalamide	ZINC000001999301	Benzene and substituted derivatives	Benzoic acids and derivatives	1586	-4.33	-5.64704	-5.8	4.33	5.64704	5.8	2.21502	1.33145	0.724	0.798	0.715	0.663	0.69125	6	6	0	1	0	2	0	0	1	207.273	6.0293	20	3	1	0	0	0	0	0.4	15	0	0	78.0373	32	0	0	0	0	0	0	1	2
Fencibutirol	ZINC000001999545	Prenol lipids	Monoterpenoids	1587	-4.01	-5.4896	-5.4	4.01	5.4896	5.4	2.24152	1.29378	0.856	0.863	0.888	0.674	0.773	12	4	0	0	0	3	0	0	2	261.341	6.4109	23	3	1	2	1	1	0	0.2	20	0	0	96.1213	40	0	0	0	0	0	0	0	3
Fencibutirol	ZINC000001999545	Prenol lipids	Monoterpenoids	1588	-4.08	-5.52052	-5.4	4.08	5.52052	5.4	2.04777	1.30107	0.829	0.851	0.888	0.587	0.72275	12	4	0	0	0	3	0	0	2	261.341	6.4109	23	3	1	2	1	1	0	0.2	20	0	0	96.1213	40	0	0	0	0	0	0	0	3
Fencibutirol	ZINC000001999545	Prenol lipids	Monoterpenoids	1589	-3.66	-4.56807	-4.6	3.66	4.56807	4.6	2.22961	1.31038	0.942	0.988	0.988	0.668	0.8165	12	4	0	0	0	3	0	0	2	261.341	6.4109	23	3	1	2	1	1	0	0.2	20	0	0	96.1213	40	0	0	0	0	0	0	0	3
Propoxate	ZINC000013209330	Azoles	Imidazoles	1590	-4.61	-5.62999	-5.6	4.61	5.62999	5.6	1.99508	0.638258	0.569	0.808	0.81	0.56	0.62475	9	6	2	0	0	2	0	0	2	258.321	5.9991	21	4	0	0	0	0	0	0.3	20	1	0	92.7025	37	0	0	0	0	0	0	2	2
Propoxate	ZINC000013209330	Azoles	Imidazoles	1591	-4.54	-5.48289	-5.6	4.54	5.48289	5.6	1.75882	0.782898	0.614	0.864	0.81	0.453	0.5825	9	6	2	0	0	2	0	0	2	258.321	5.9991	21	4	0	0	0	0	0	0.3	20	1	0	92.7025	37	0	0	0	0	0	0	2	2
Propoxate	ZINC000013209330	Azoles	Imidazoles	1592	-4.48	-5.95593	-5.9	4.48	5.95593	5.9	2.45881	1.66083	0.643	0.634	0.662	0.754	0.70325	9	6	2	0	0	2	0	0	2	258.321	5.9991	21	4	0	0	0	0	0	0.3	20	1	0	92.7025	37	0	0	0	0	0	0	2	2
Furfenorex	ZINC000031544973	Benzene and substituted derivatives	Phenethylamines	1593	-4.76	-6.42026	-6.4	4.76	6.42026	6.4	1.8903	0.540695	0.49	0.37	0.362	0.514	0.47	10	5	0	1	1	0	0	0	2	229.323	7.1213	19	1	1	1	0	0	1	0.277778	18	1	0	91.6257	36	0	0	0	0	0	0	1	1
Furfenorex	ZINC000031544973	Benzene and substituted derivatives	Phenethylamines	1594	-4.27	-6.44065	-6.4	4.27	6.44065	6.4	1.83143	1.25093	0.751	0.359	0.362	0.484	0.52025	10	5	0	1	1	0	0	0	2	229.323	7.1213	19	1	1	1	0	0	1	0.277778	18	1	0	91.6257	36	0	0	0	0	0	0	1	1
Furfenorex	ZINC000031544973	Benzene and substituted derivatives	Phenethylamines	1595	-4.4	-6.0183	-6	4.4	6.0183	6	1.99616	1.2303	0.688	0.601	0.6	0.561	0.6025	10	5	0	1	1	0	0	0	2	229.323	7.1213	19	1	1	1	0	0	1	0.277778	18	1	0	91.6257	36	0	0	0	0	0	0	1	1
Metapramine	ZINC000004626658	Benzazepines	Dibenzazepines	1596	-3.84	-5.95346	-6.1	3.84	5.95346	6.1	1.3846	0.870182	0.905	0.636	0.538	0.288	0.50475	14	2	1	1	0	0	0	0	3	238.334	7.2307	19	0	1	0	0	0	1	0.05	20	1	0	93.3033	36	0	0	0	0	0	0	2	0
Metapramine	ZINC000004626658	Benzazepines	Dibenzazepines	1597	-4.32	-5.59055	-5.6	4.32	5.59055	5.6	1.30139	0.904349	0.729	0.824	0.81	0.246	0.50775	14	2	1	1	0	0	0	0	3	238.334	7.2307	19	0	1	0	0	0	1	0.05	20	1	0	93.3033	36	0	0	0	0	0	0	2	0
Metapramine	ZINC000004626658	Benzazepines	Dibenzazepines	1598	-4.31	-5.59047	-5.6	4.31	5.59047	5.6	1.01868	0.705504	0.734	0.825	0.81	0.115	0.4435	14	2	1	1	0	0	0	0	3	238.334	7.2307	19	0	1	0	0	0	1	0.05	20	1	0	93.3033	36	0	0	0	0	0	0	2	0
Thozalinone	ZINC000000000764	Benzene and substituted derivatives	?	1599	-3.93	-5.83232	-5.8	3.93	5.83232	5.8	1.32094	0.299994	0.88	0.708	0.715	0.256	0.52675	9	2	1	1	1	1	0	0	2	204.229	3.0458	16	4	0	0	0	0	1	0.125	16	1	0	66.2632	27	0	0	0	0	0	0	2	2
Thozalinone	ZINC000000000764	Benzene and substituted derivatives	?	1600	-3.98	-5.823	-5.8	3.98	5.823	5.8	1.5953	0.307988	0.865	0.714	0.715	0.38	0.585	9	2	1	1	1	1	0	0	2	204.229	3.0458	16	4	0	0	0	0	1	0.125	16	1	0	66.2632	27	0	0	0	0	0	0	2	2
Thozalinone	ZINC000000000764	Benzene and substituted derivatives	?	1601	-4.47	-6.24794	-6.3	4.47	6.24794	6.3	1.23673	0.251205	0.648	0.463	0.421	0.218	0.37625	9	2	1	1	1	1	0	0	2	204.229	3.0458	16	4	0	0	0	0	1	0.125	16	1	0	66.2632	27	0	0	0	0	0	0	2	2
Flutonidine	ZINC000000001480	Benzene and substituted derivatives	Aniline and substituted anilines	1602	-4.61	-5.65362	-5.6	4.61	5.65362	5.6	1.31854	0.910863	0.569	0.793	0.81	0.255	0.47225	9	1	2	1	0	0	0	0	2	193.225	3.9679	15	3	2	2	0	0	2	0.133333	15	1	0	62.1252	26	1	0	0	0	0	1	3	0
Flutonidine	ZINC000000001480	Benzene and substituted derivatives	Aniline and substituted anilines	1603	-4.36	-5.69718	-5.6	4.36	5.69718	5.6	1.71189	0.0542529	0.707	0.772	0.81	0.433	0.59575	9	1	2	1	0	0	0	0	2	193.225	3.9679	15	3	2	2	0	0	2	0.133333	15	1	0	62.1252	26	1	0	0	0	0	1	3	0
[truncated: 2,755 more rows]
[truncated: 21 more columns]

## Sheet: Top 150
name	ZINC	Class	Subclass	key	LedockScore	SminaScore	VinaScore	LedockScore	SminaScore	VinaScore	Av.RMSD	Std.RMSD	LedockPC	SminaPC	VinaPC	RMSDPC	ComboPC	C.ring	C.other	N.ring	N.other	O.ring	O.other	P	S	#.of.Ring	Molecular_weight	LogP	Number_of_HBA_1	Number_of_HBA_2	Number_of_HBD_1	Number_of_HBD_2	Number_of_acidic_groups	Number_of_aliphatic_OH_groups	Number_of_basic_groups	Fraction_of_rotatable_bonds	Number_of_heavy_bonds	Number_of_heterocycles	Number_of_hydrophobic_groups	MolarRefractivity	Number_of_atoms	Number_of_halogen_atoms	Number_of_B_atoms	Number_of_Br_atoms	Number_of_Cl_atoms	Number_of_I_atoms	Number_of_F_atoms	Number_of_N_atoms	Number_of_O_atoms
[truncated: 154 more rows]
[truncated: 21 more columns]

[truncated: 1 more sheets: Pivot]
